# Supplementary material for: Enantiopure 3-methyl-3,4-dihydroisocoumarins and 3-methyl-1,2,3,4-tetrahydroisoquinolines via chemoenzymatic asymmetric transformations
Source: Royal Society of Chemistry journal article supplement (doi:10.1039/c2cy20152f), 2012-01-01
Supplement: c2cy20152f_2.pdf [file c2cy20152f_2.pdf]

# Access to enantiopure 3-methyl-3,4-dihydroisocoumarins and 3-methyl-1,2,3,4-tetrahydroisoquinolines via chemoenzymatic asymmetric transformations

Juan Mangas-Sánchez, Eduardo Busto, Vicente Gotor-Fernández, \* Vicente Gotor\*

Departamento de Química Orgánica e Inorgánica and Instituto Universitario de Biotecnología de Asturias, Universidad de Oviedo, 33006 Oviedo, Spain. Fax: +34 985 103448.  
vicgotfer@uniovi.es; vgs@uniovi.es

NMR spectra (page 1 of 131 pages)

## Table of Contents

|                                                                                     |      |
|-------------------------------------------------------------------------------------|------|
| 2-(2-Hydroxypropyl)benzotrile (2a),.....                                            | S3   |
| 2-(2-Hydroxypropyl)-5-methoxybenzotrile (2b),.....                                  | S6   |
| 2-(2-Hydroxypropyl)-5-methylbenzotrile (2c),.....                                   | S9   |
| 2-(2-Hydroxypropyl)-3-methylbenzotrile (2d),.....                                   | S12  |
| 2-(2-Hydroxypropyl)-4-methylbenzotrile (2e),.....                                   | S15  |
| 4-Fluoro-2-(2-Hydroxypropyl)benzotrile (2f),.....                                   | S18  |
| 1-(2-Cyanophenyl)propan-2-yl acetate (3a),.....                                     | S21  |
| 1-(2-Cyano-4-methoxyphenyl)propan-2-yl acetate (3b),.....                           | S24  |
| 1-(2-Cyano-4-methylphenyl)propan-2-yl acetate (3c),.....                            | S27  |
| 1-(2-Cyano-6-methylphenyl)propan-2-yl acetate (3d),.....                            | S30  |
| 1-(2-Cyano-5-methylphenyl)propan-2-yl acetate (3e),.....                            | S33  |
| 1-(2-Cyano-5-fluorophenyl)propan-2-yl acetate (3f),.....                            | S36  |
| 2-(2-Oxopropyl)benzotrile (4a),.....                                                | S39  |
| 5-Methoxy-2-(2-oxopropyl)benzotrile (4b),.....                                      | S42  |
| 5-Methyl-2-(2-oxopropyl)benzotrile (4c),.....                                       | S45  |
| 3-Methyl-2-(2-oxopropyl)benzotrile (4d),.....                                       | S48  |
| 4-Methyl-2-(2-oxopropyl)benzotrile (4e),.....                                       | S51  |
| 4-Fluoro-2-(2-oxopropyl)benzotrile (4f),.....                                       | S54  |
| (S)-3-Methylisochroman-1-one (5a),.....                                             | S57  |
| (S)-7-Methoxy-3-methylisochroman-1-one (5b),.....                                   | S60  |
| (S)-3,7-Dimethylisochroman-1-one (5c),.....                                         | S63  |
| (S)-3,5-Dimethylisochroman-1-one (5d),.....                                         | S66  |
| (S)-3,6-Dimethylisochroman-1-one (5e),.....                                         | S69  |
| (S)-6-Fluoro-3-methylisochroman-1-one (5f),.....                                    | S72  |
| (S)-1-(2-Cyanophenyl)propan-2-yl methanesulfonate (6a),.....                        | S75  |
| (S)-1-(2-Cyano-4-methoxyphenyl)propan-2-yl methanesulfonate (6b),.....              | S78  |
| (S)-1-(2-Cyano-4-methylphenyl)propan-2-yl methanesulfonate (6c),.....               | S81  |
| (S)-1-(2-Cyano-6-methylphenyl)propan-2-yl methanesulfonate (6d),.....               | S84  |
| (S)-1-(2-Cyano-5-methylphenyl)propan-2-yl methanesulfonate (6e),.....               | S87  |
| (S)-1-(2-Cyano-5-fluorophenyl)propan-2-yl methanesulfonate (6f),.....               | S90  |
| (S)-1-(2-(Pivalamidomethyl)phenyl)propan-2-yl methanesulfonate (7a),.....           | S93  |
| (S)-1-(4-Methoxy-2-(pivalamidomethyl)phenyl)propan-2-yl methanesulfonate (7b),..... | S96  |
| (S)-1-(4-Methyl-2-(pivalamidomethyl)phenyl)propan-2-yl methanesulfonate (7c),.....  | S99  |
| (S)-1-(2-Methyl-6-(pivalamidomethyl)phenyl)propan-2-yl methanesulfonate (7d),.....  | S102 |
| (S)-1-(5-Methyl-2-(pivalamidomethyl)phenyl)propan-2-yl methanesulfonate (7e),.....  | S105 |

|                                                                                                         |      |
|---------------------------------------------------------------------------------------------------------|------|
| (S)-1-(5-Fluoro-2-(pivalamidomethyl)phenyl)propan-2-yl methanesulfonate (7f),.....                      | S108 |
| (R)-2,2-Dimethyl-1-(3-methyl-3,4-dihydroisoquinolin-2(1 <i>H</i> )-yl)propan-1-one (8a),.....           | S111 |
| (R)-1-(7-Methoxy-3-methyl-3,4-dihydroisoquinolin-2(1 <i>H</i> )-yl)-2,2-dimethylpropan-1-one (8b),..... | S114 |
| (R)-1-(3,7-Dimethyl-3,4-dihydroisoquinolin-2(1 <i>H</i> )-yl)-2,2-dimethylpropan-1-one (8c),.....       | S117 |
| (R)-1-(3,5-Dimethyl-3,4-dihydroisoquinolin-2(1 <i>H</i> )-yl)-2,2-dimethylpropan-1-one (8d),.....       | S120 |
| (R)-3-methyl-1,2,3,4-tetrahydroisoquinoline (9a),.....                                                  | S123 |
| (R)-3,6-Dimethyl-1,2,3,4-tetrahydroisoquinoline (9e),.....                                              | S126 |
| (R)-6-Fluoro-3-methyl-1,2,3,4-tetrahydroisoquinoline (9f),.....                                         | S129 |

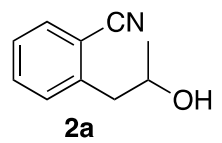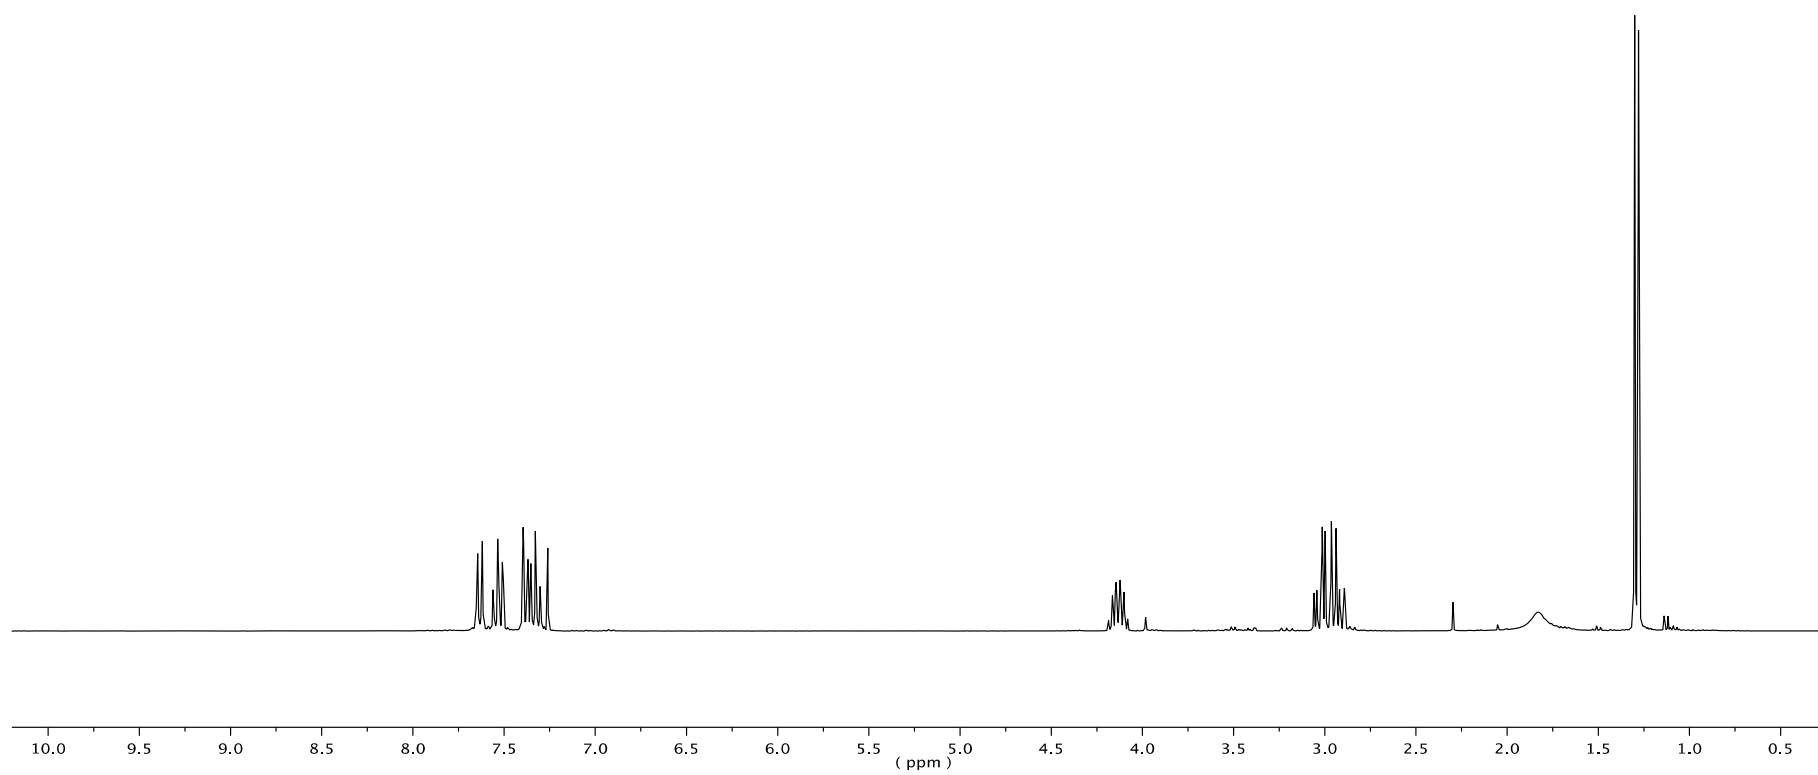

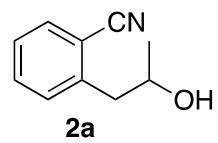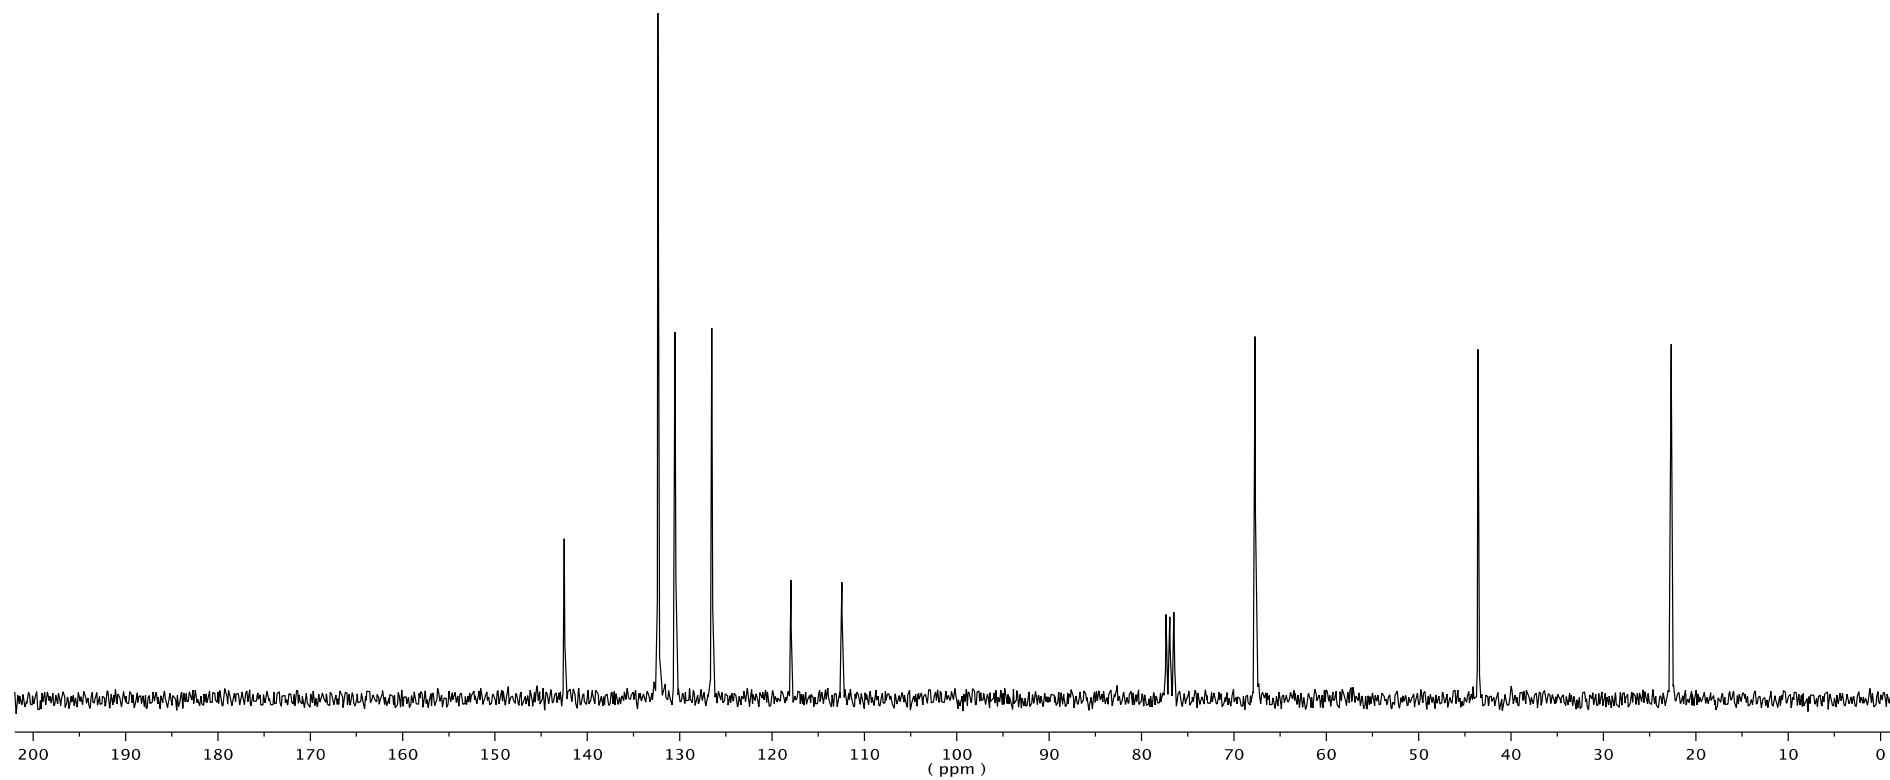

S4

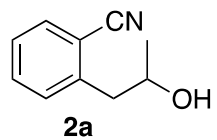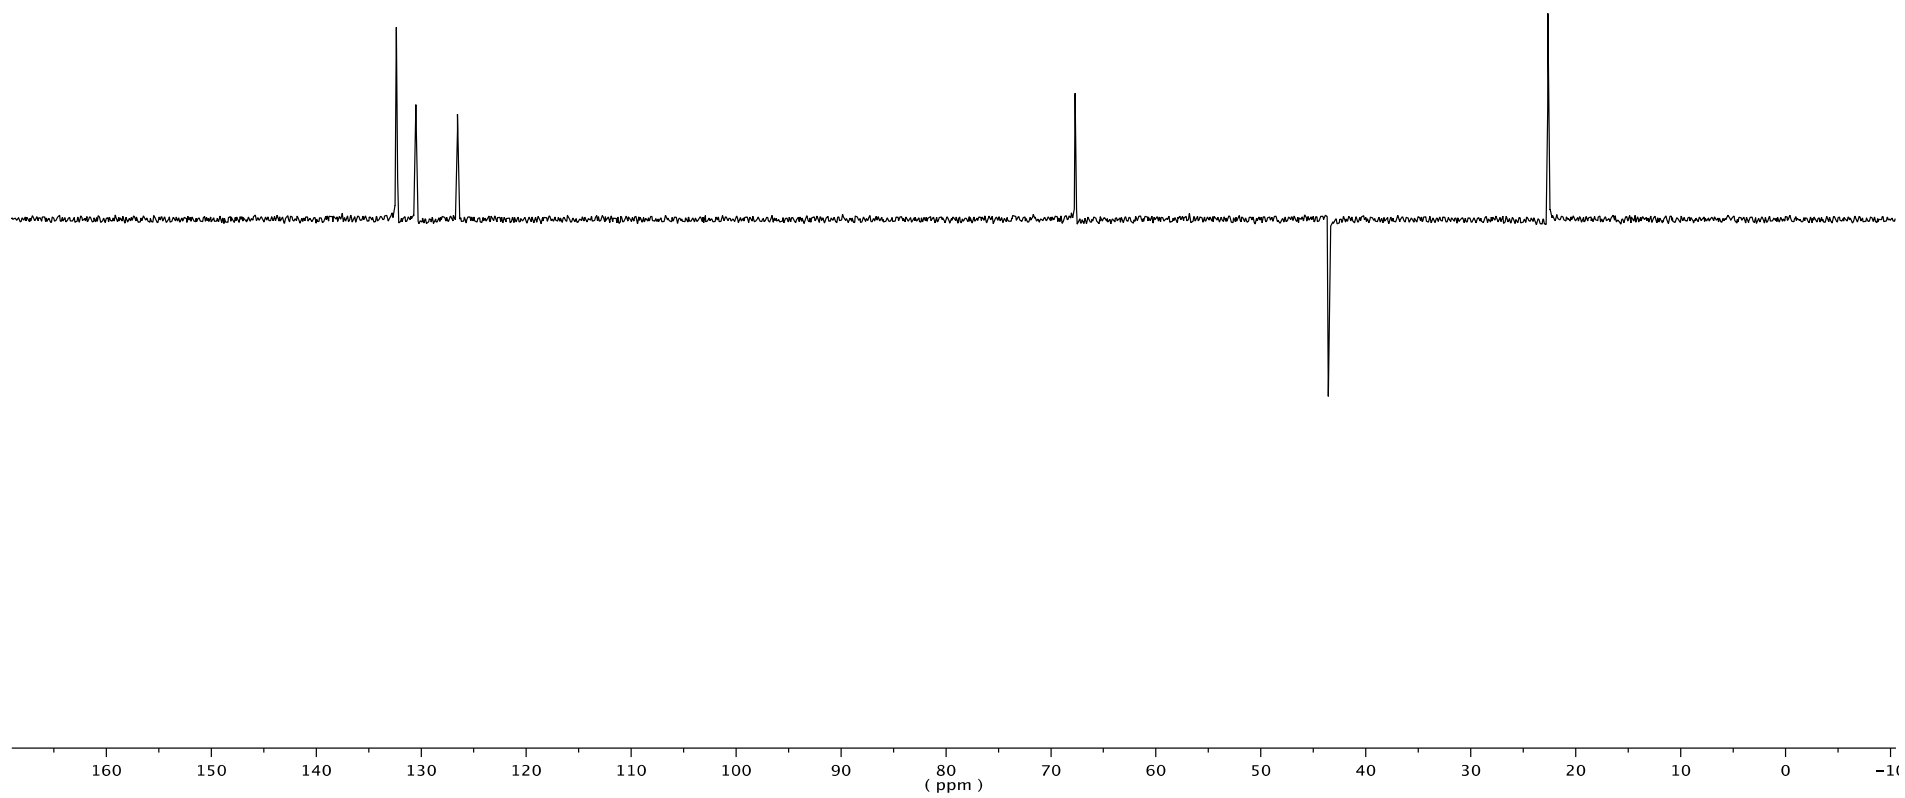

S5

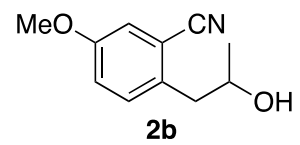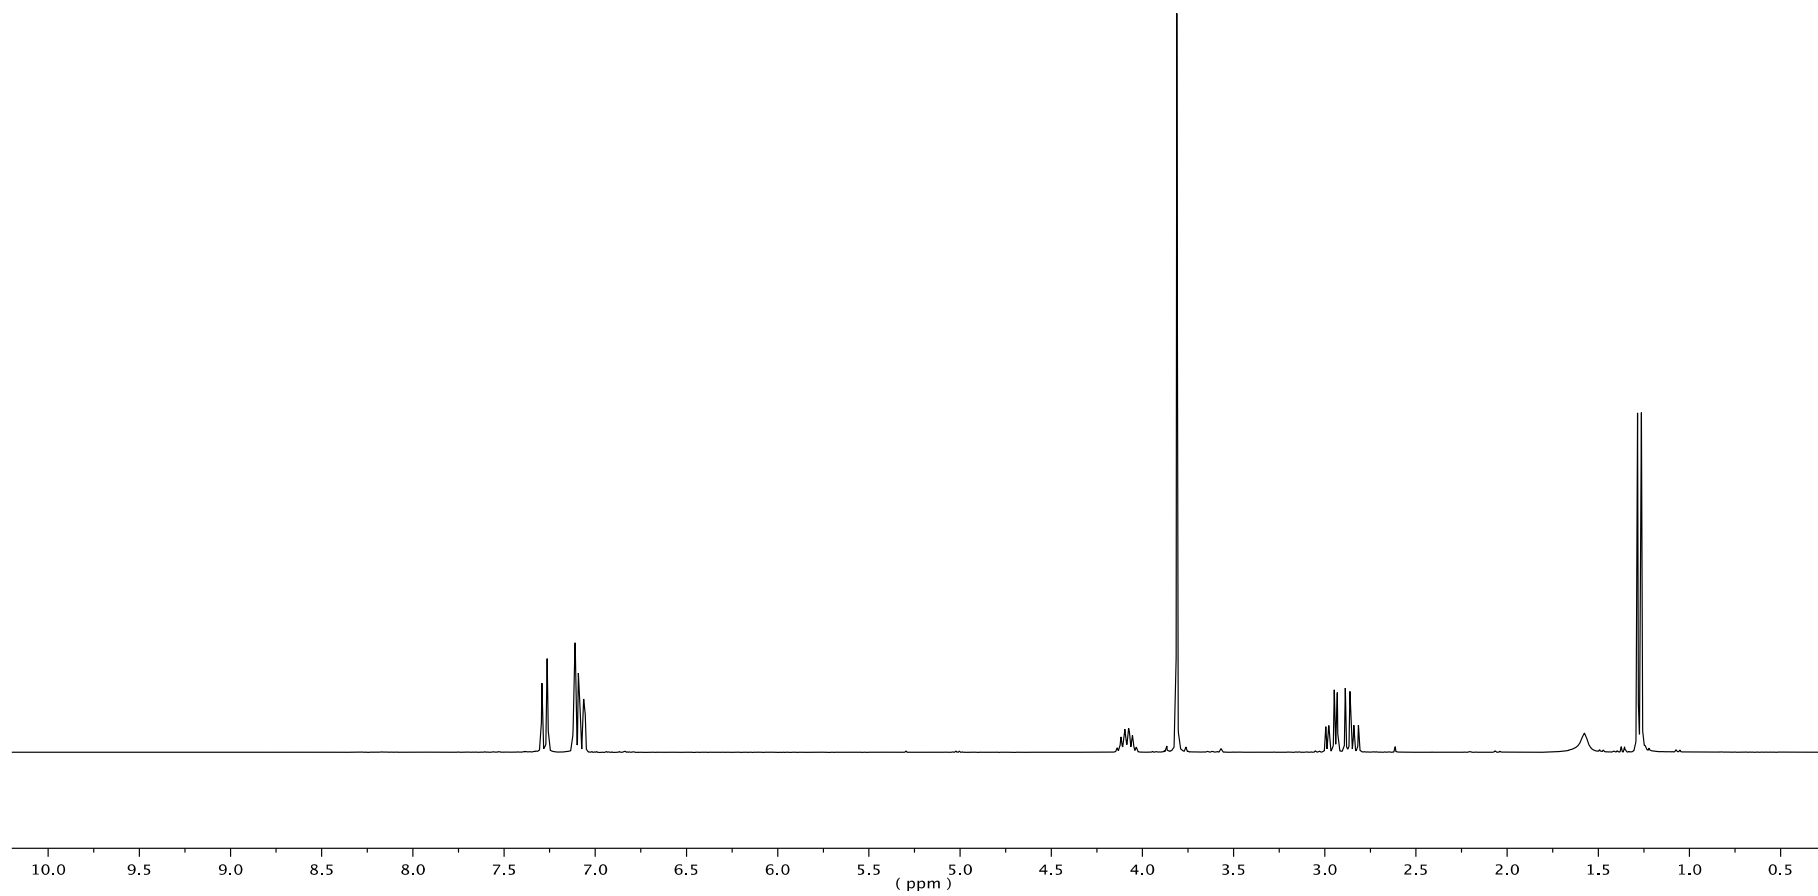

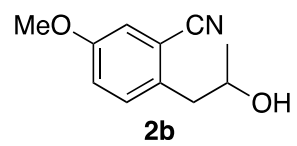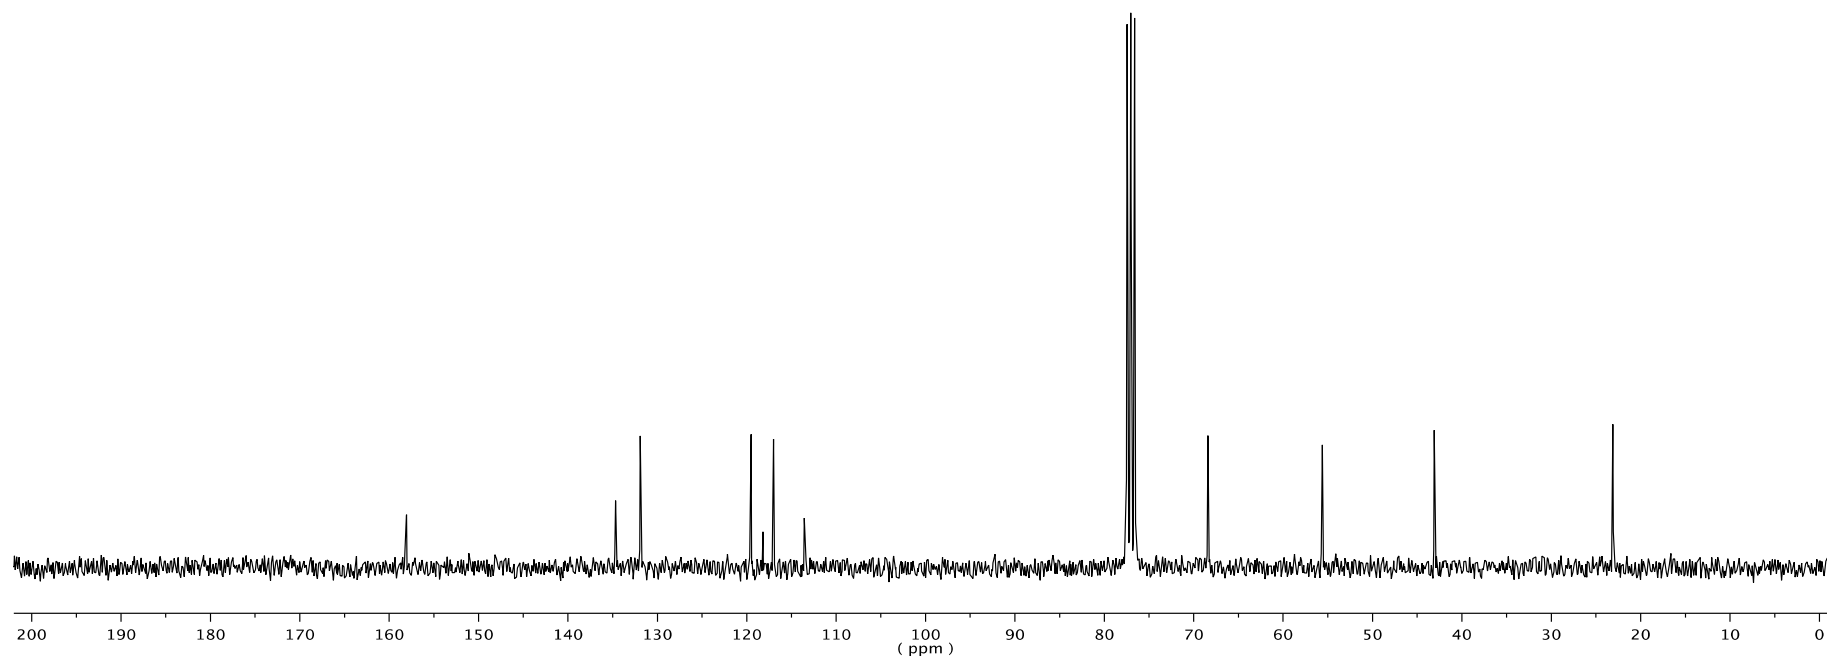

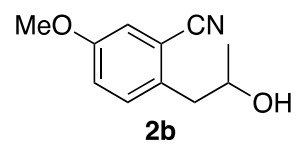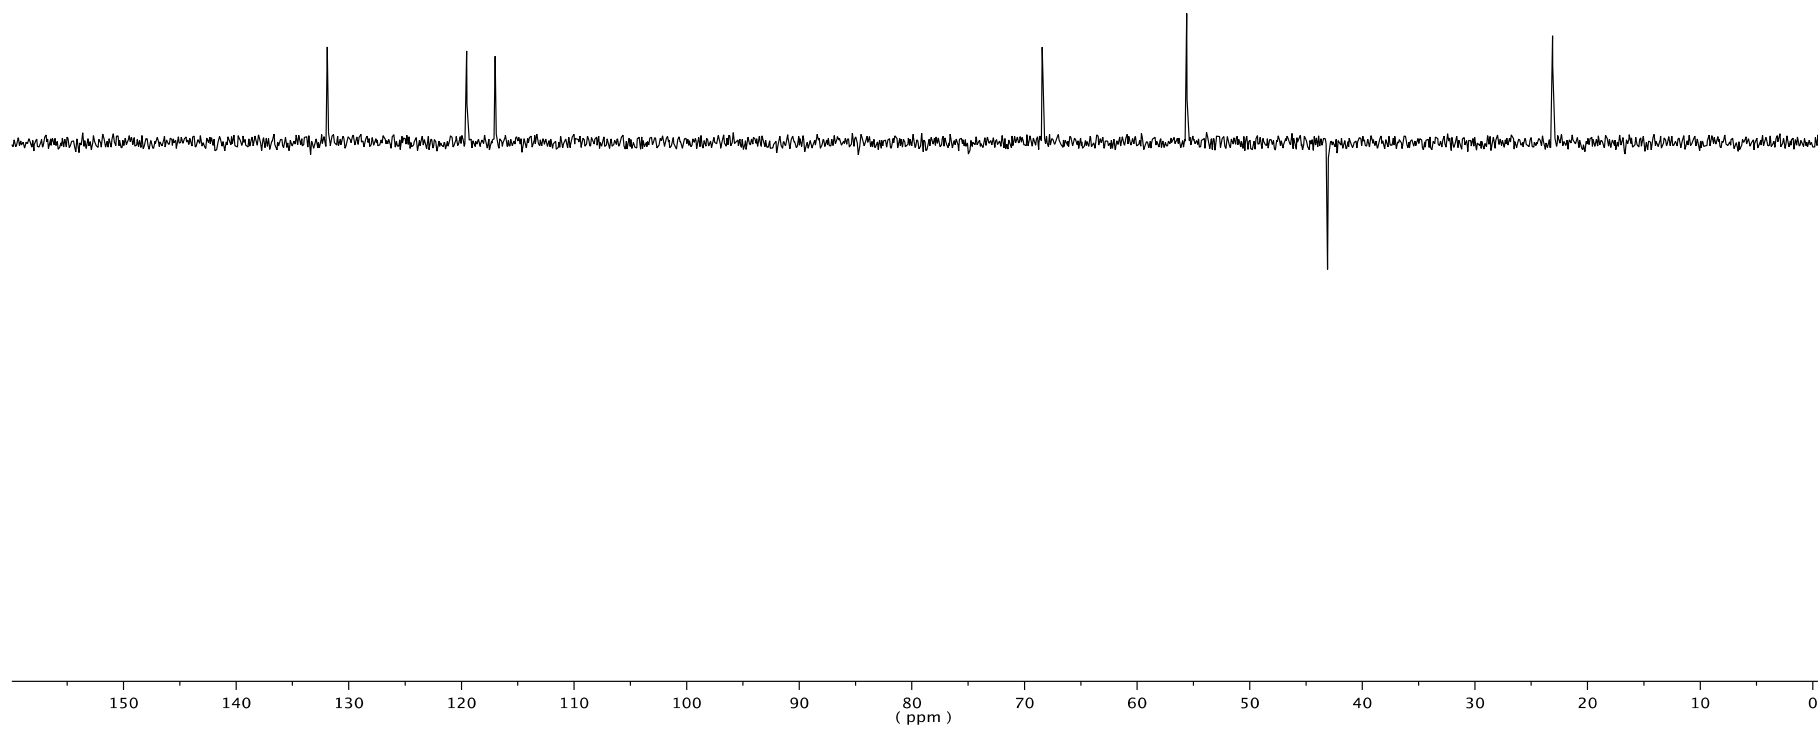



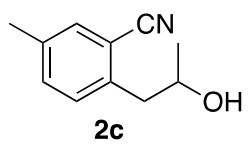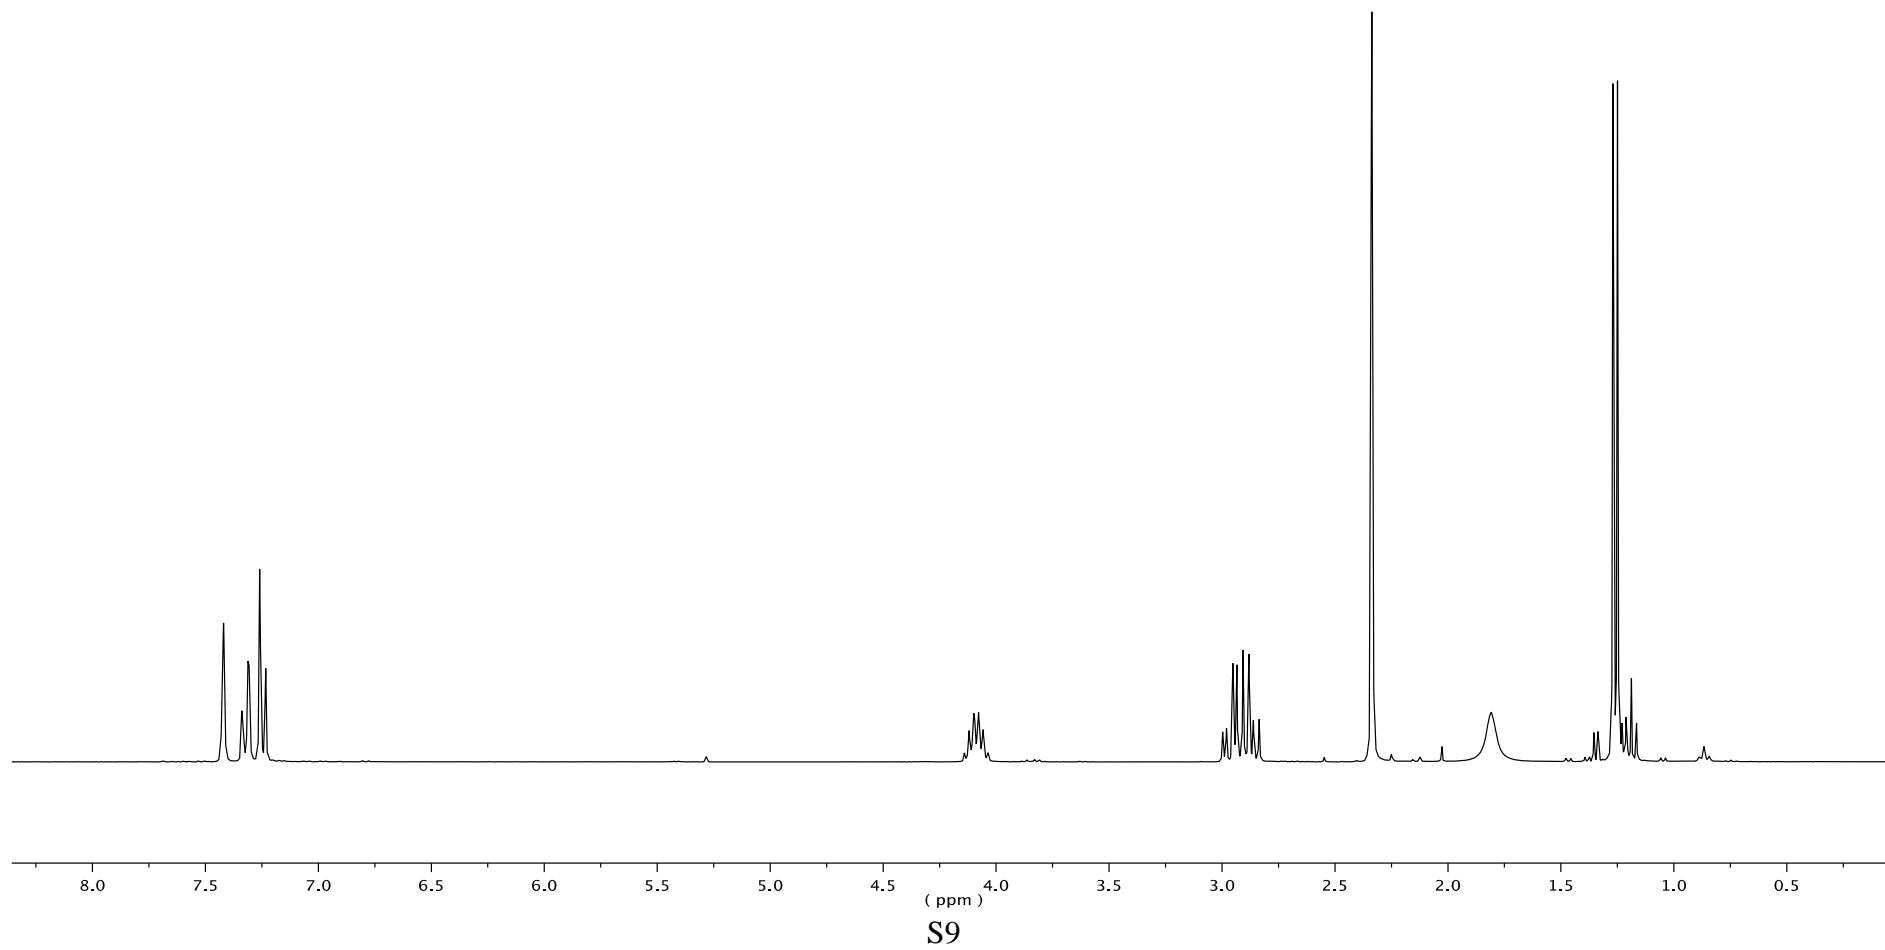

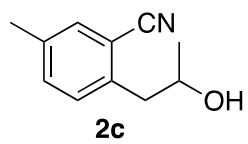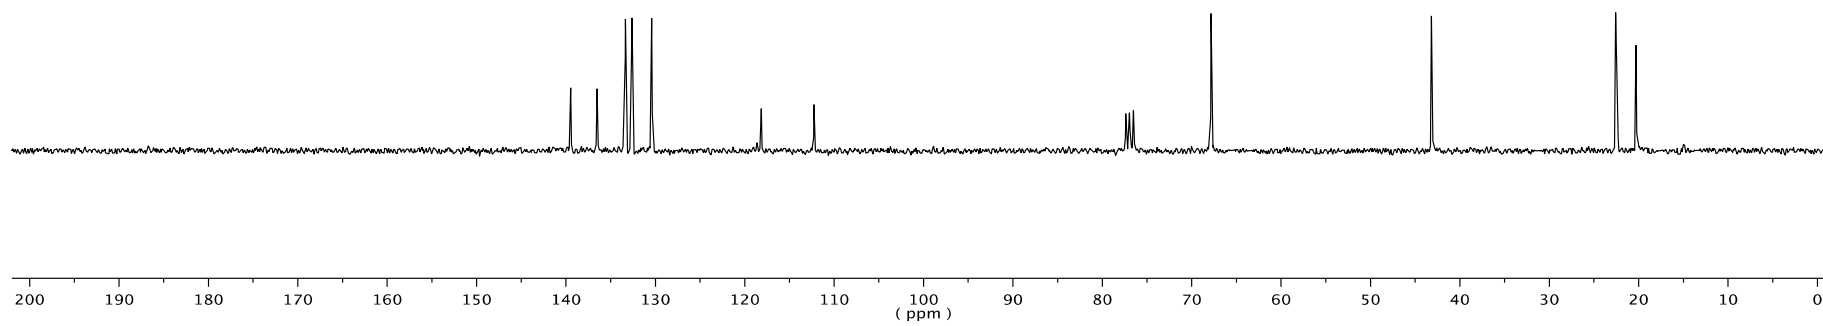

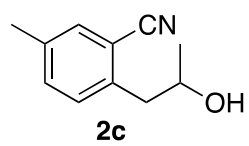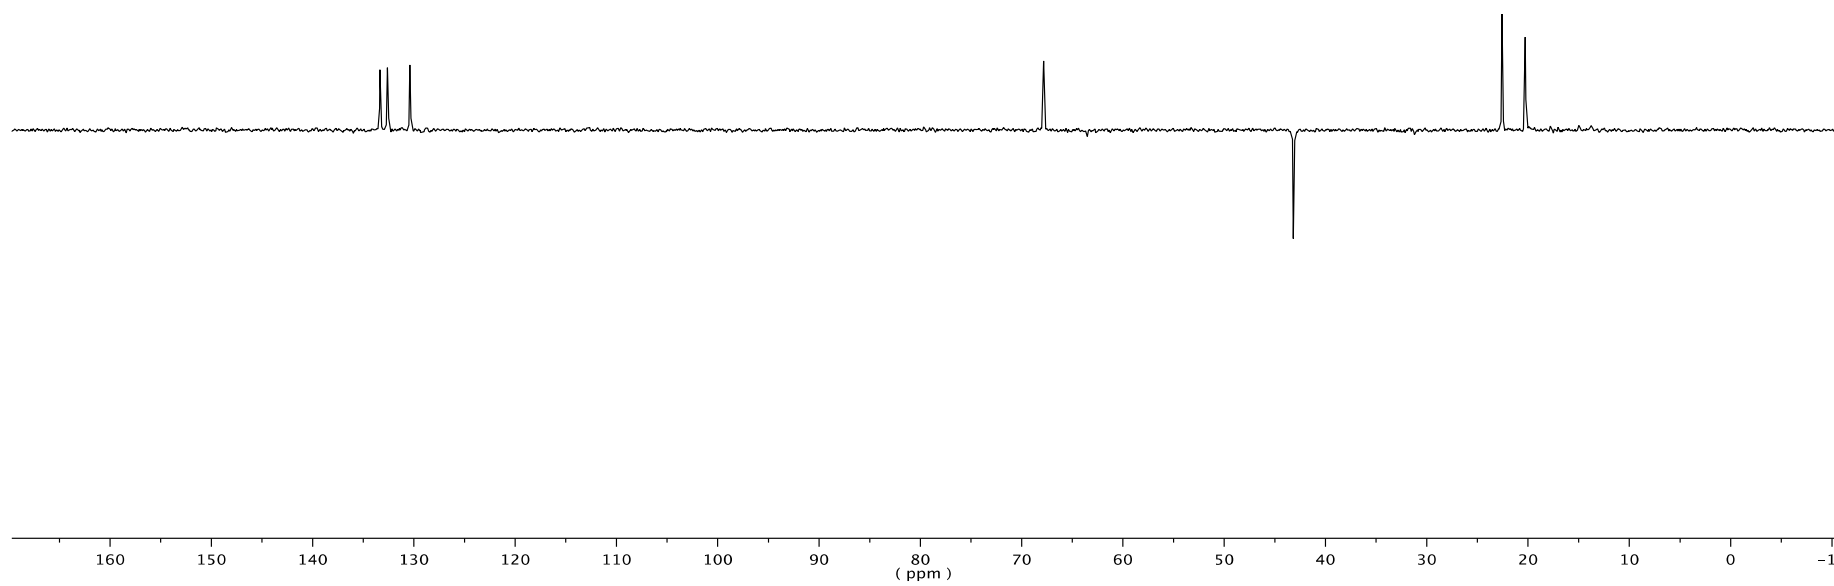

S11

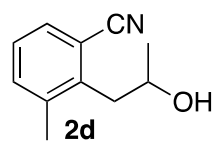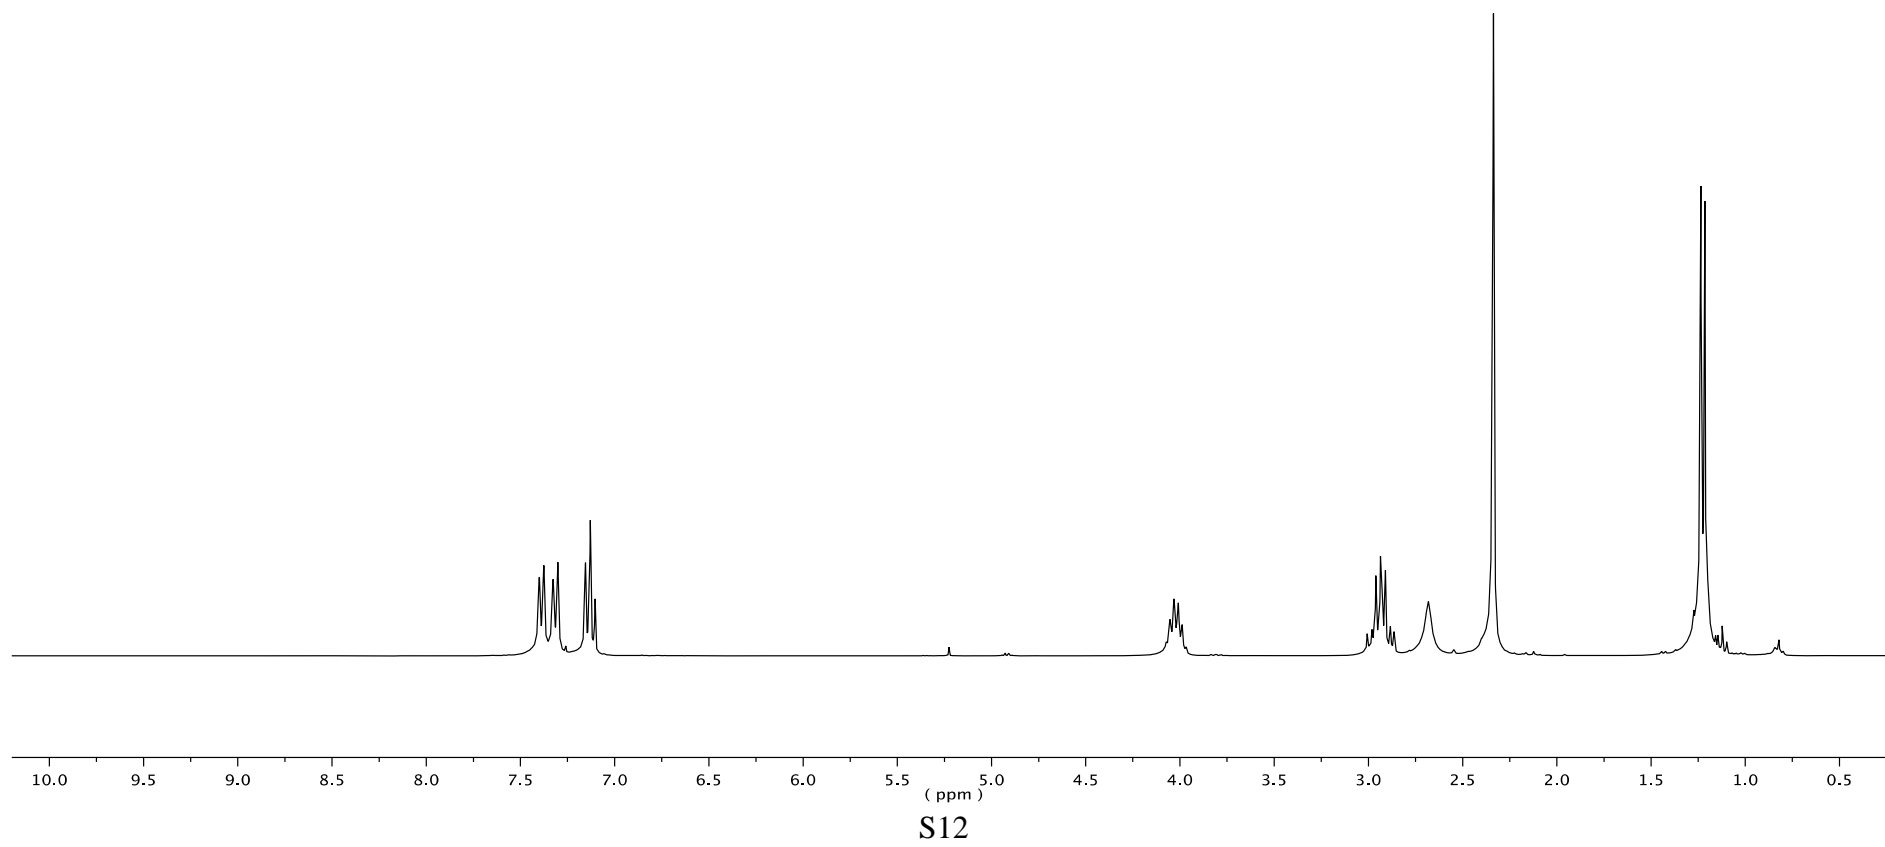

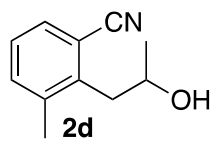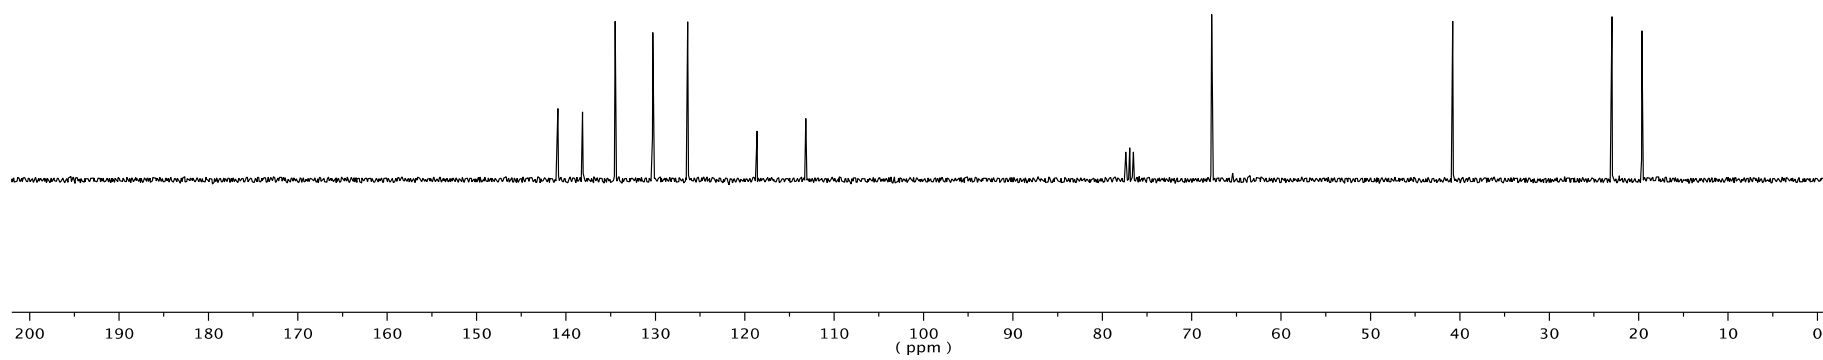

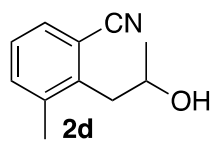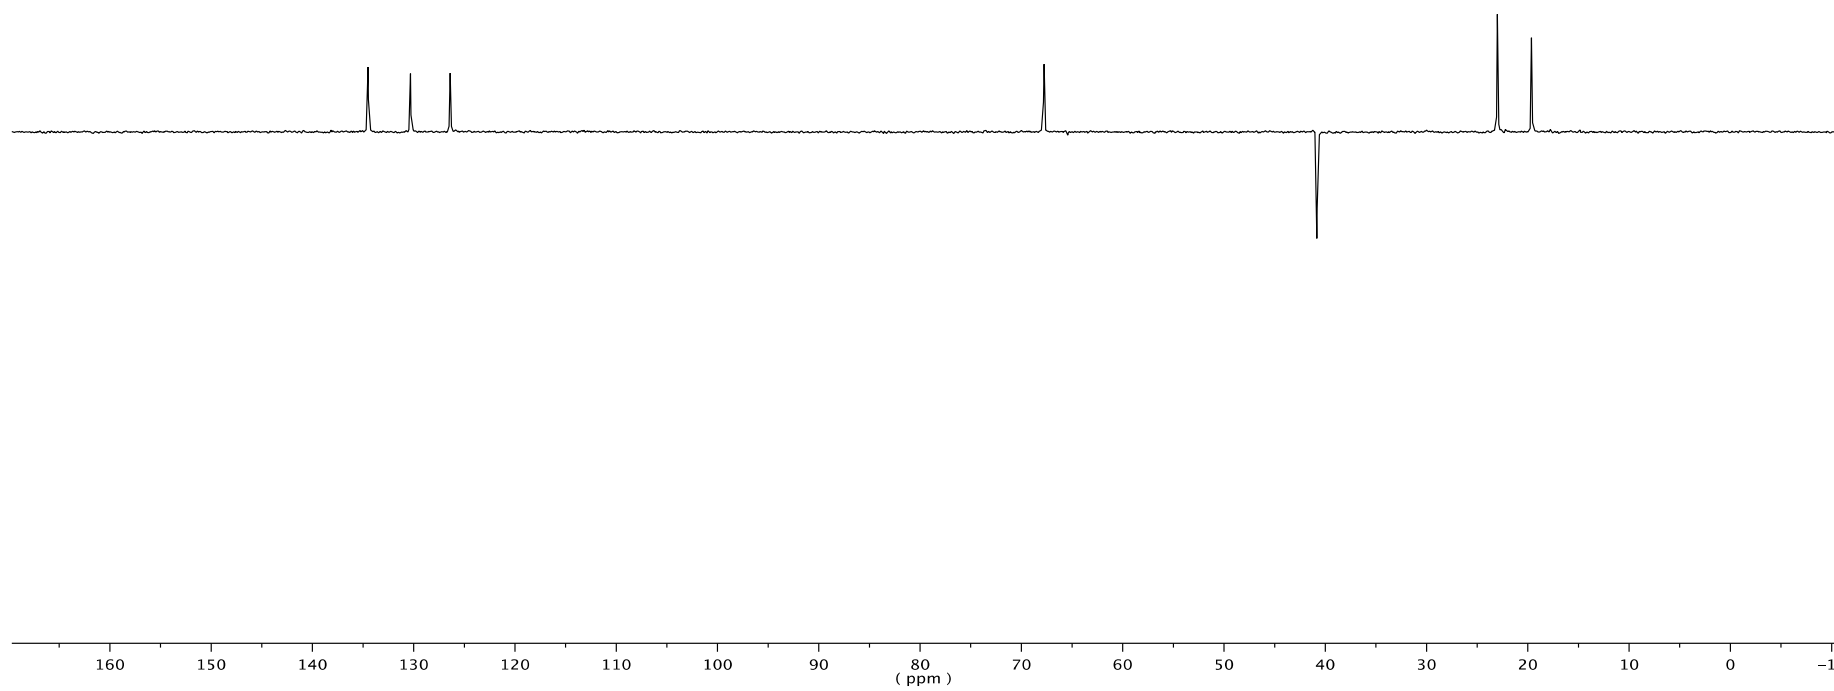

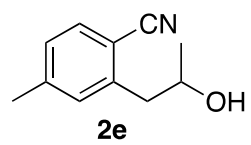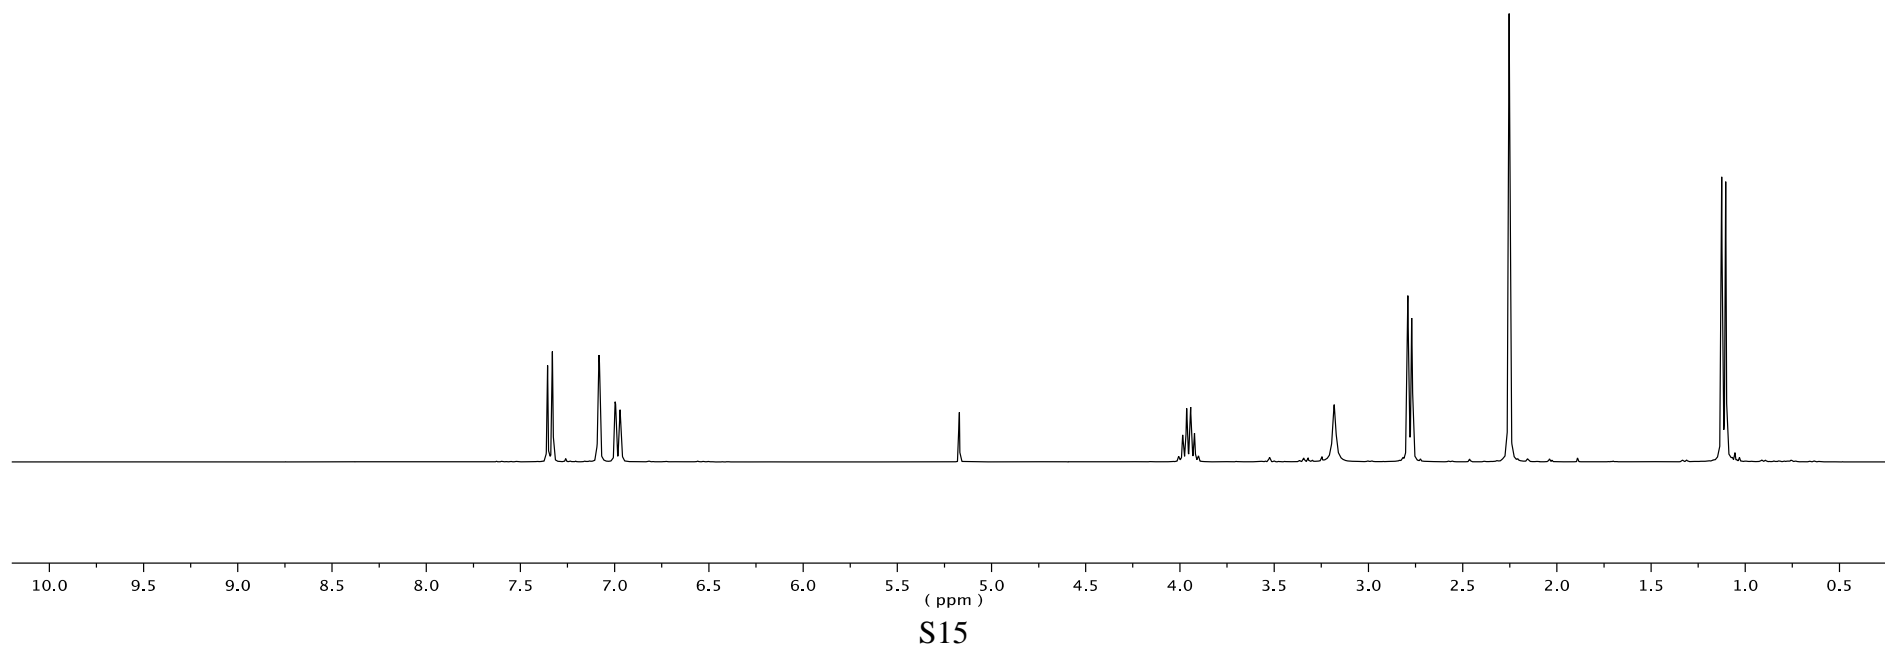

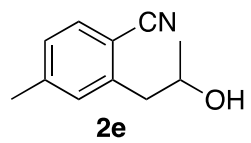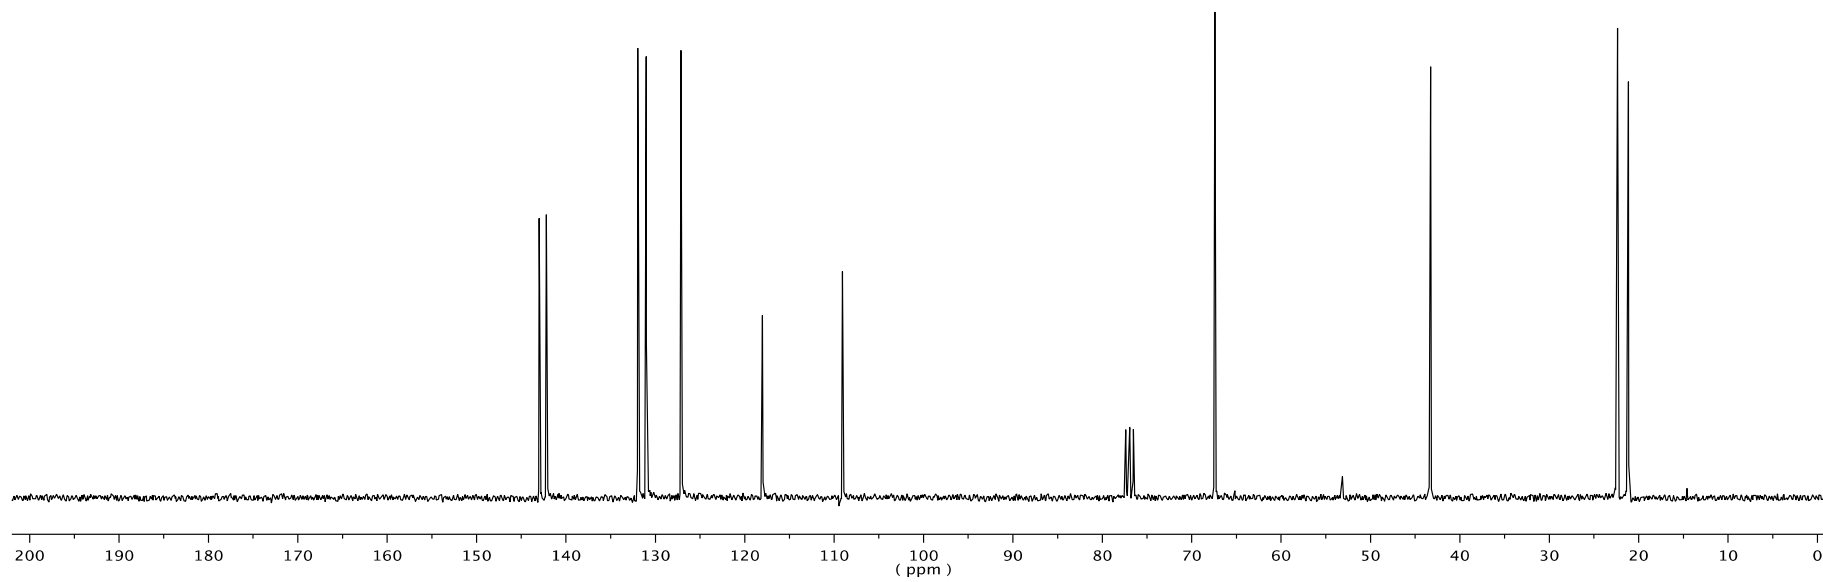



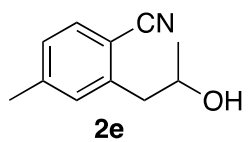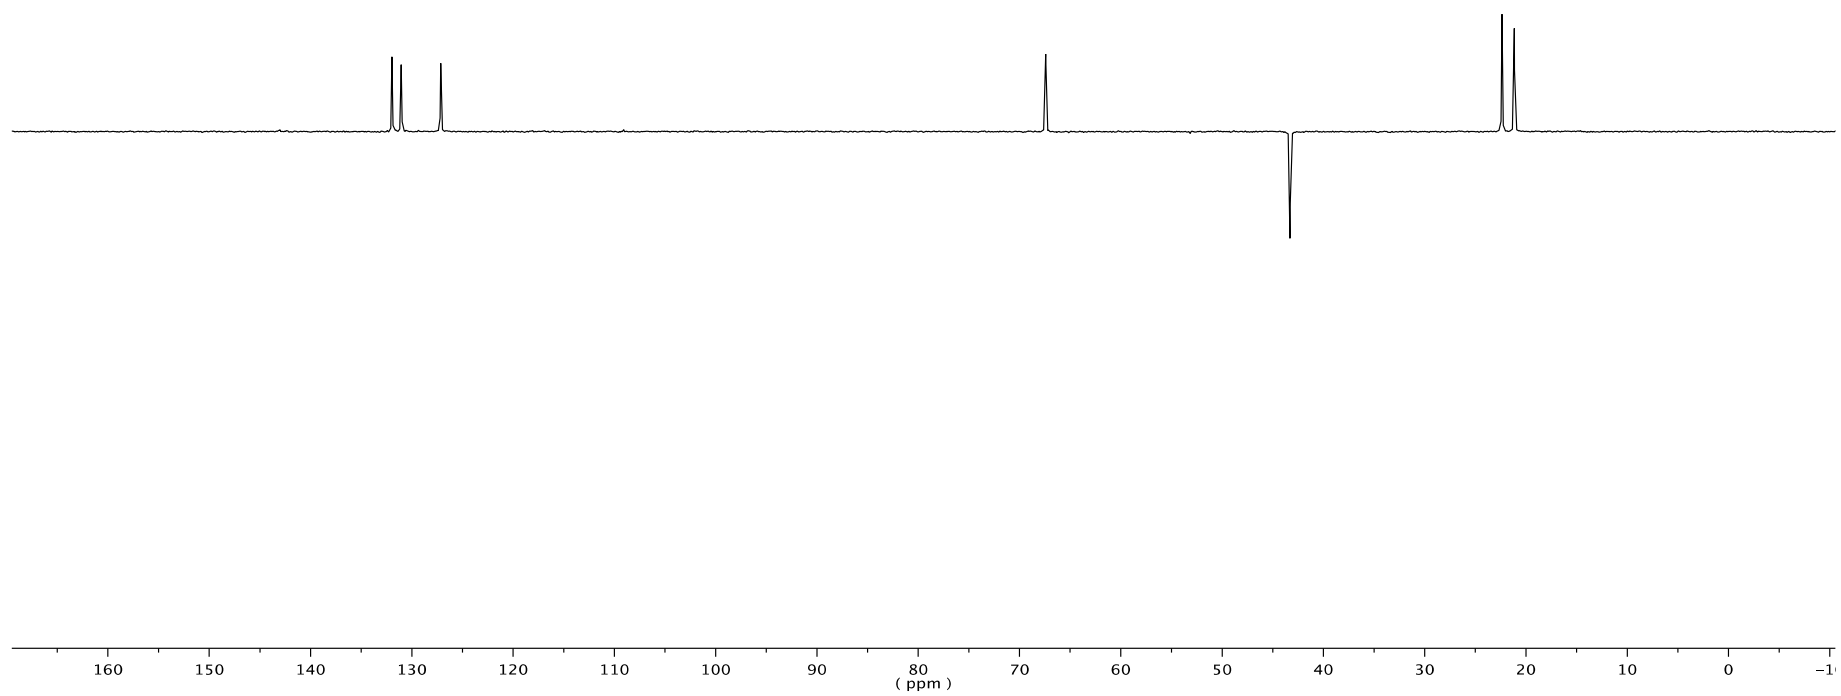

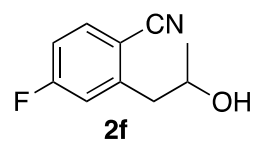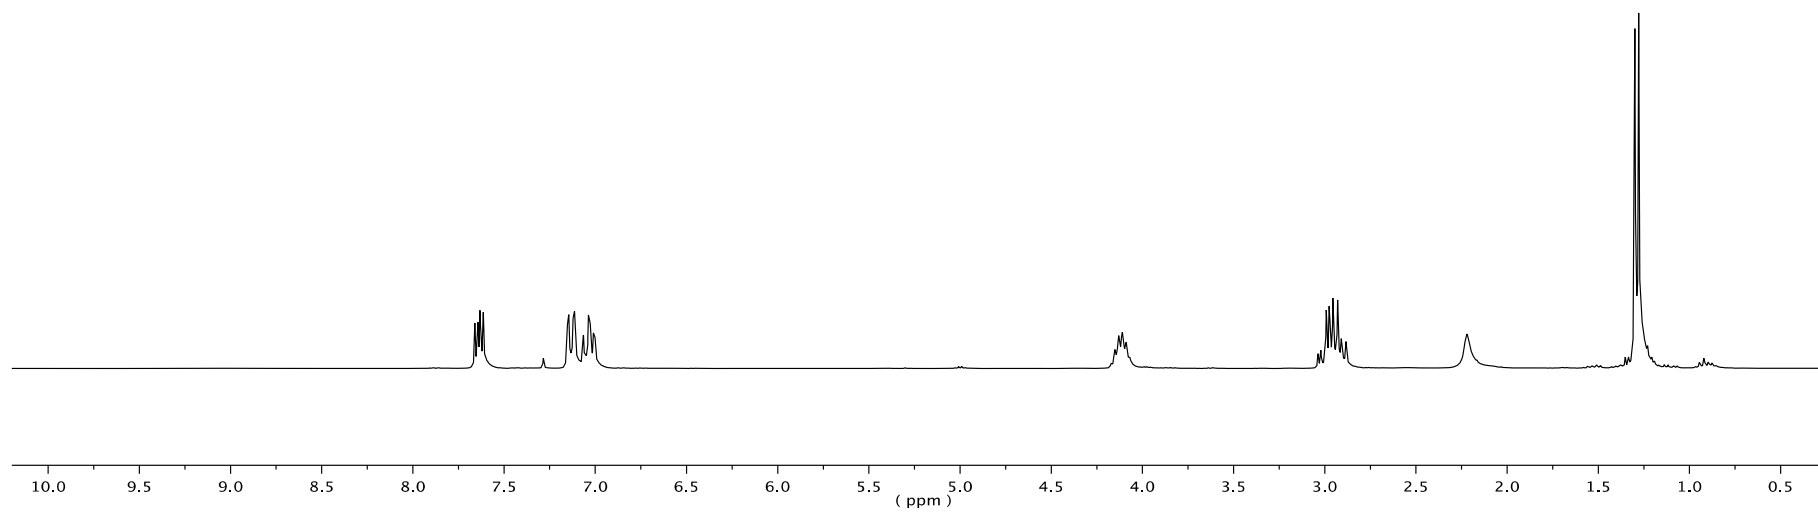

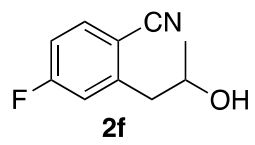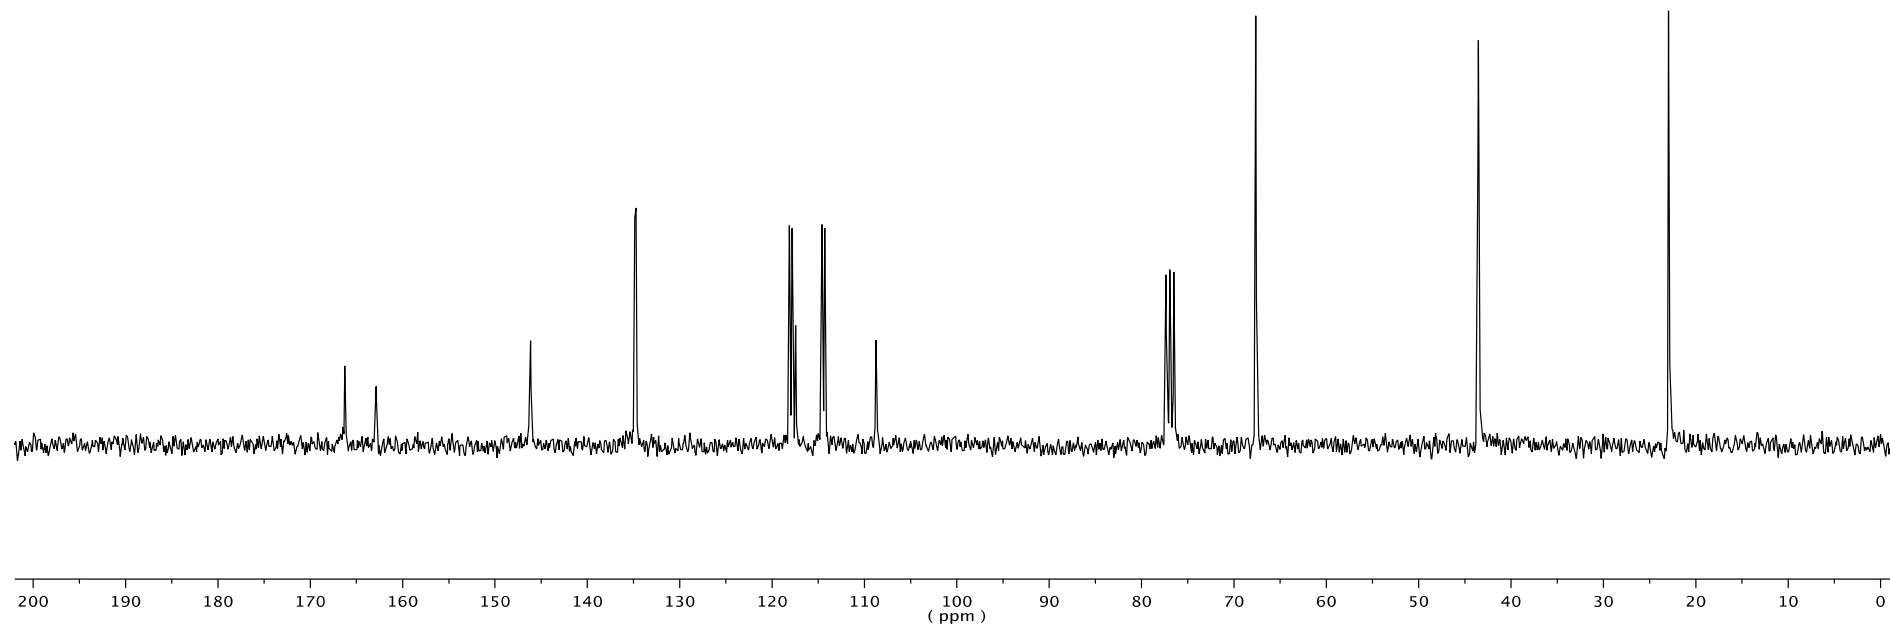

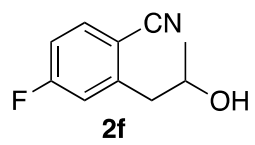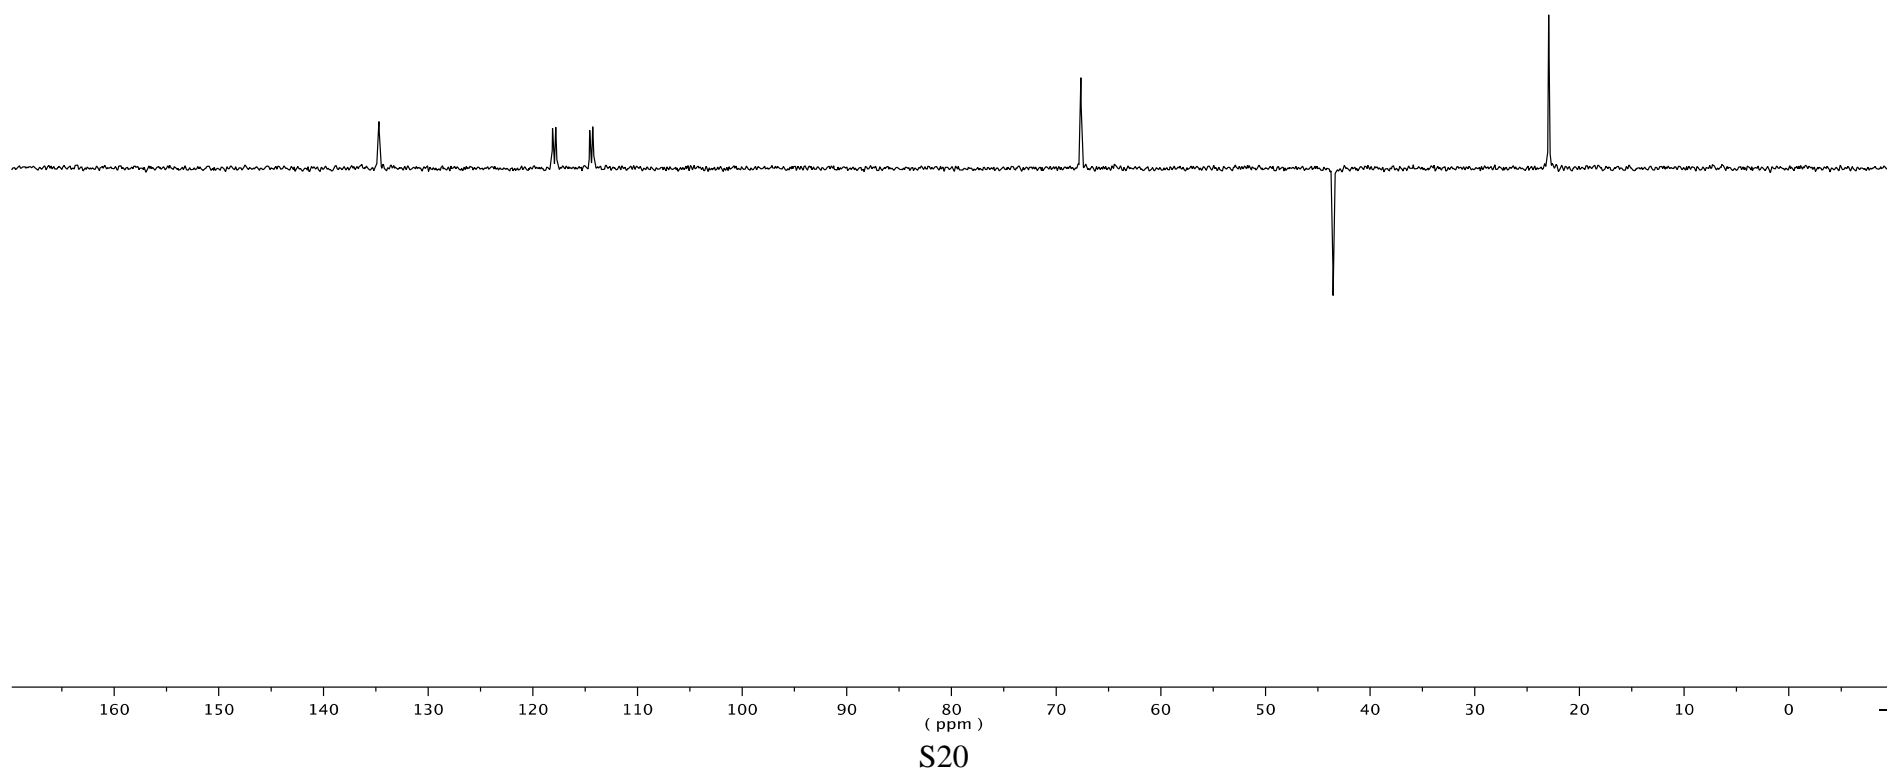

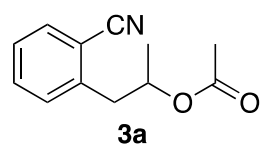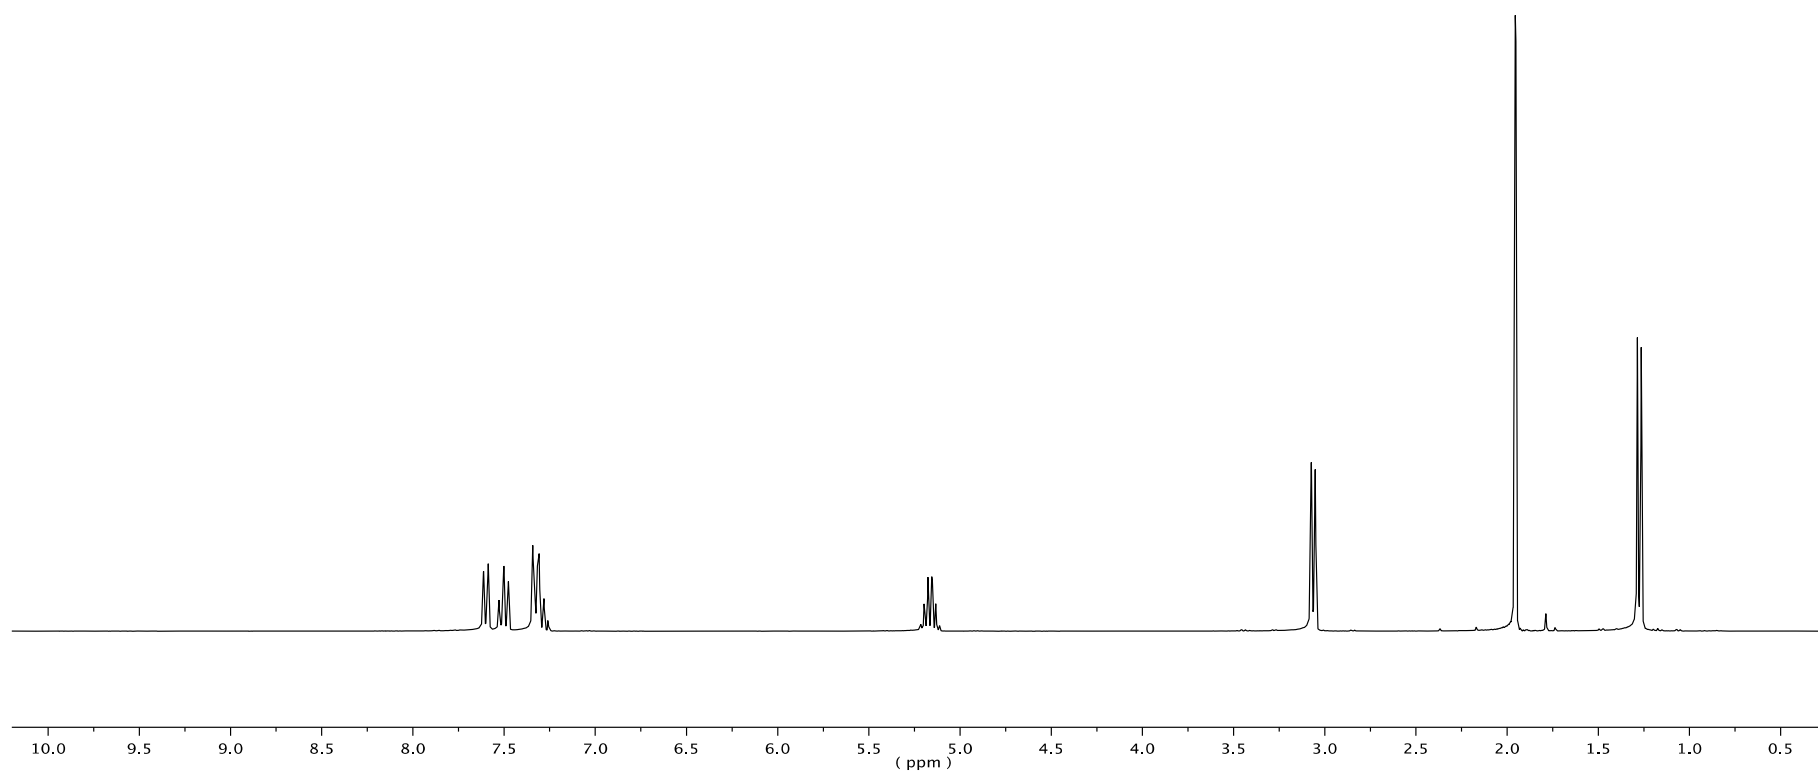

S21

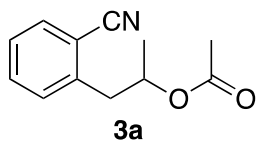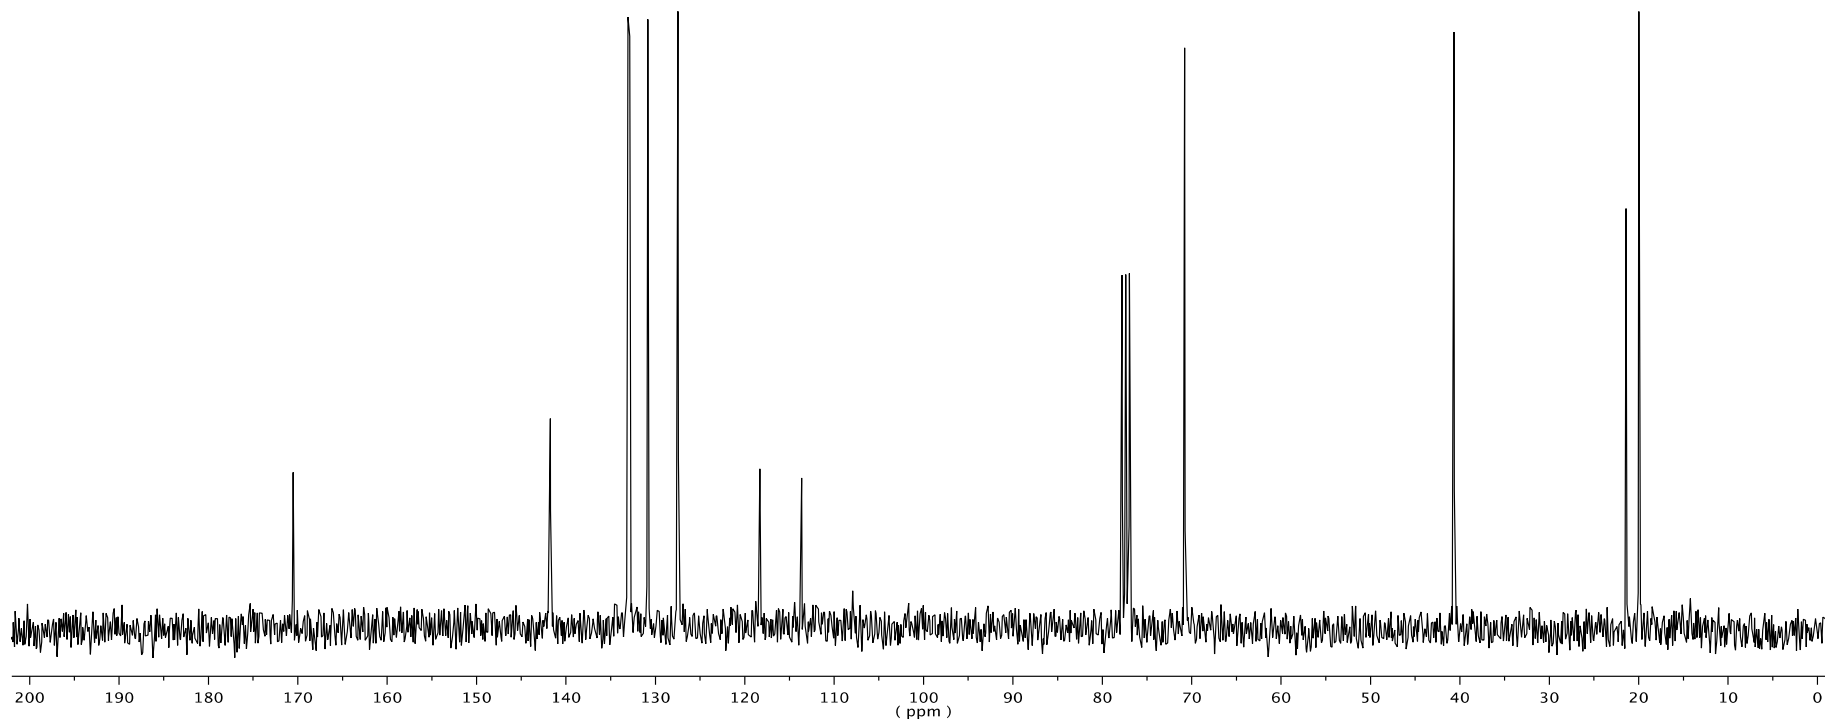

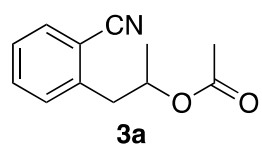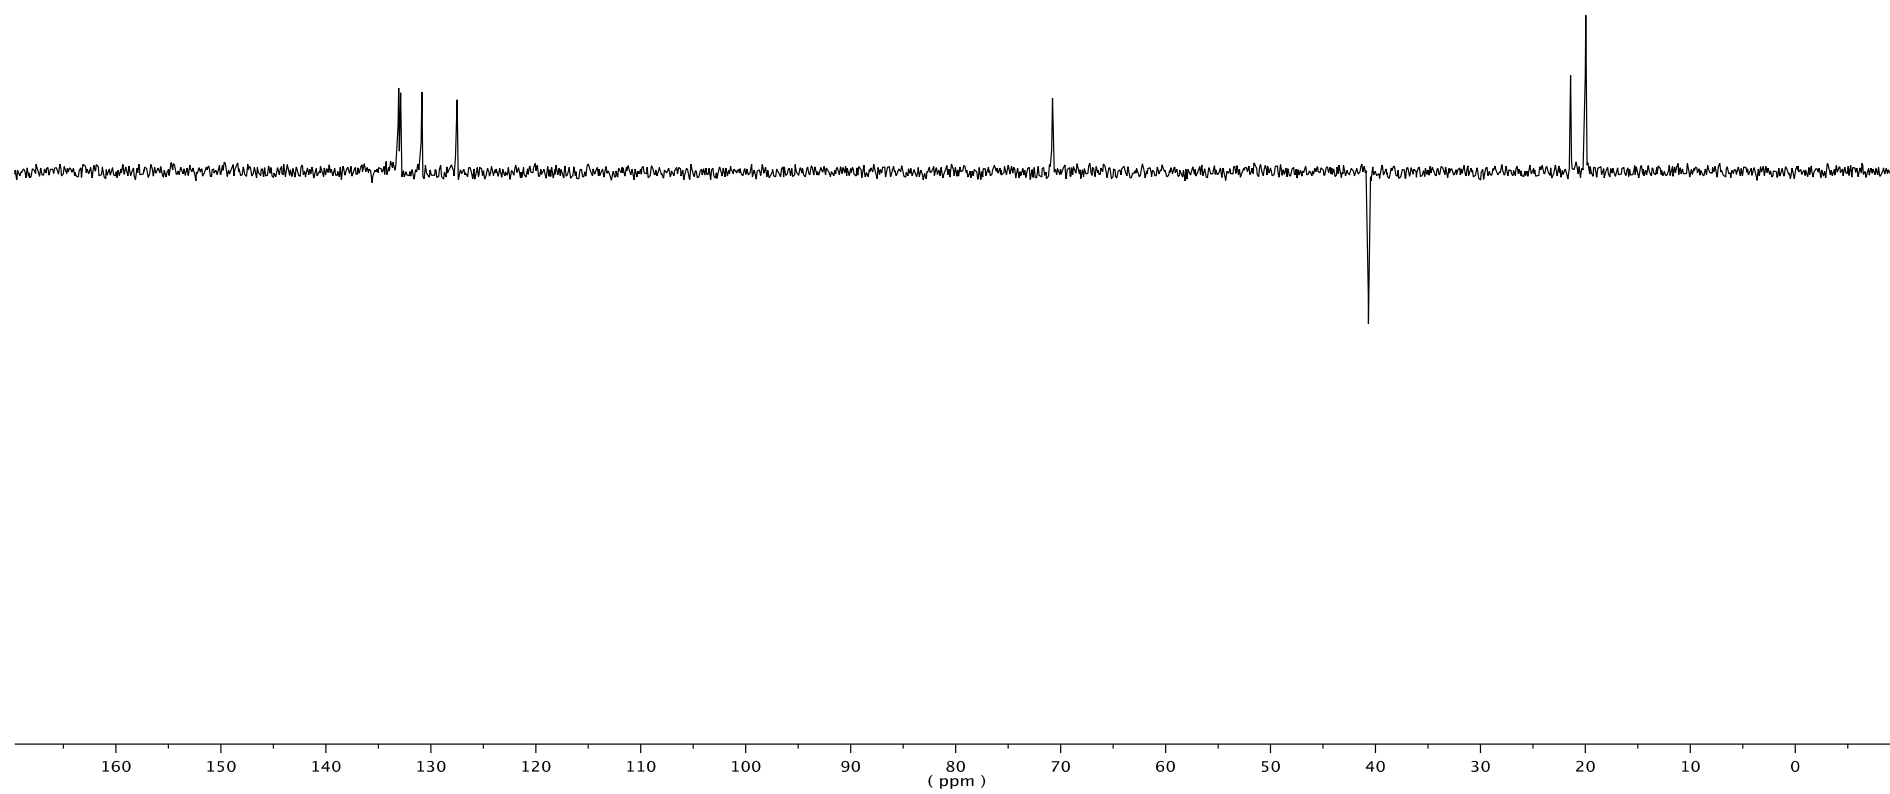

S23

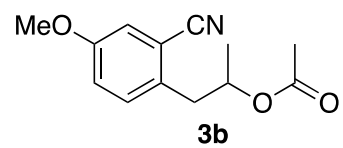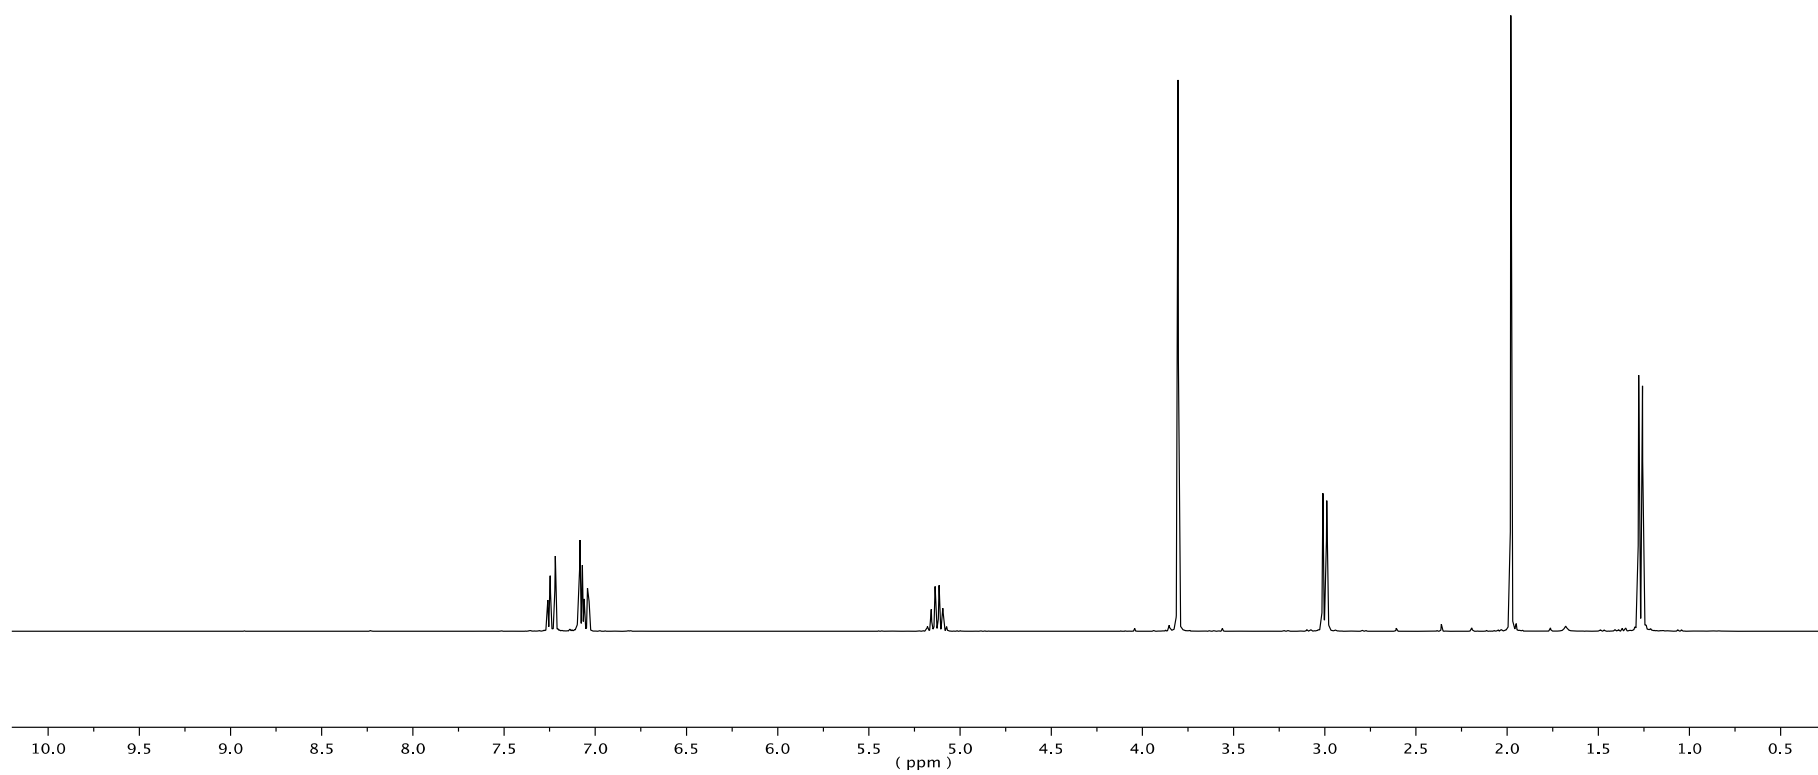

S24



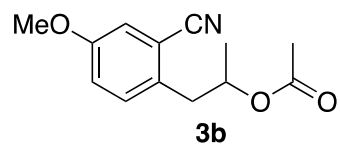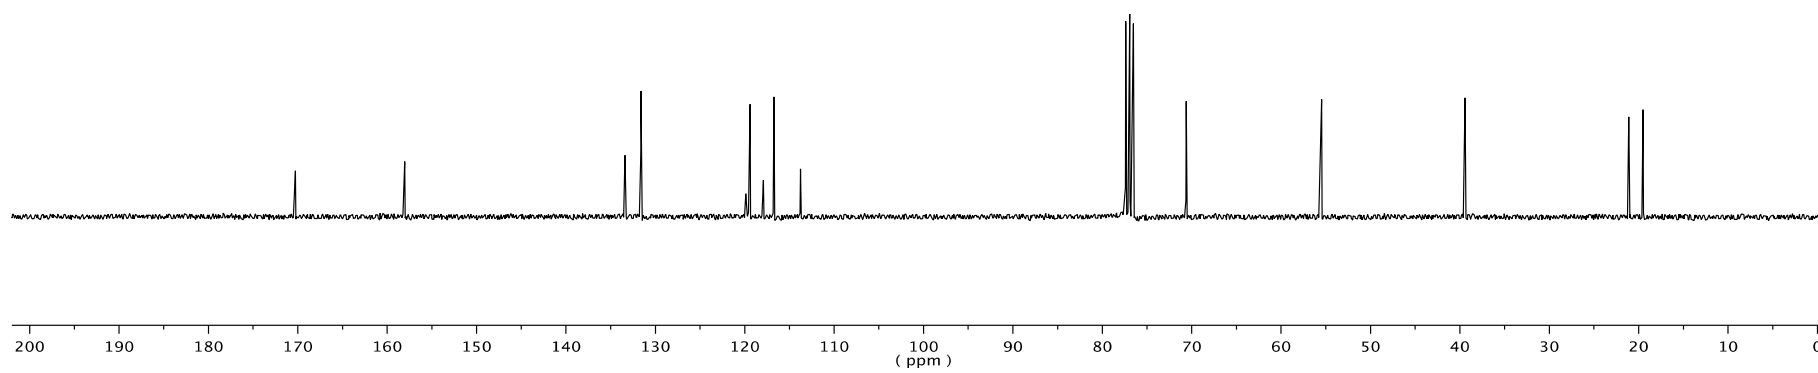

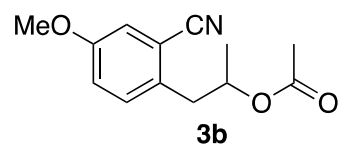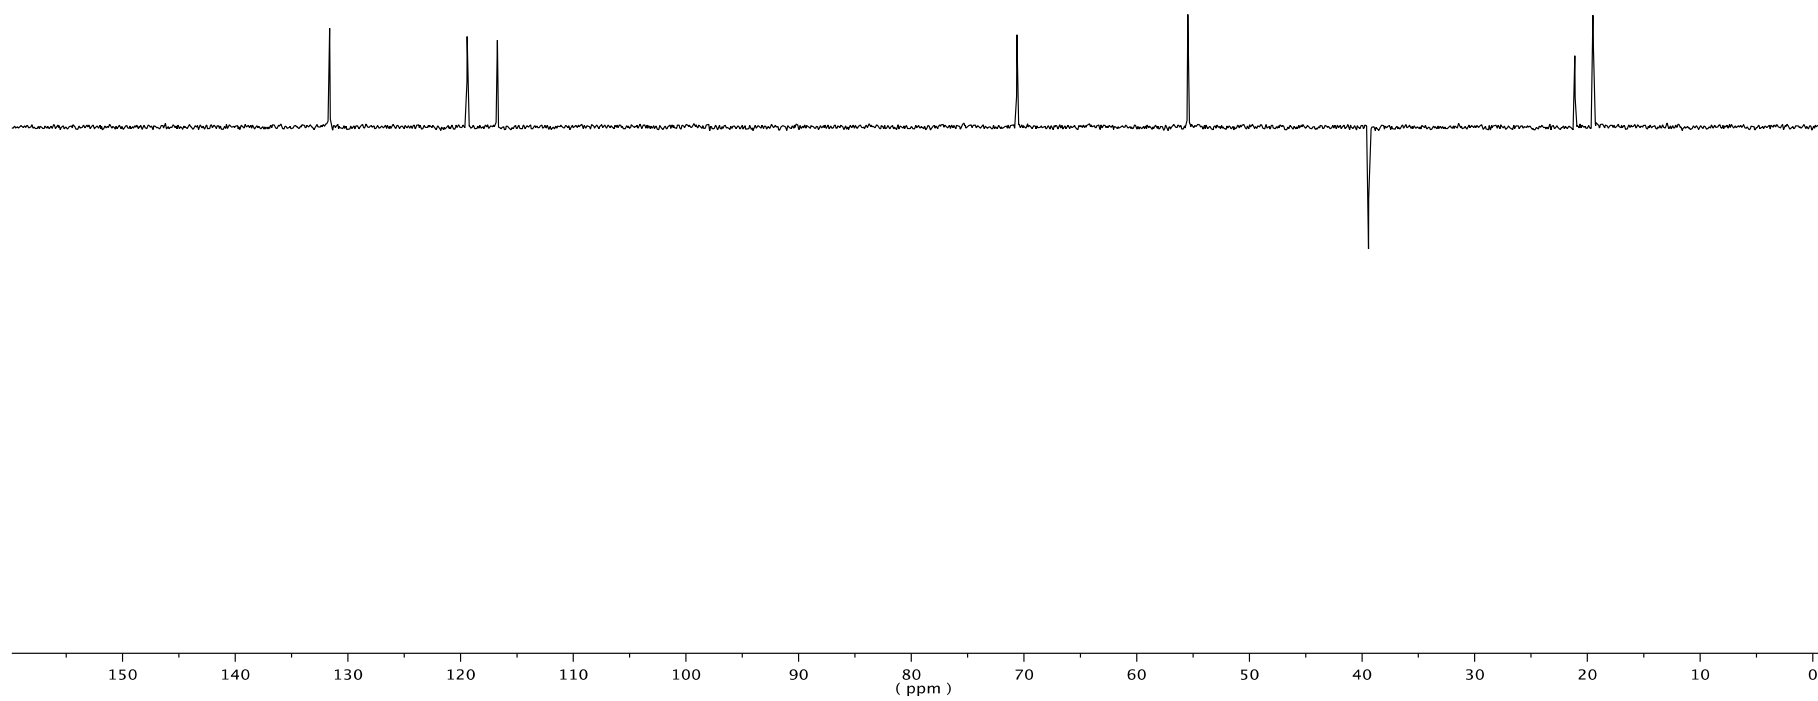

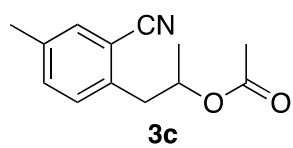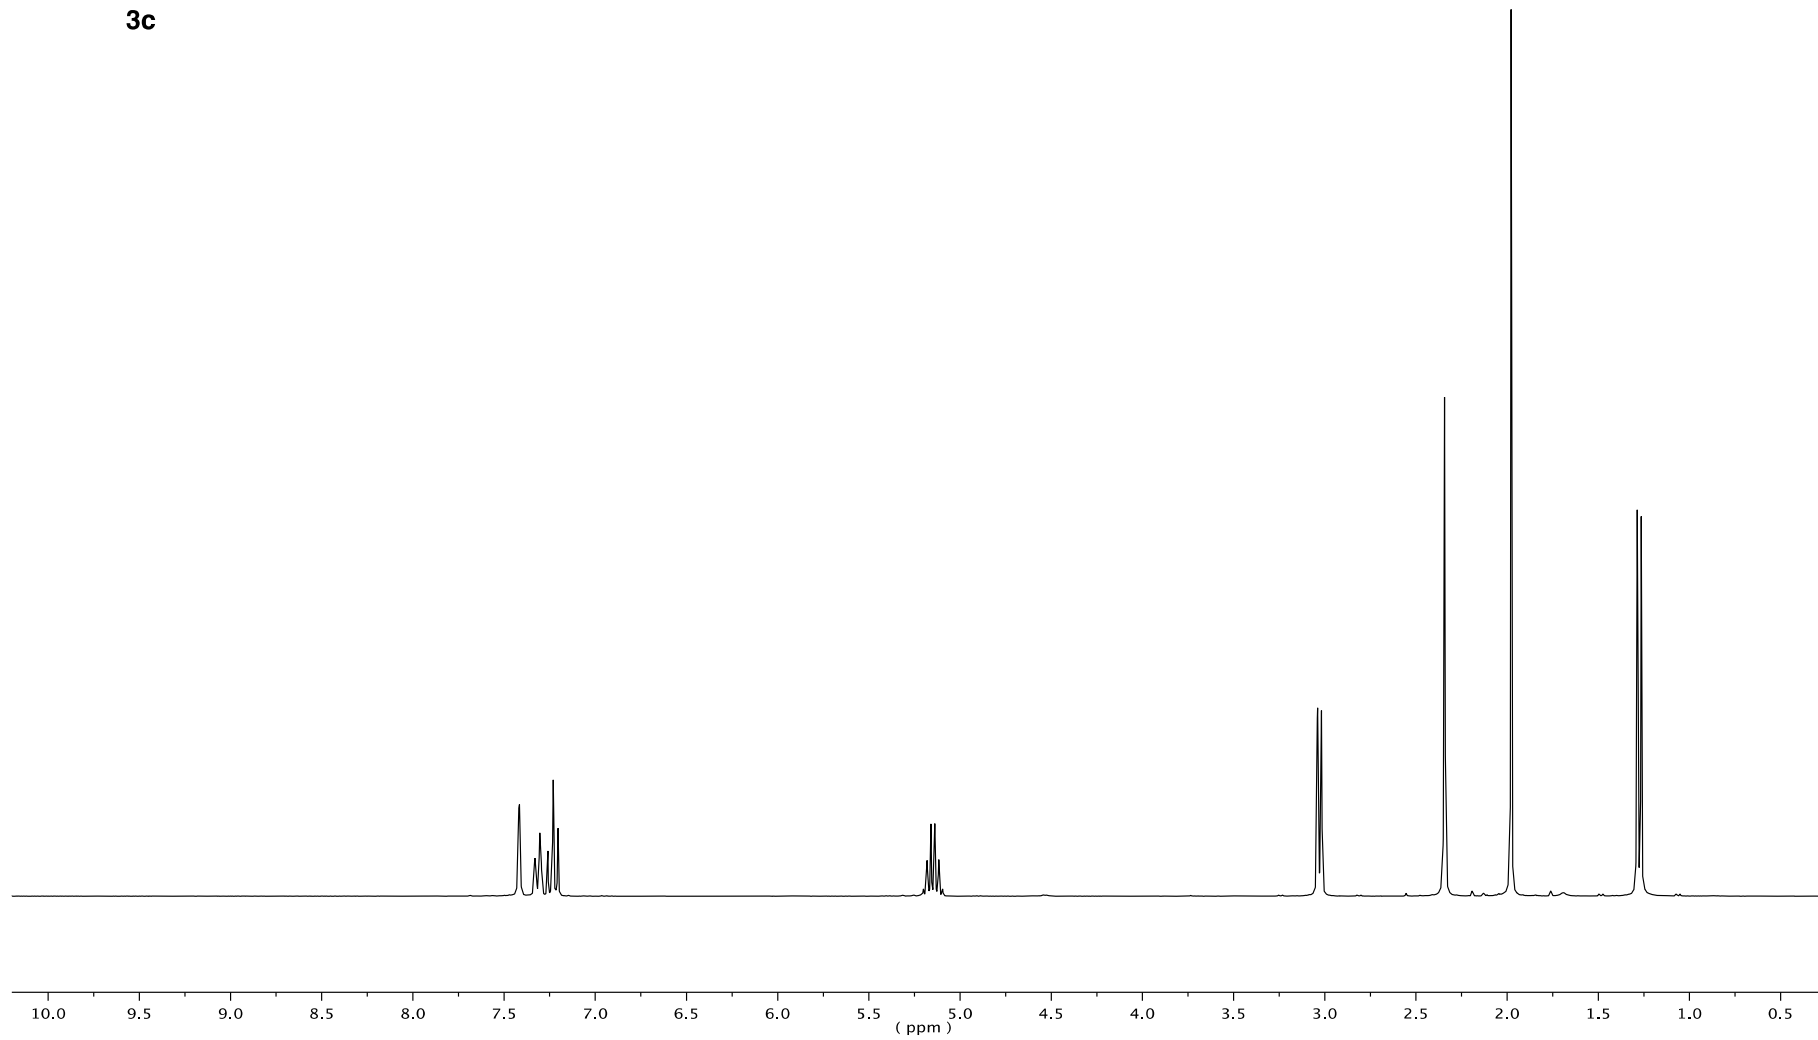

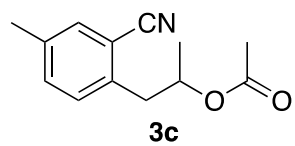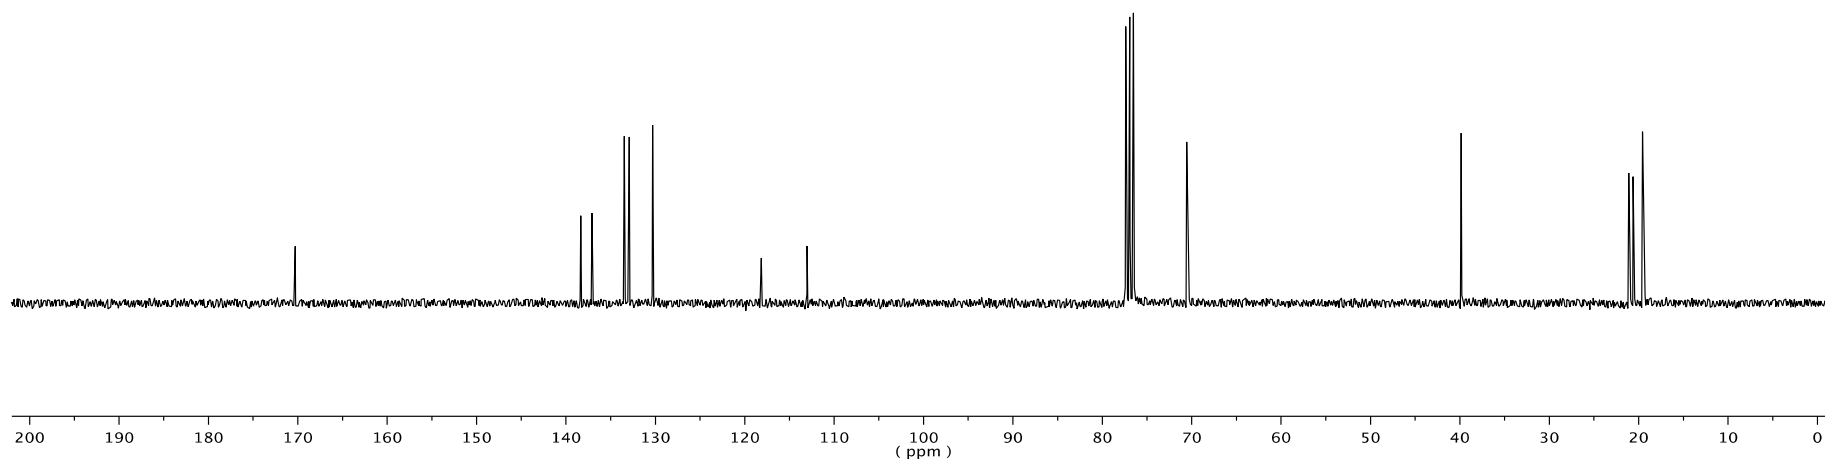

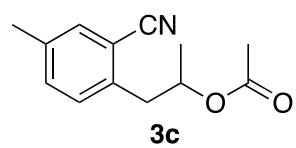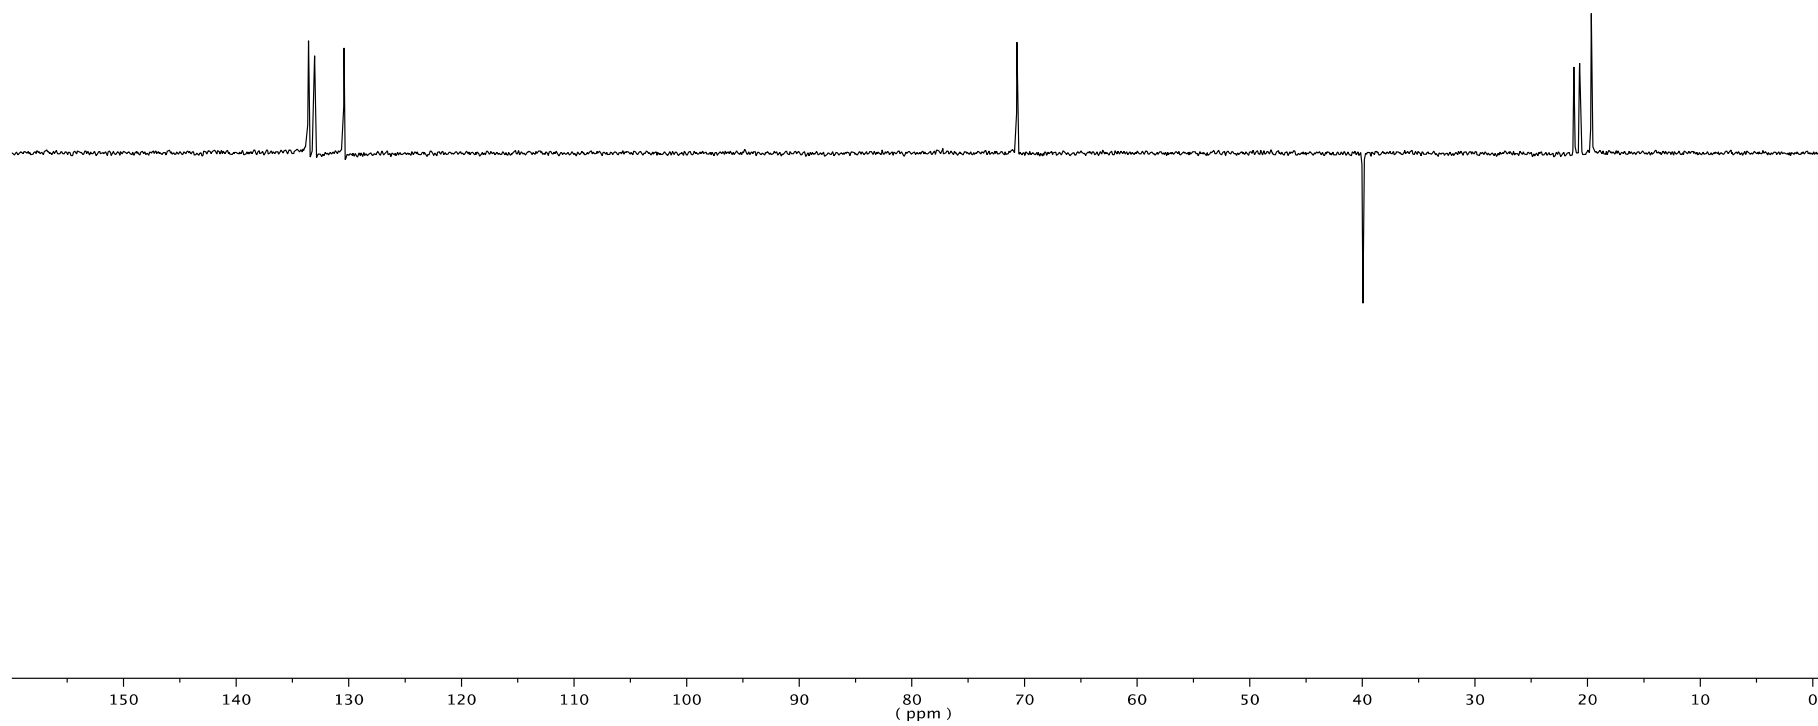

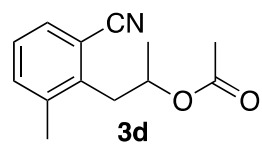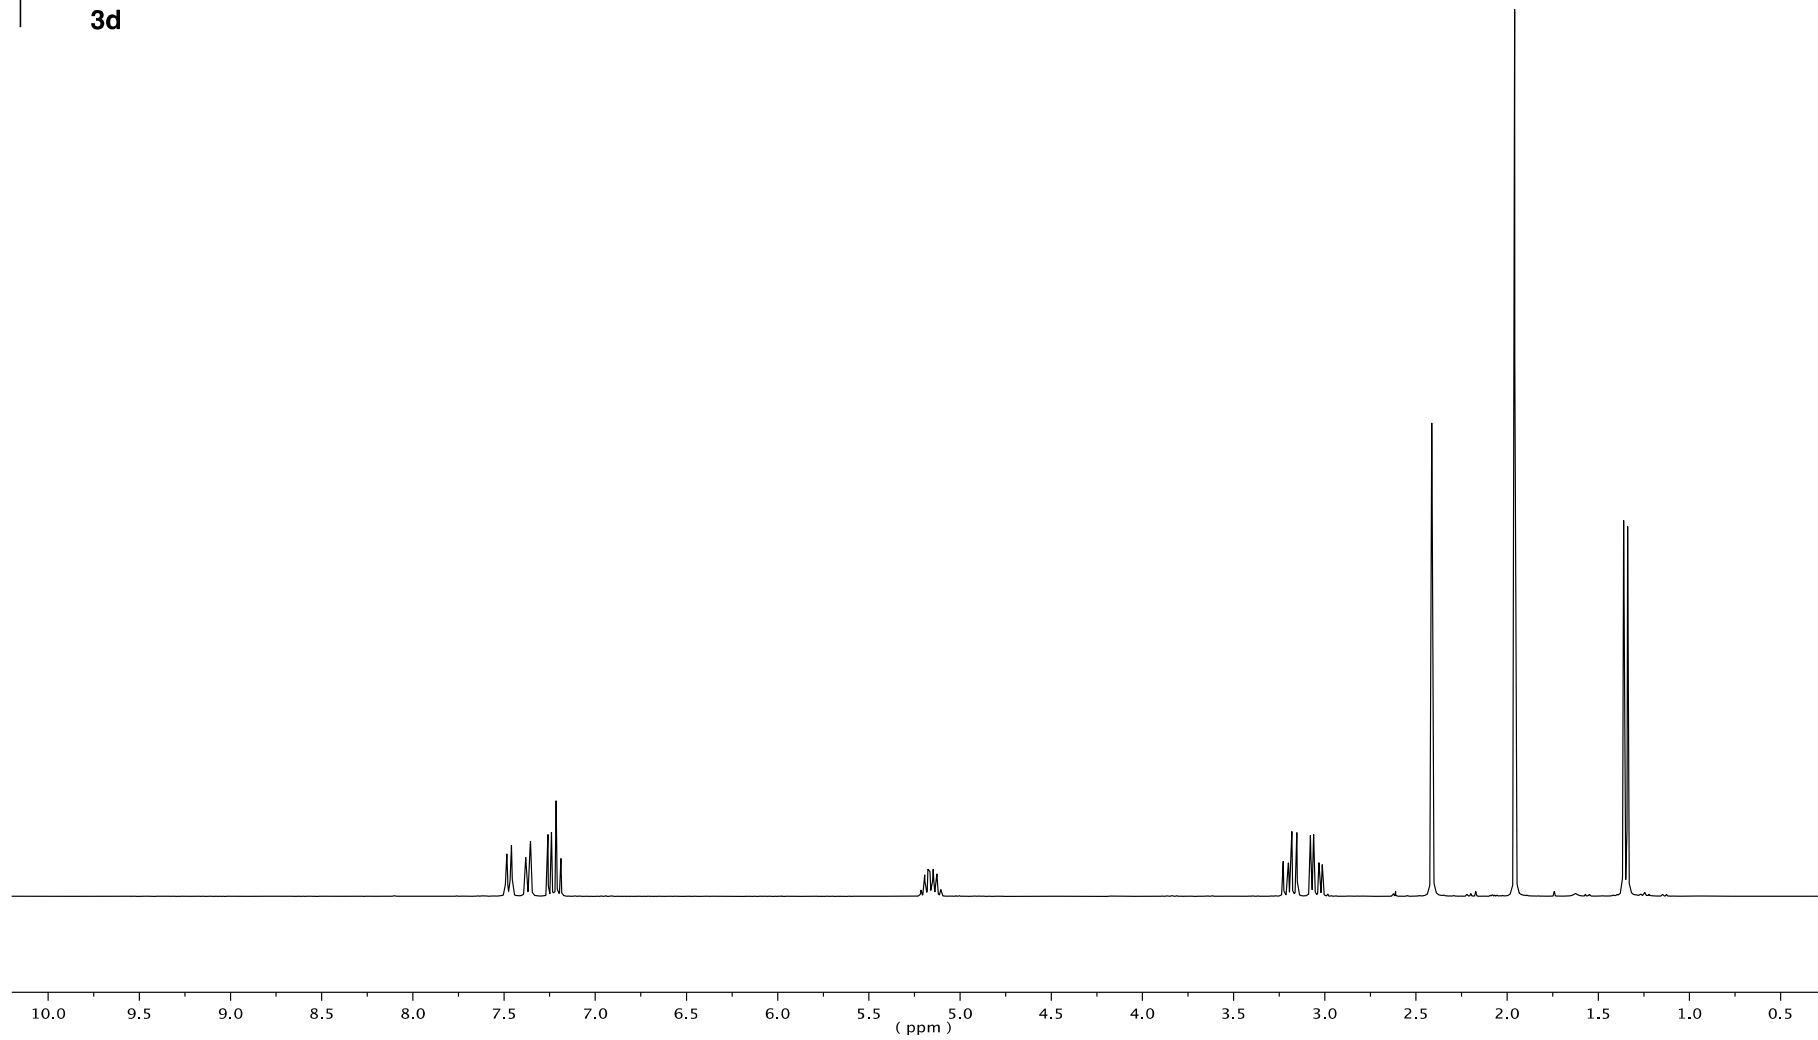

S30

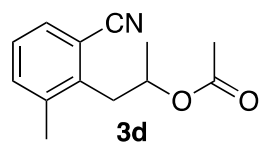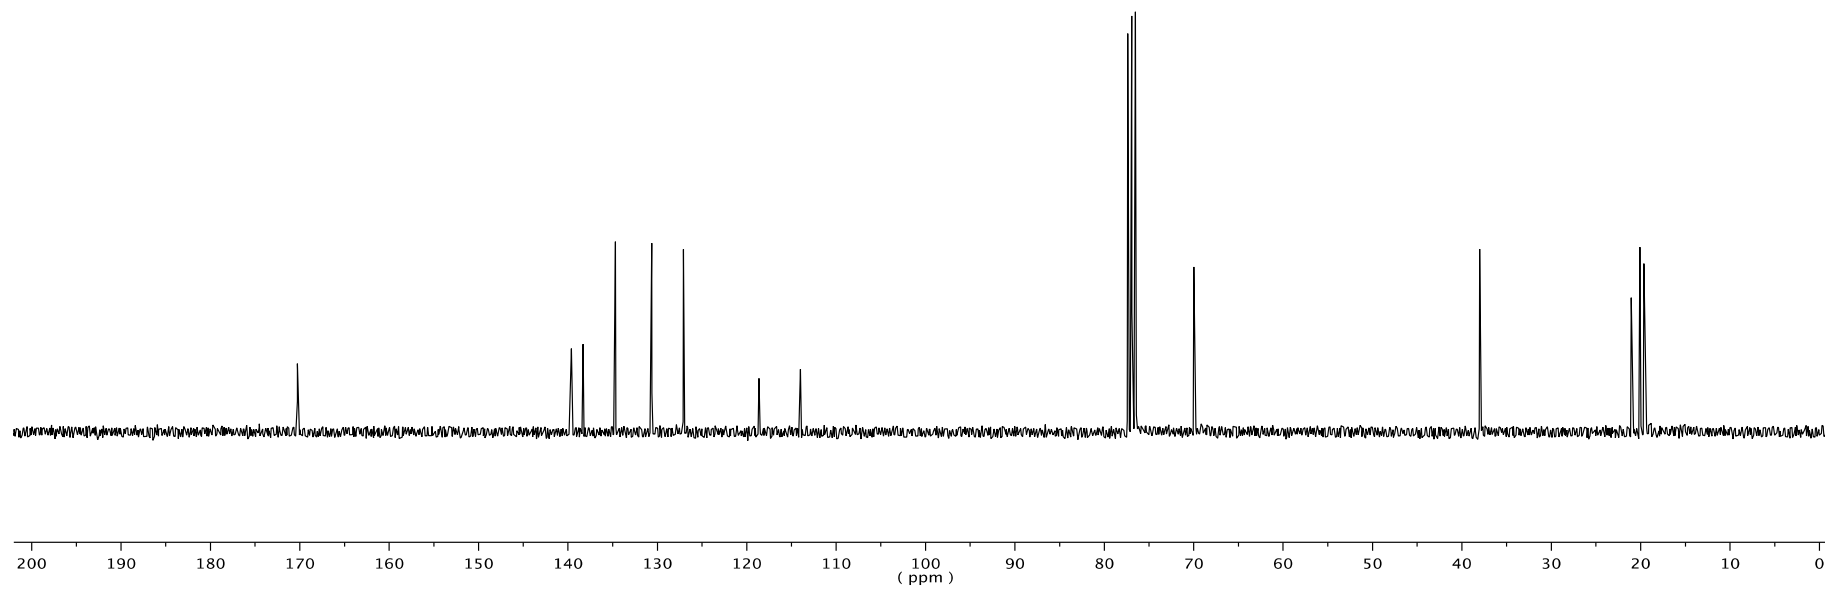

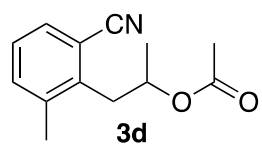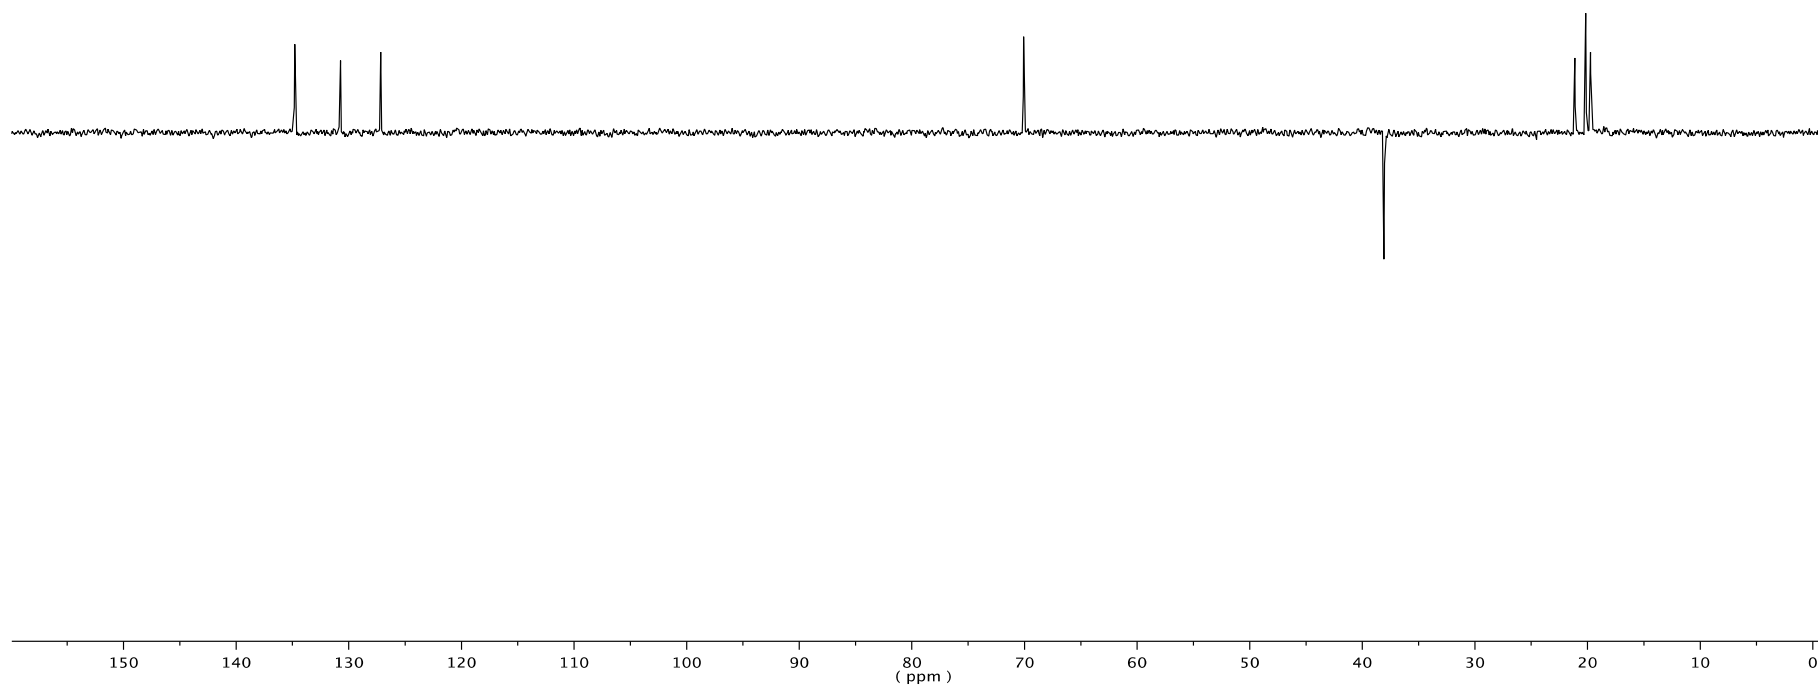



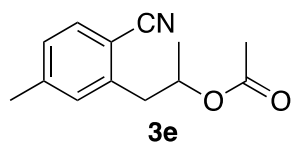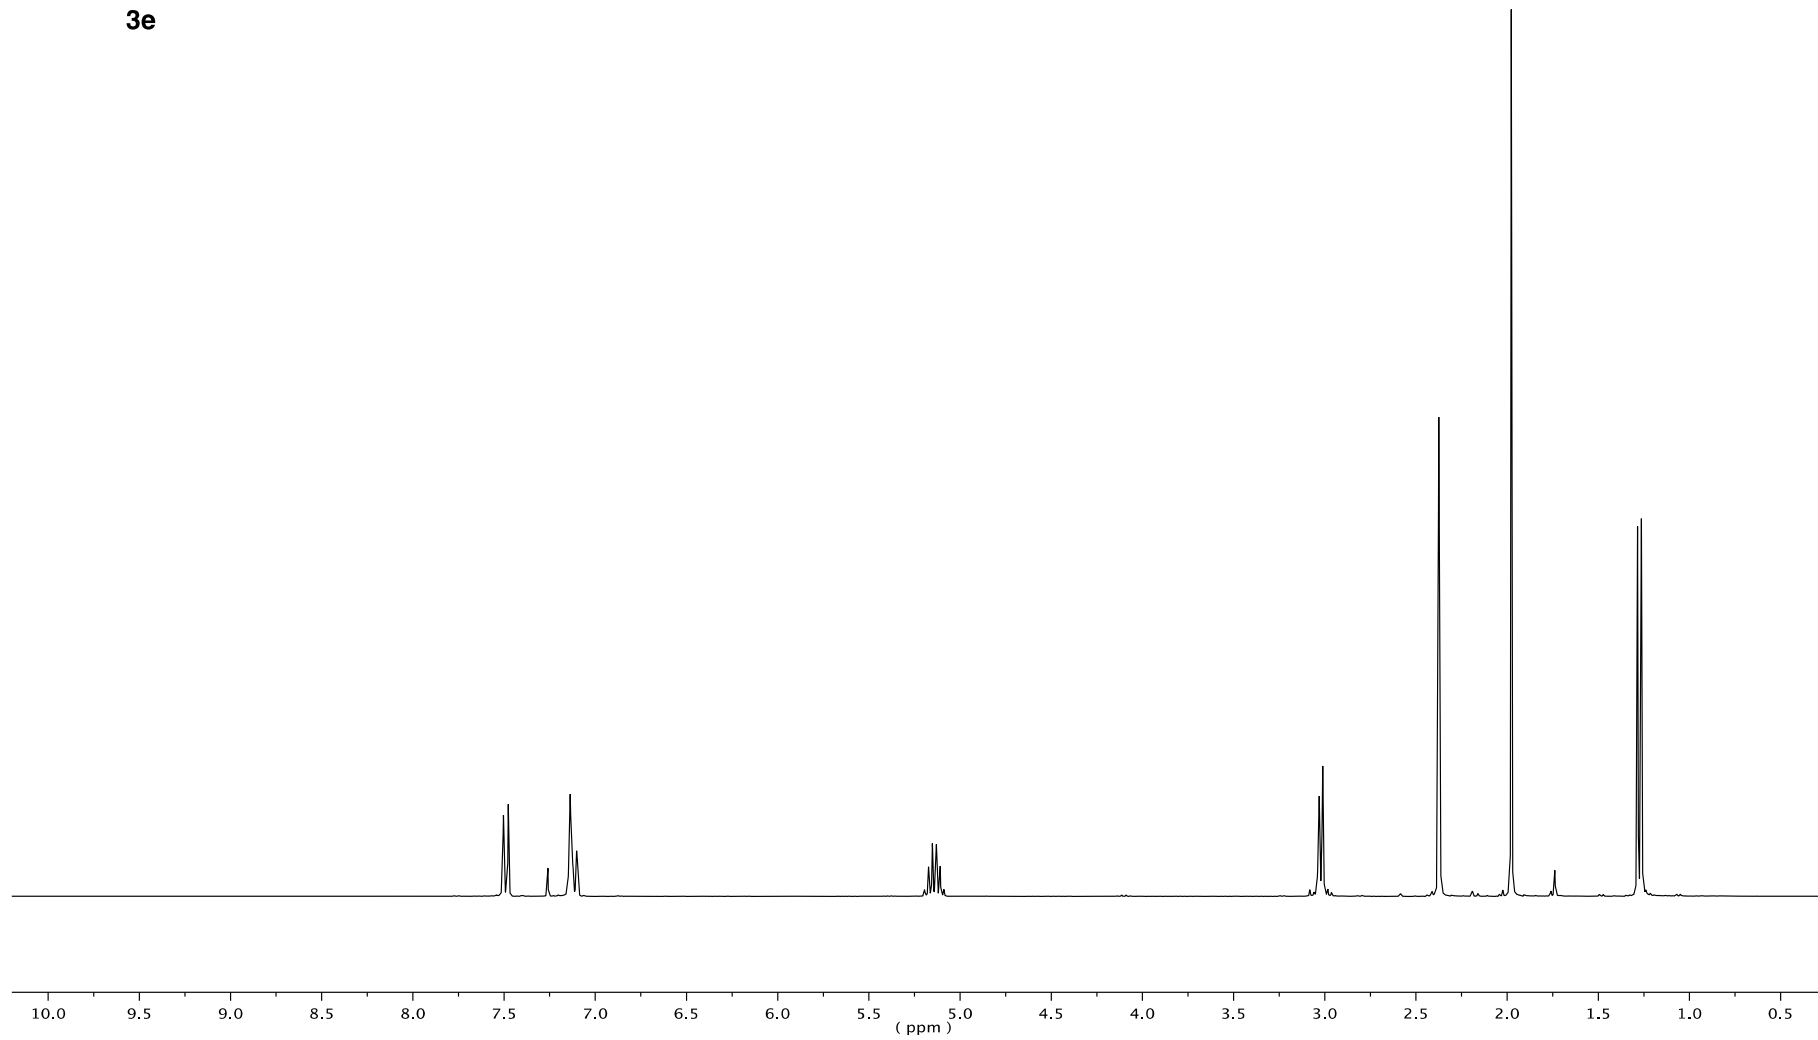

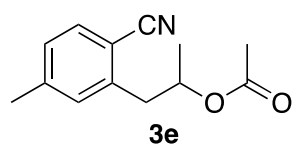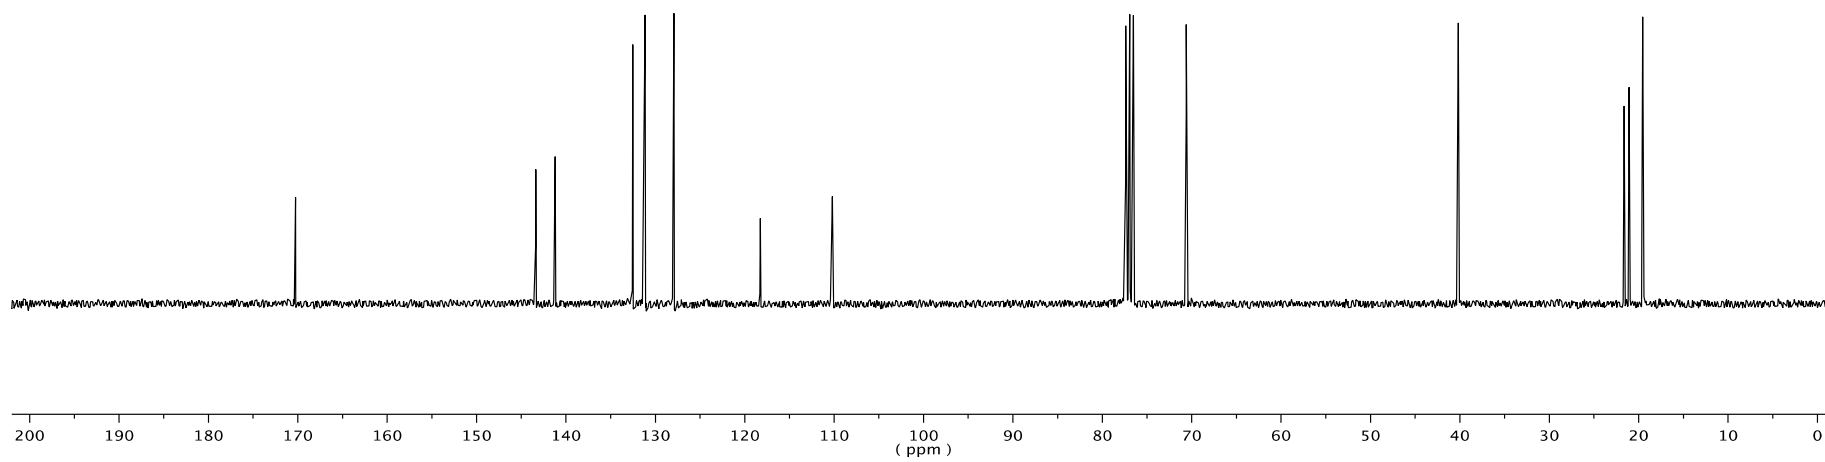

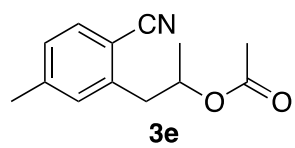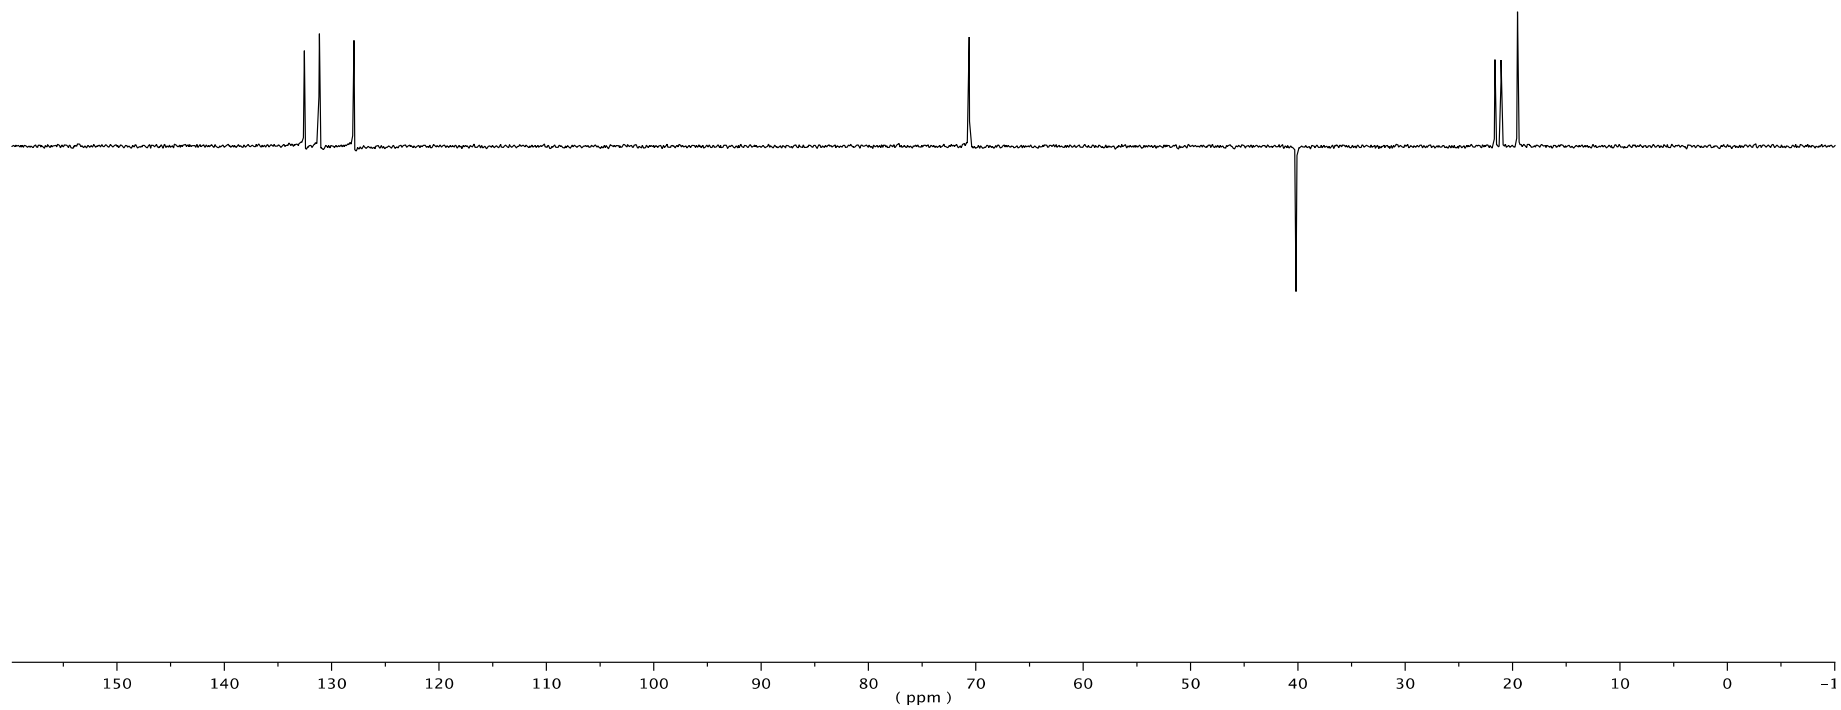

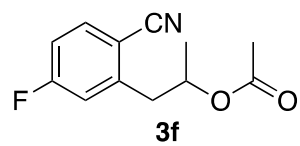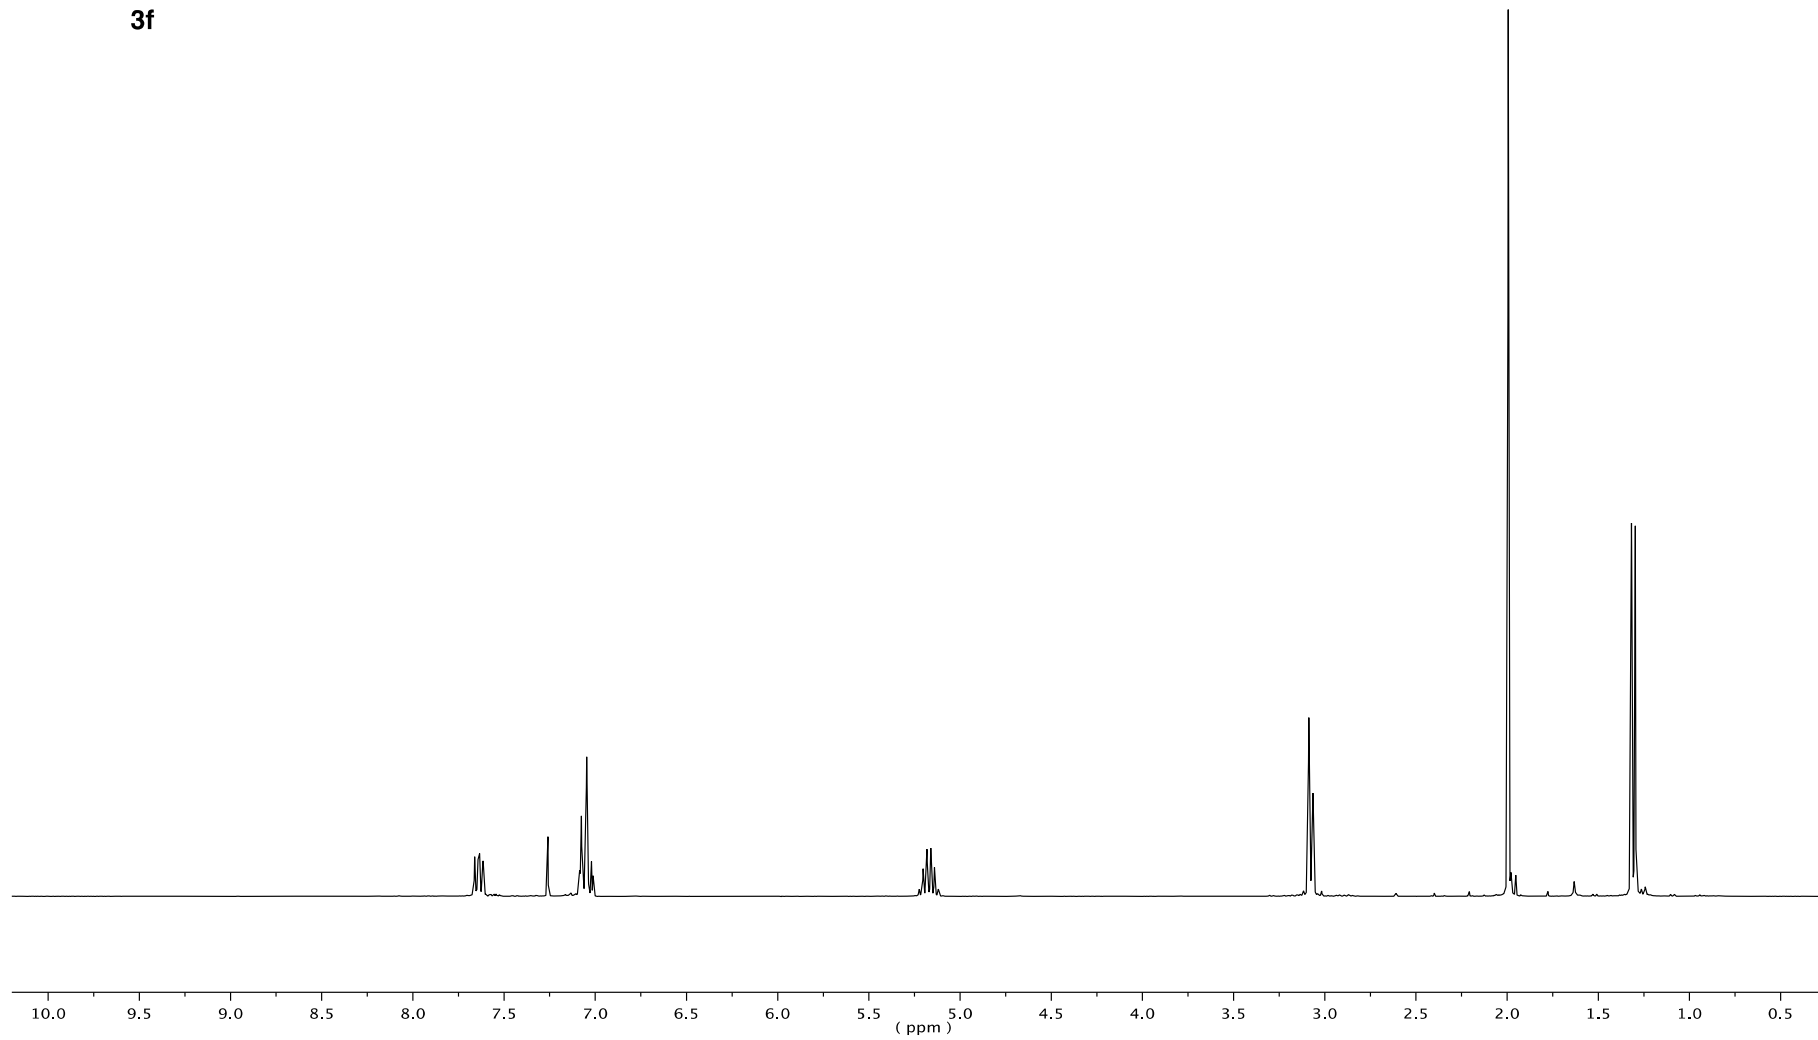

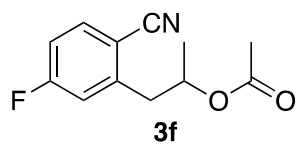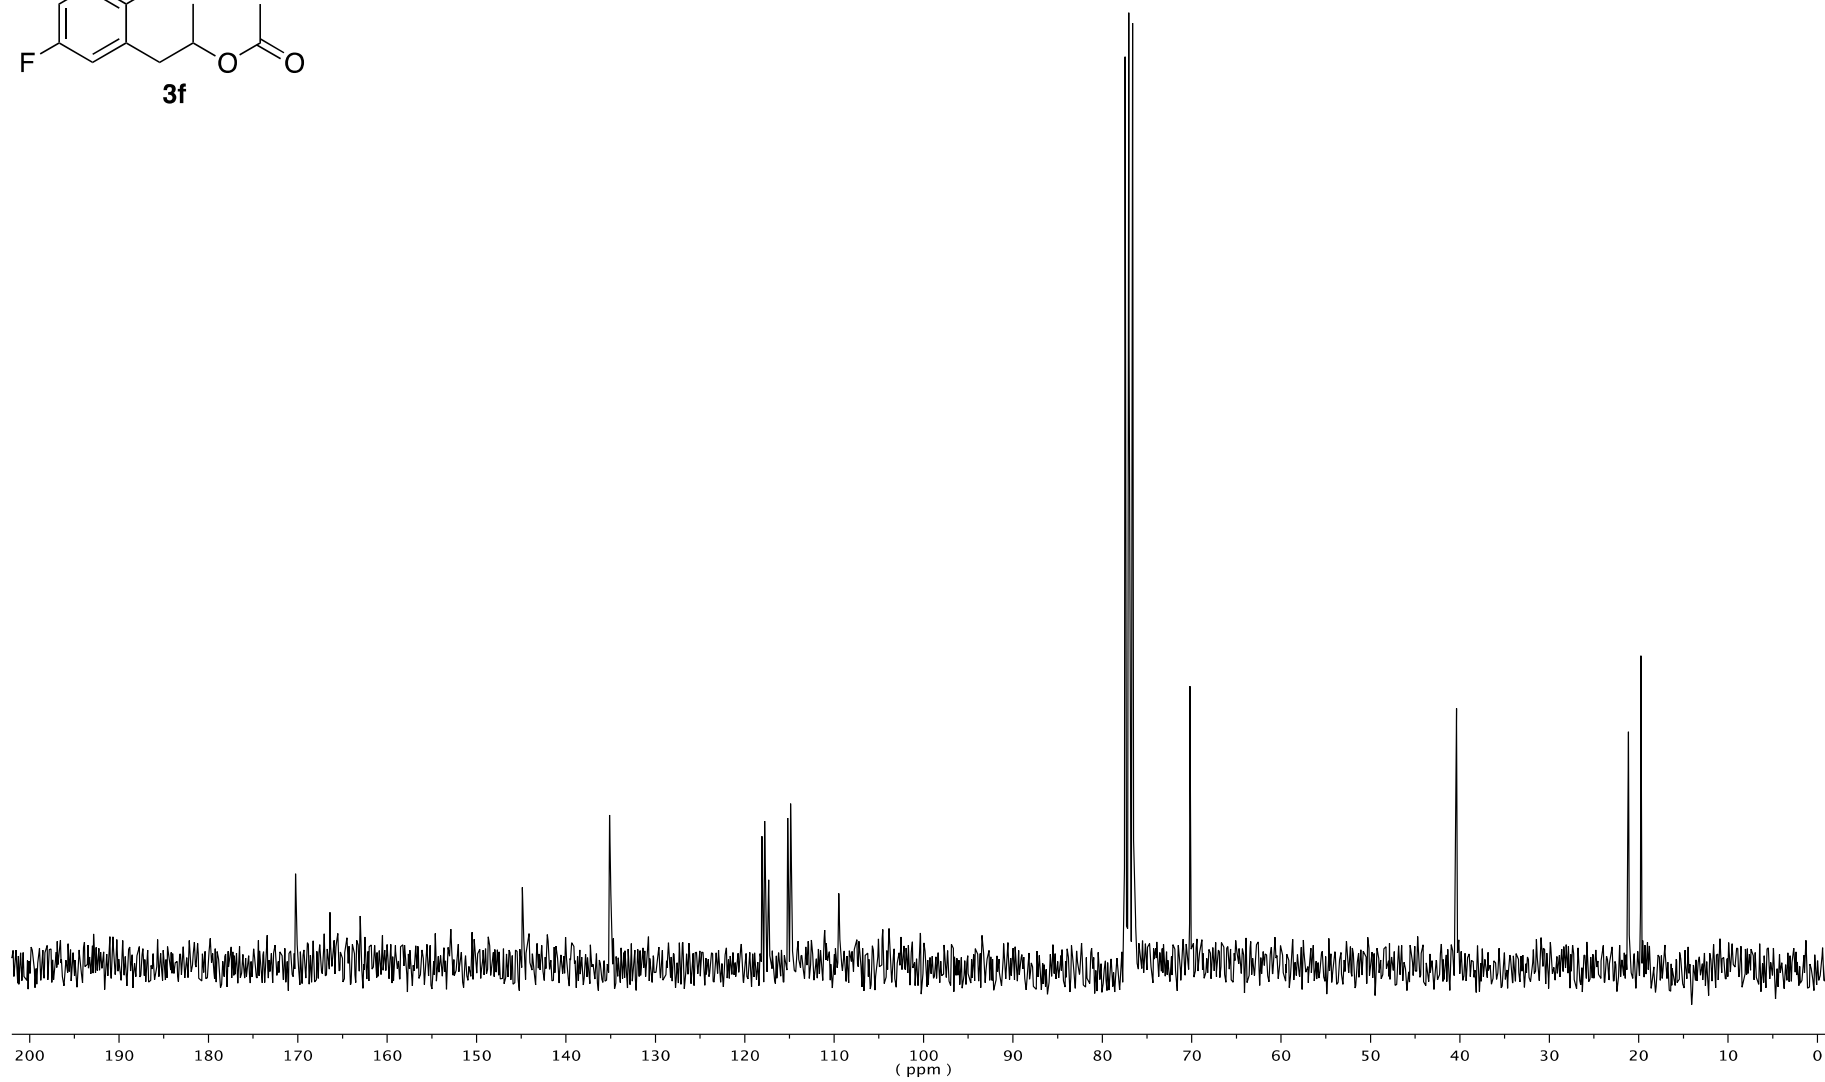

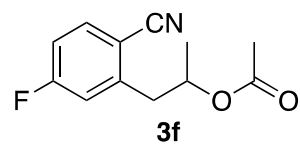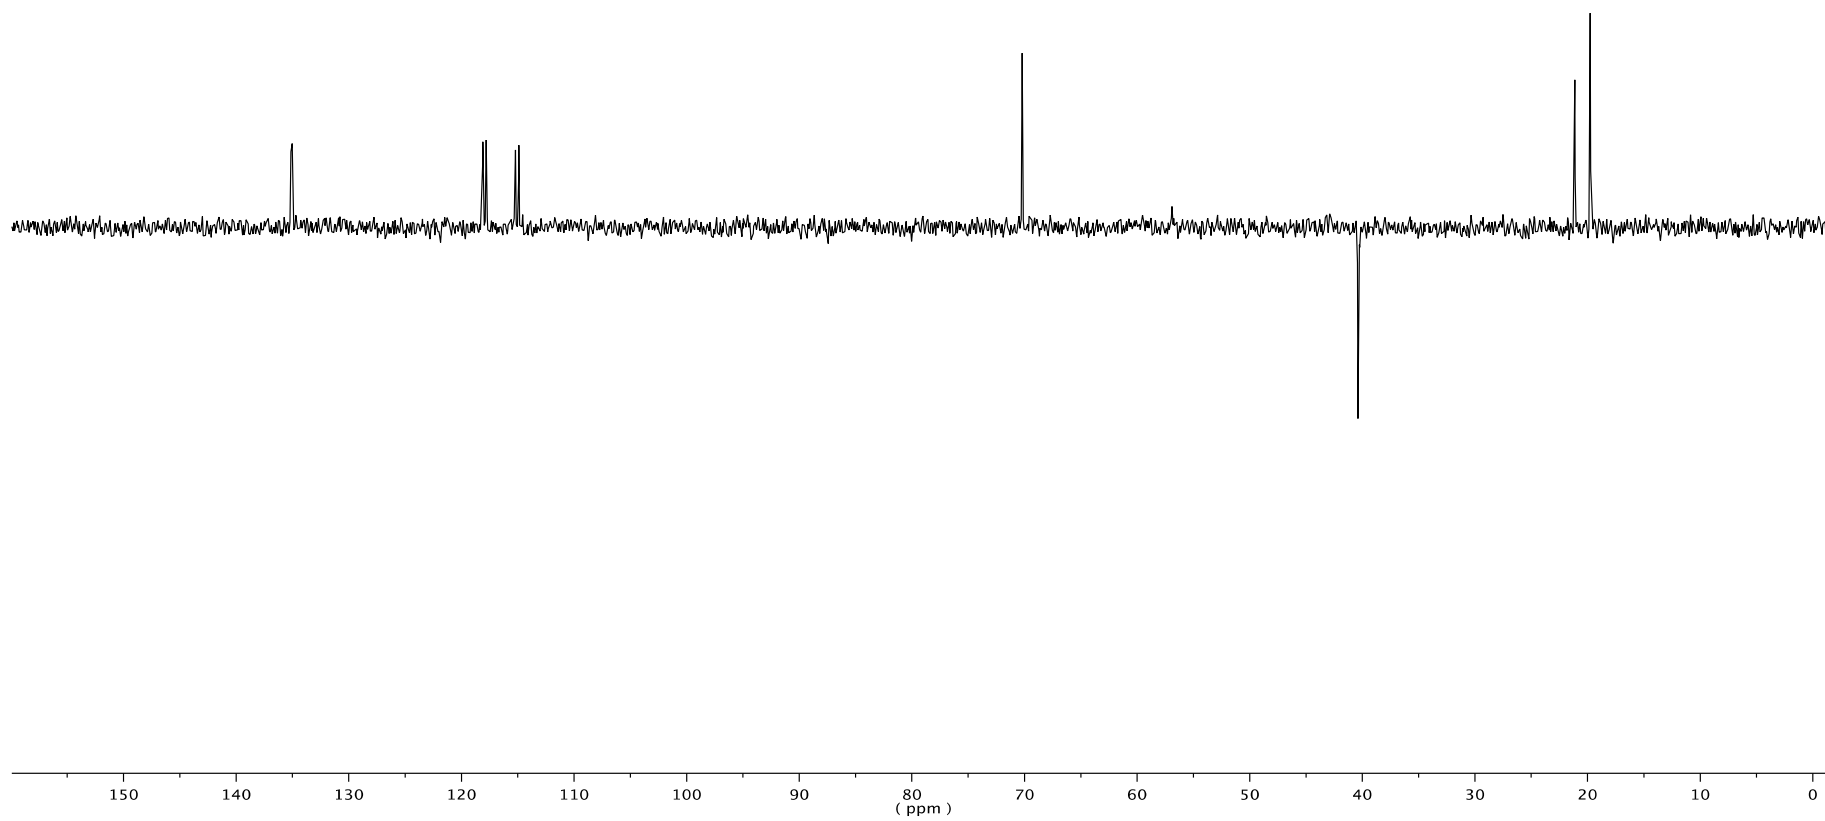

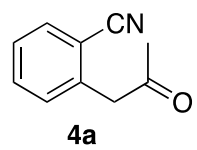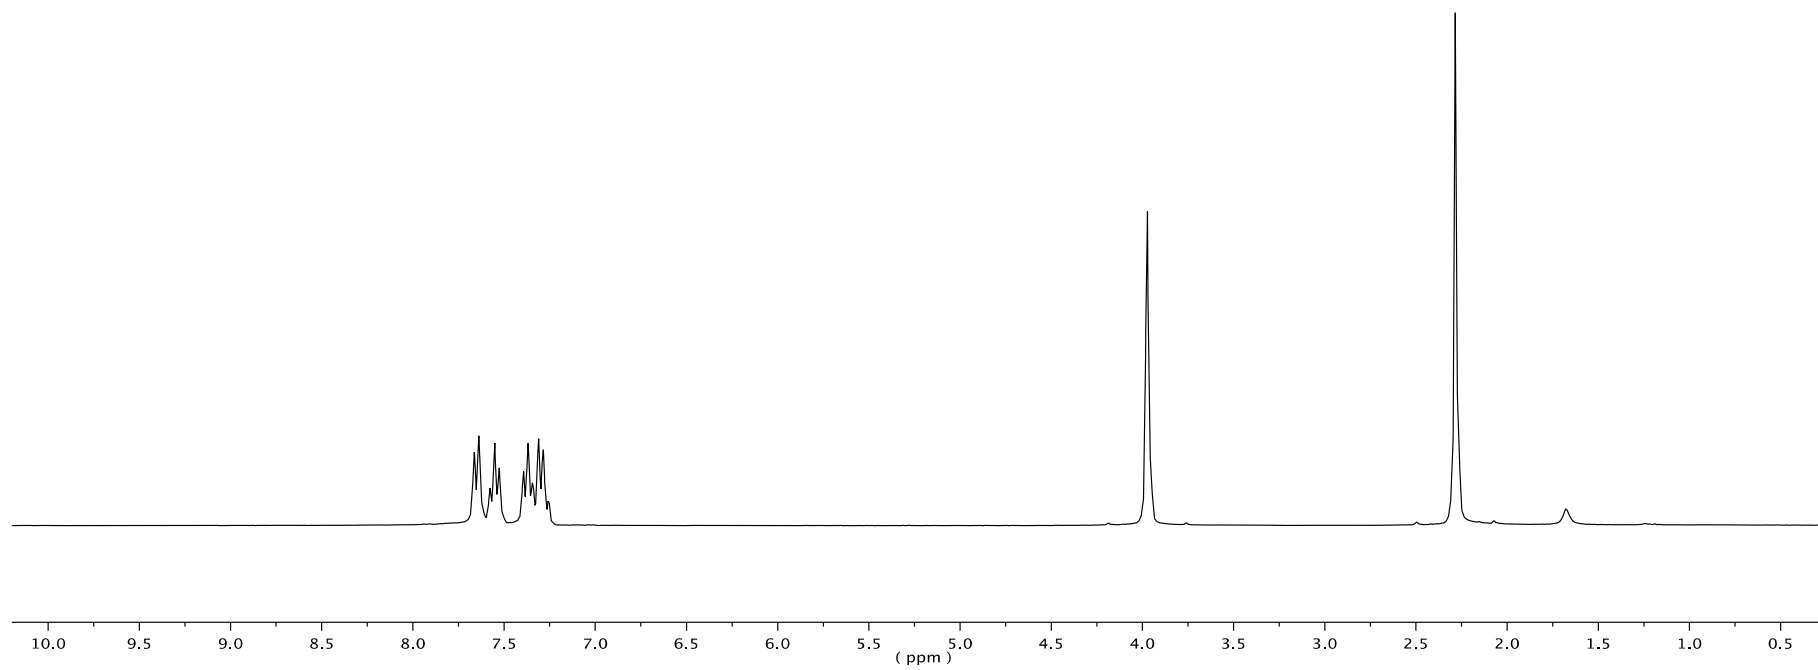

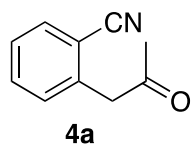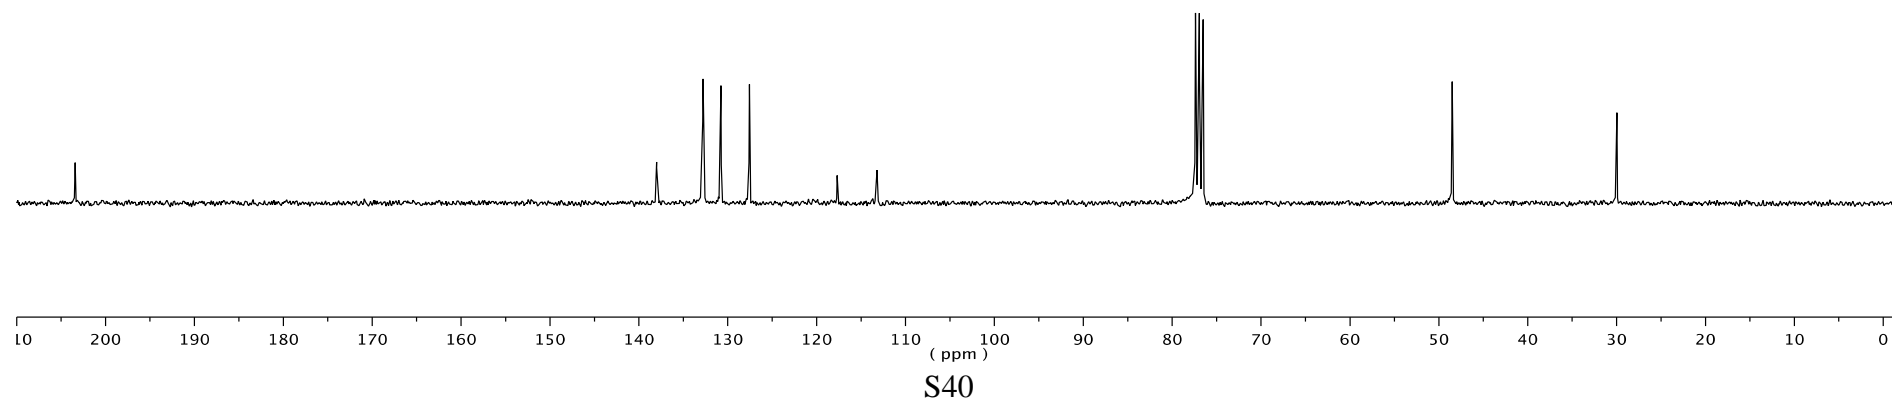



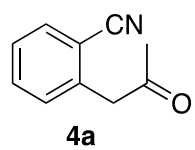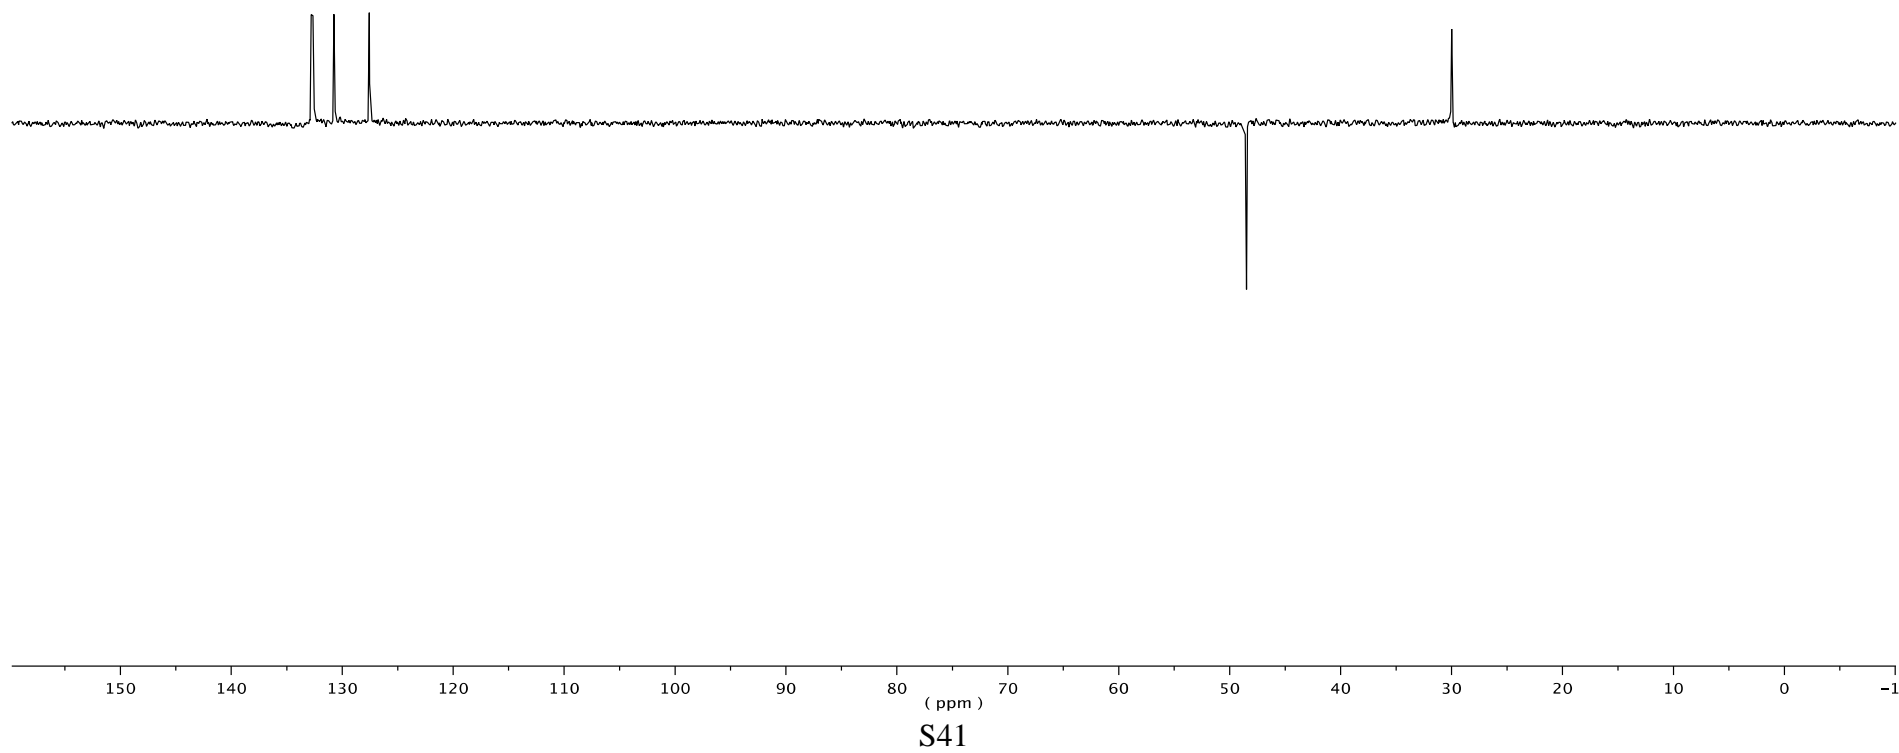

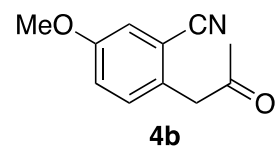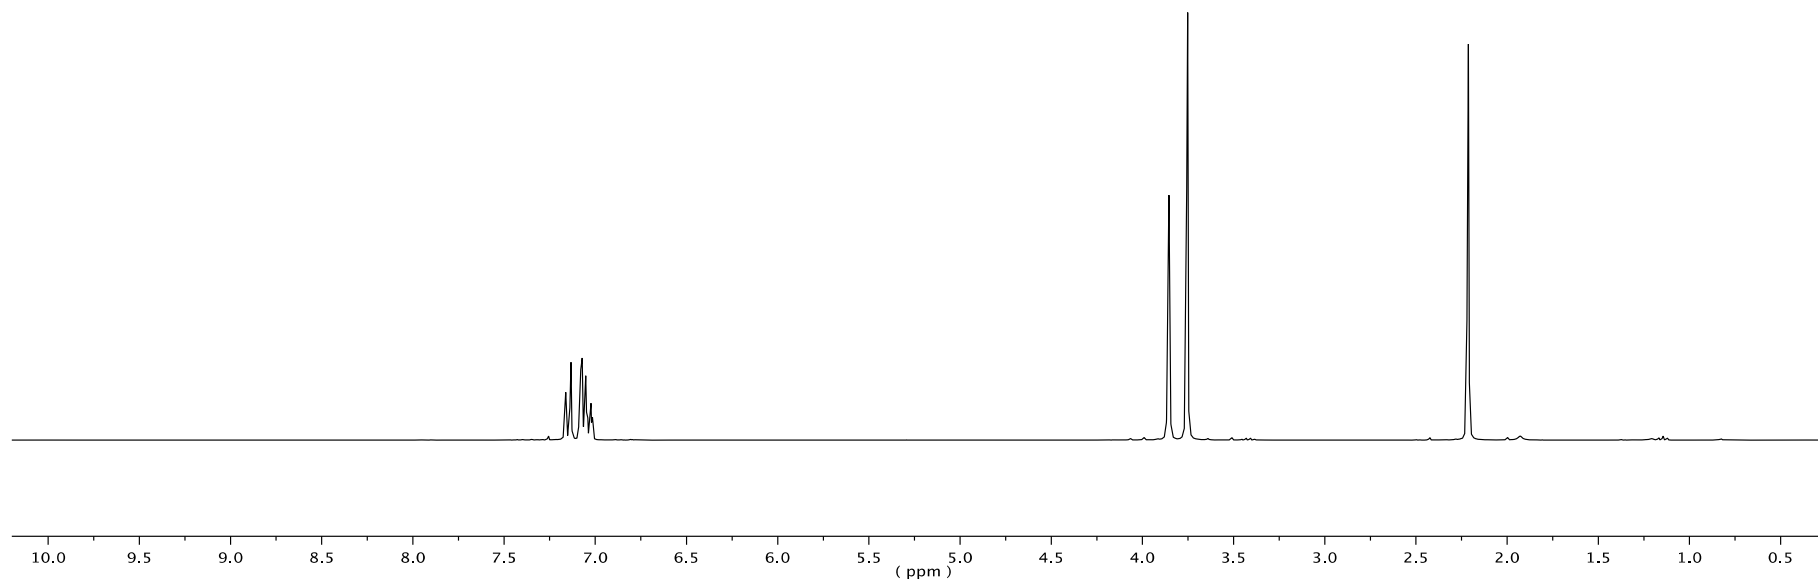

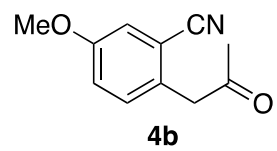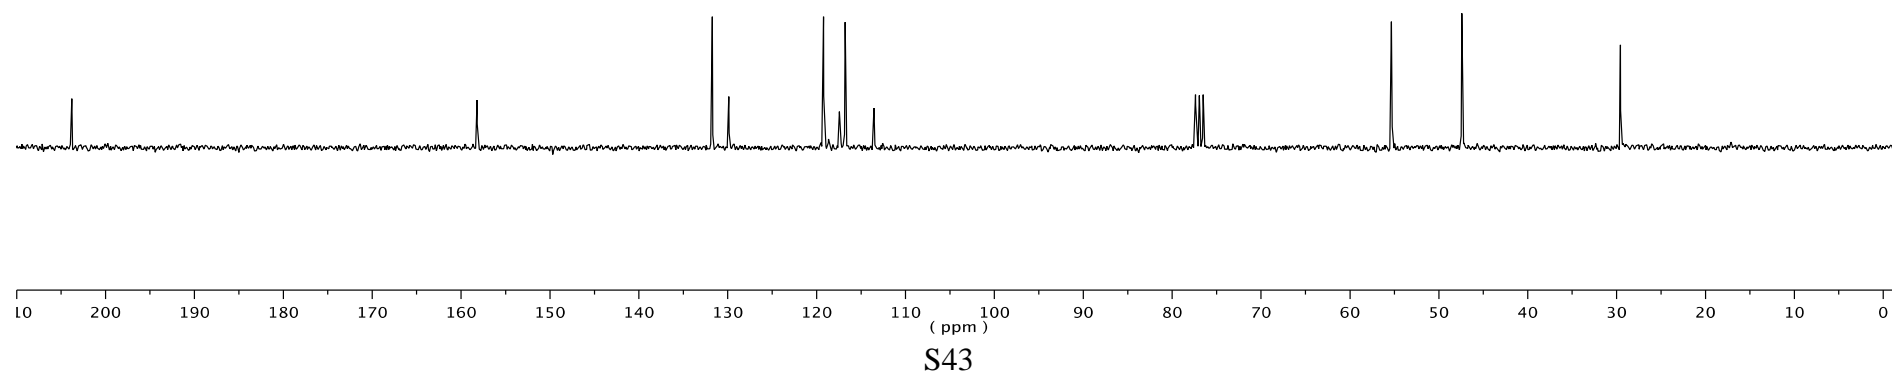

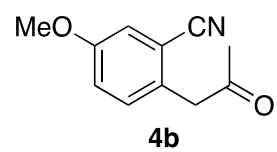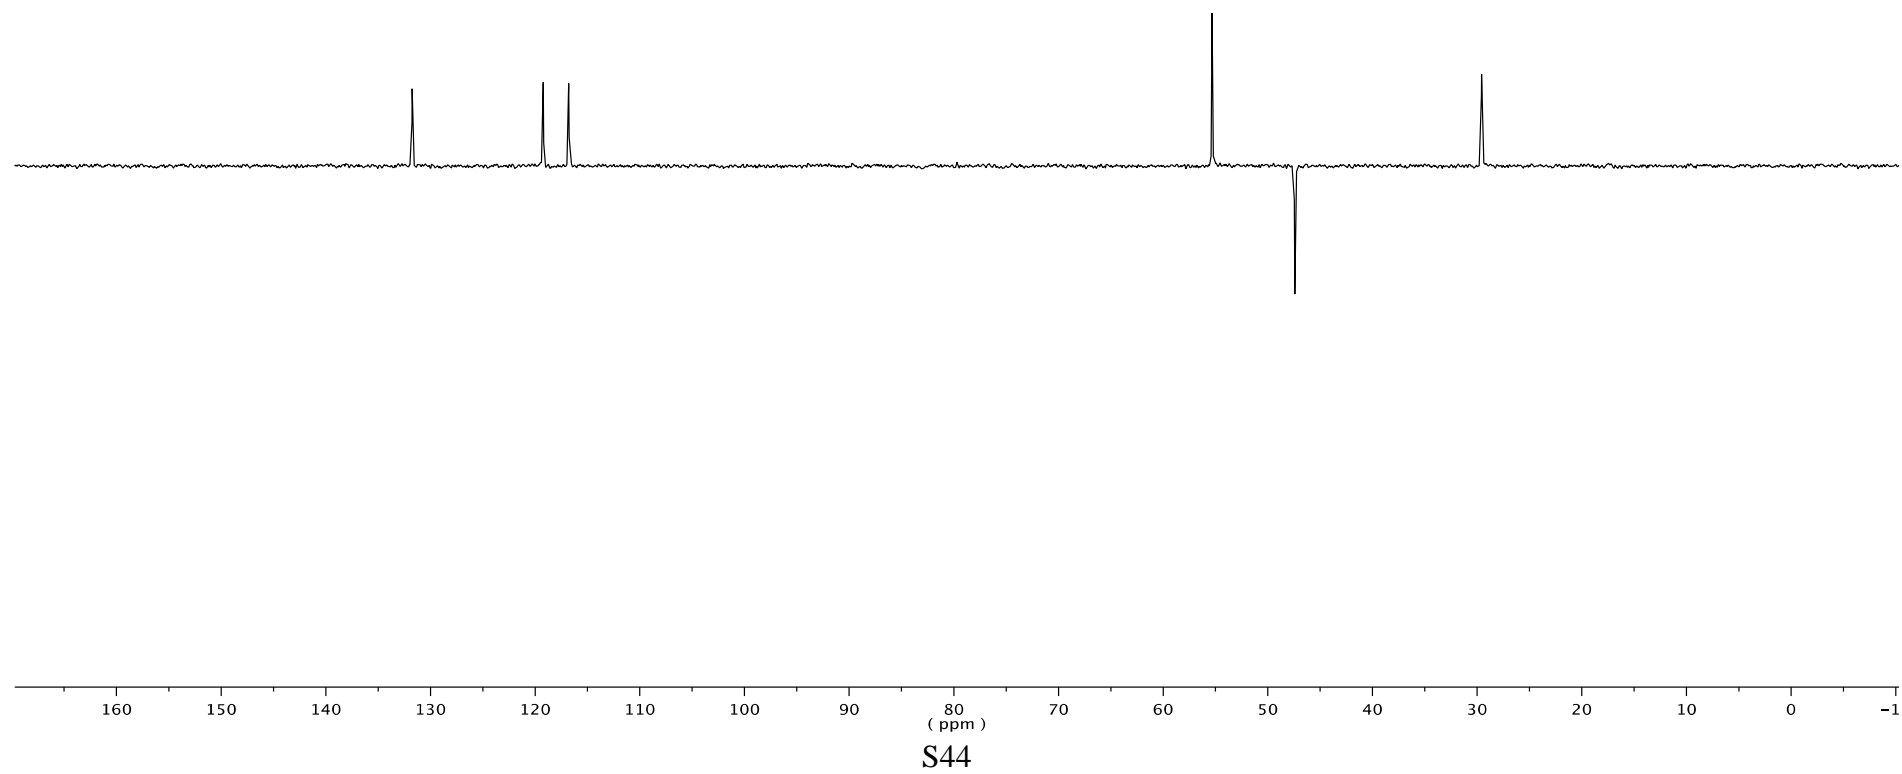

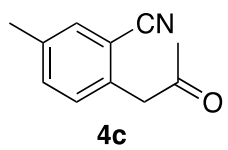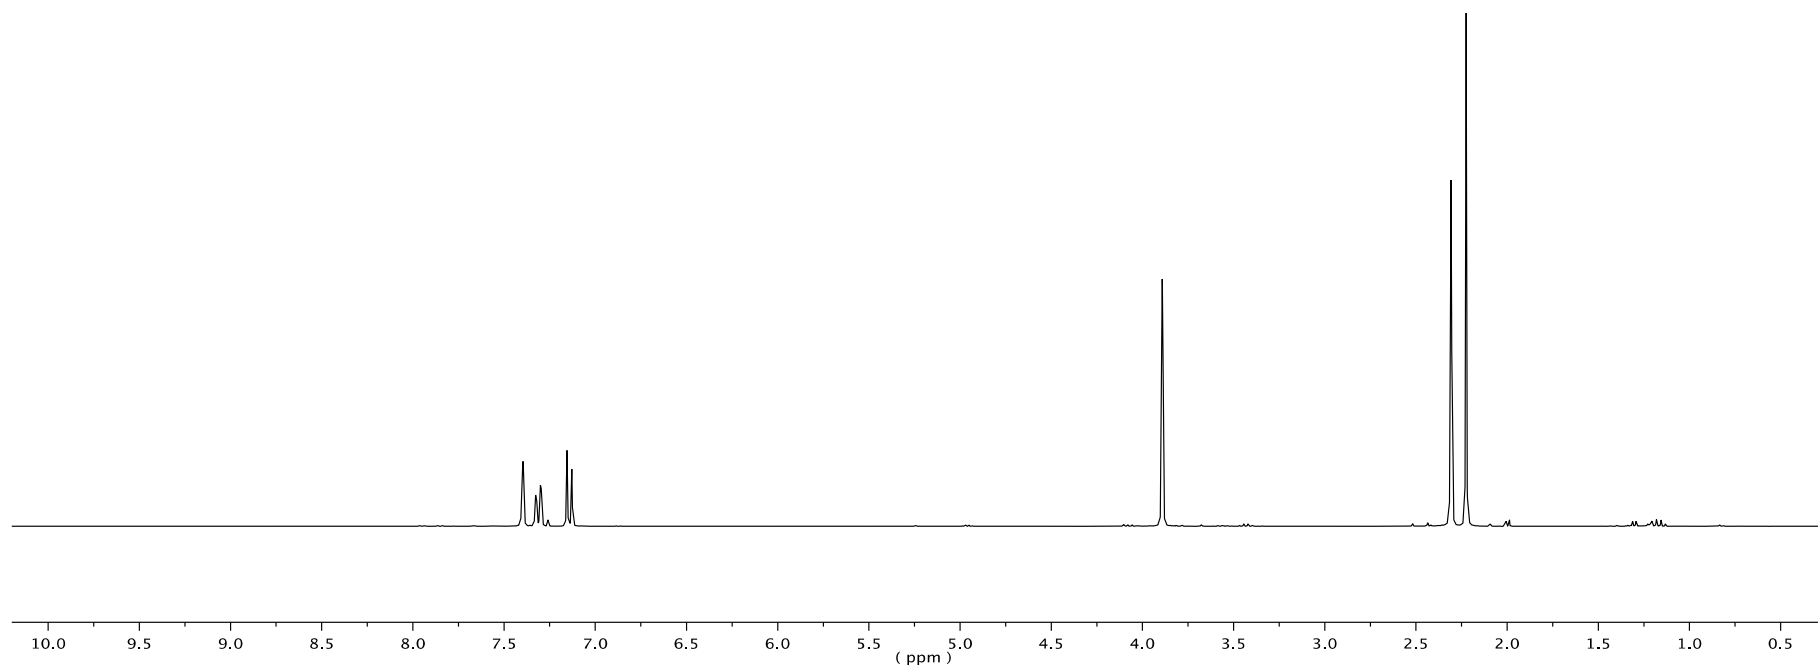

S45

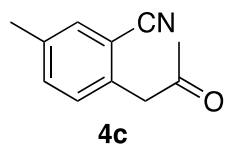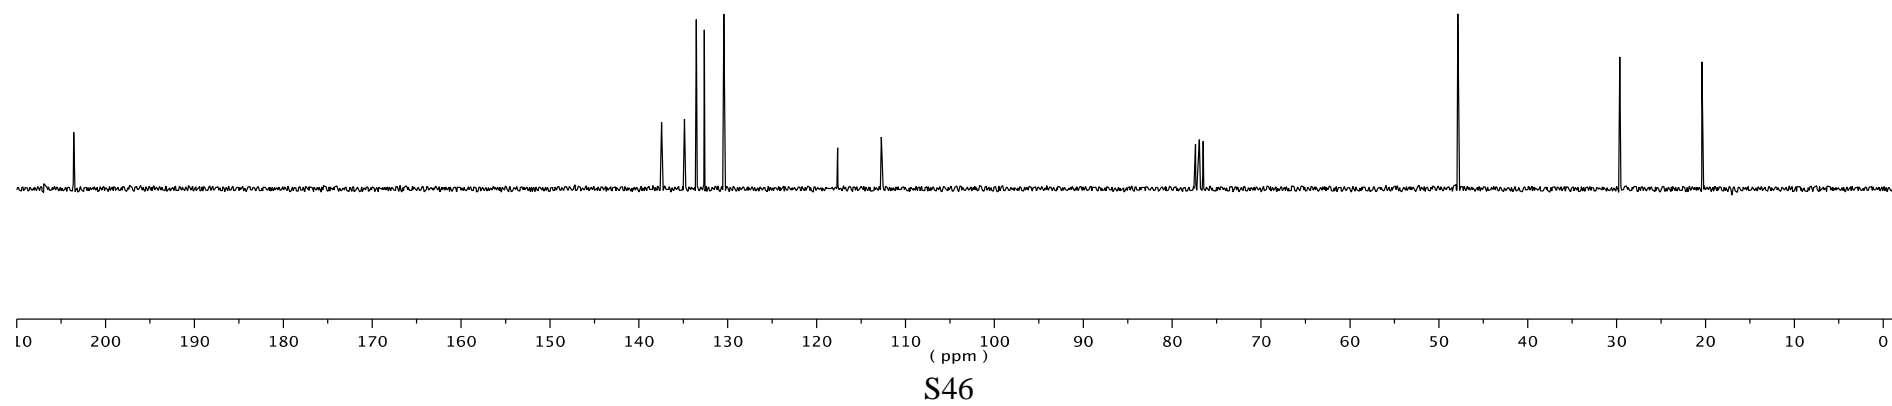

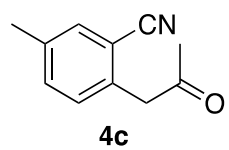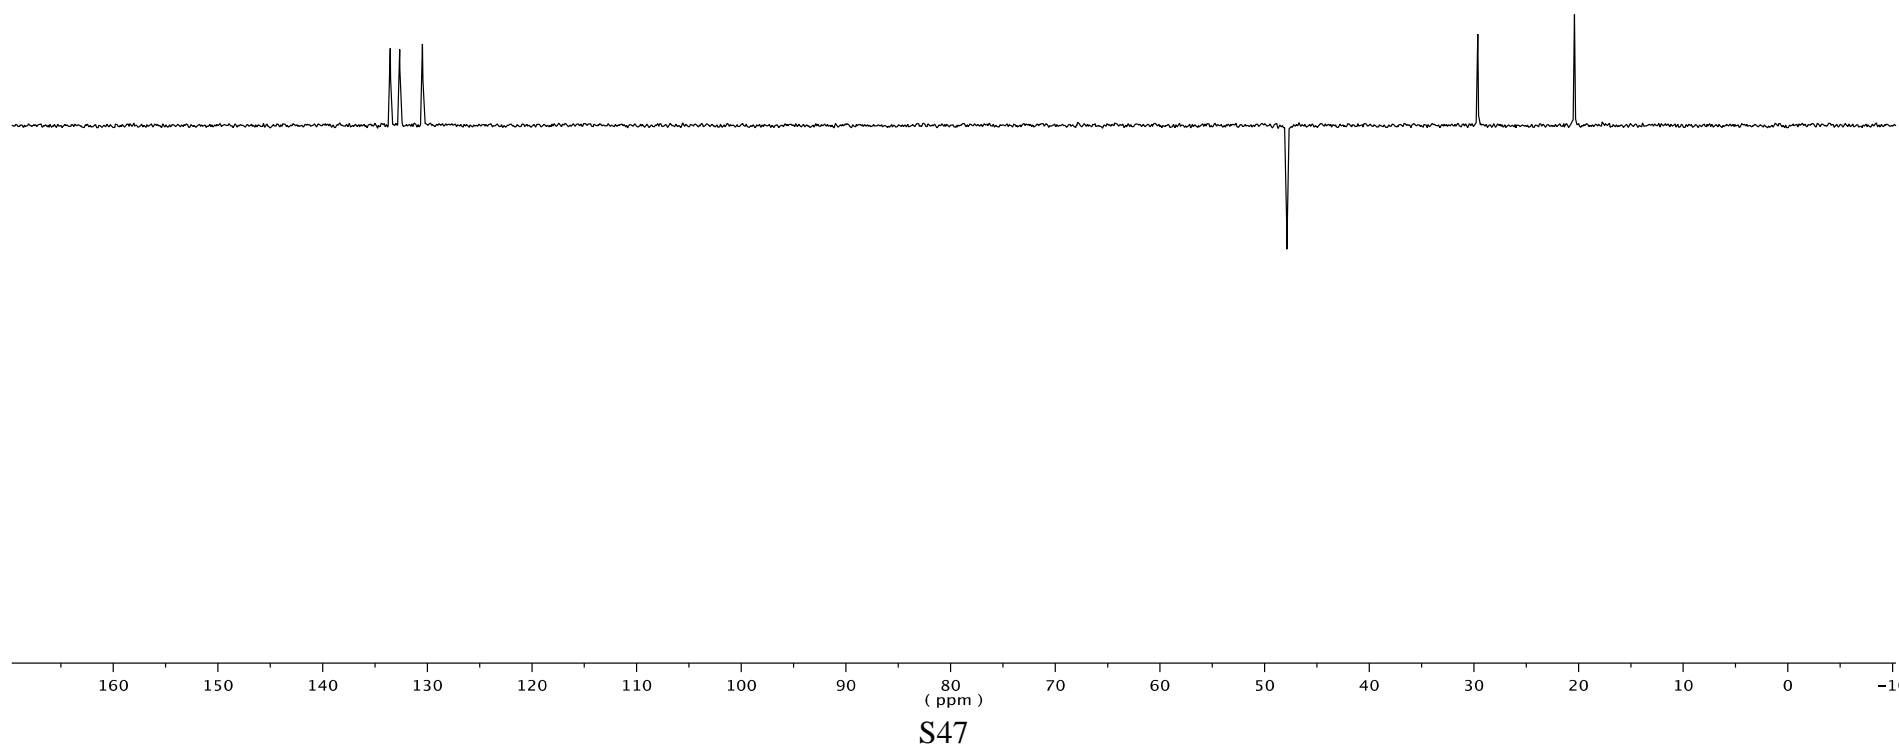

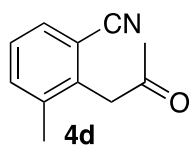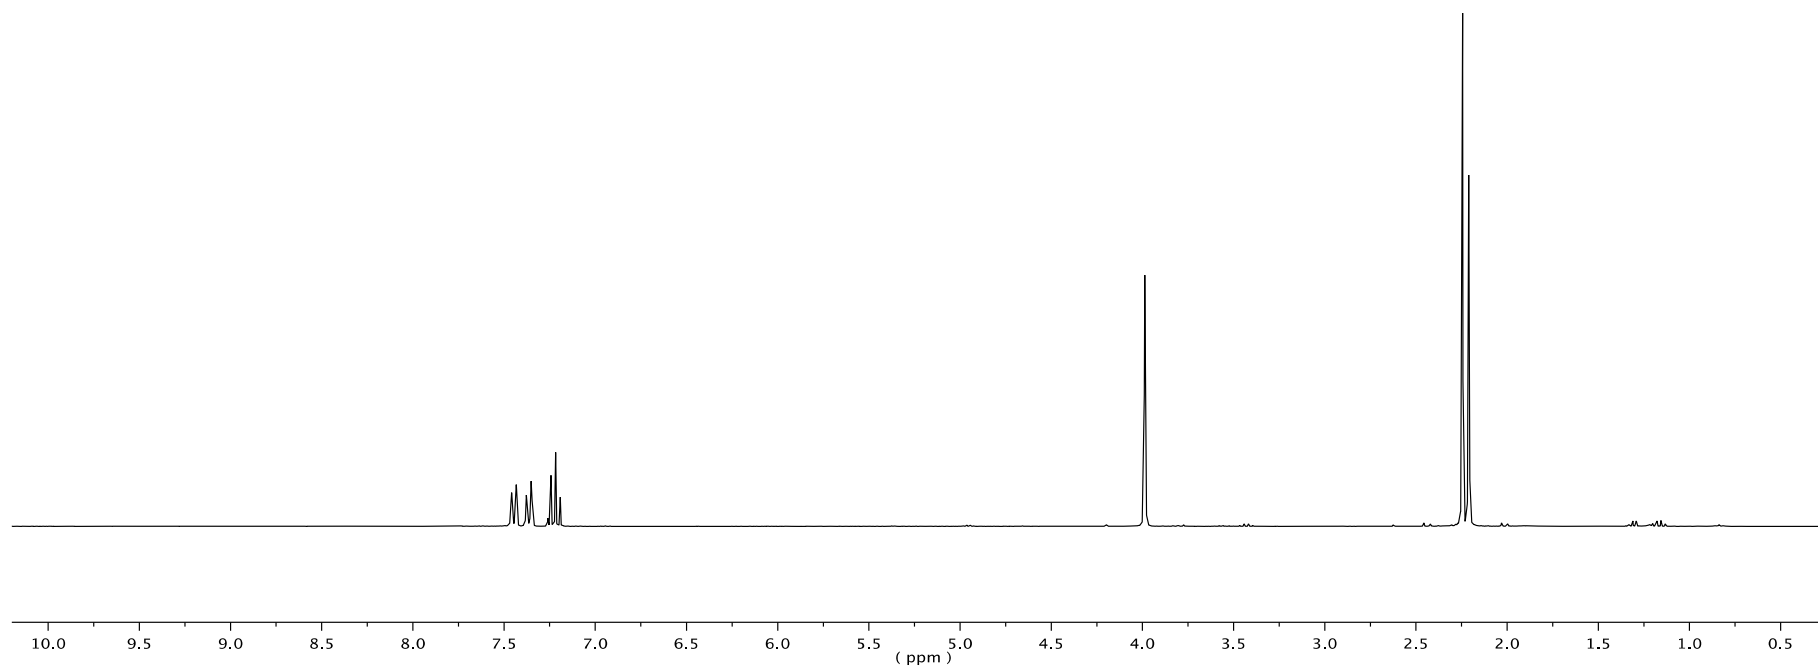

S48



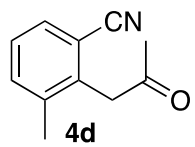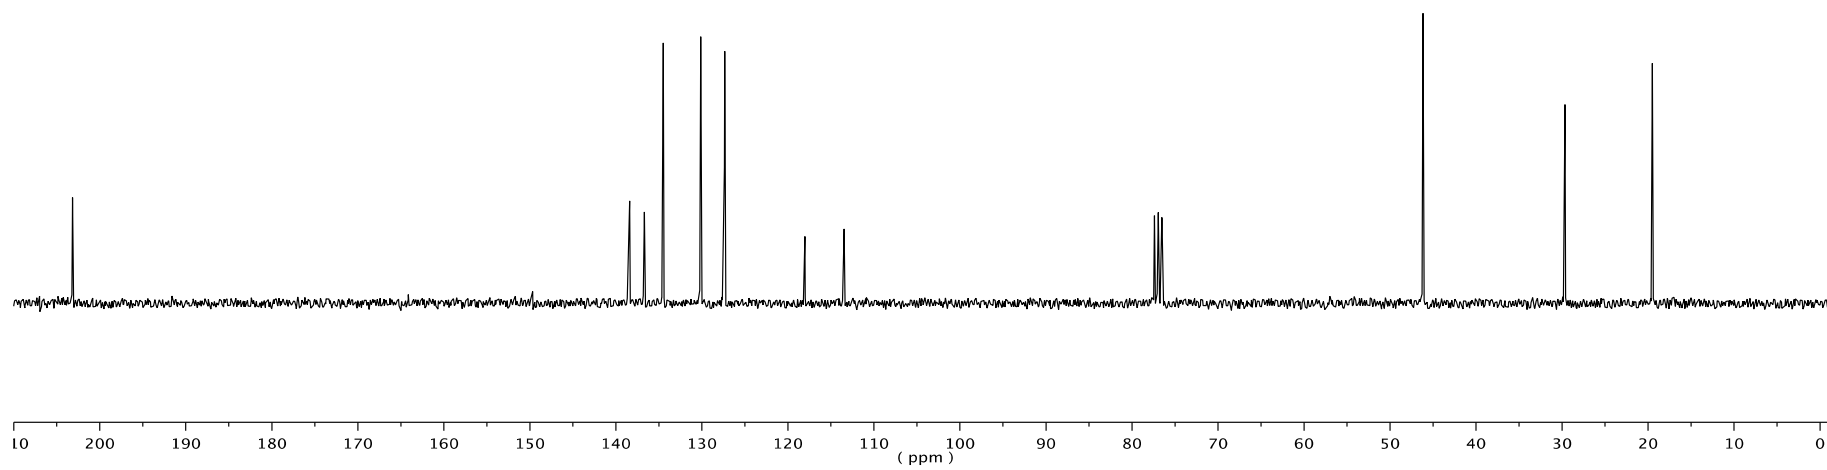

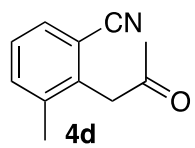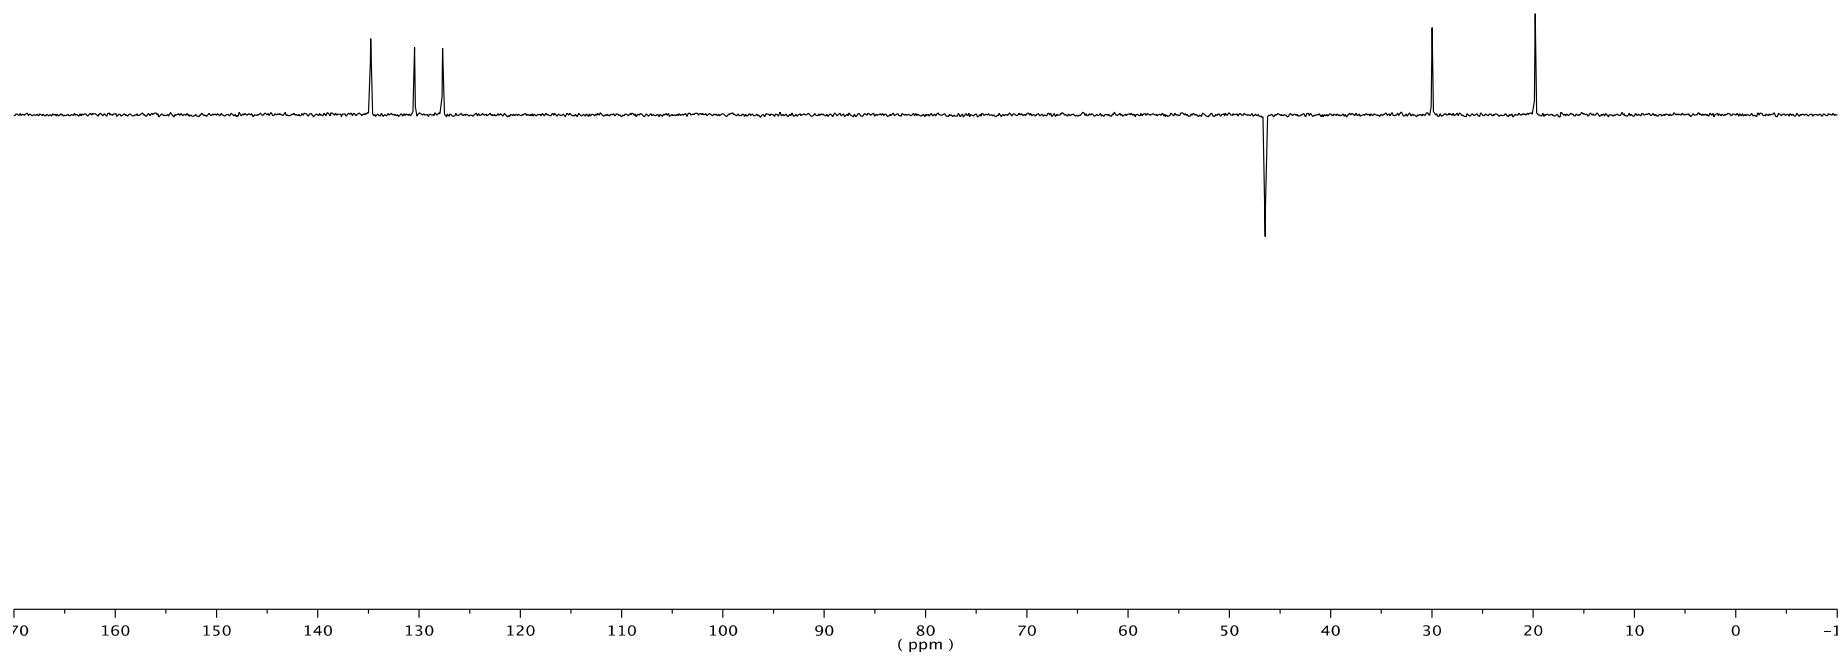

S50

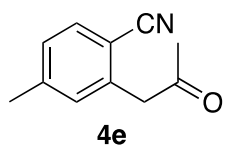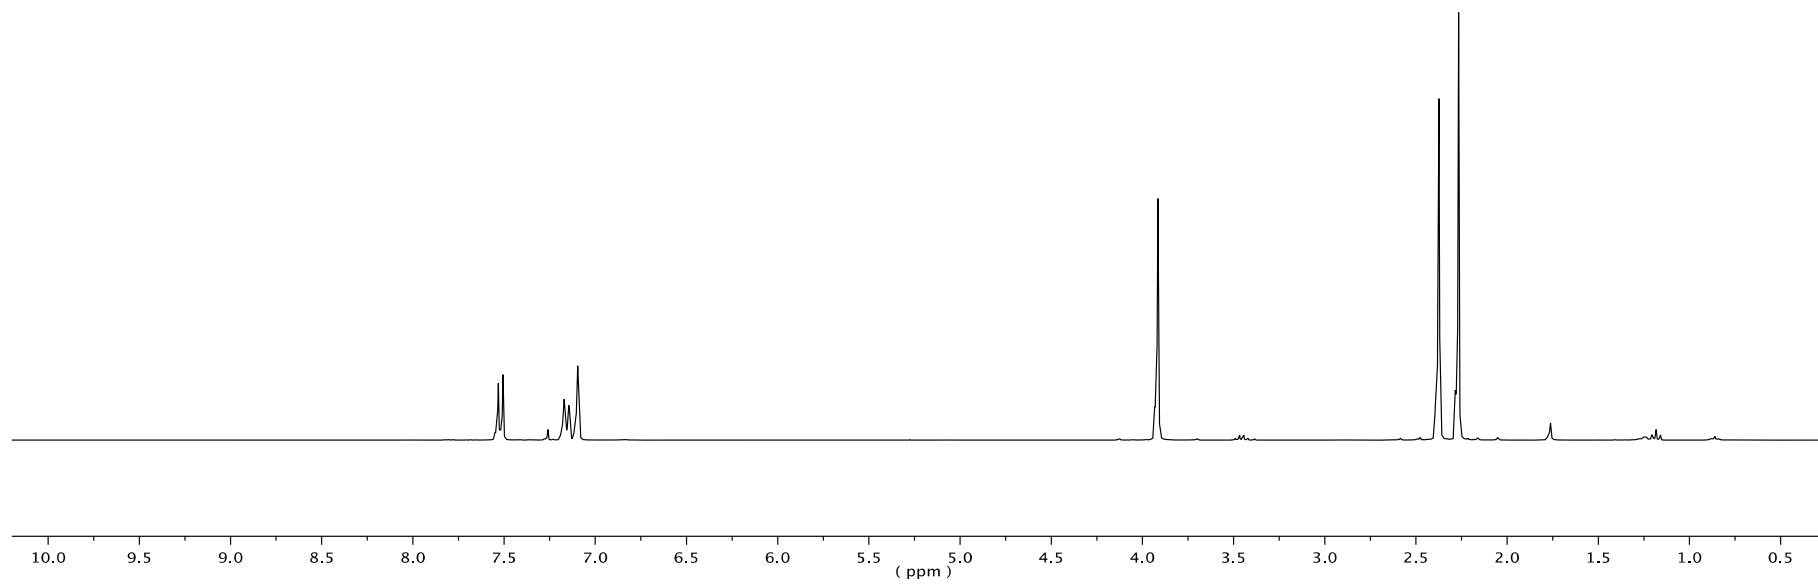

S51

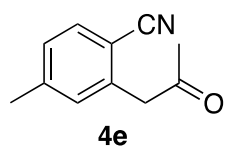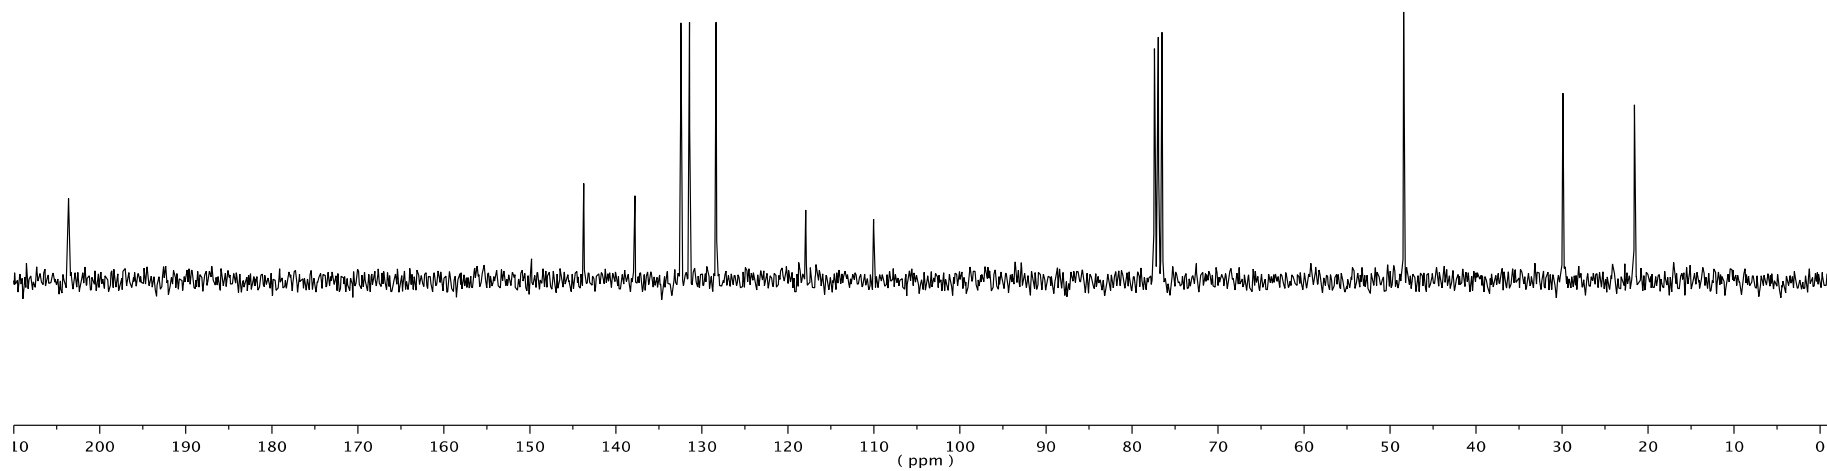

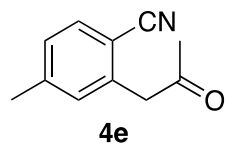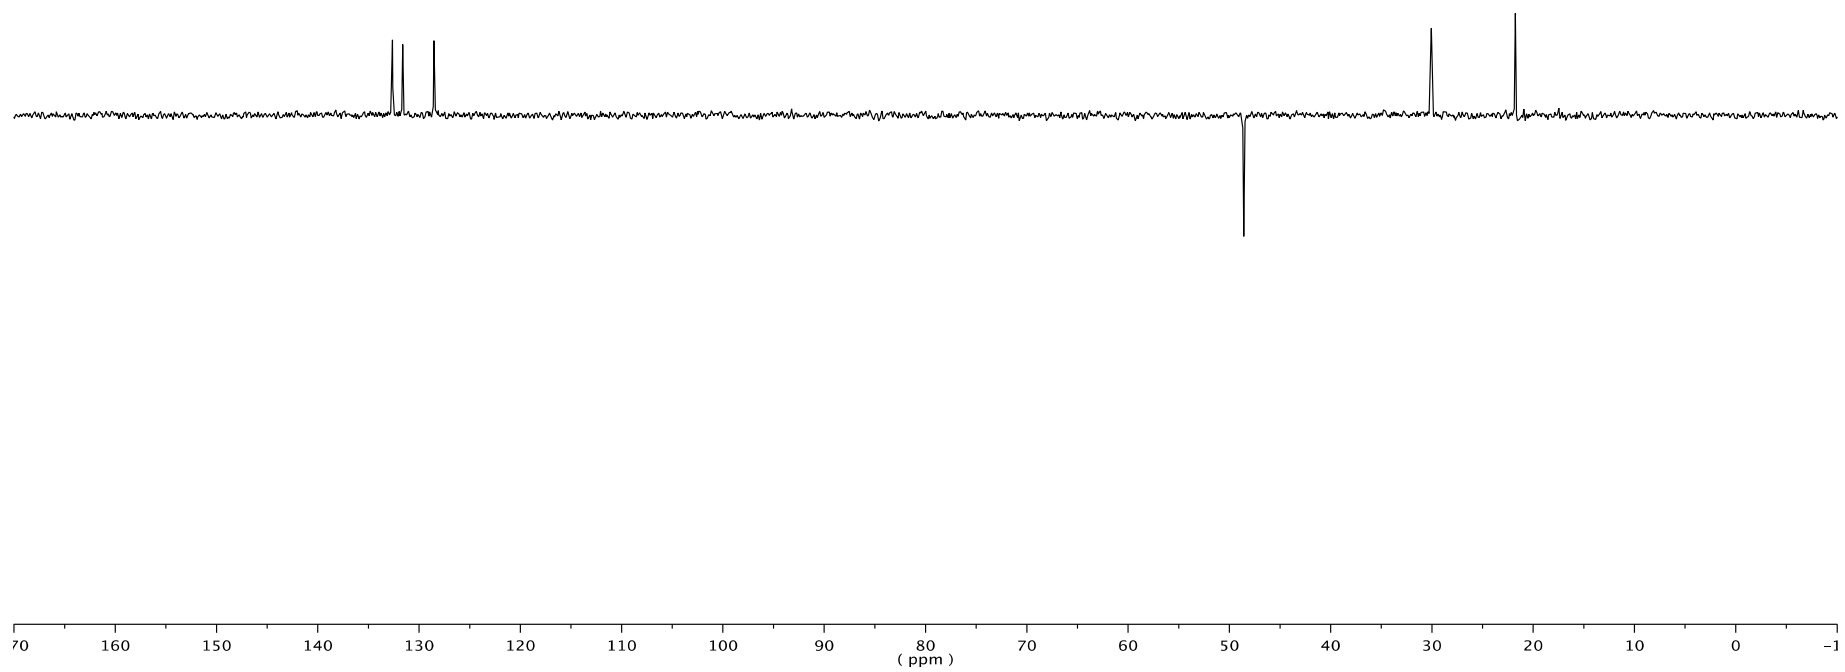

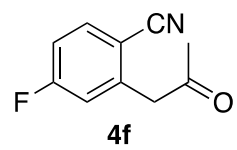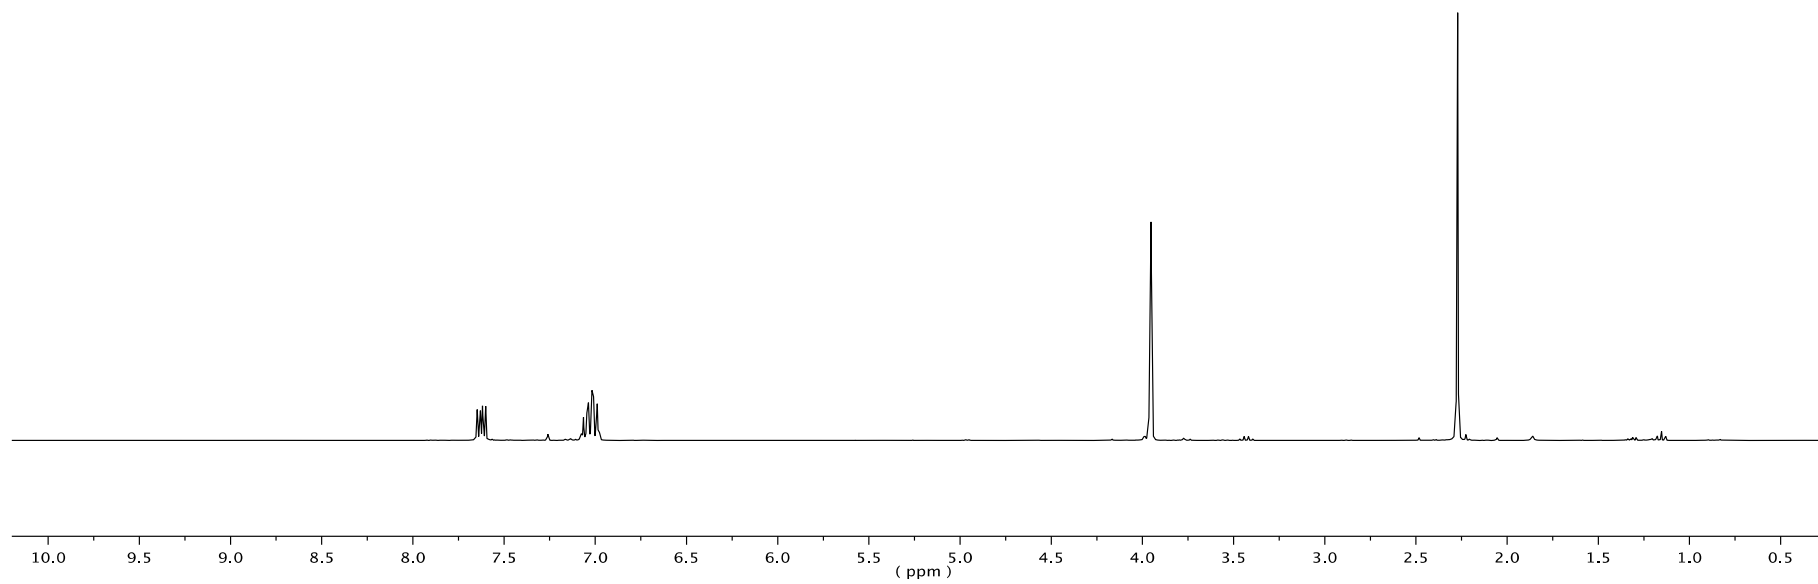

S54

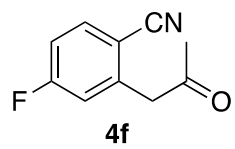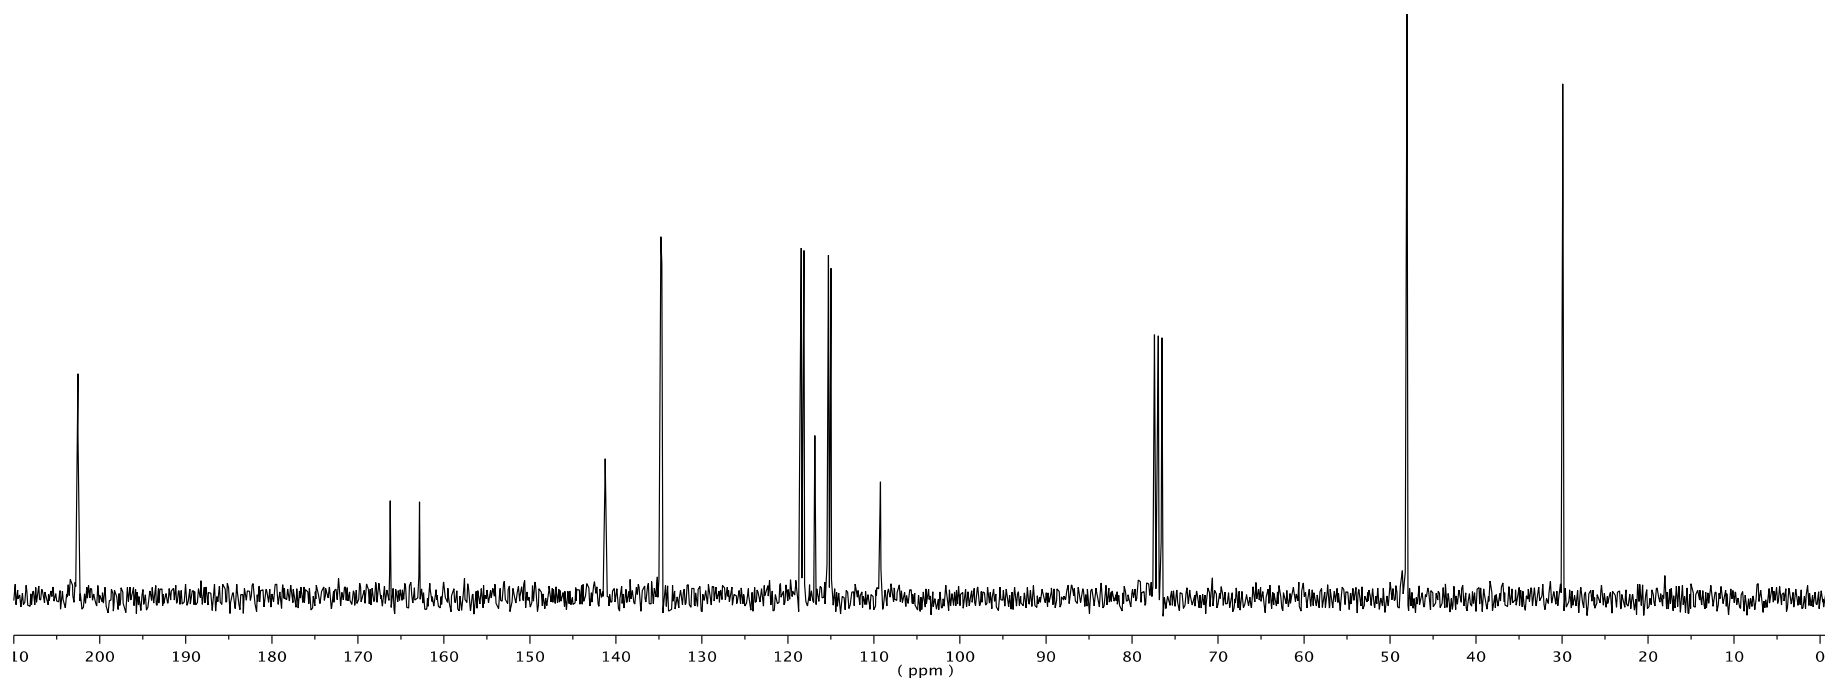

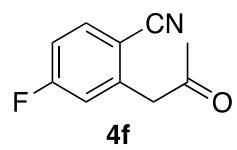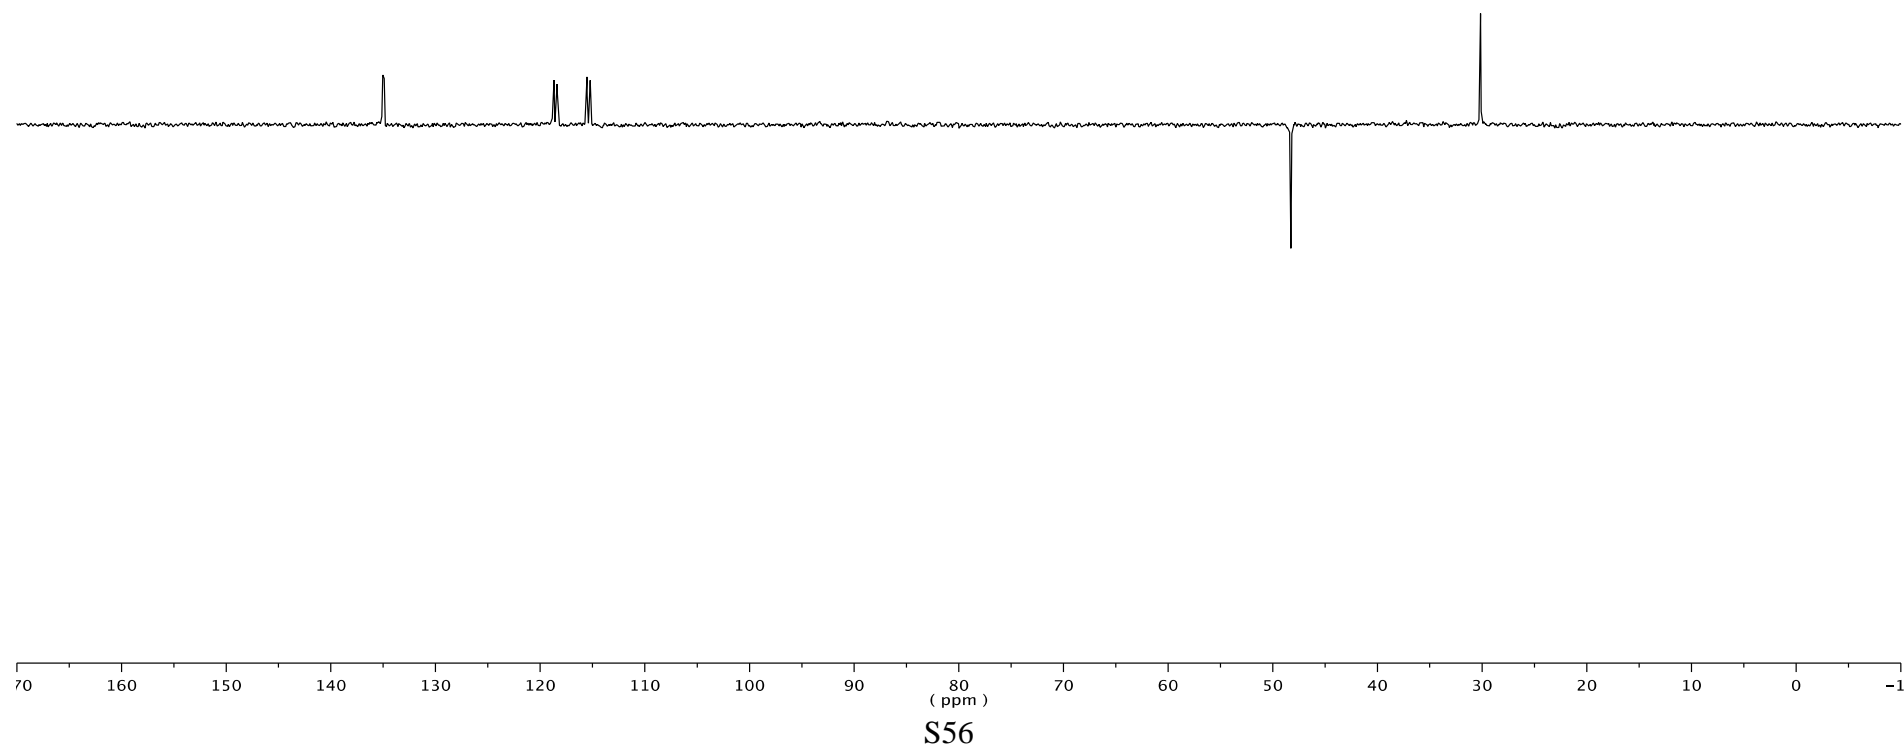



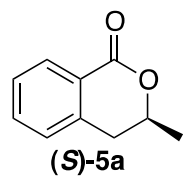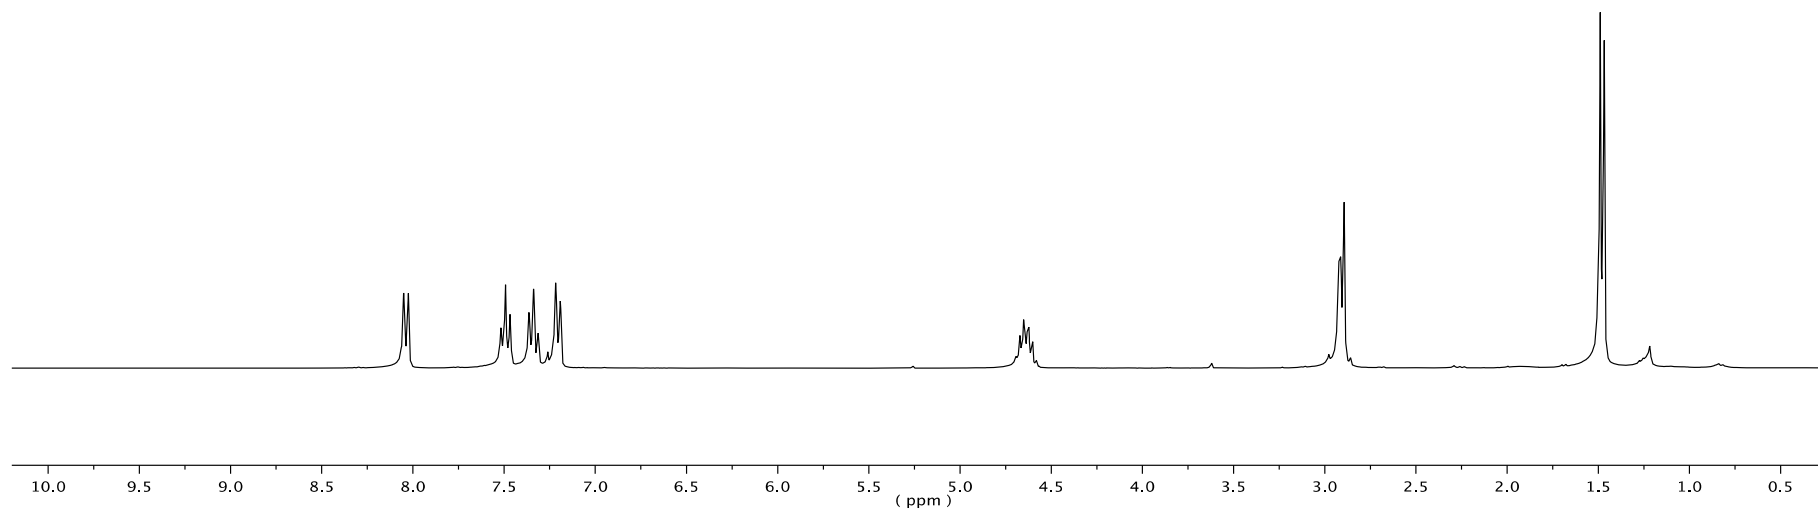

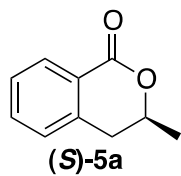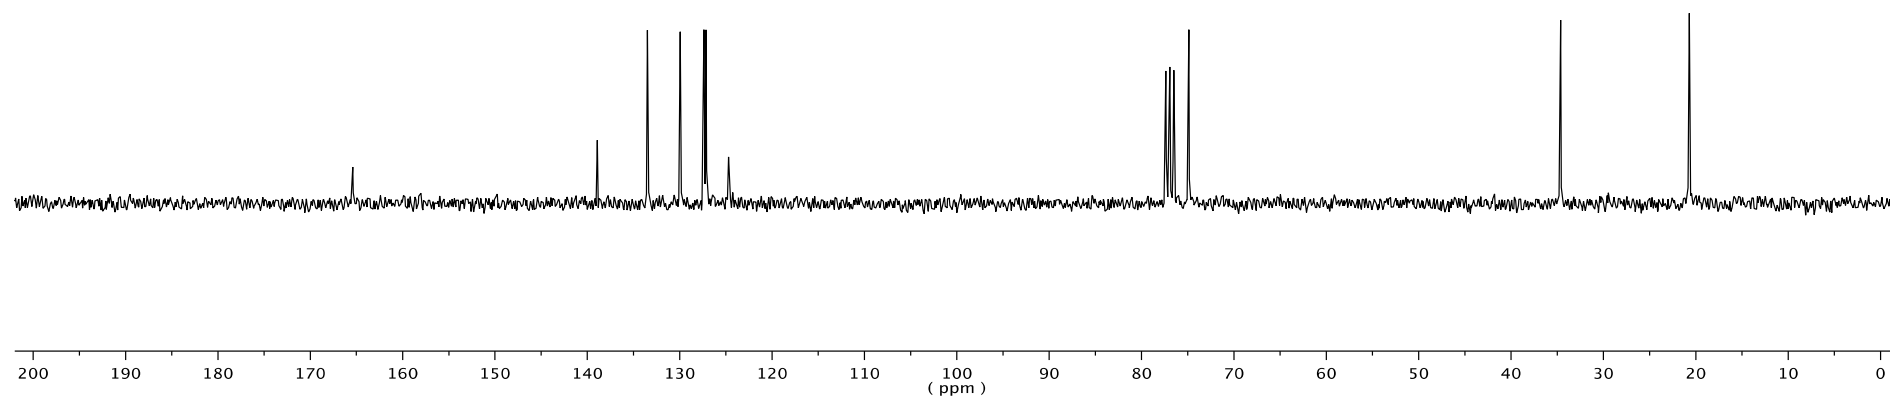

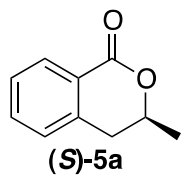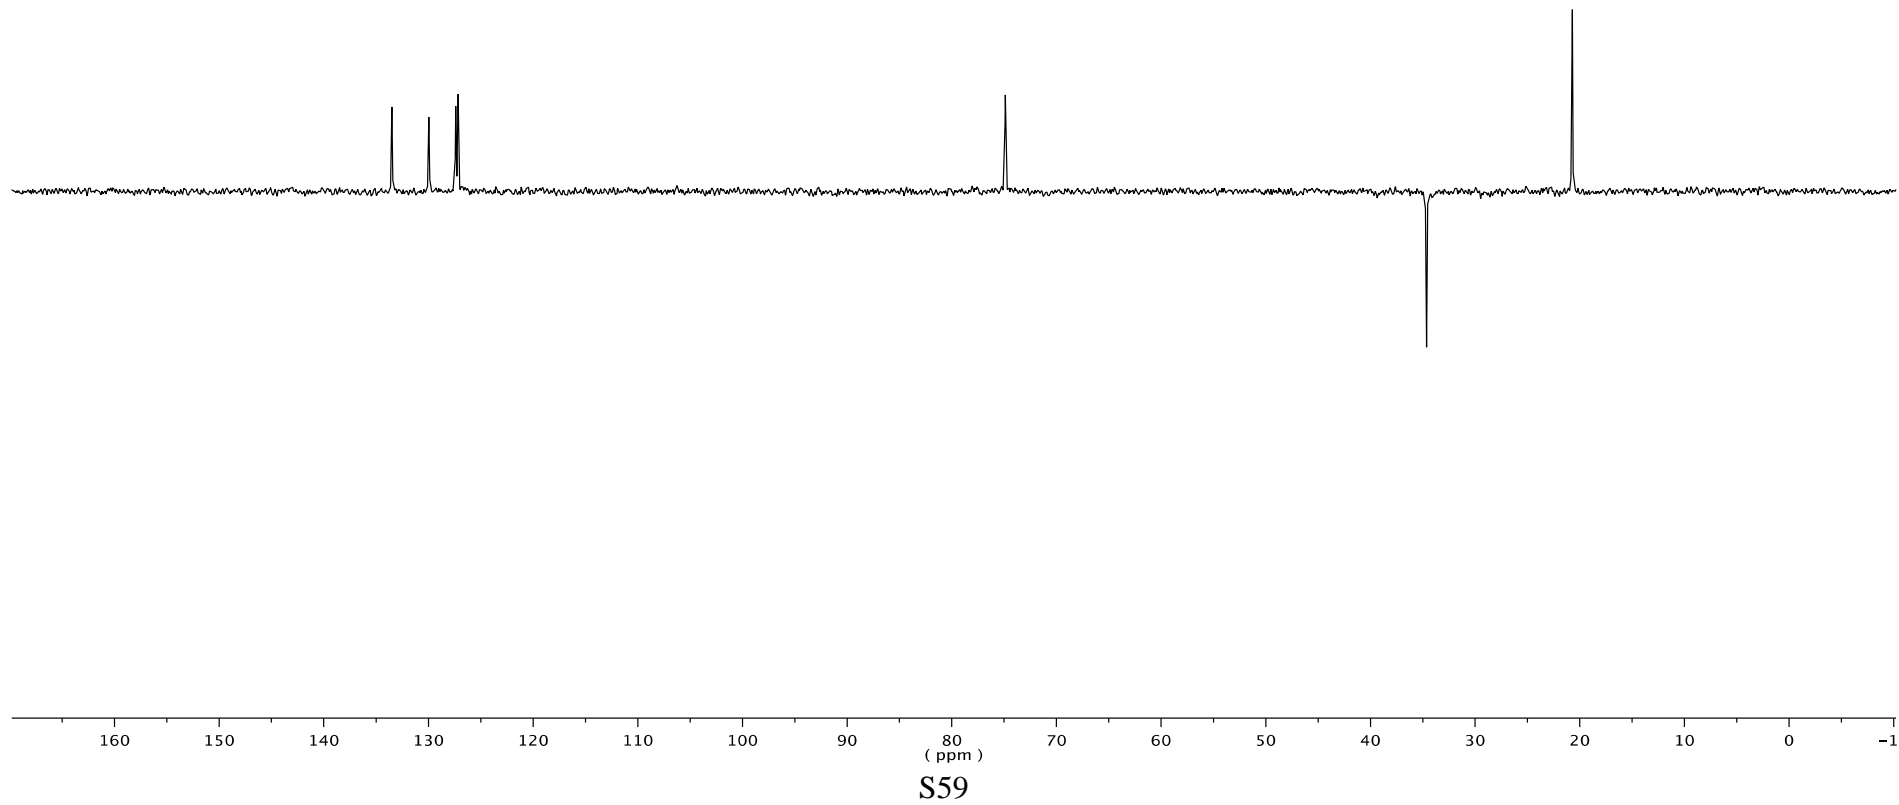

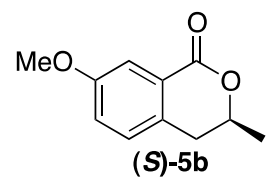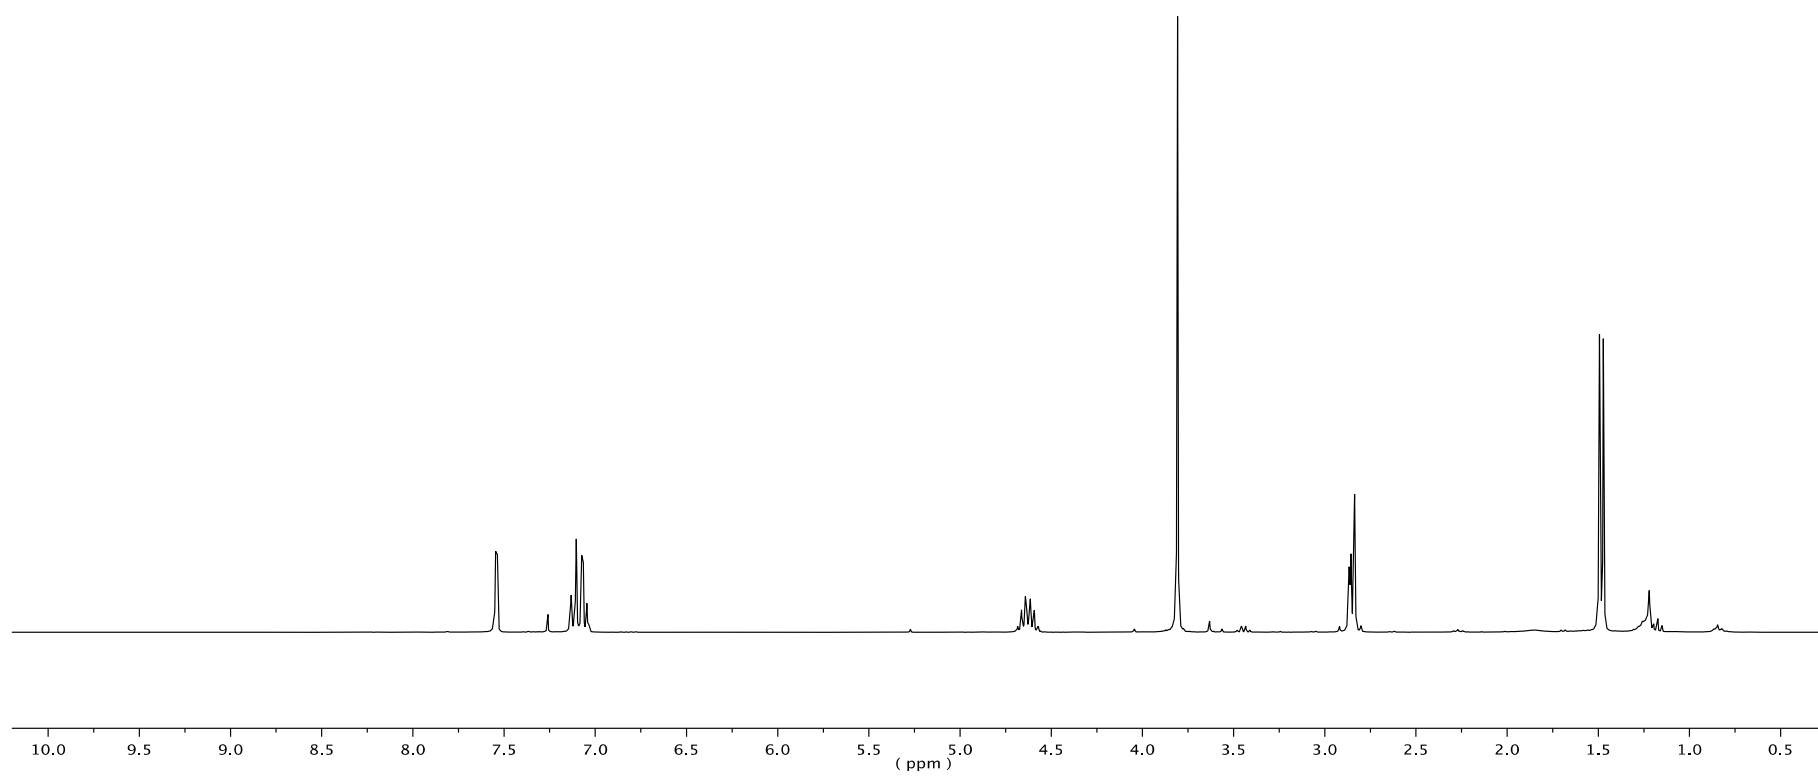

S60

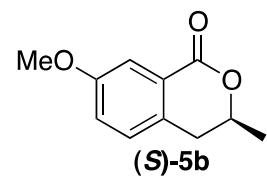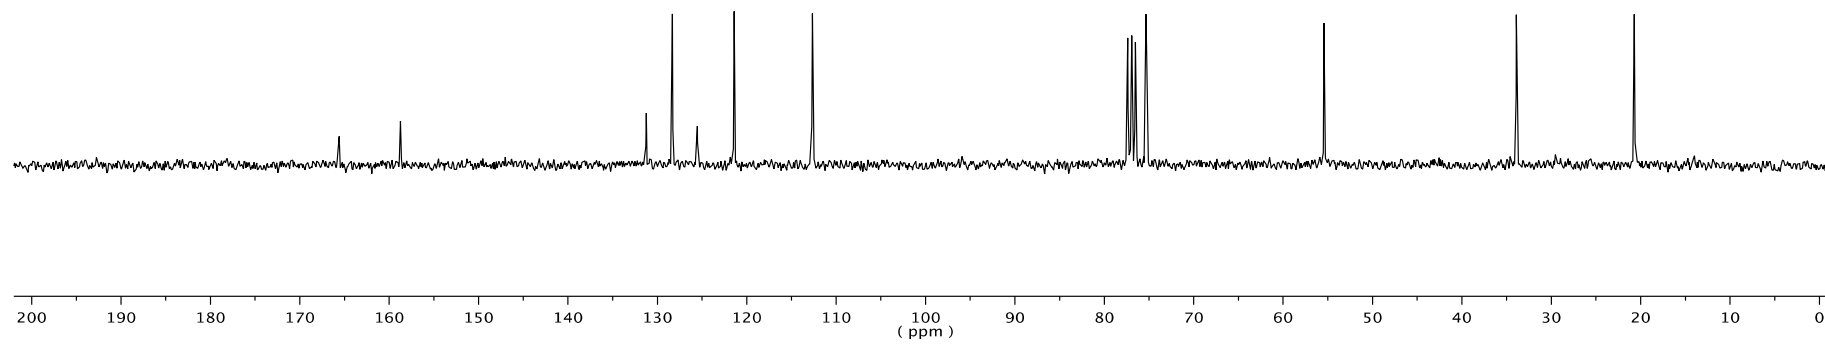

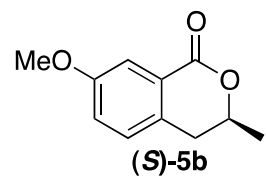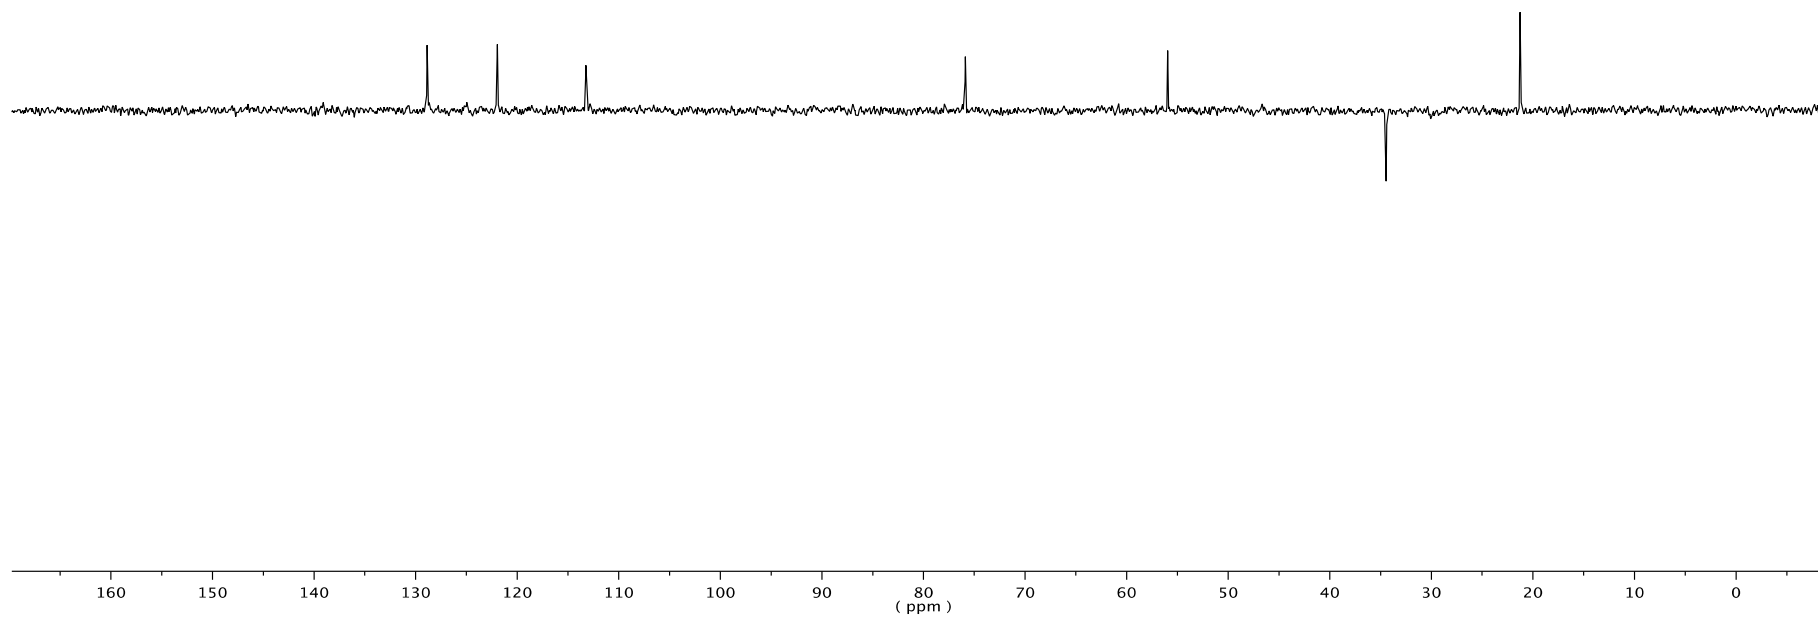

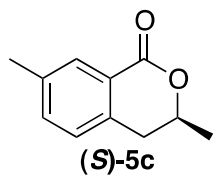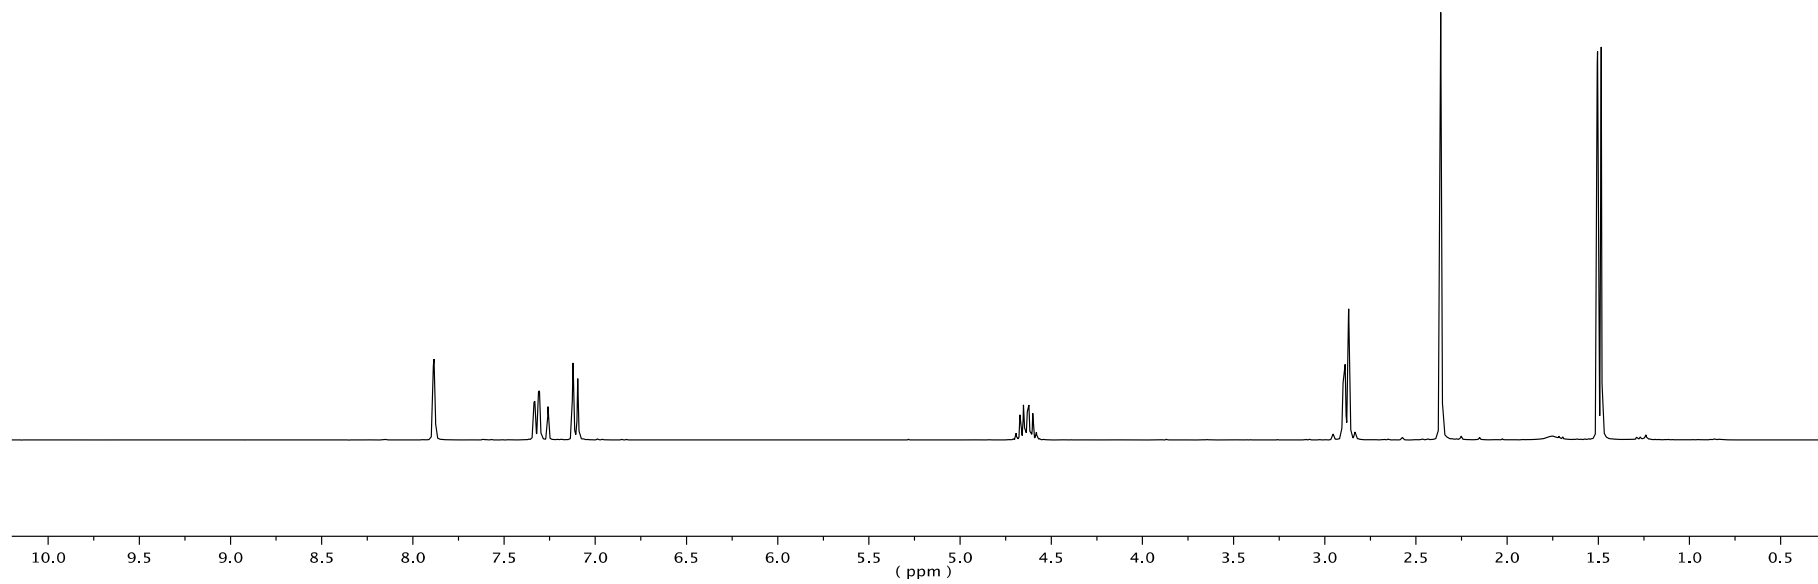

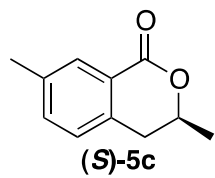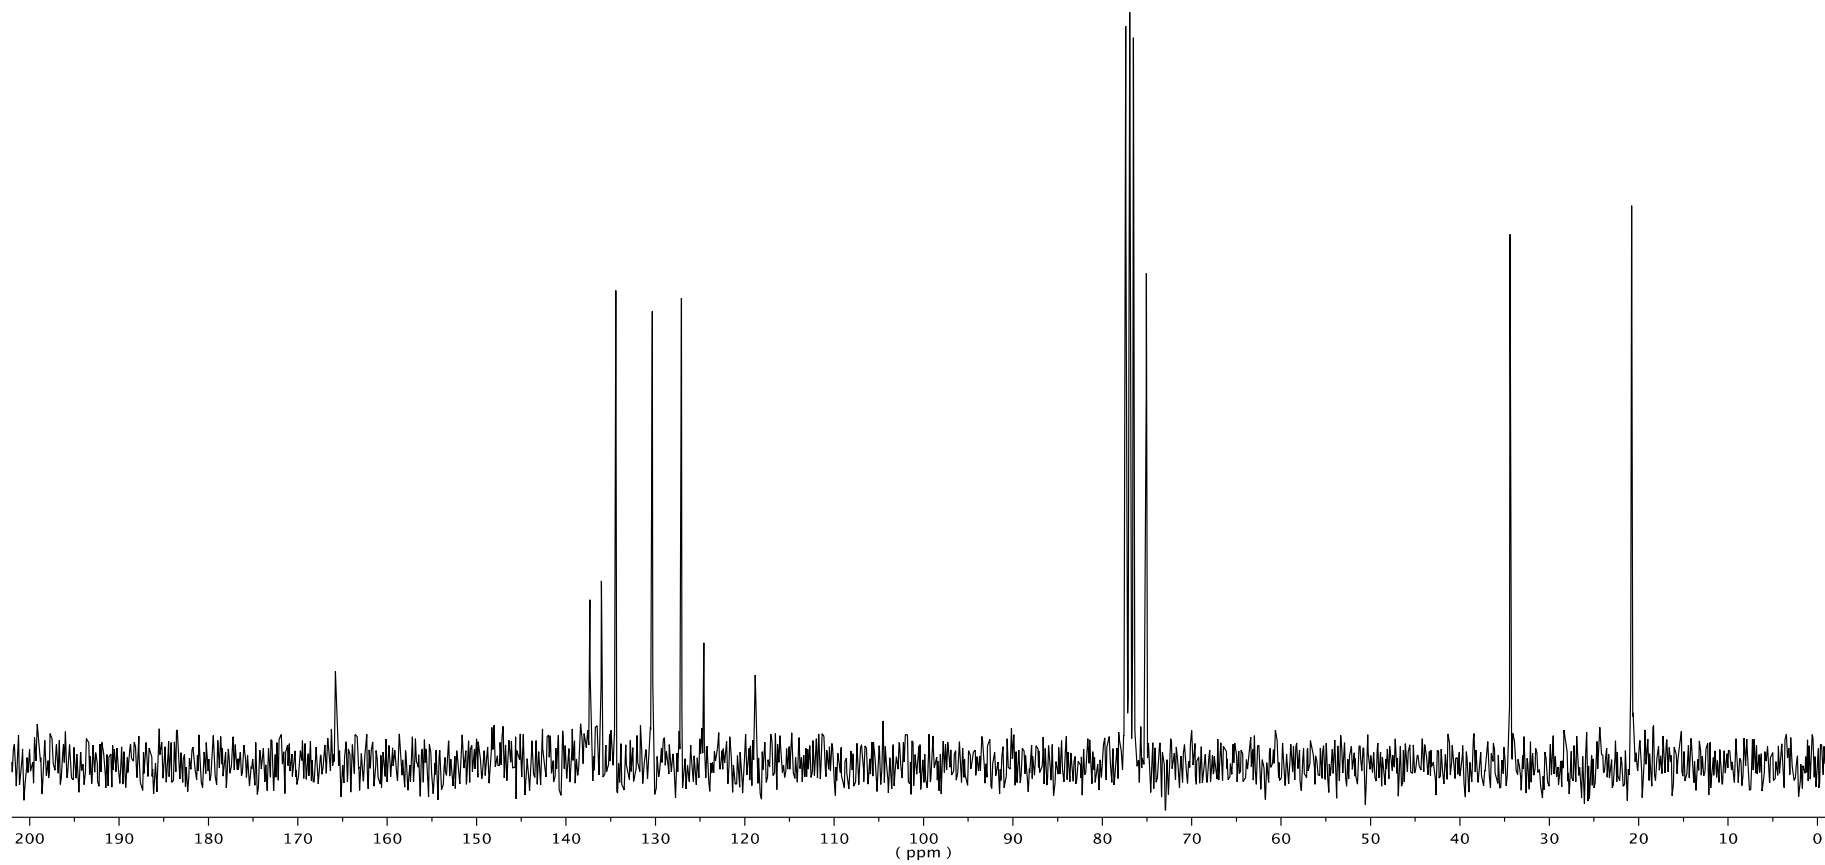



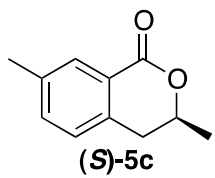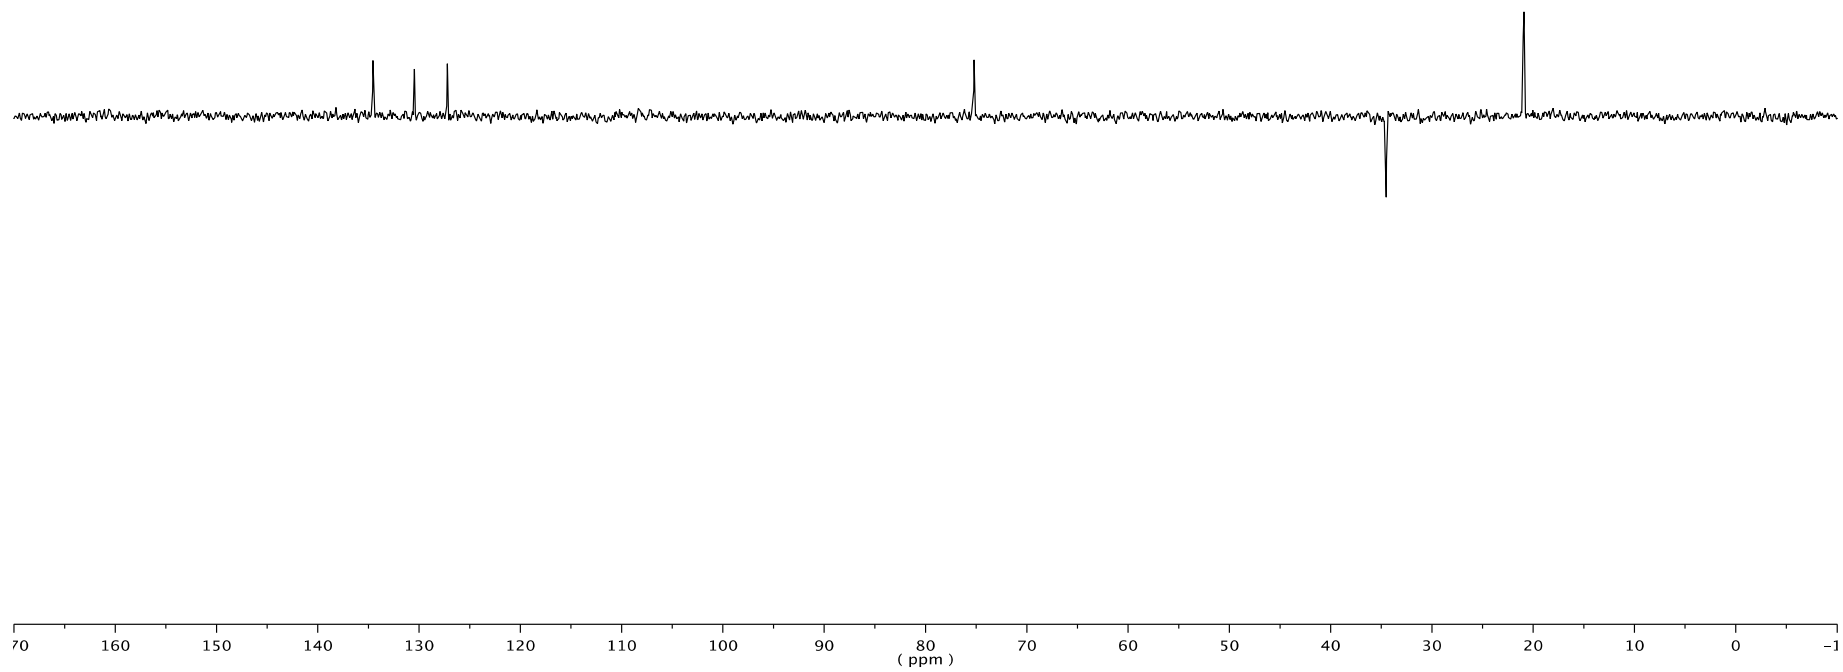

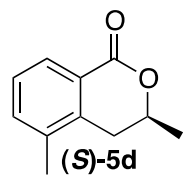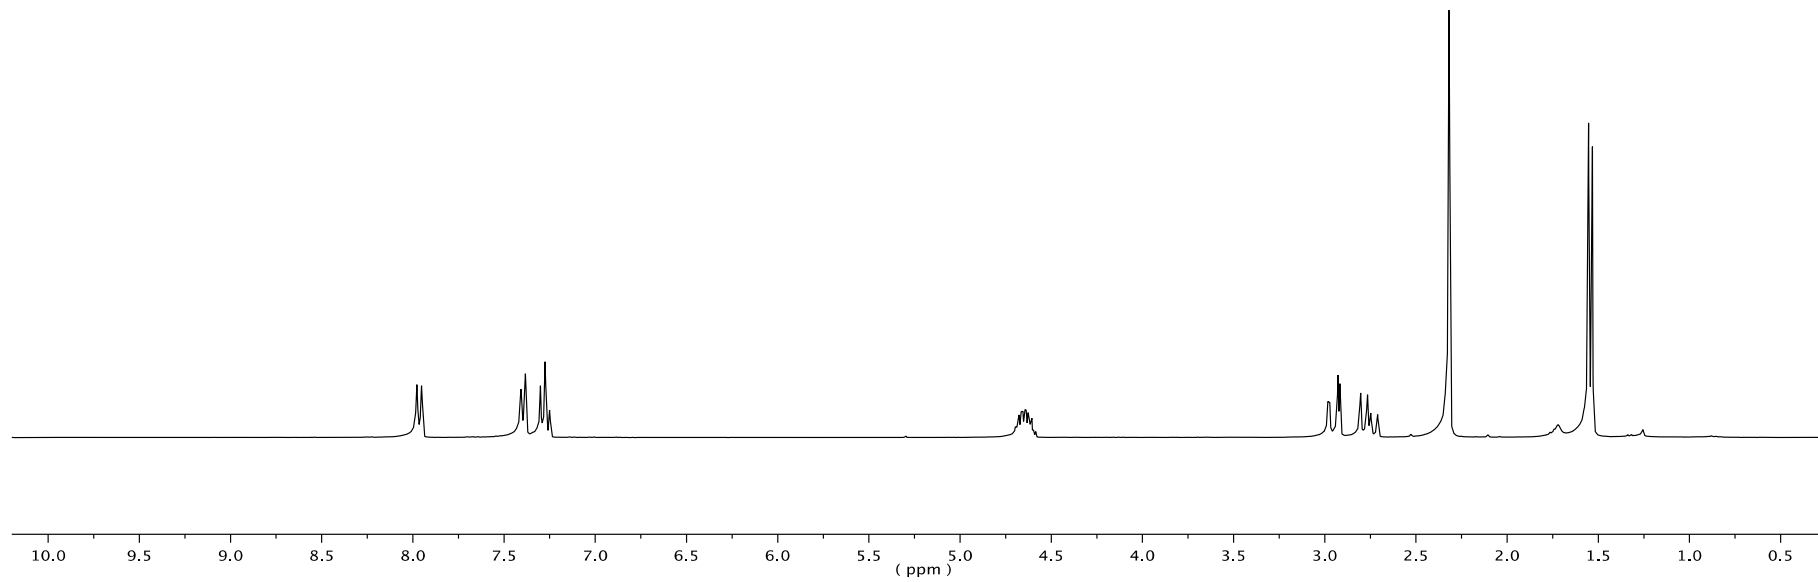

S66

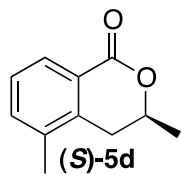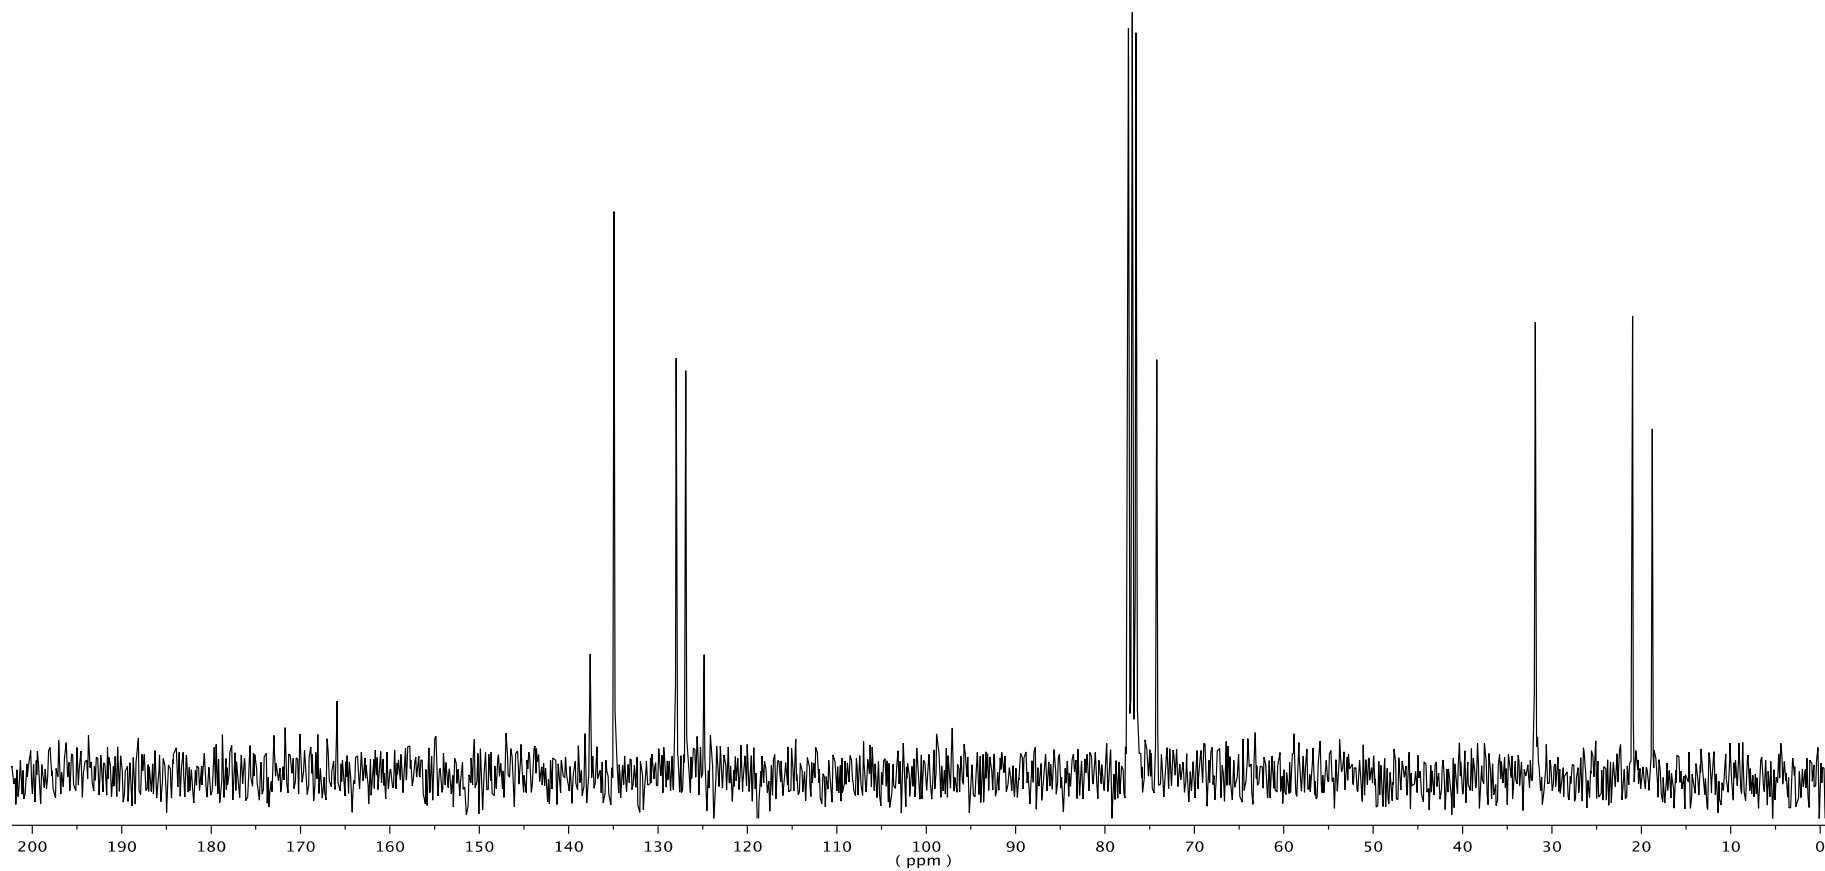

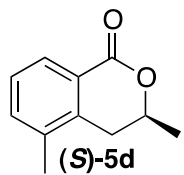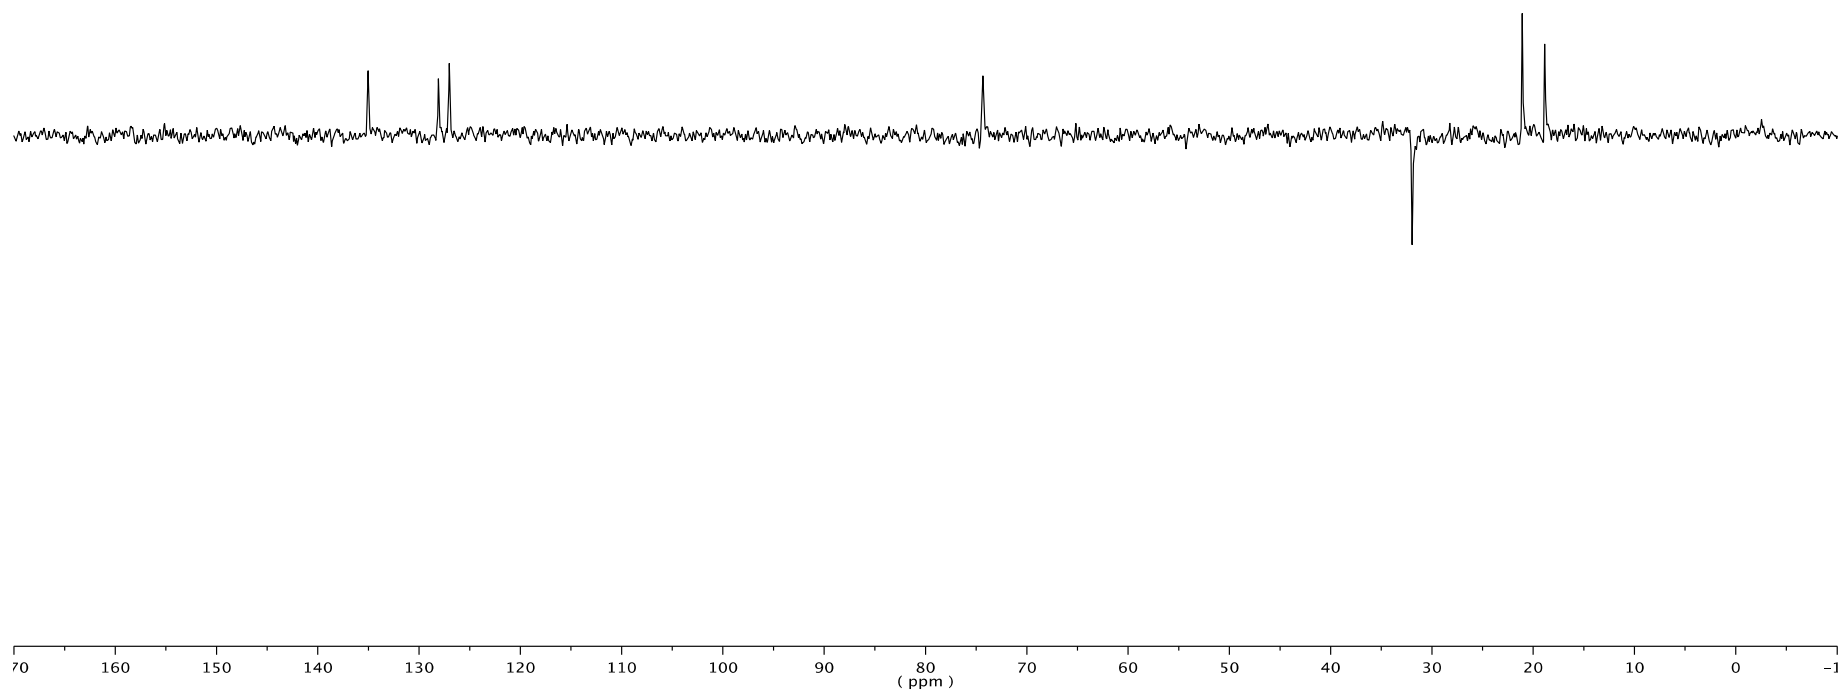

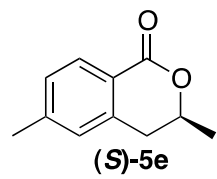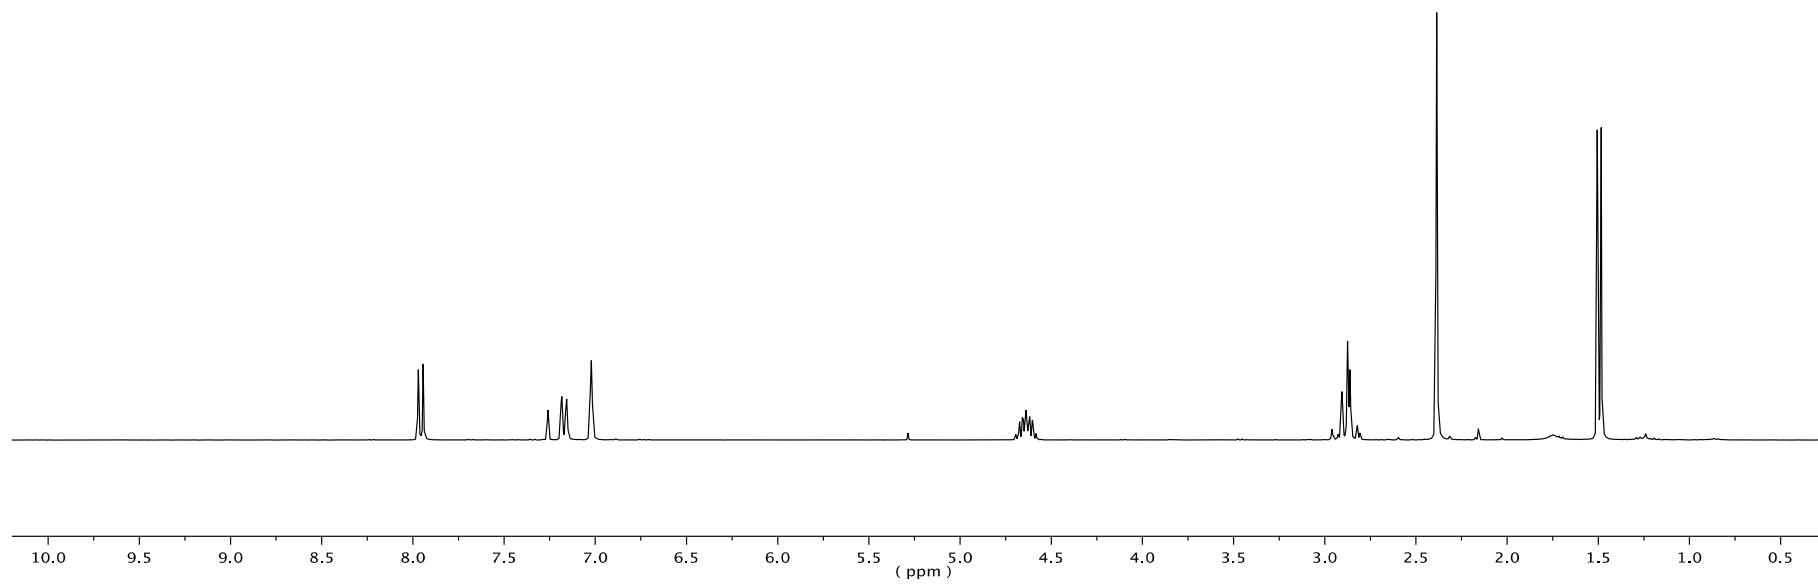

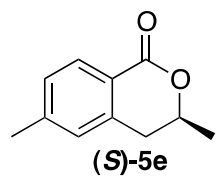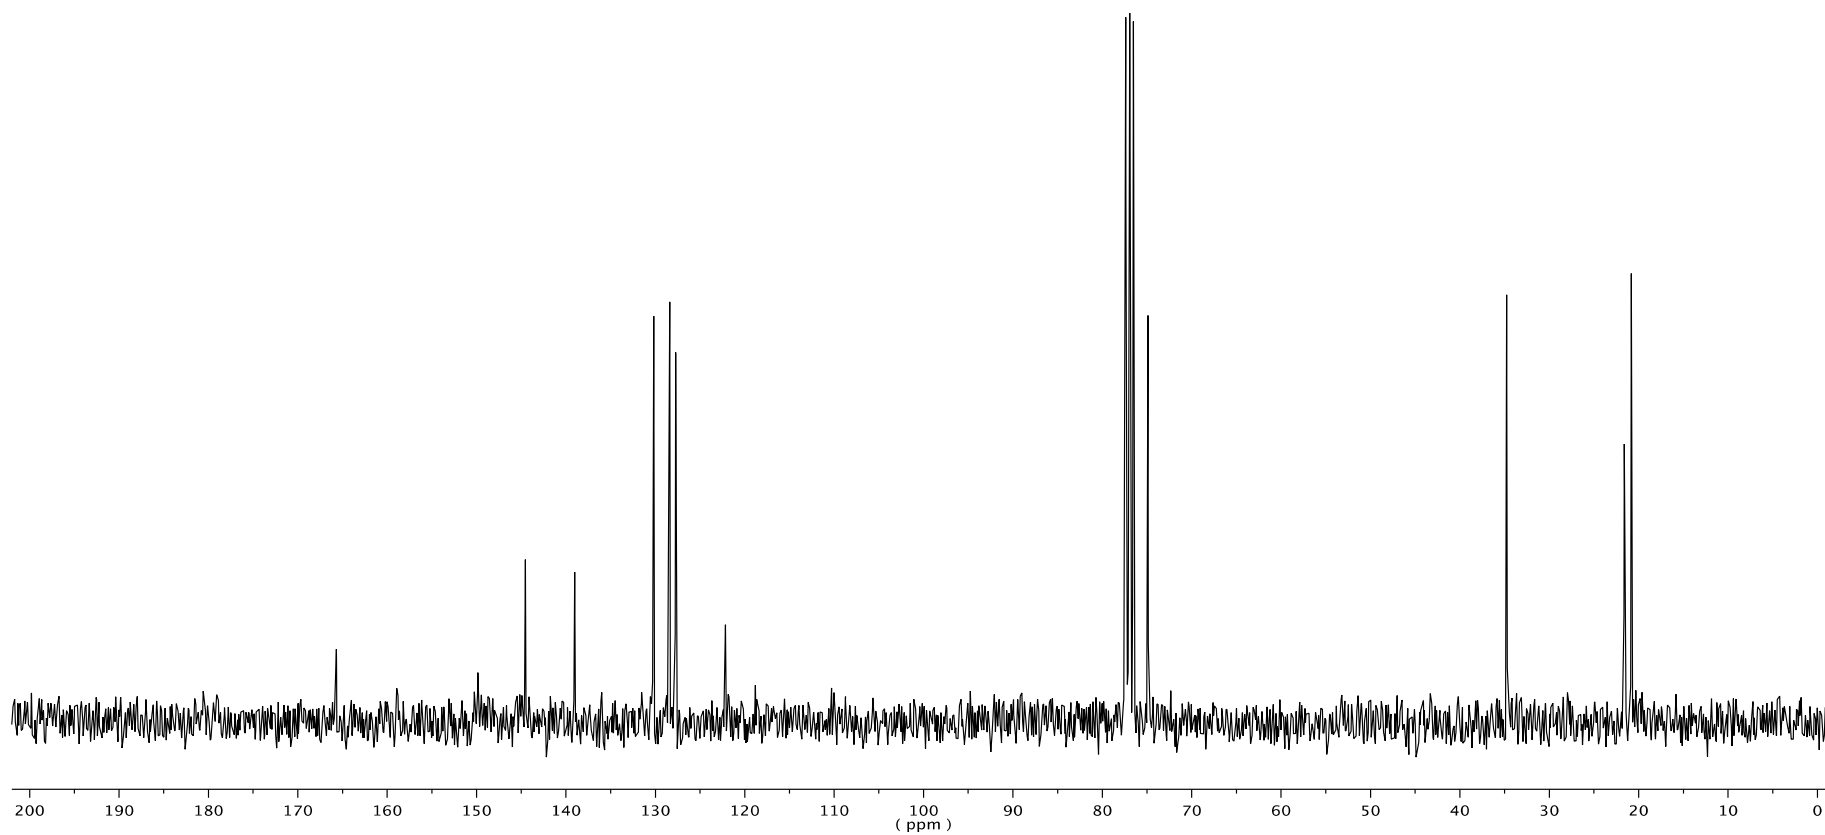

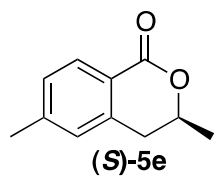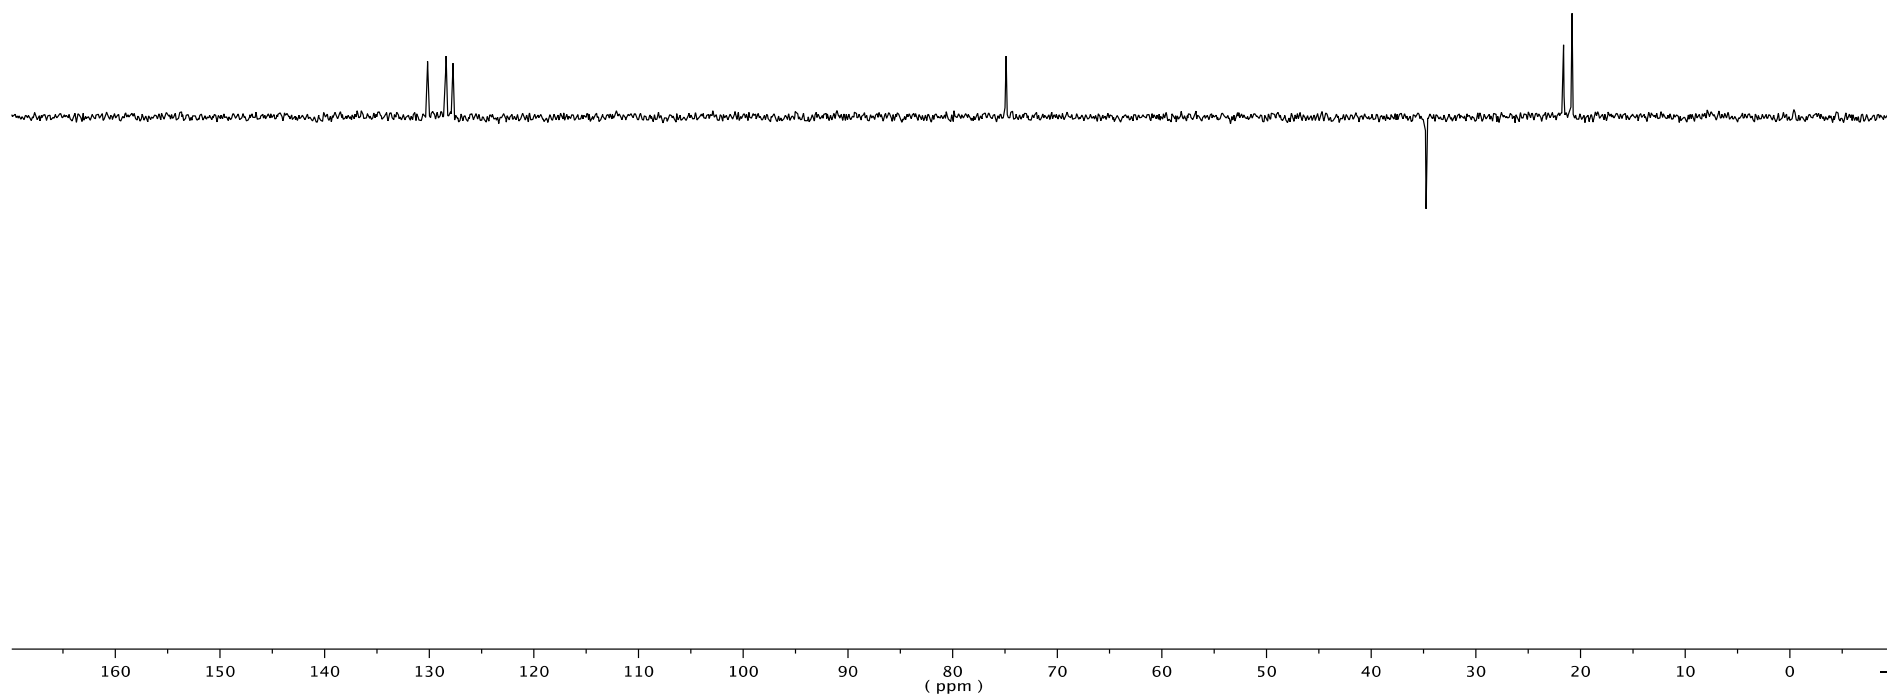

S71

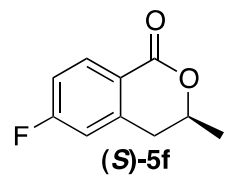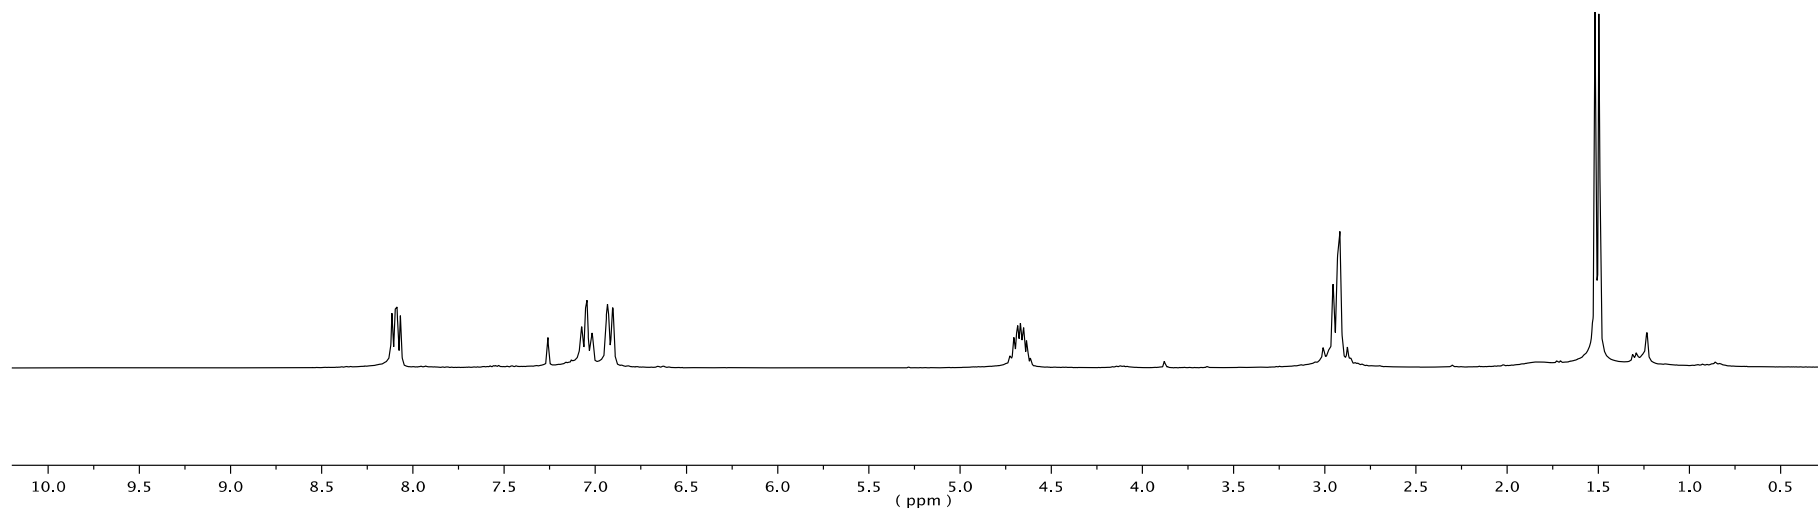



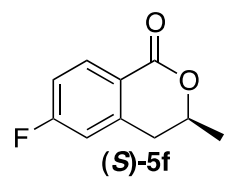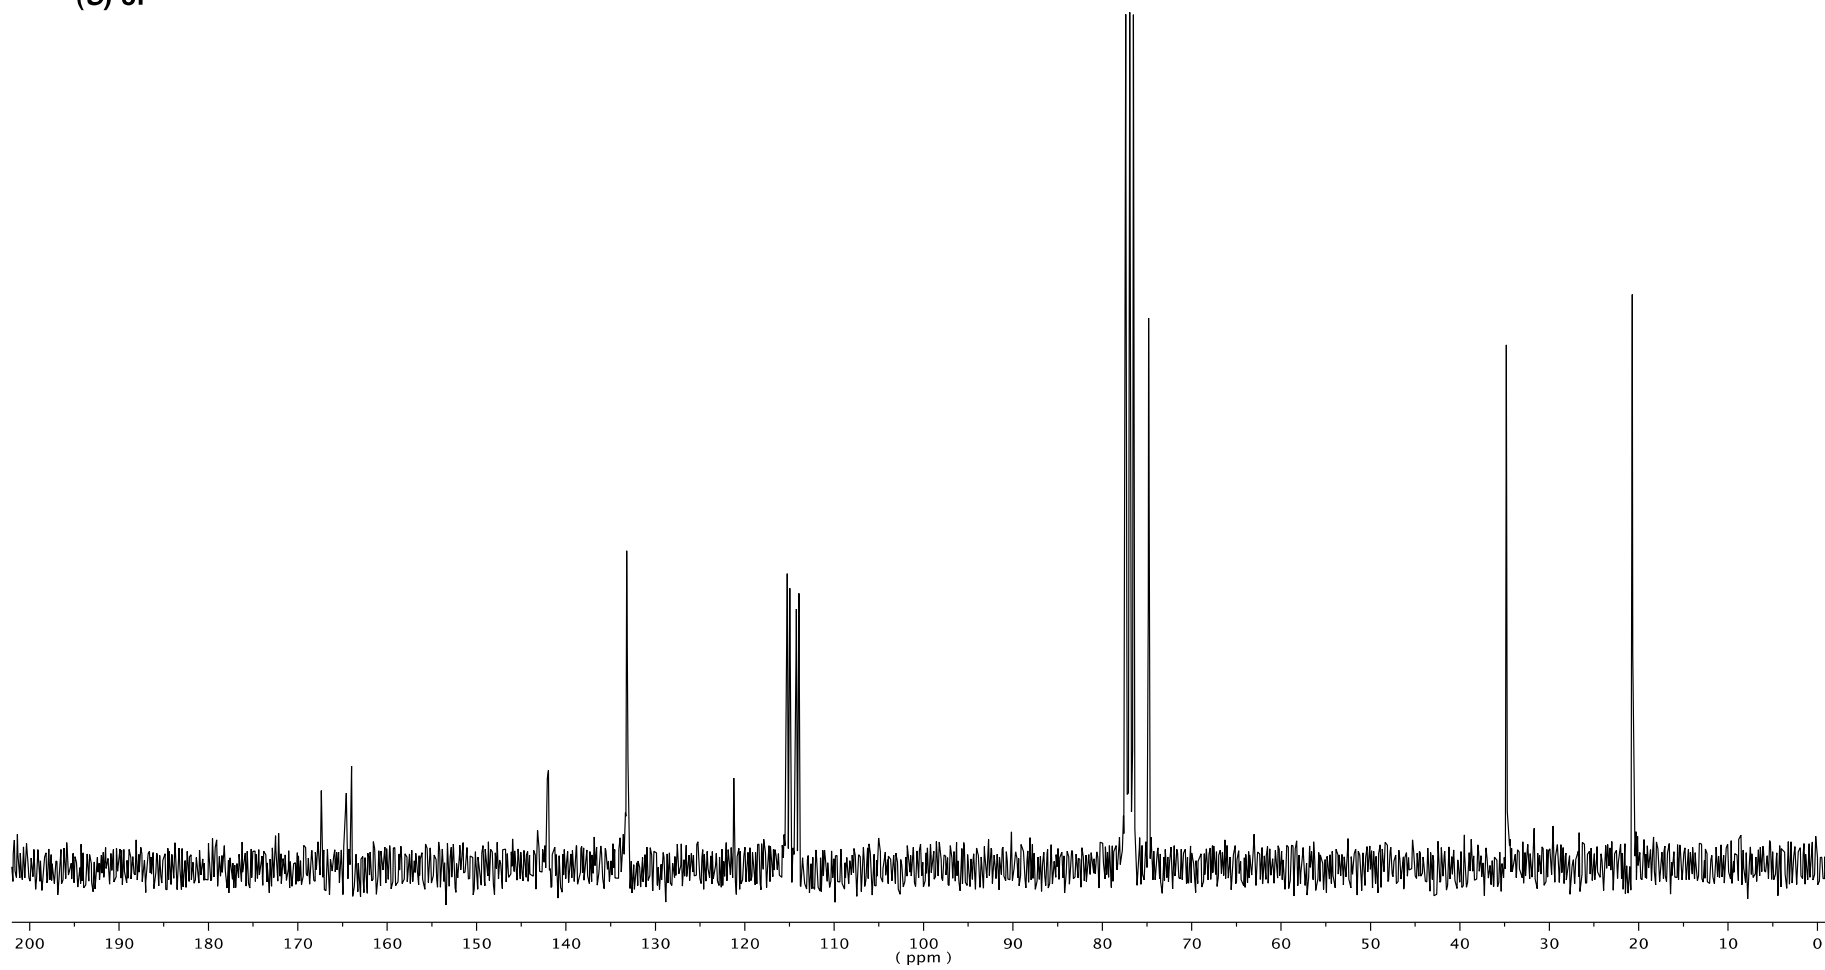

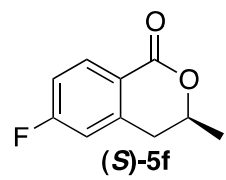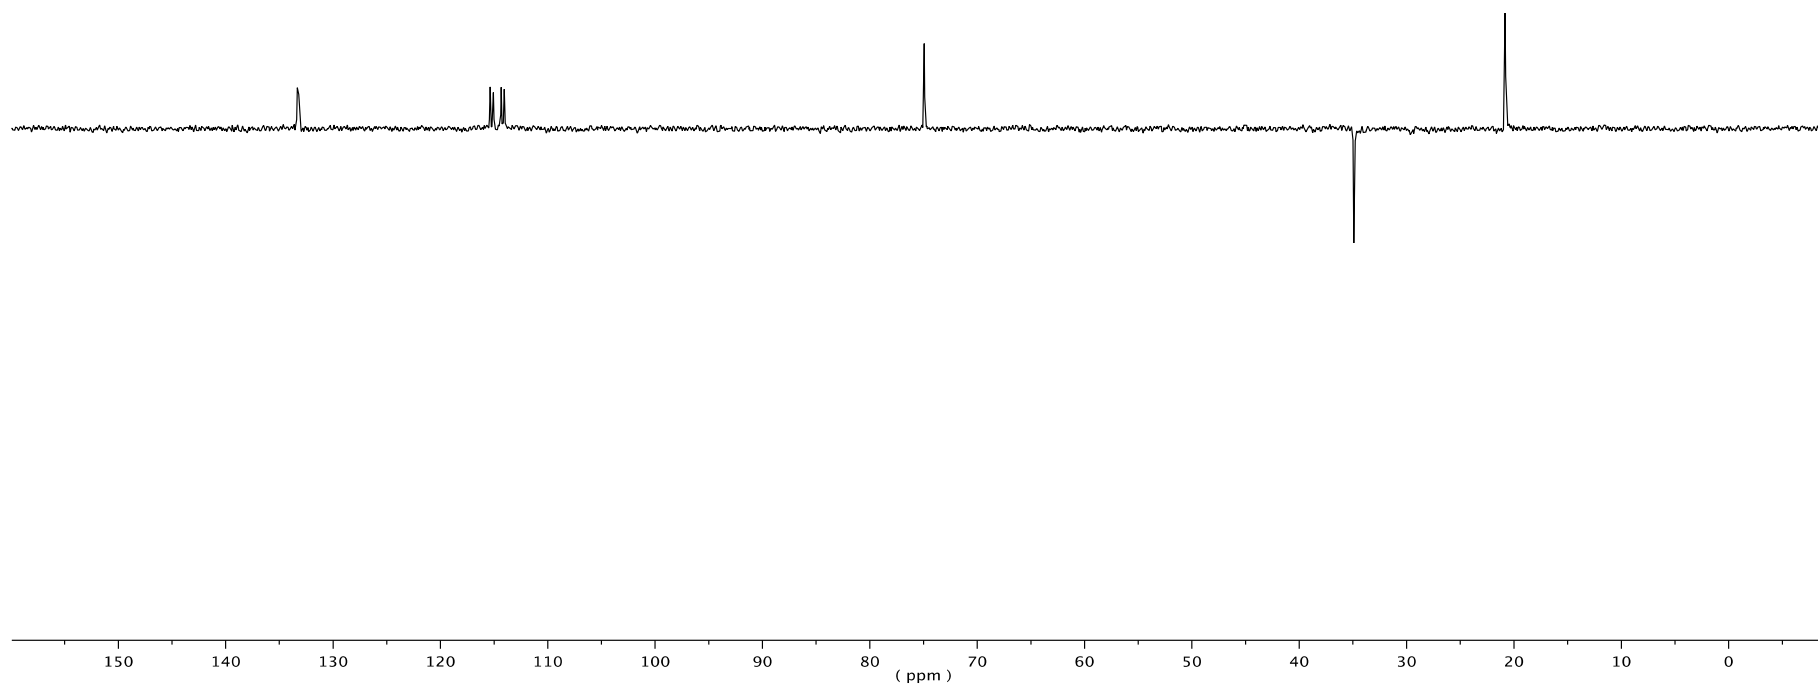

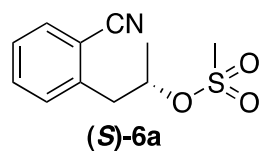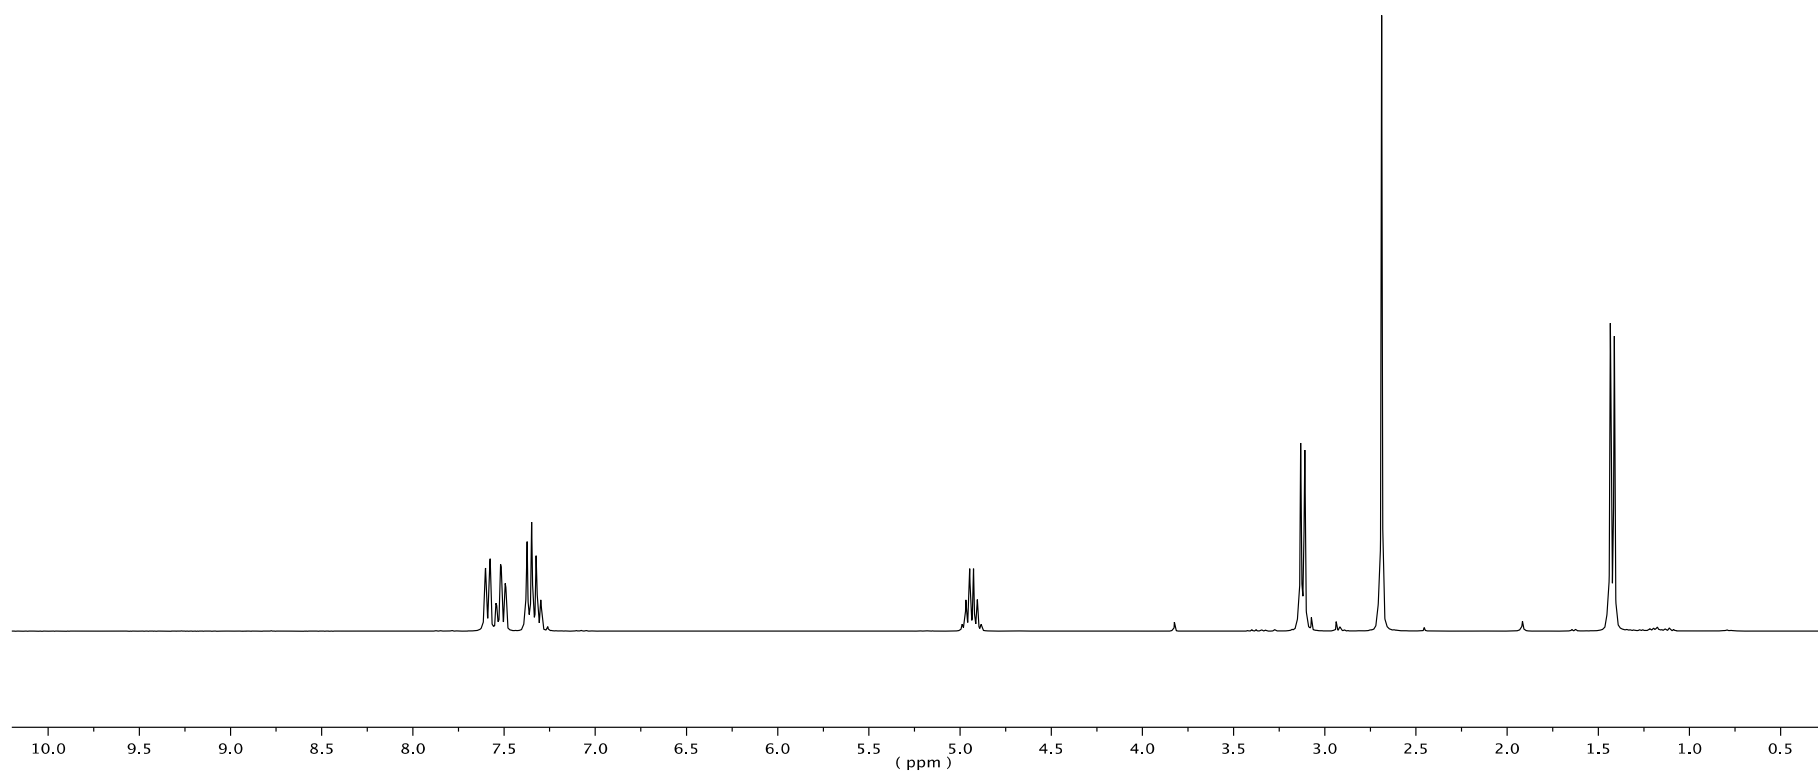

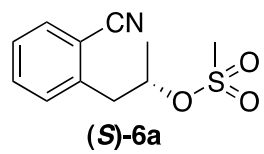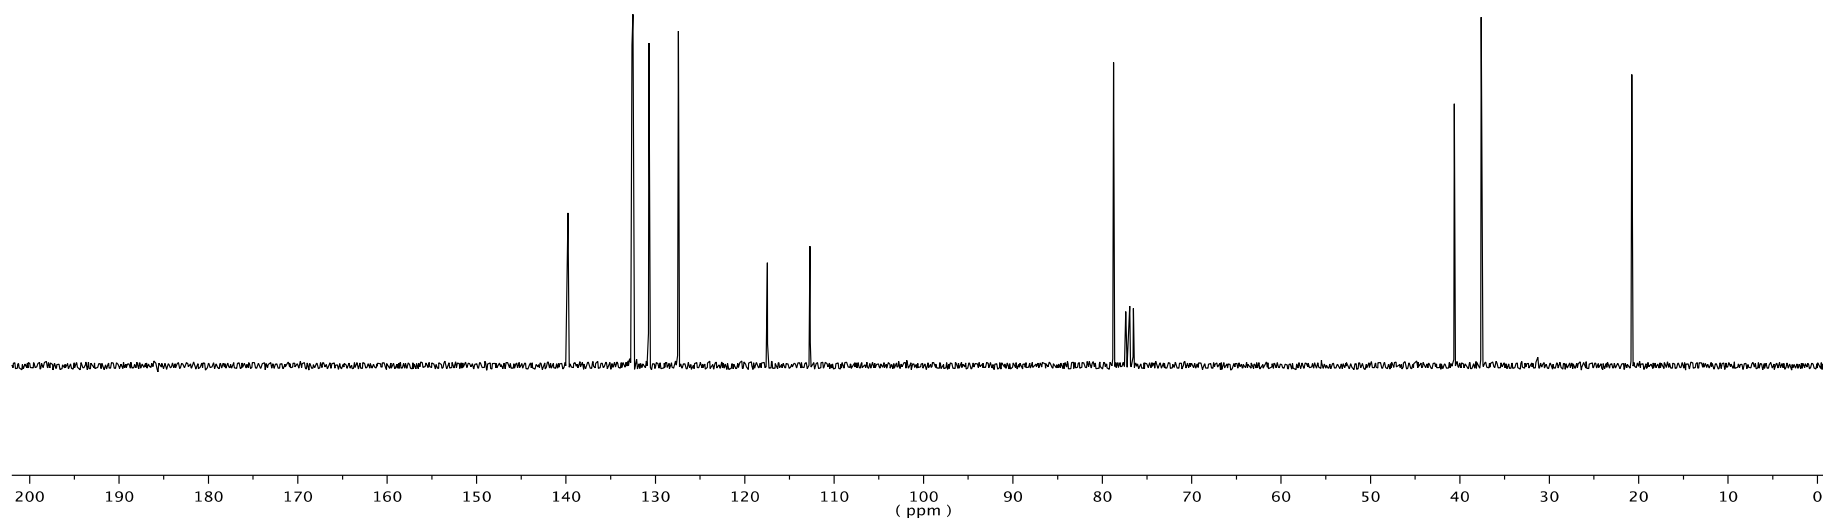

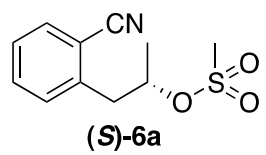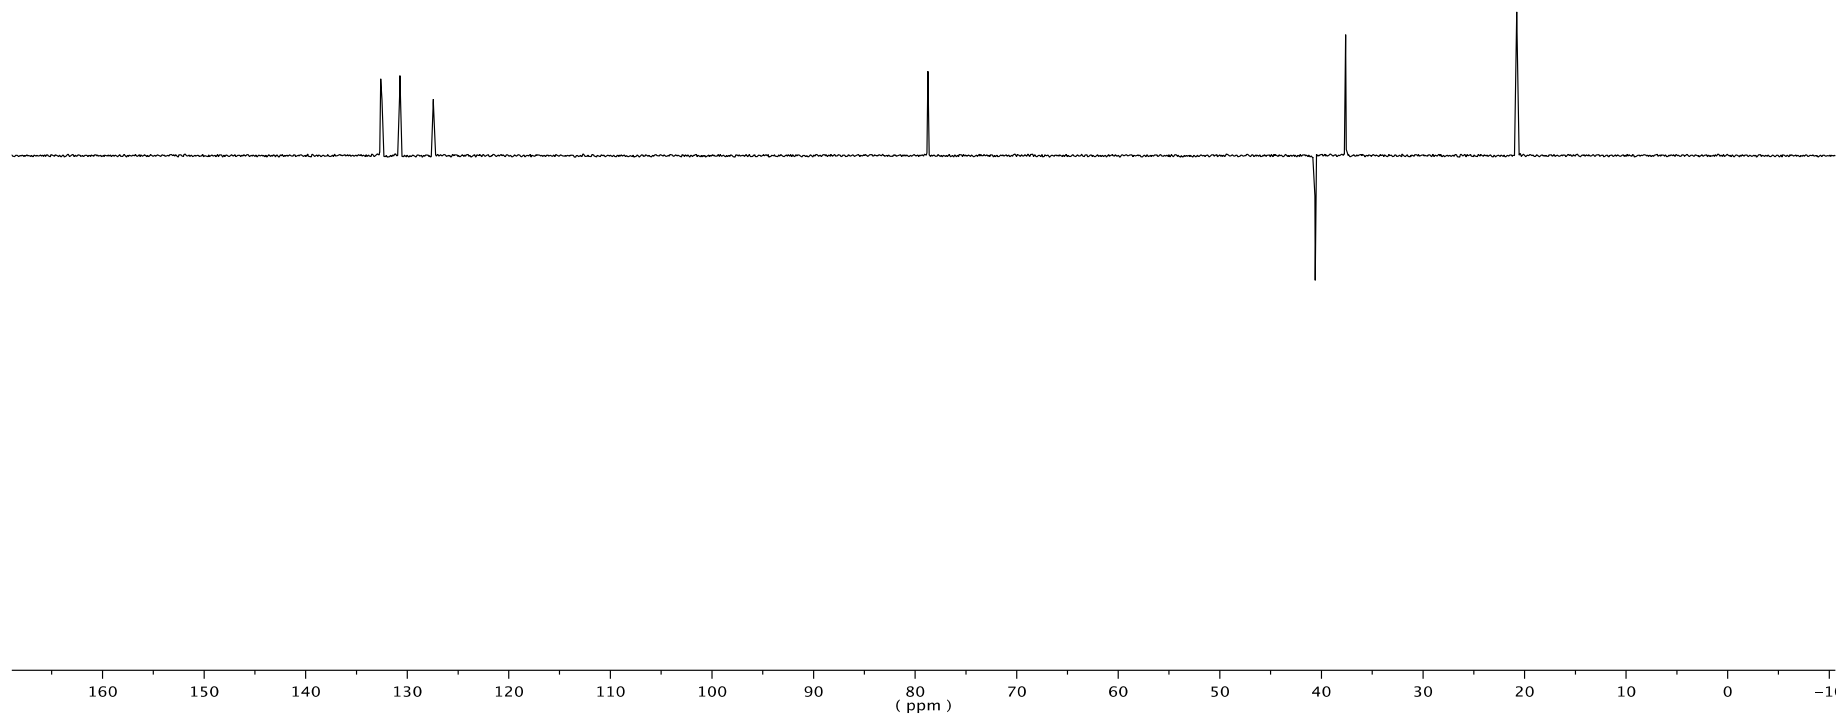

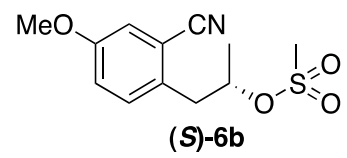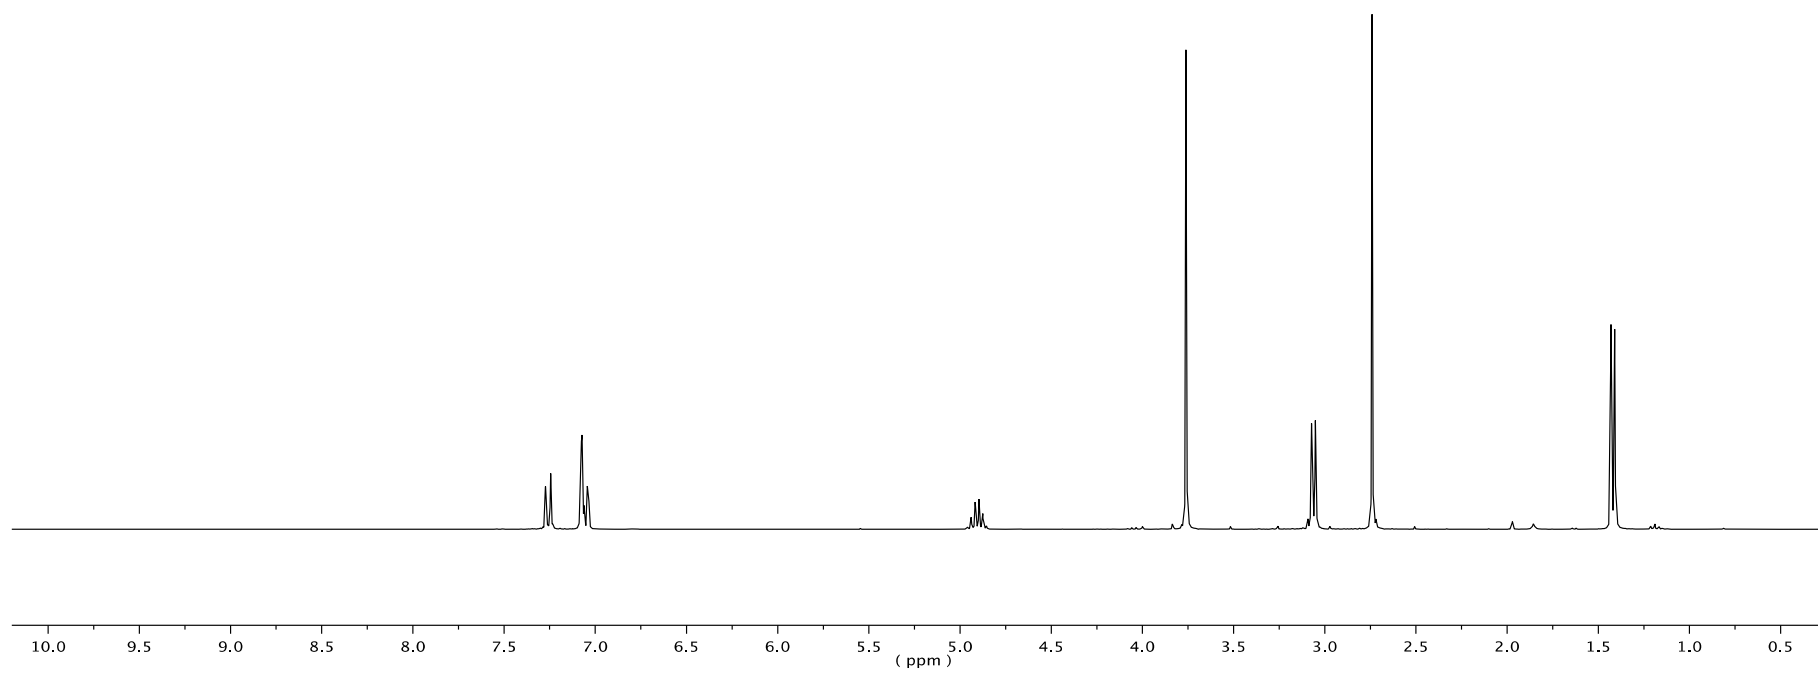

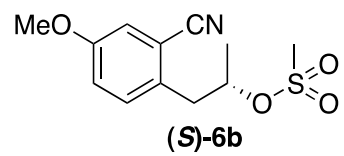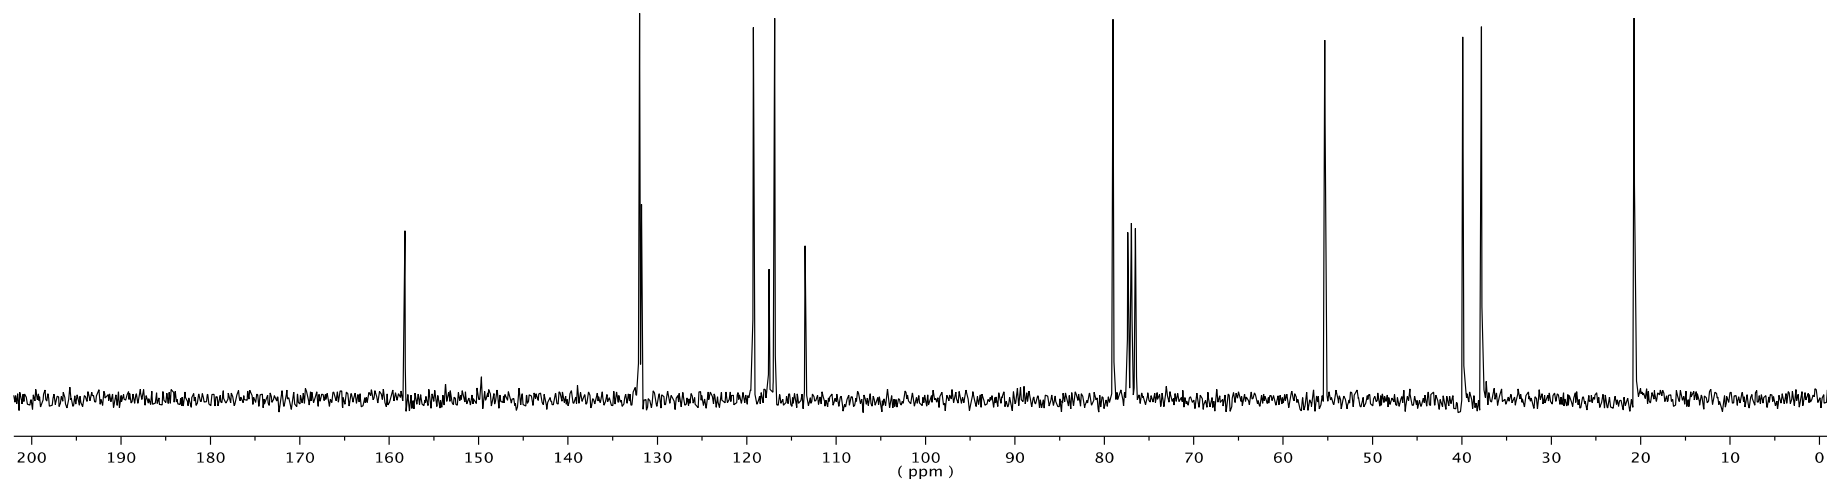

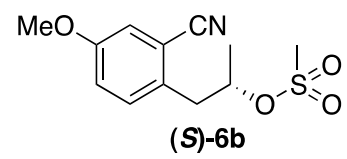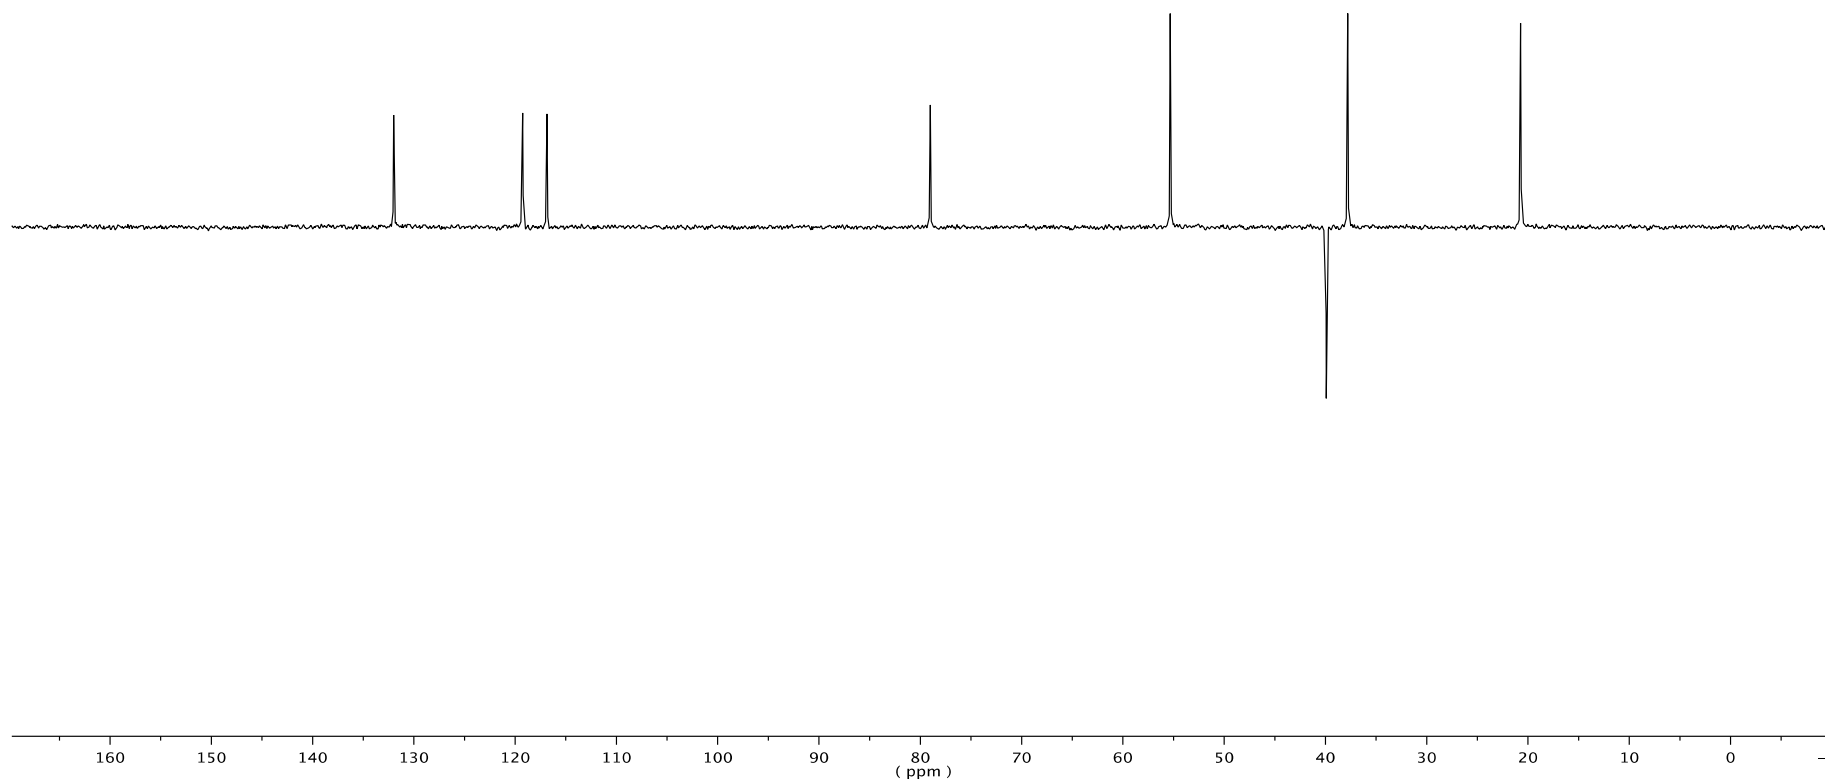

S80



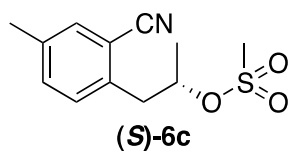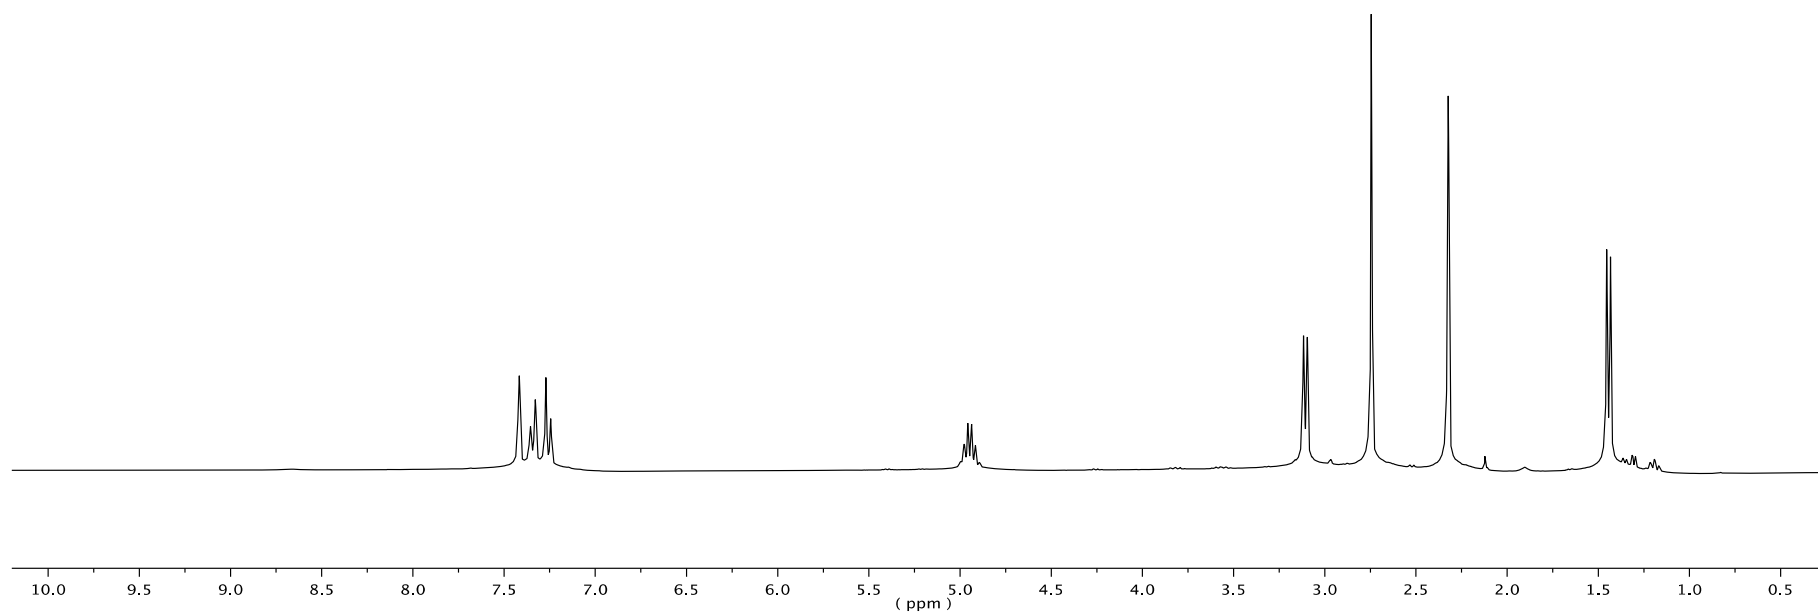

S81

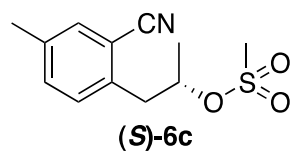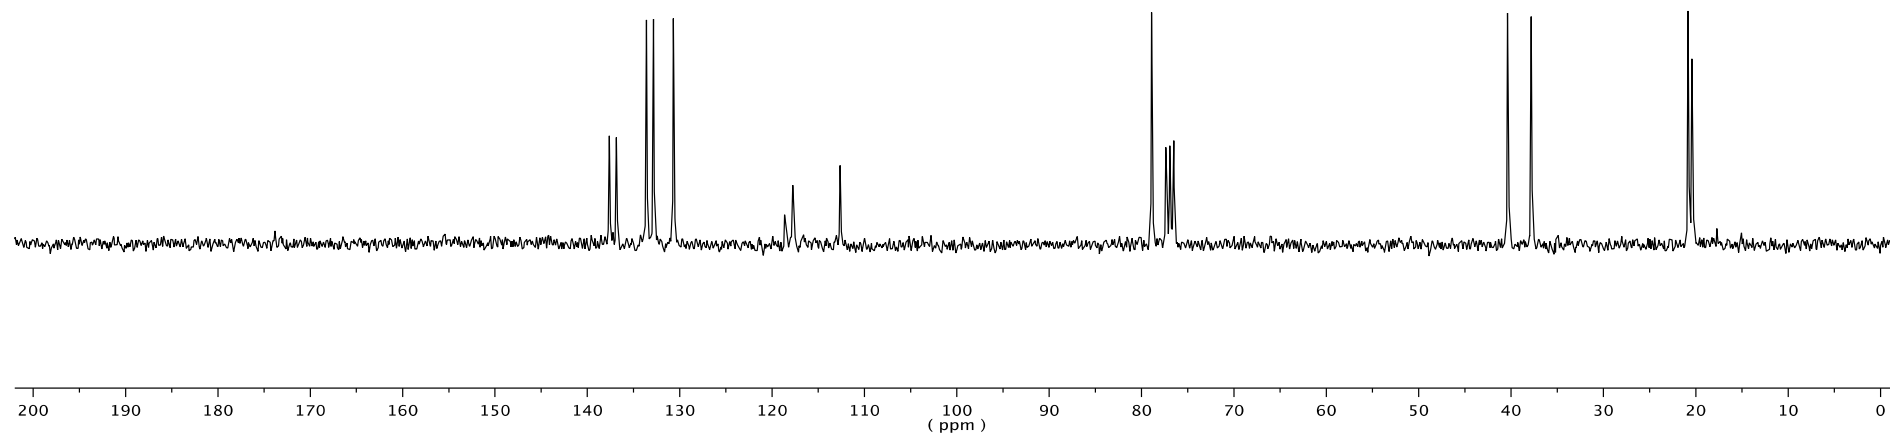

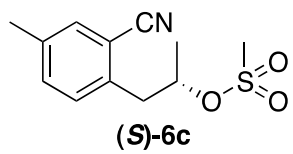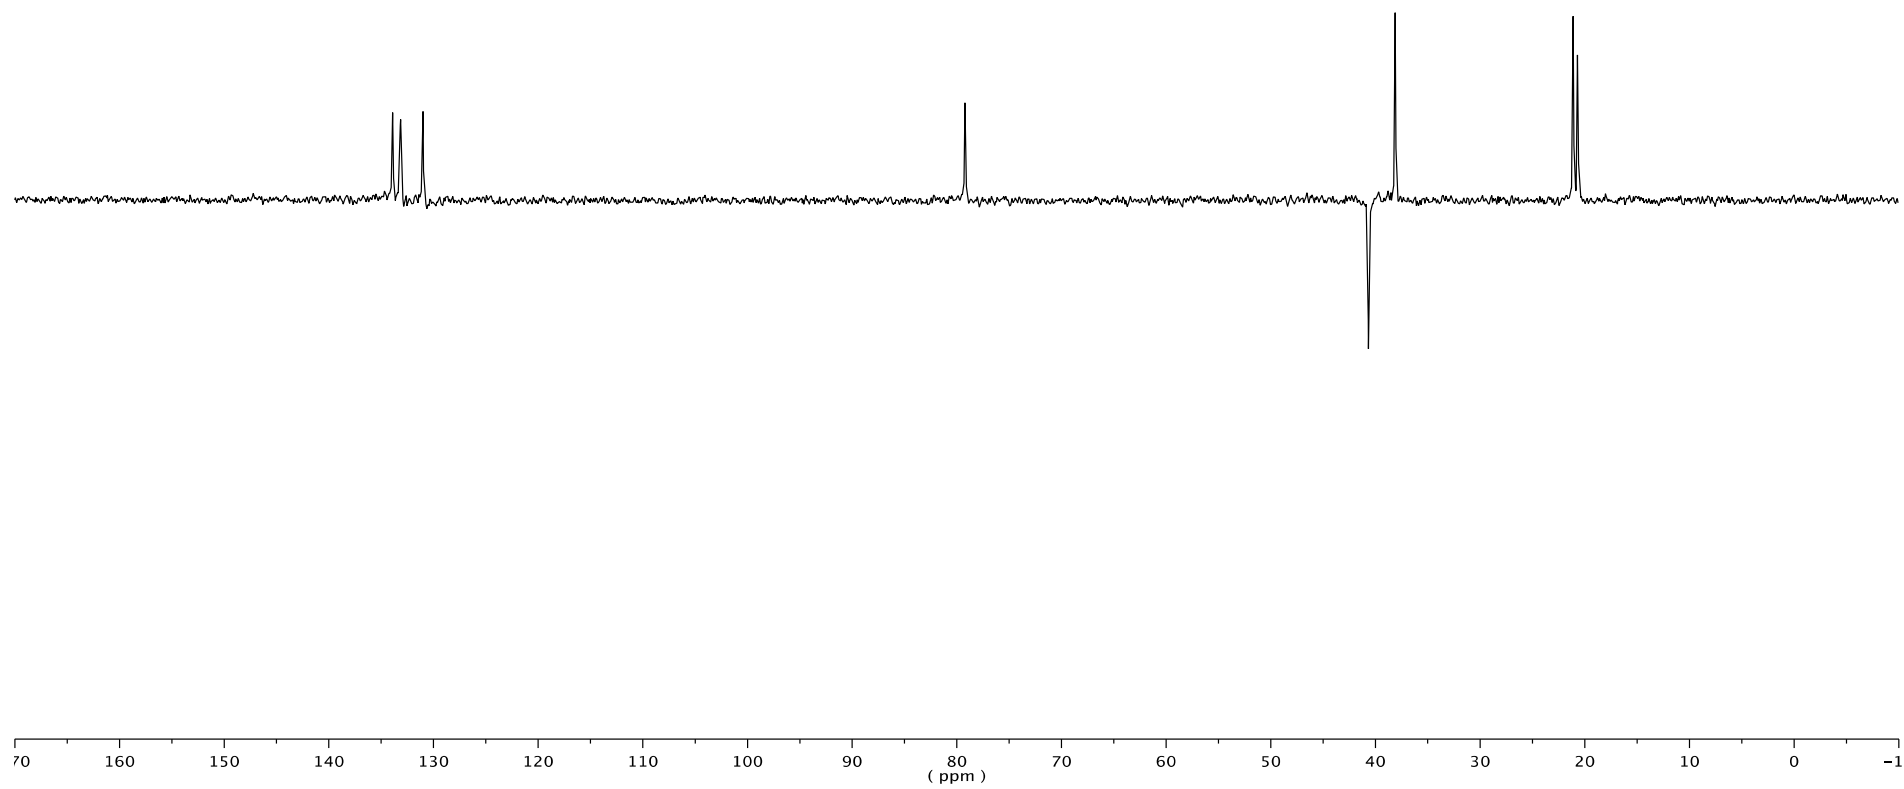

S83

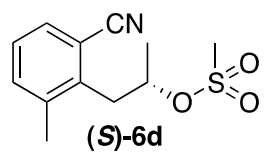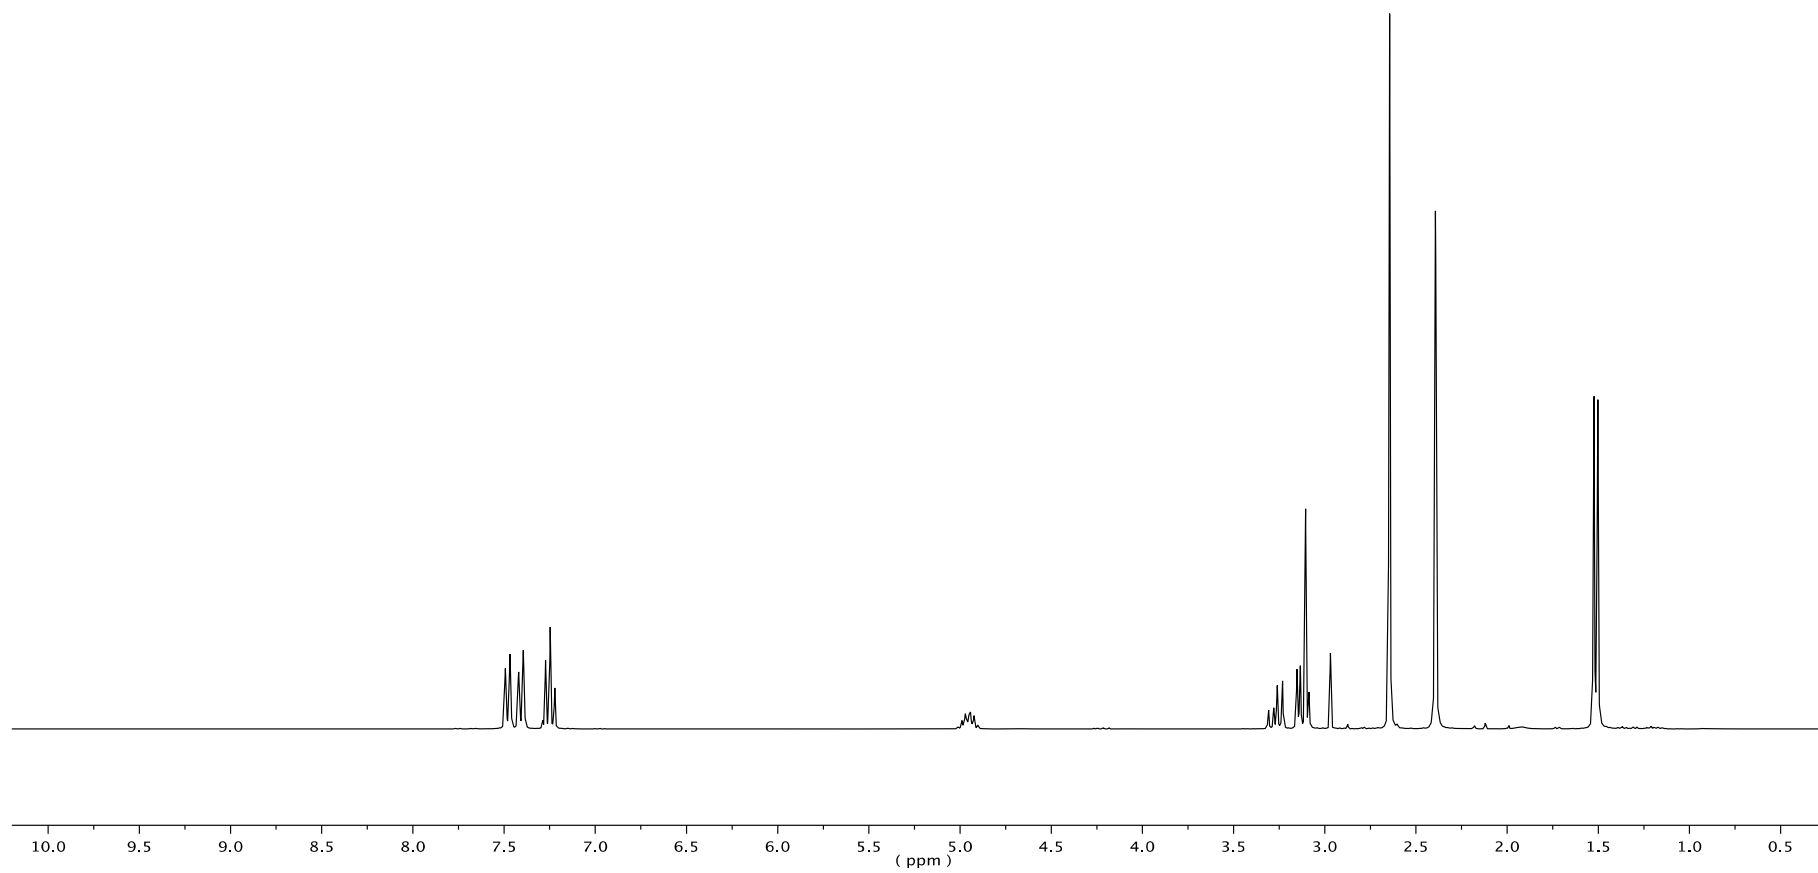

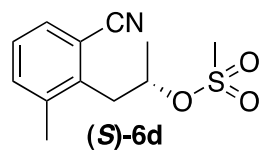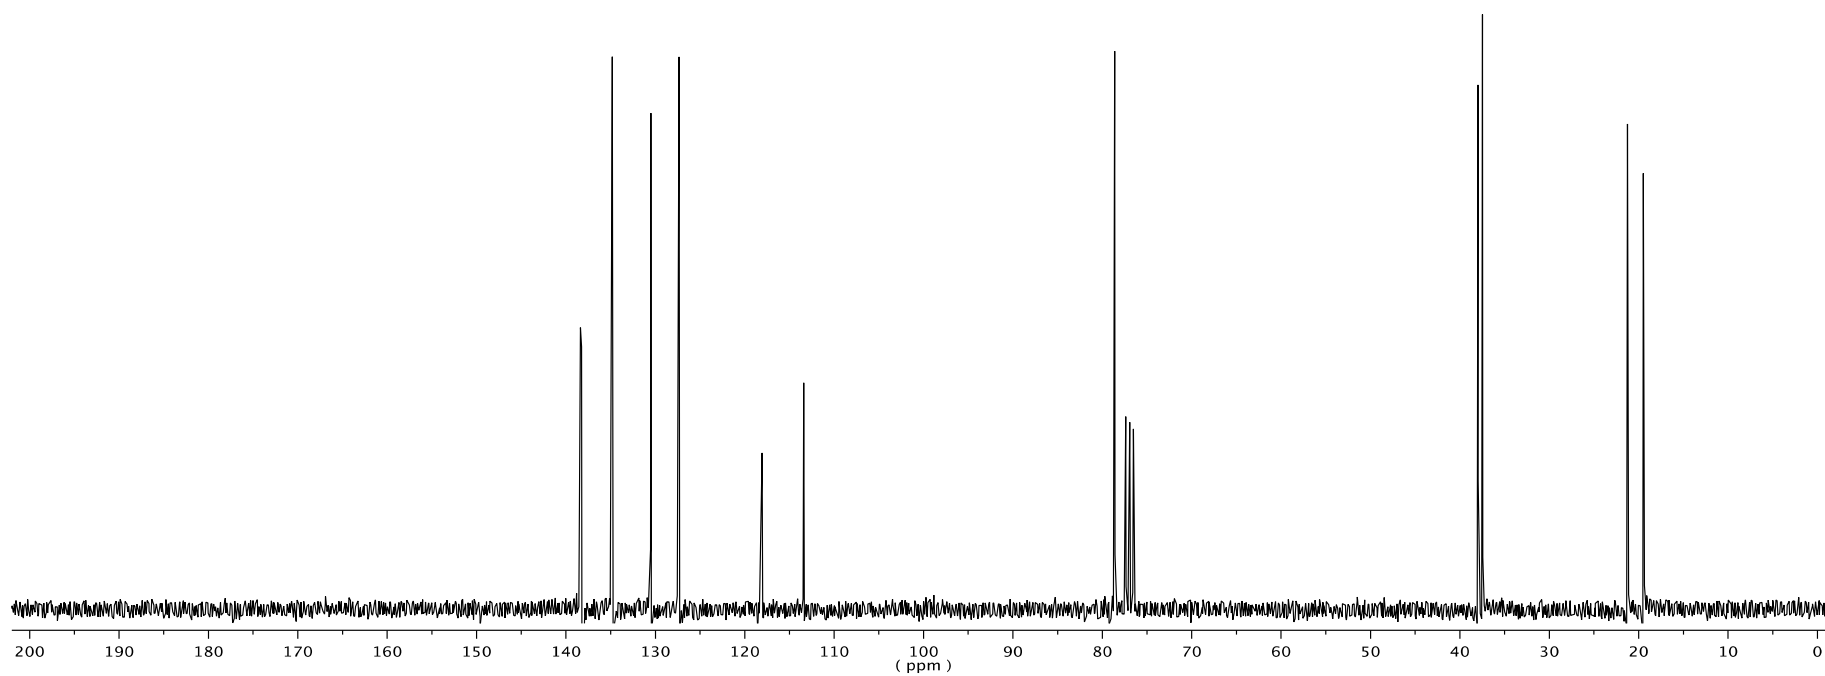

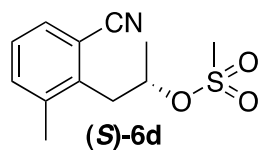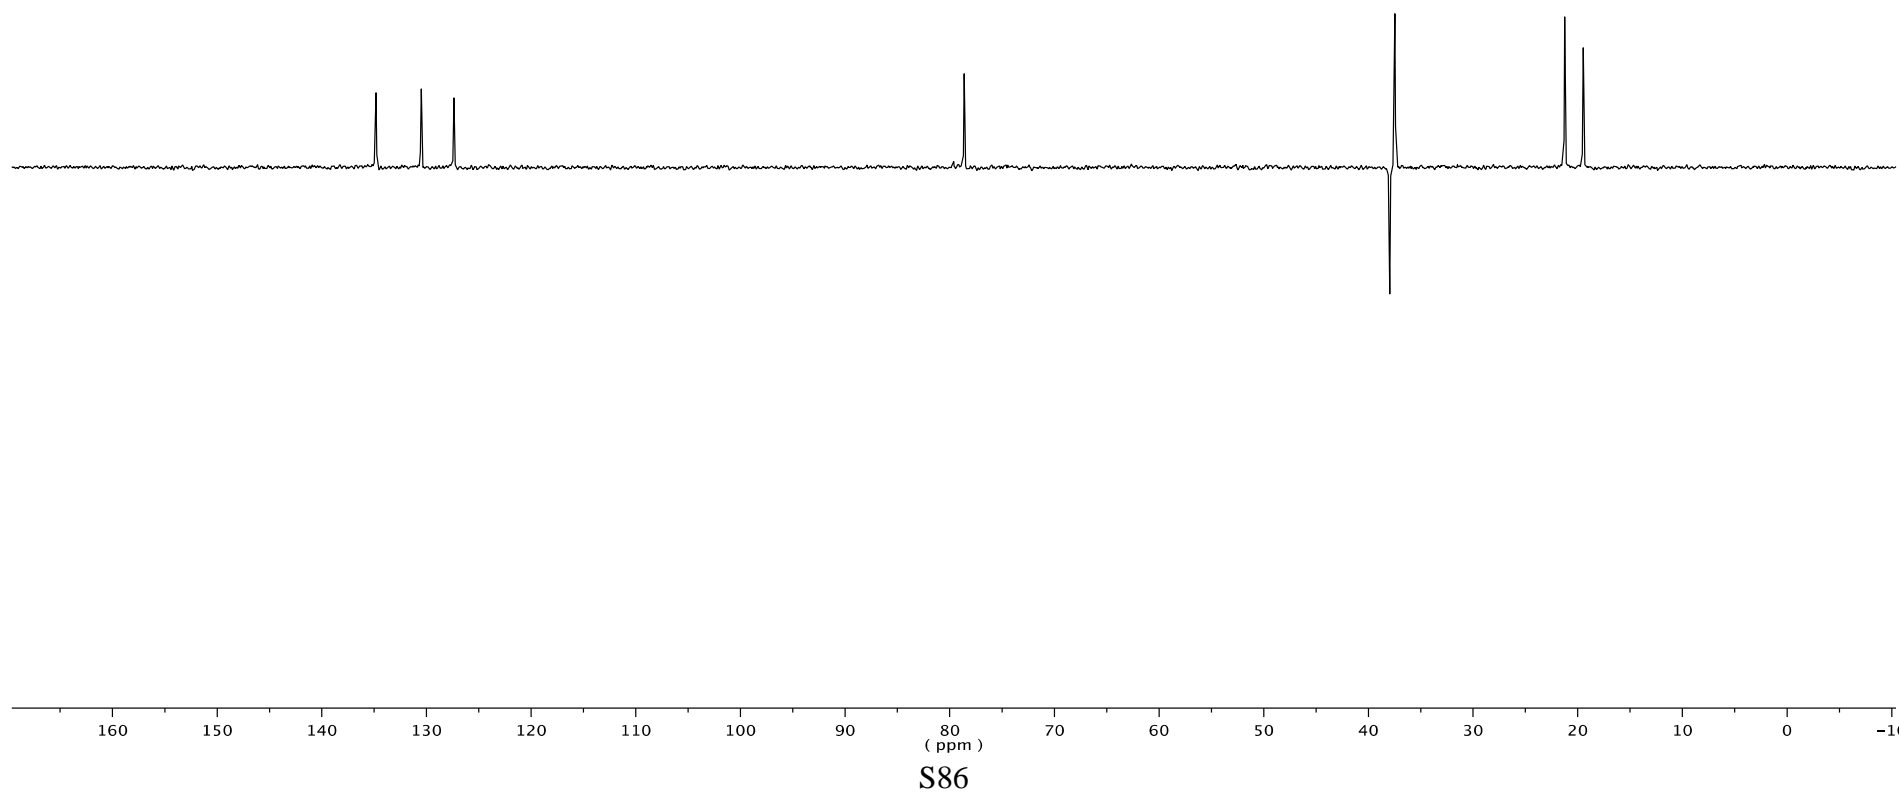

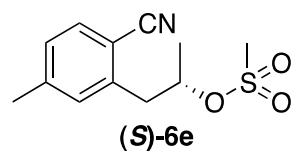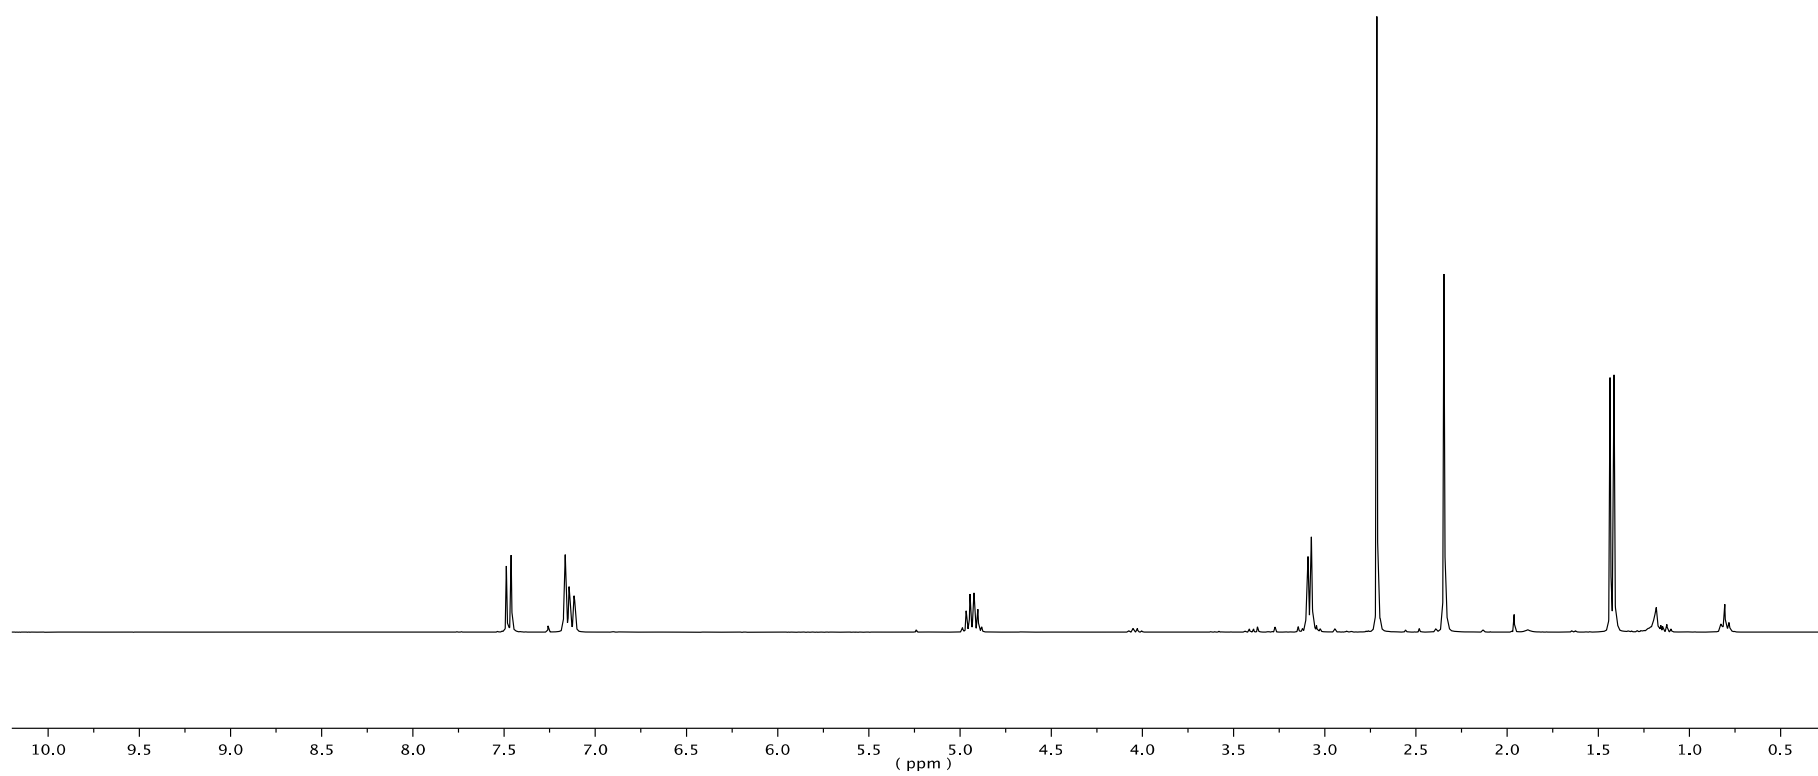

S87

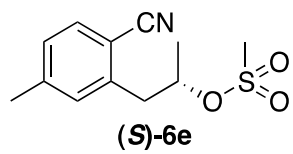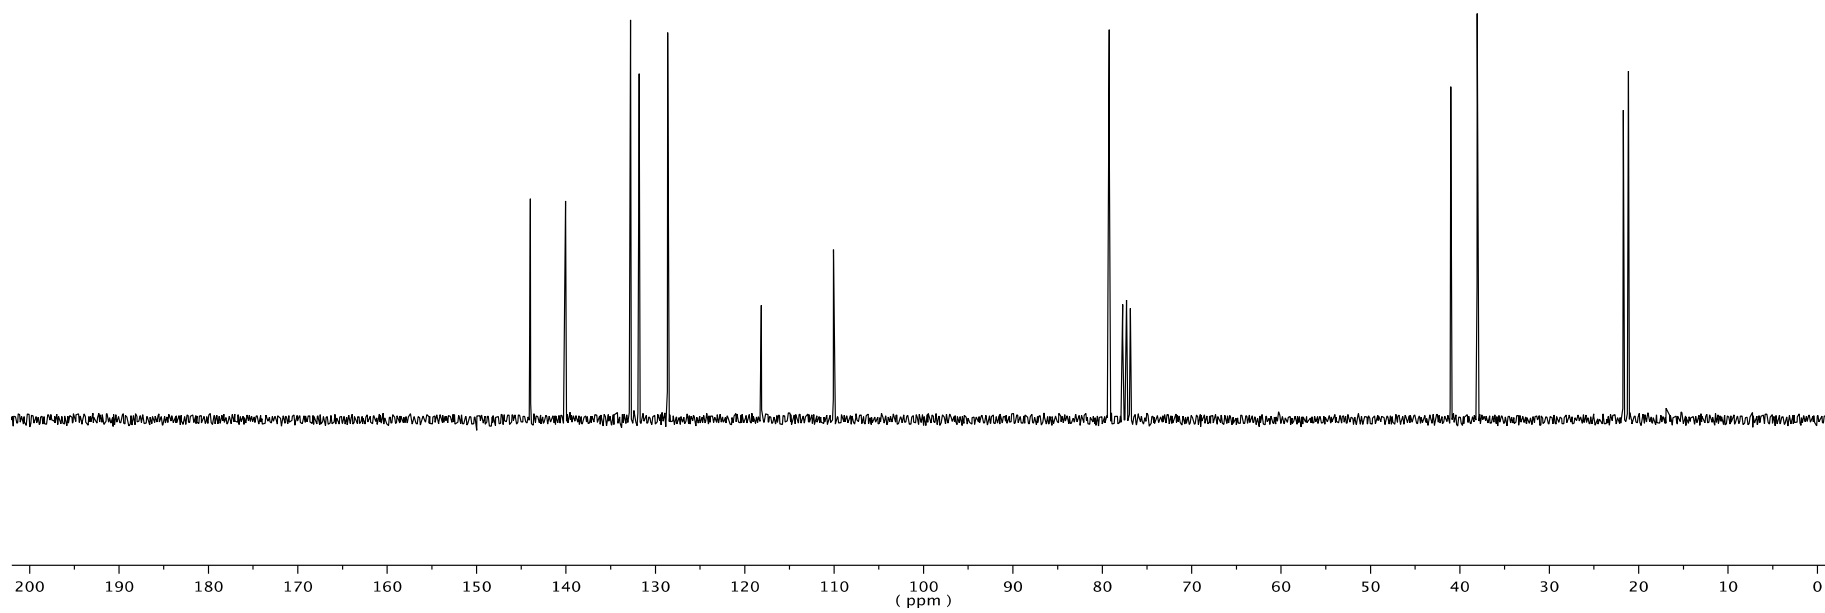



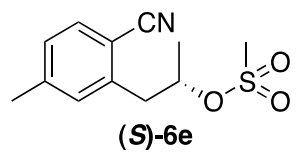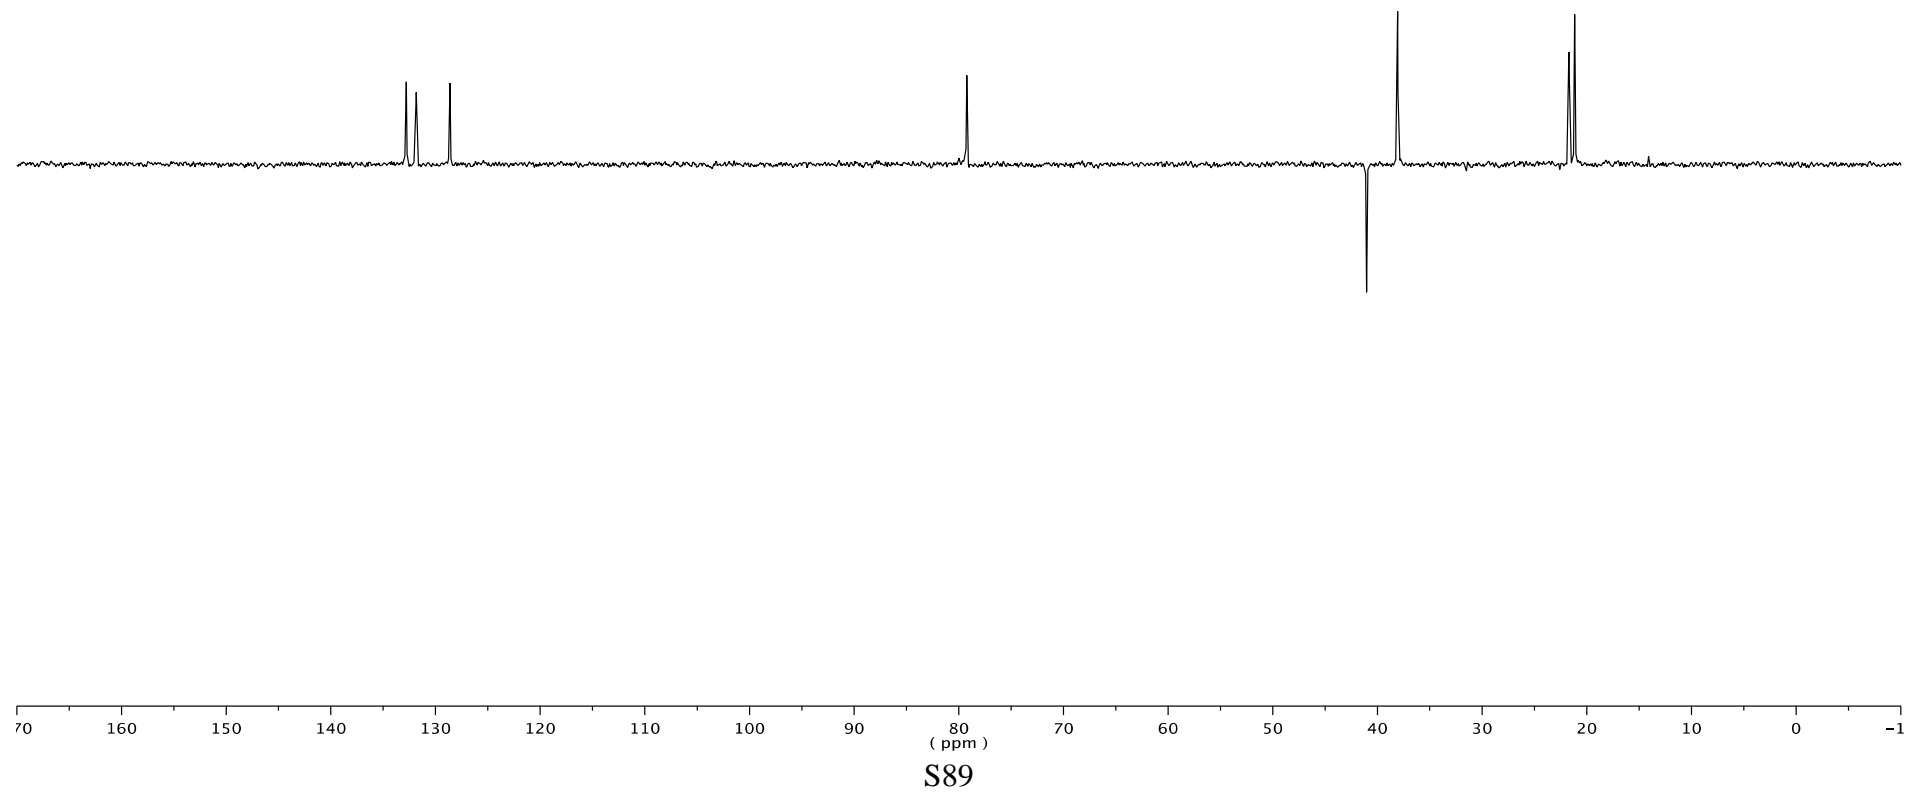

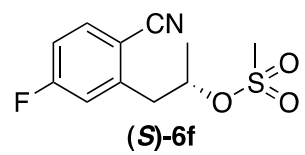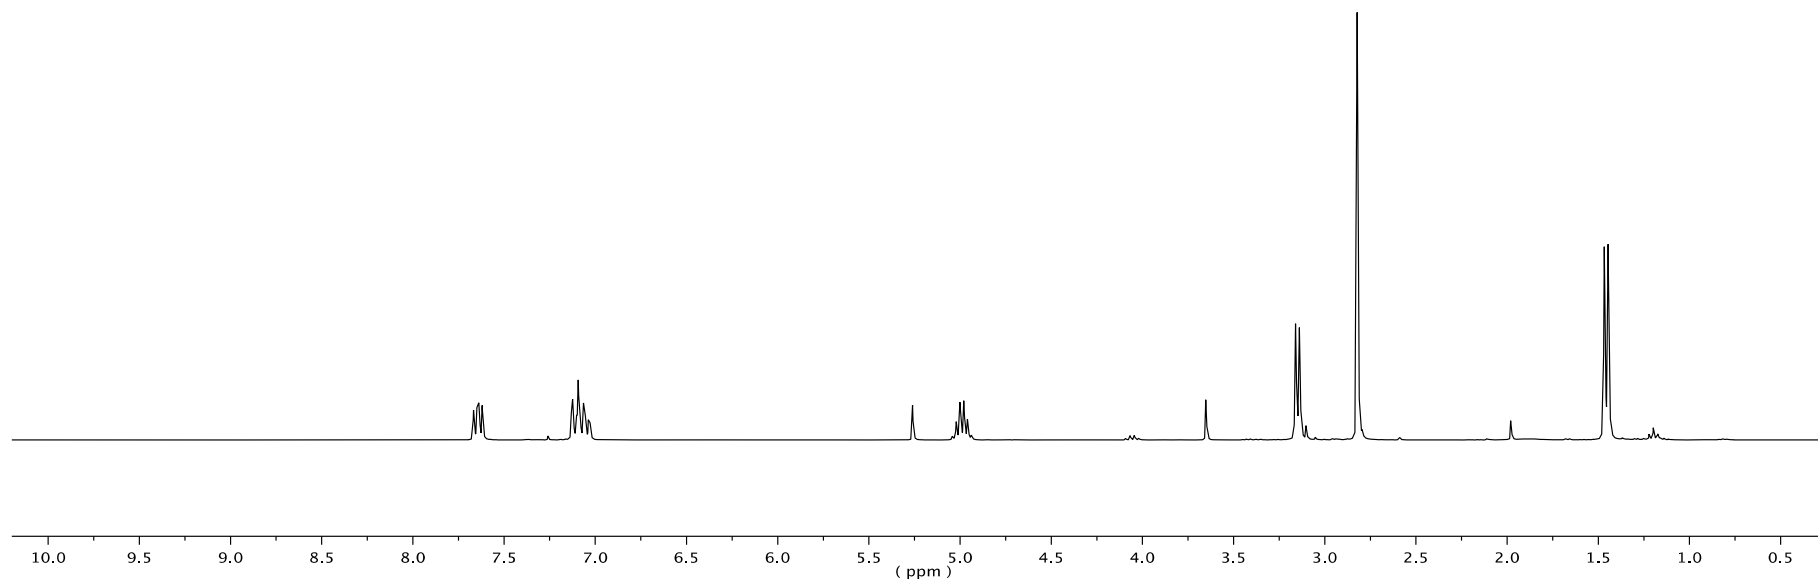

S90

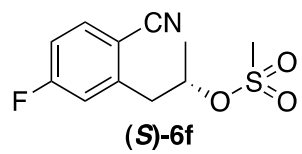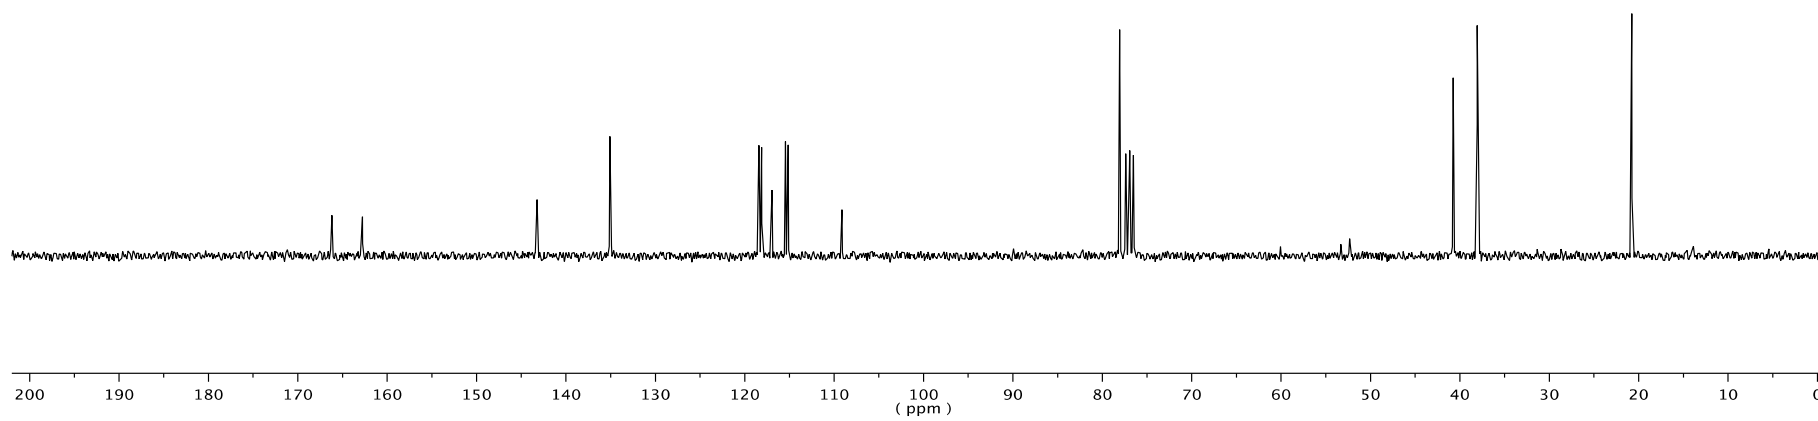

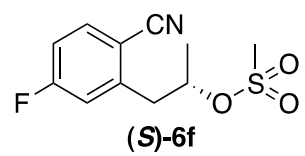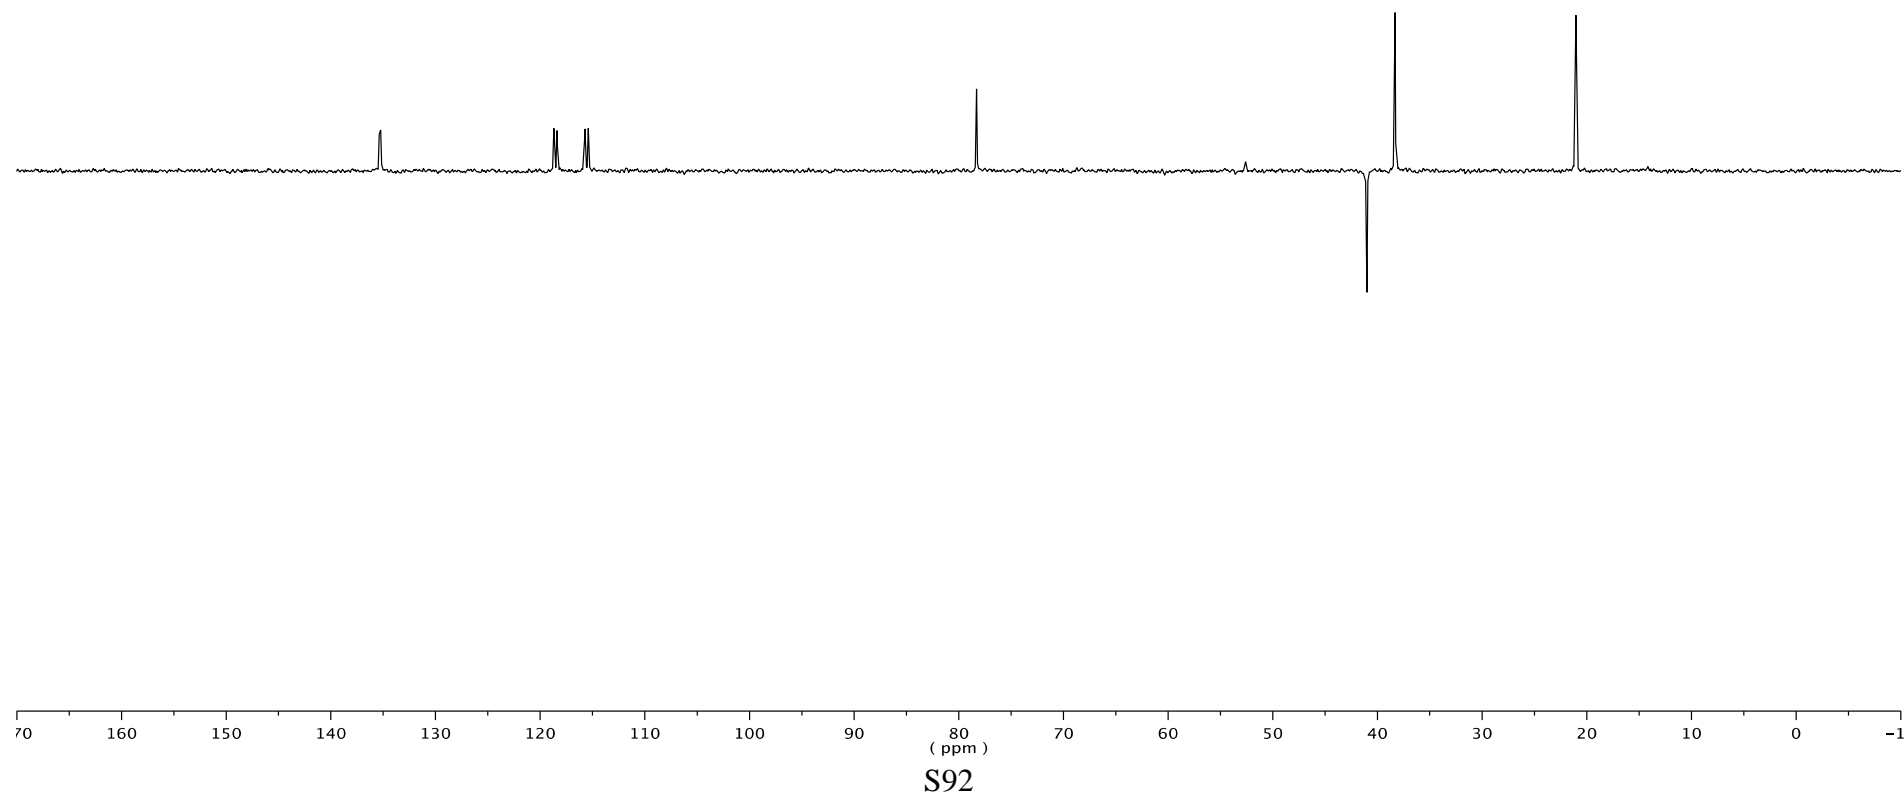

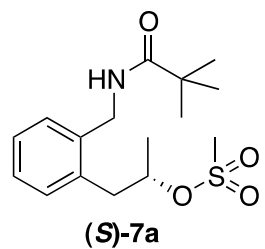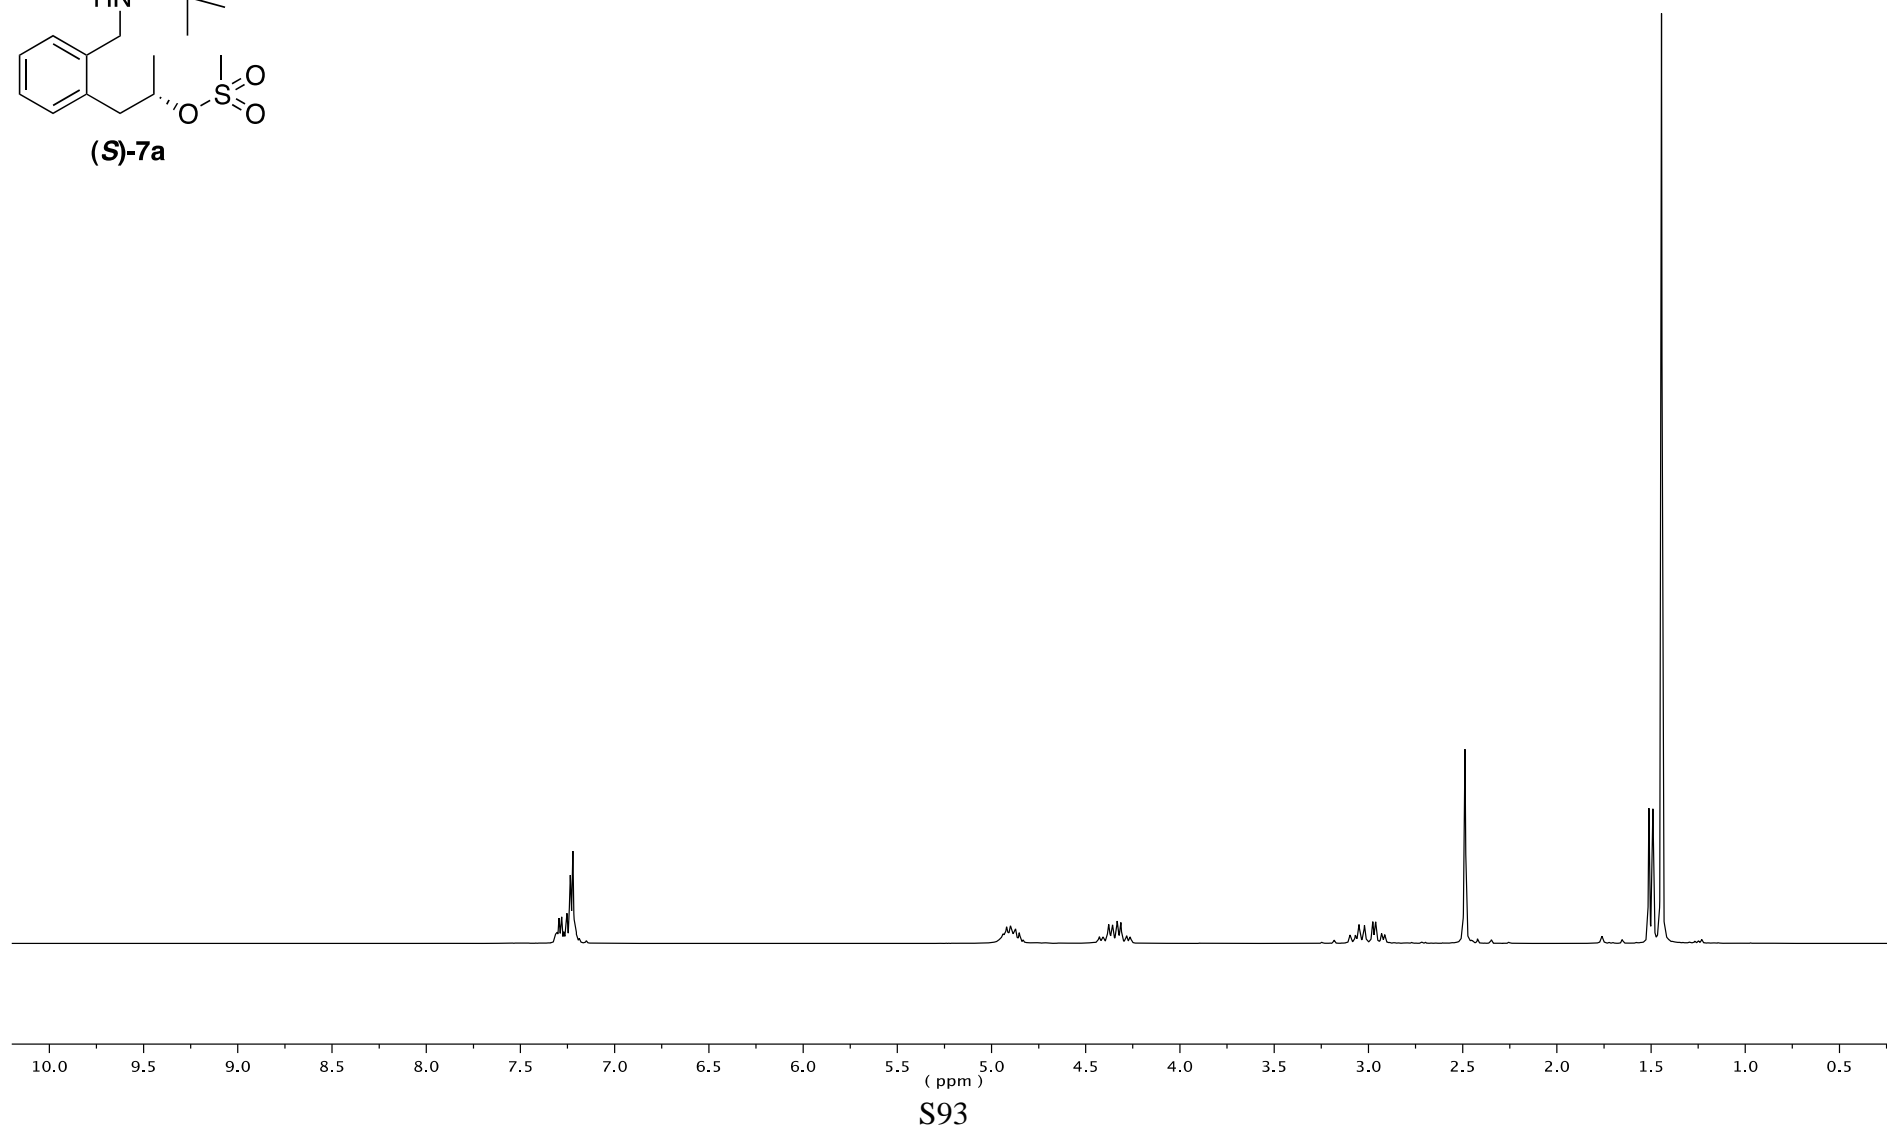

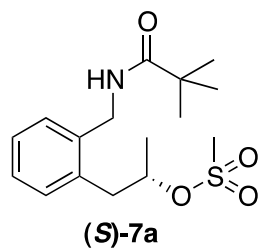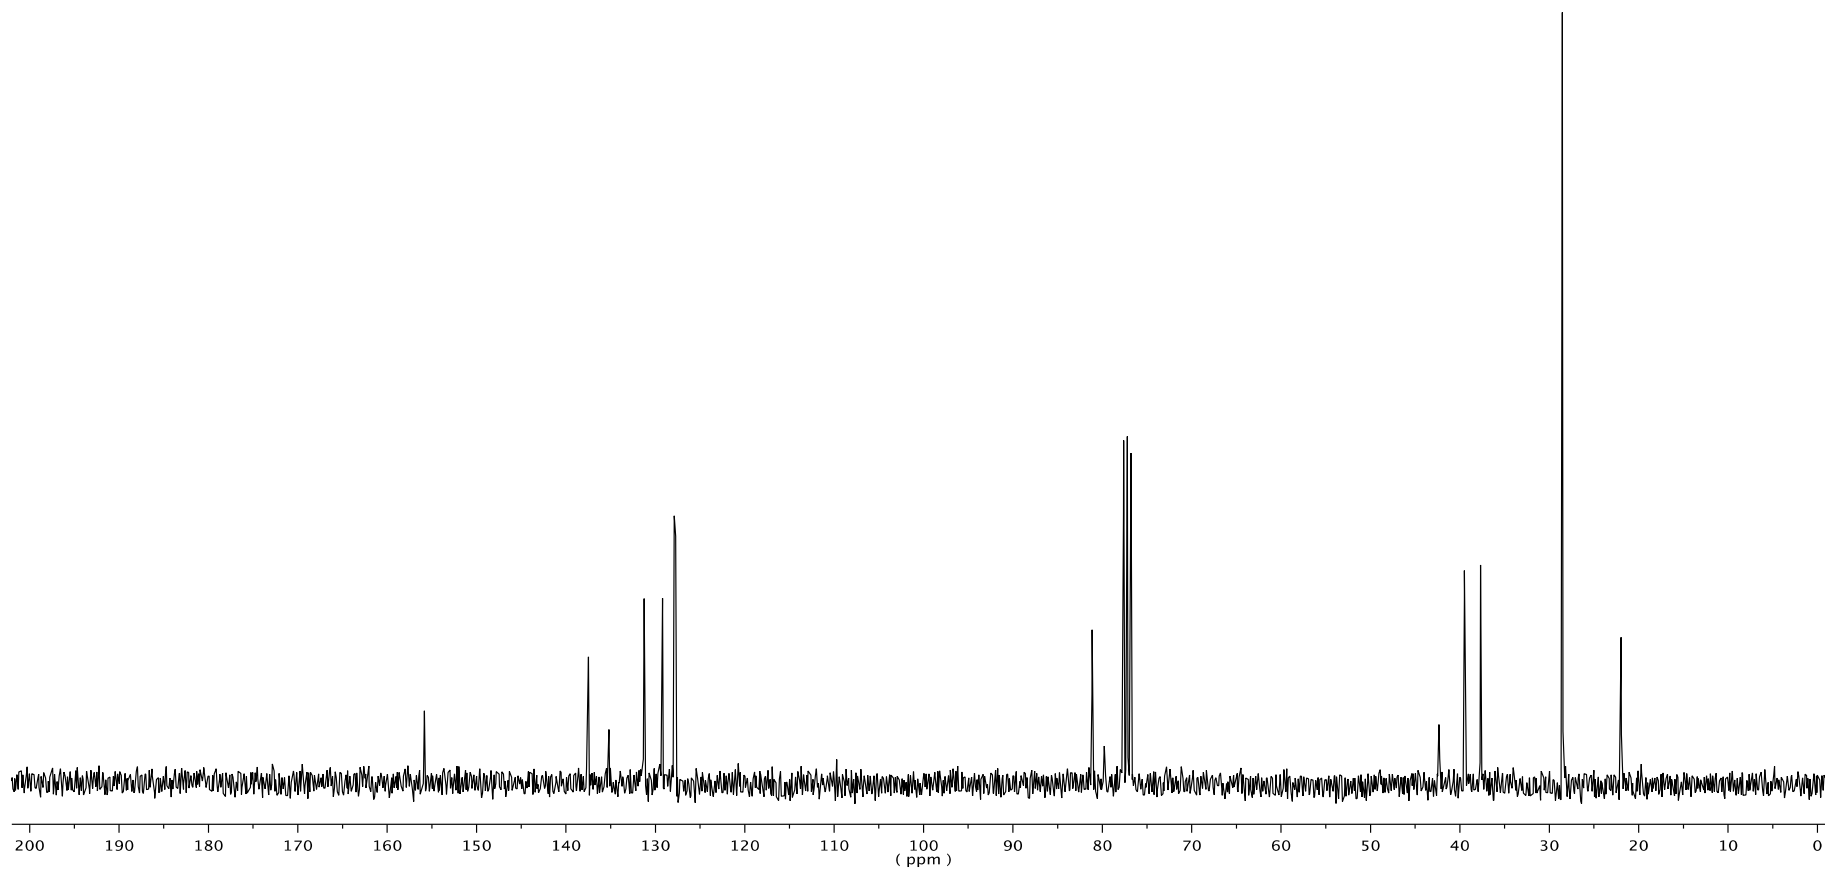

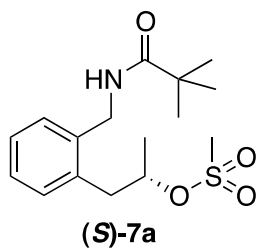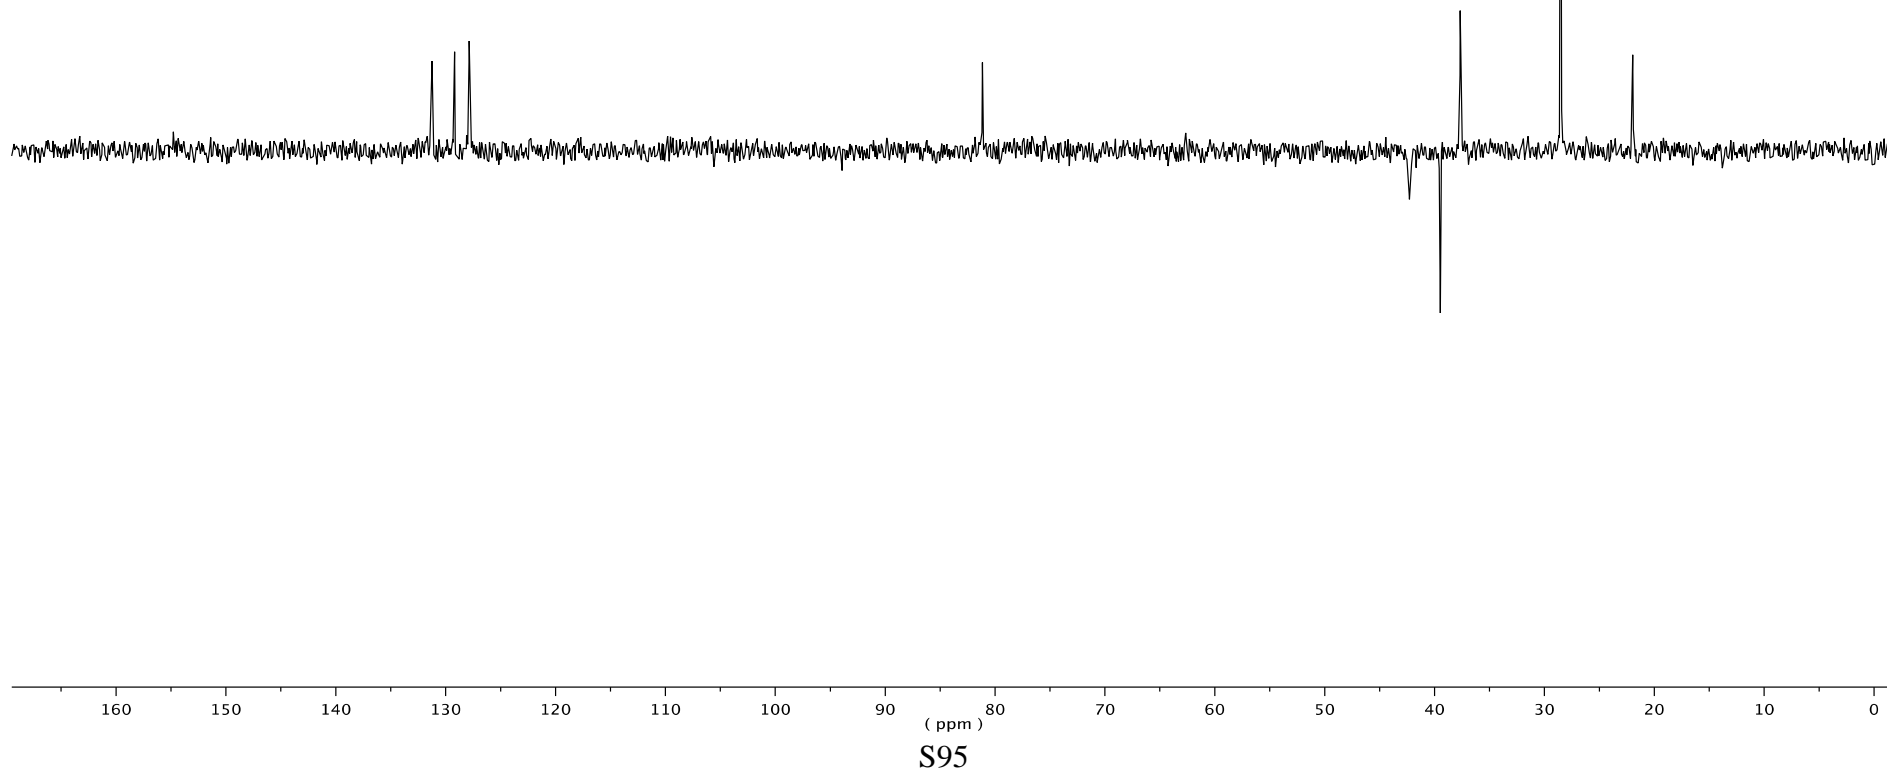

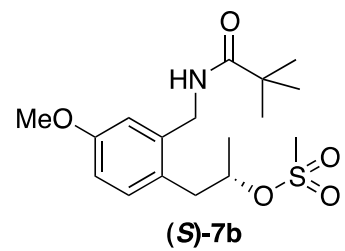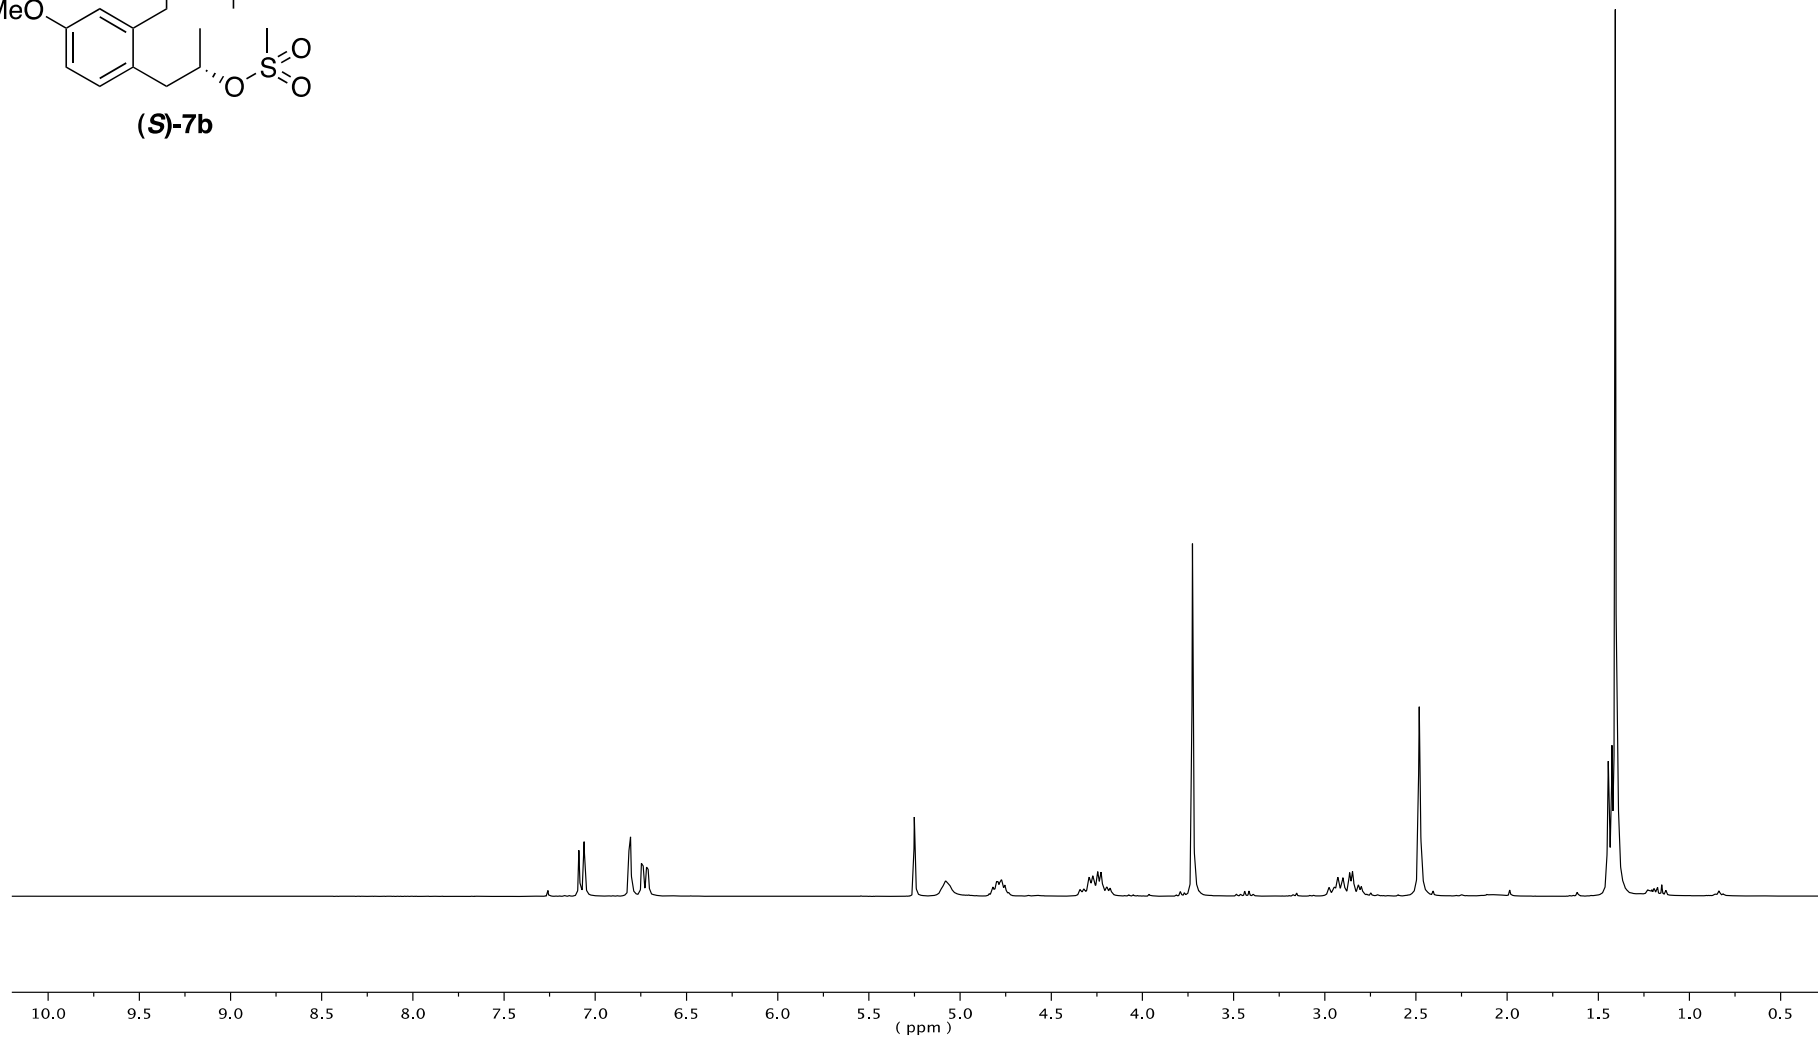



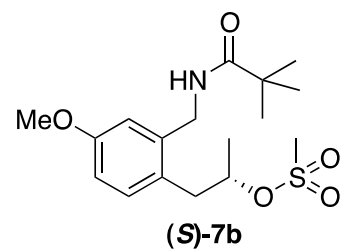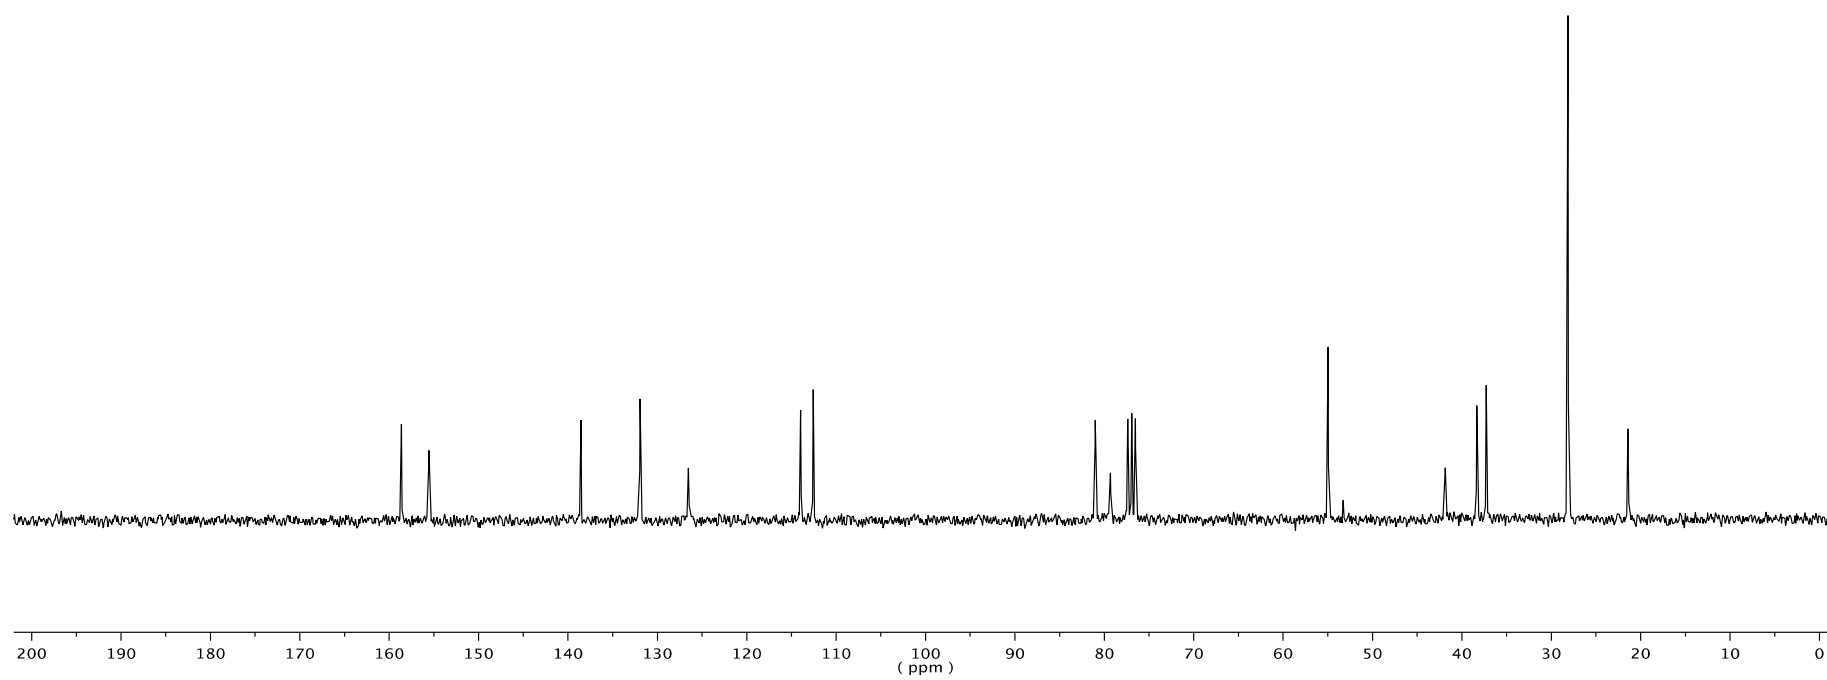

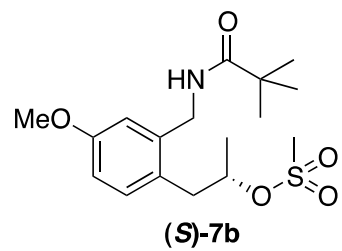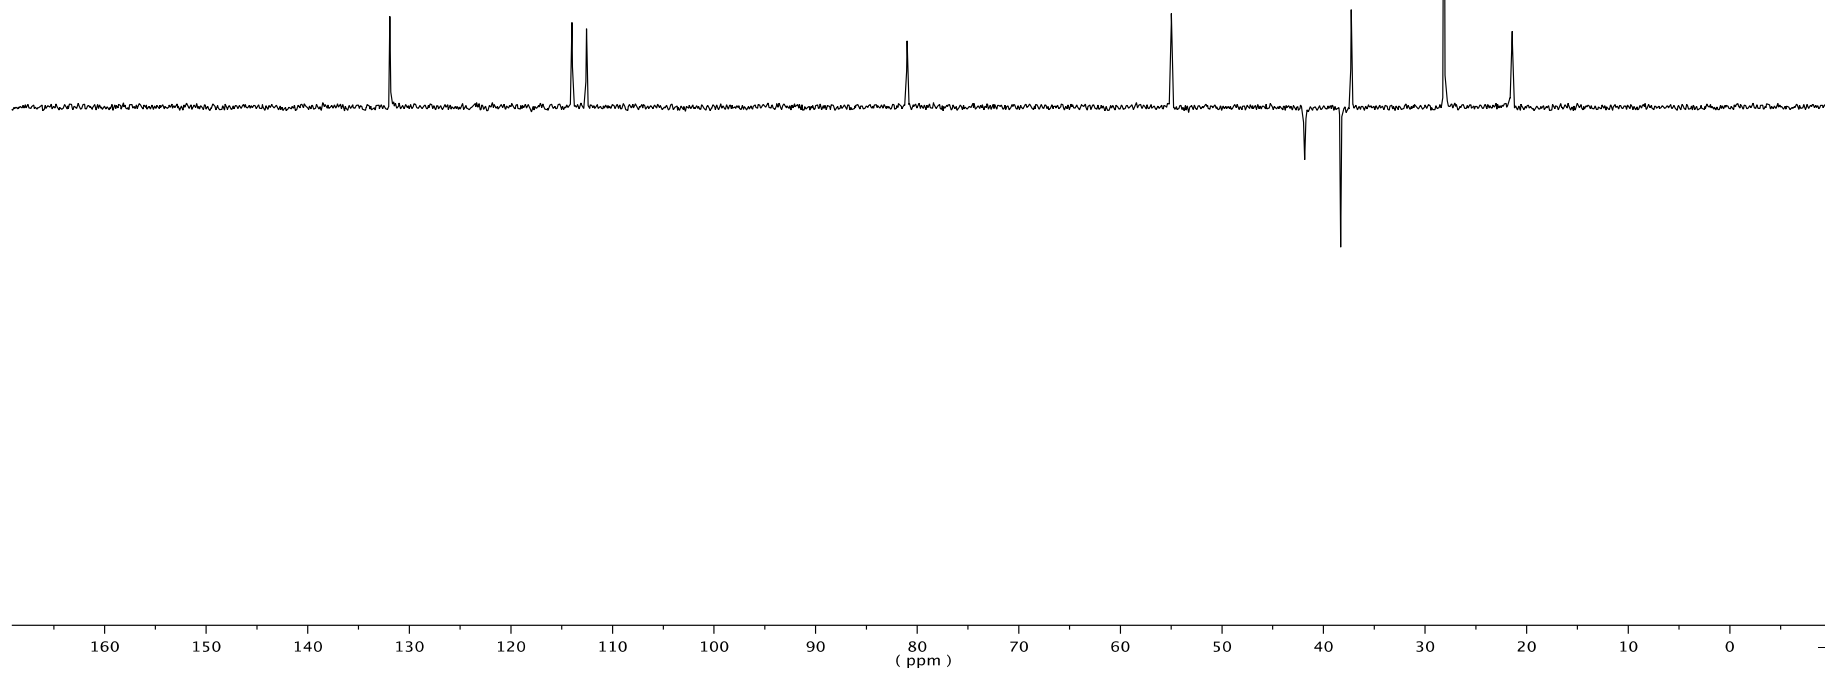

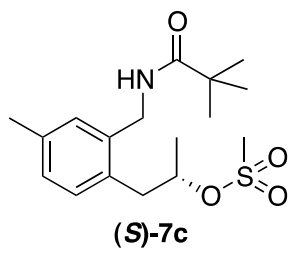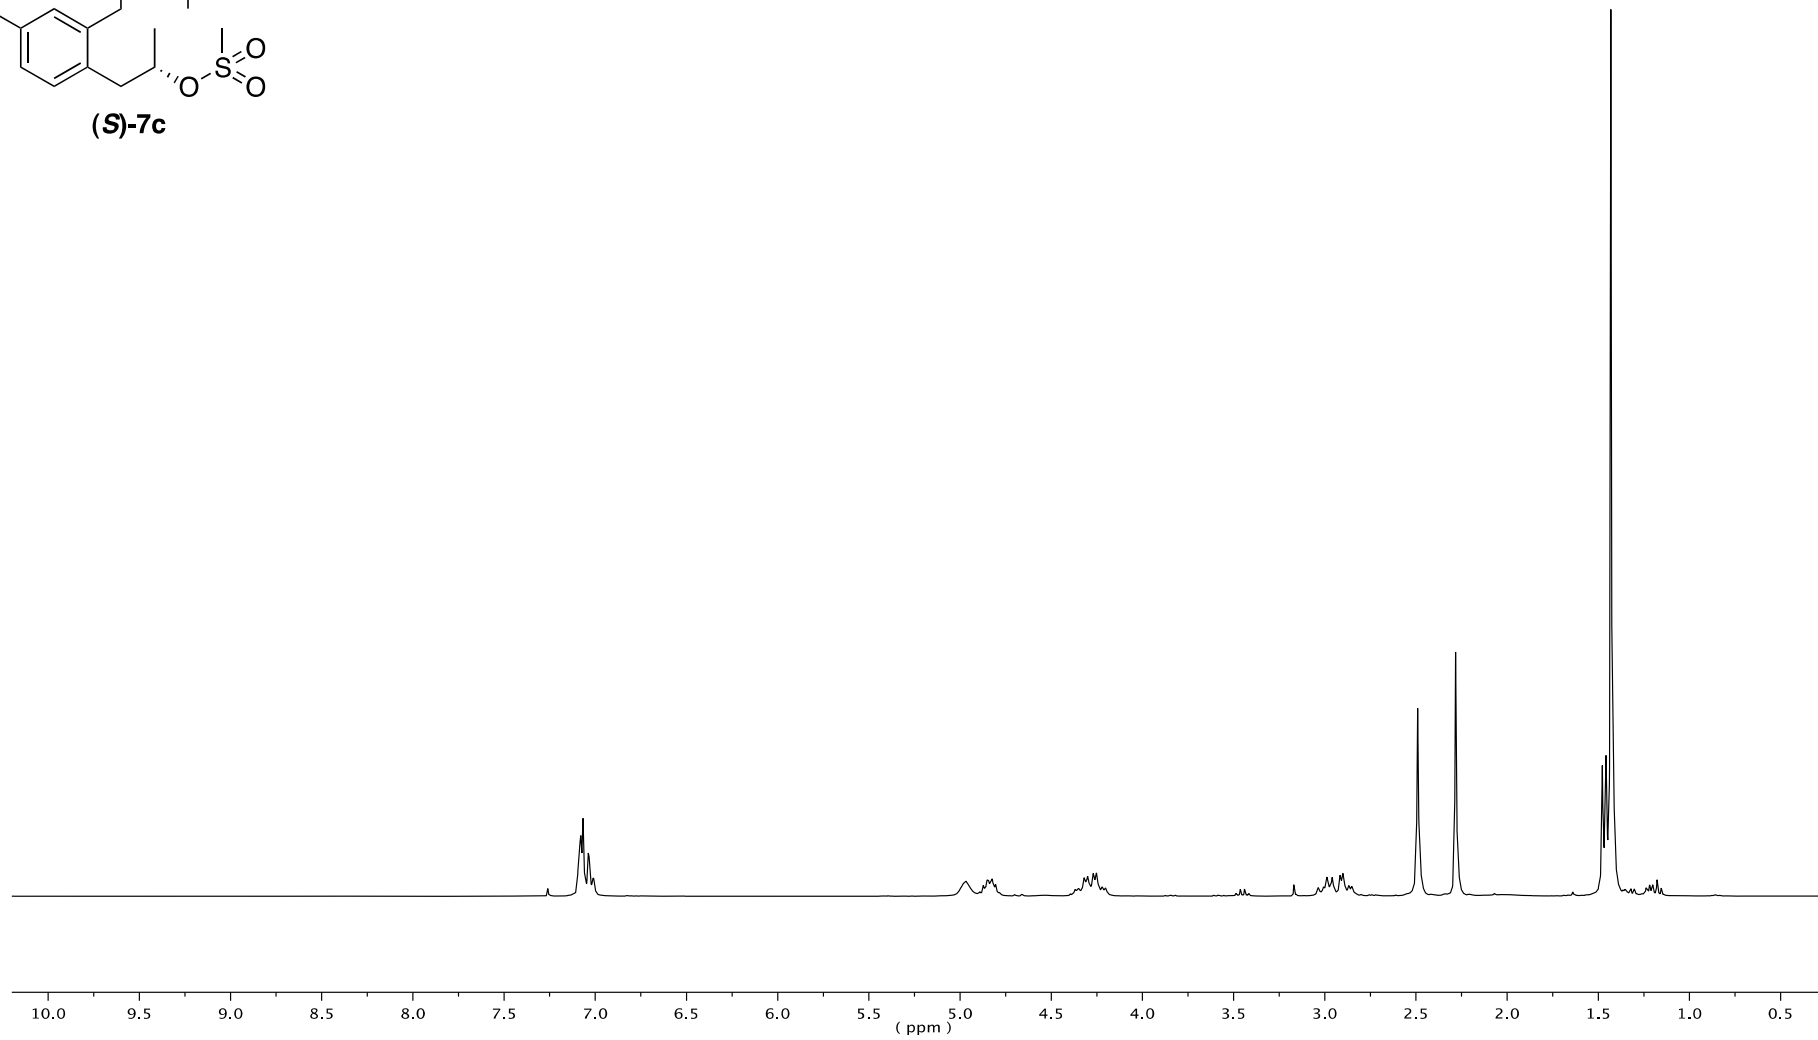

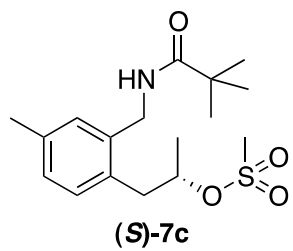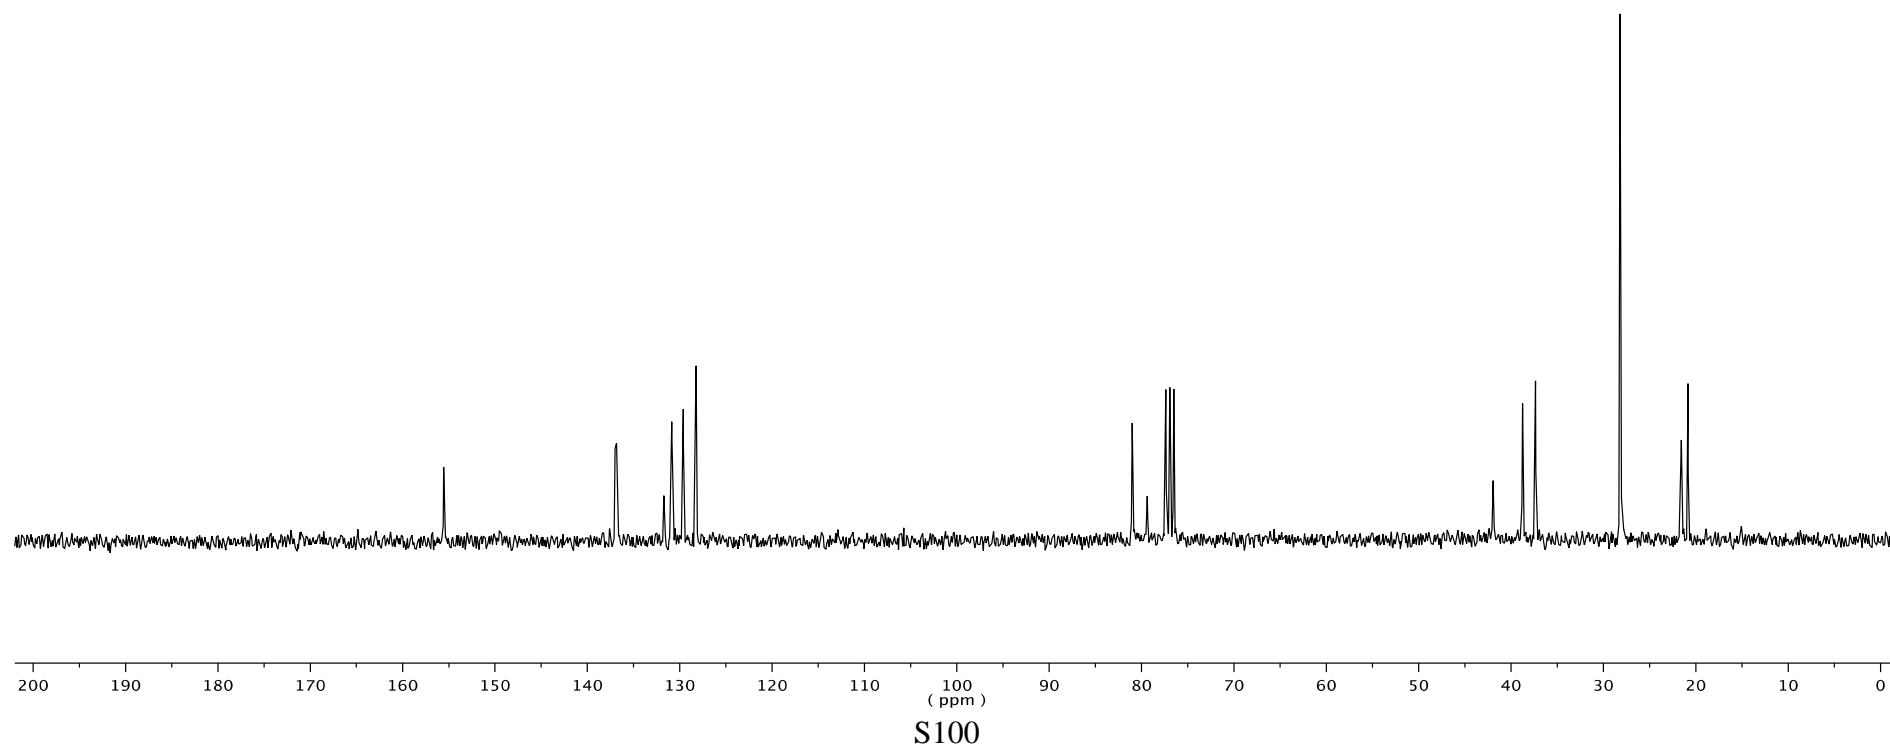

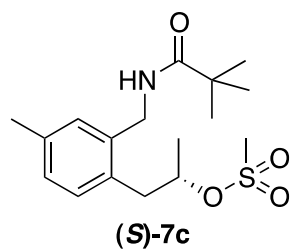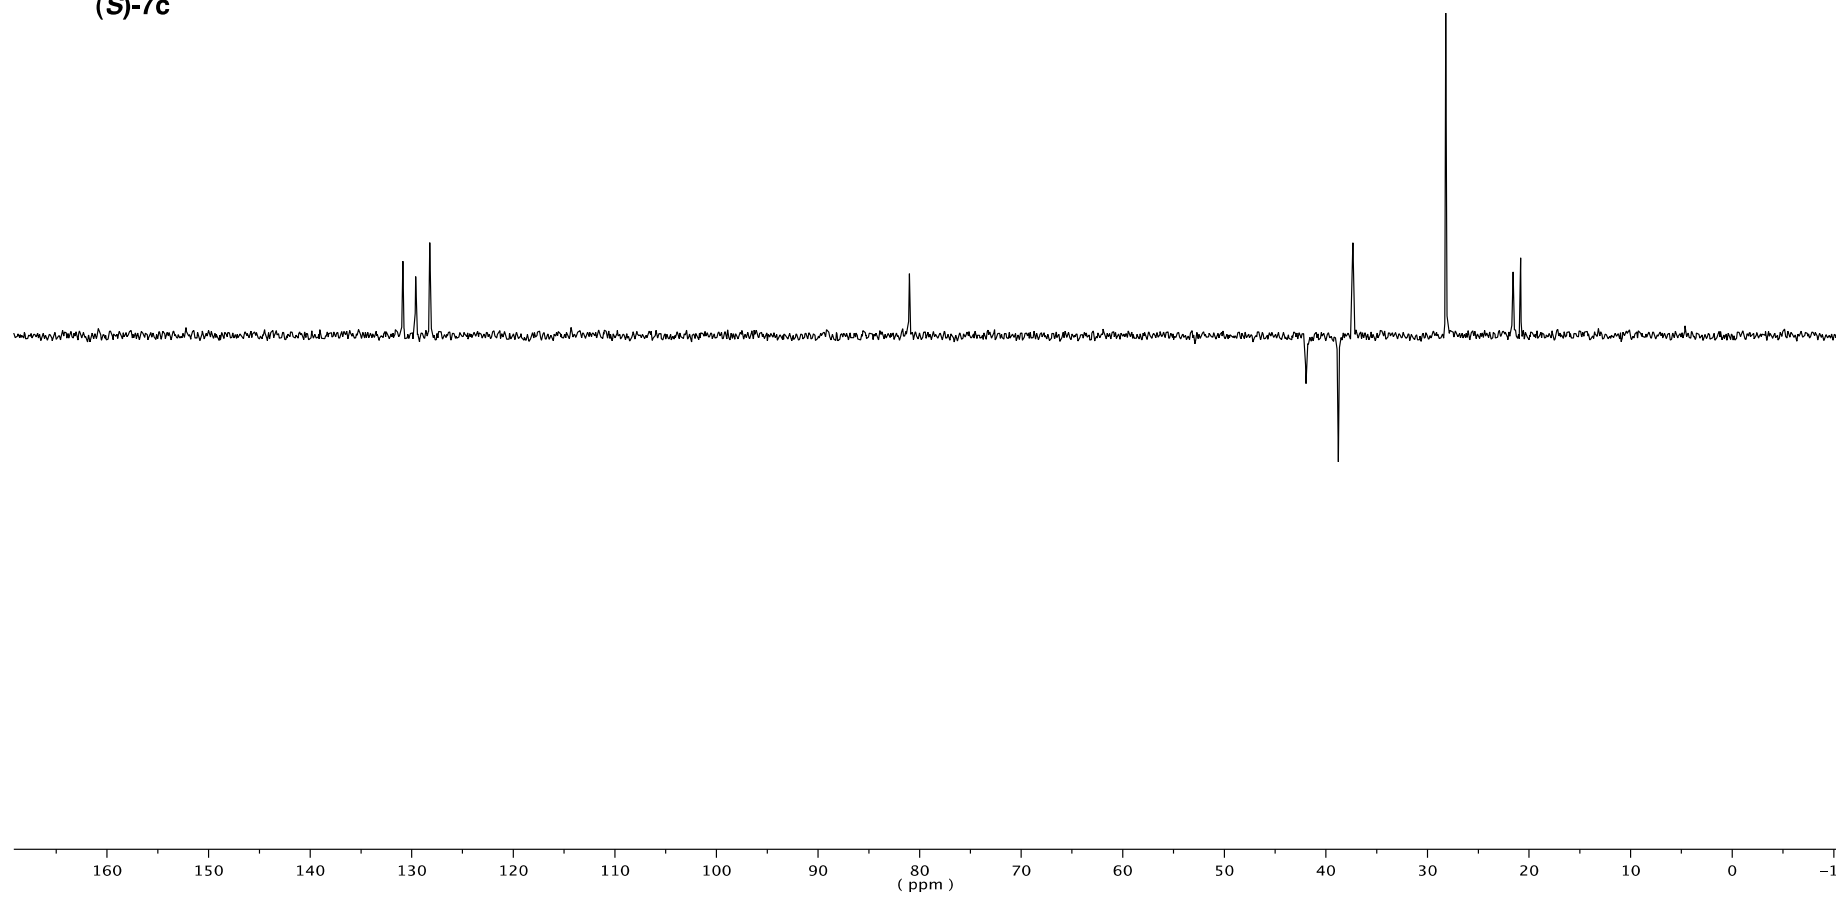

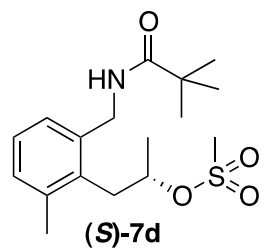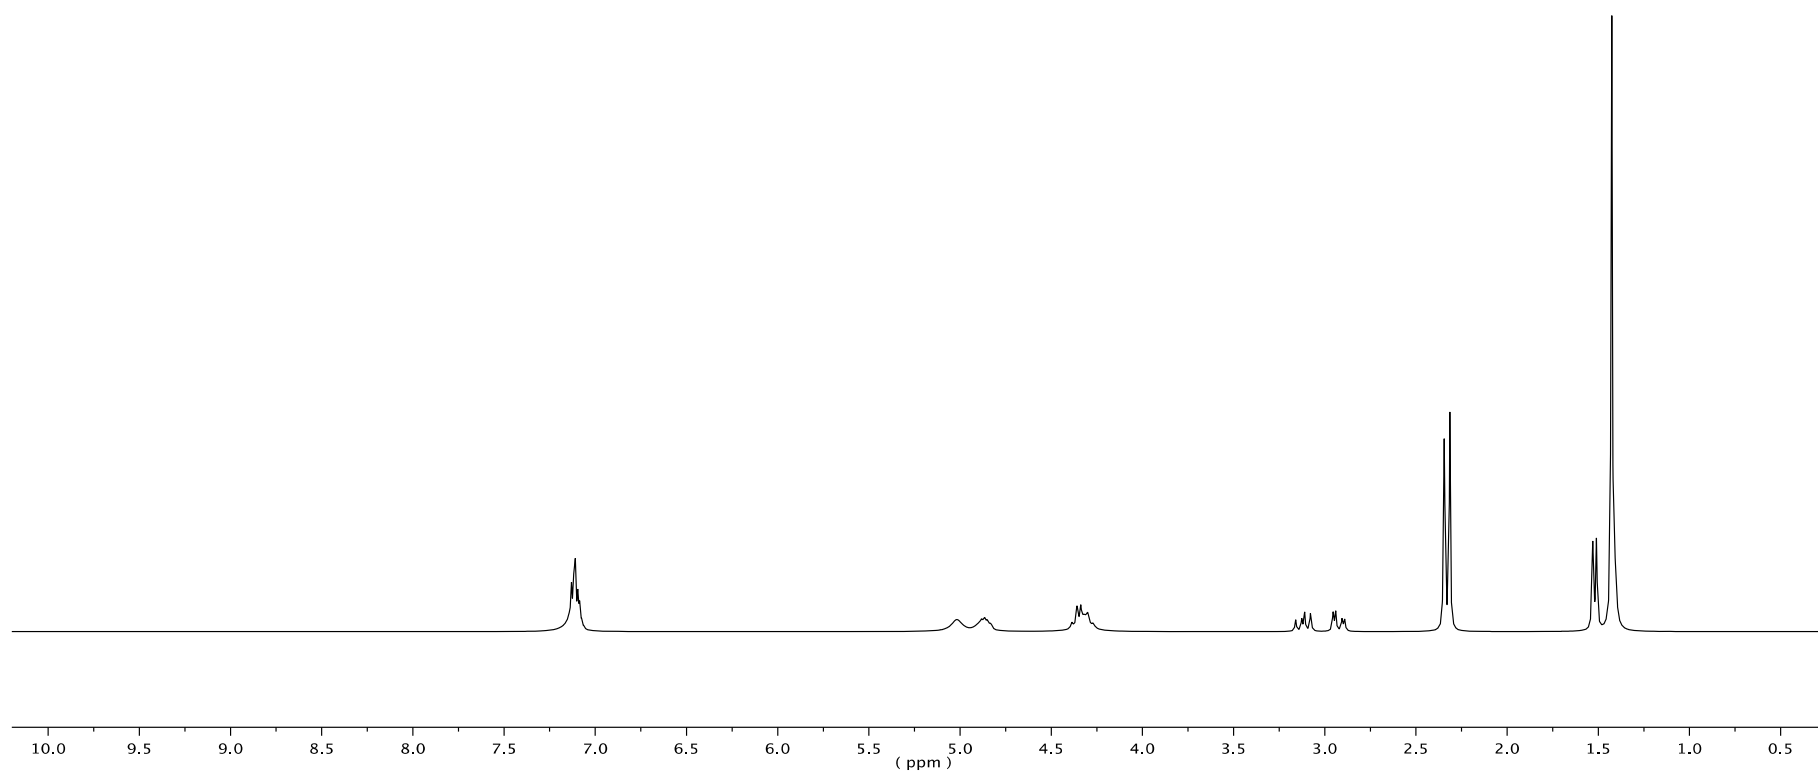

S102

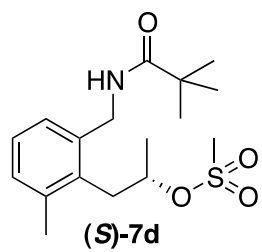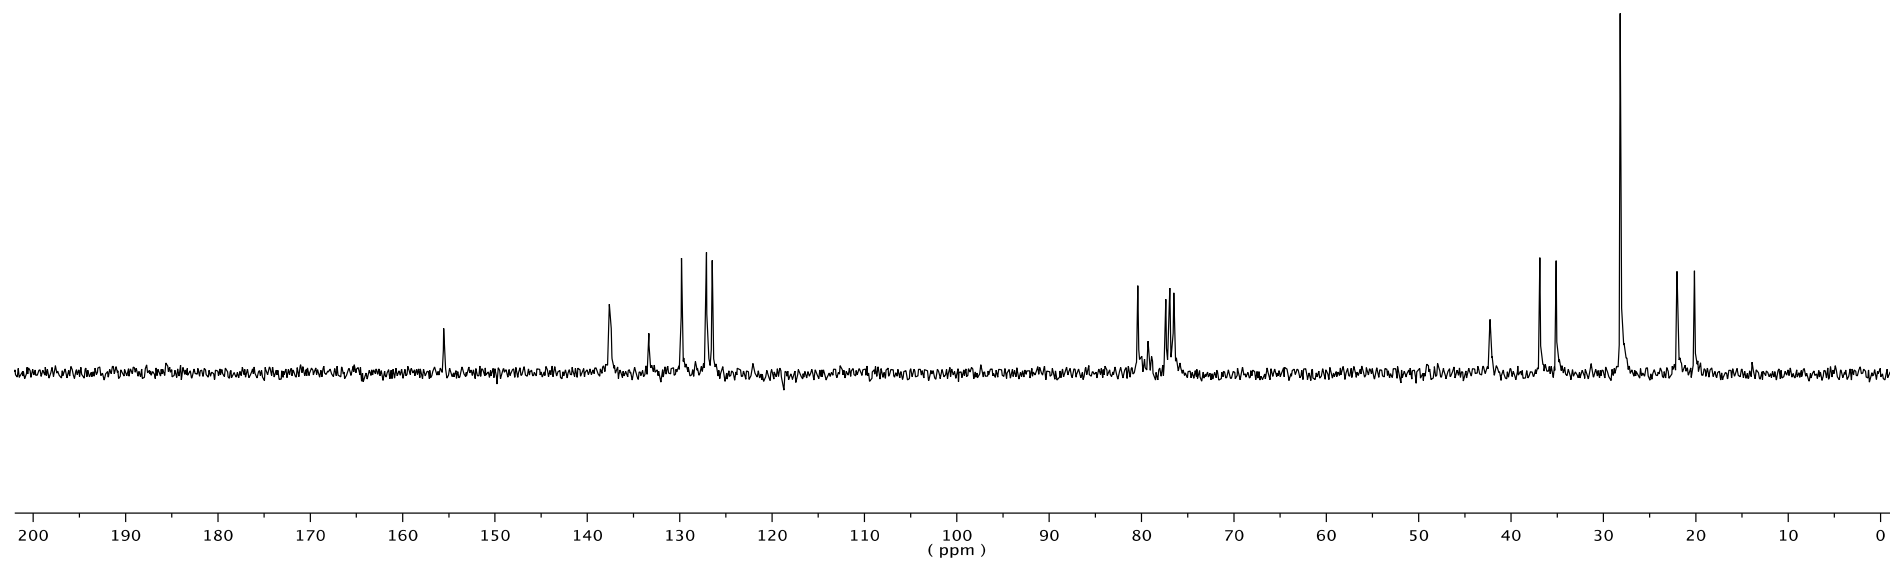

S103

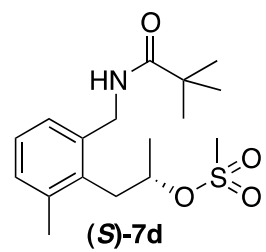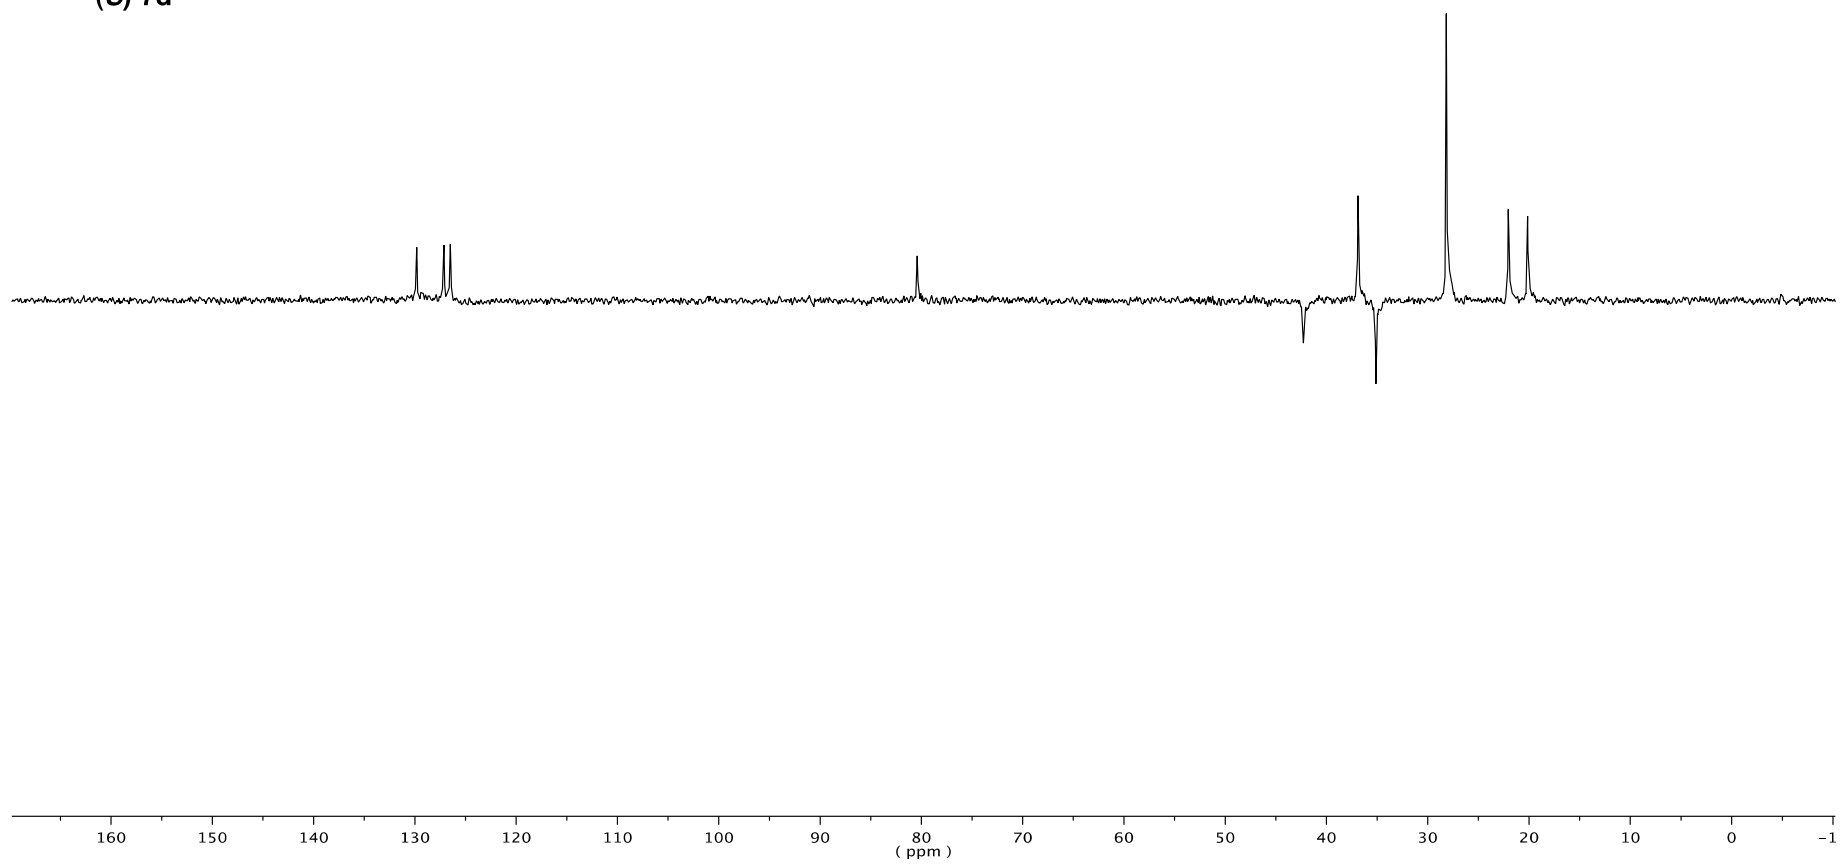



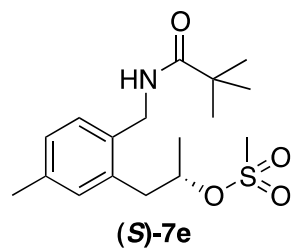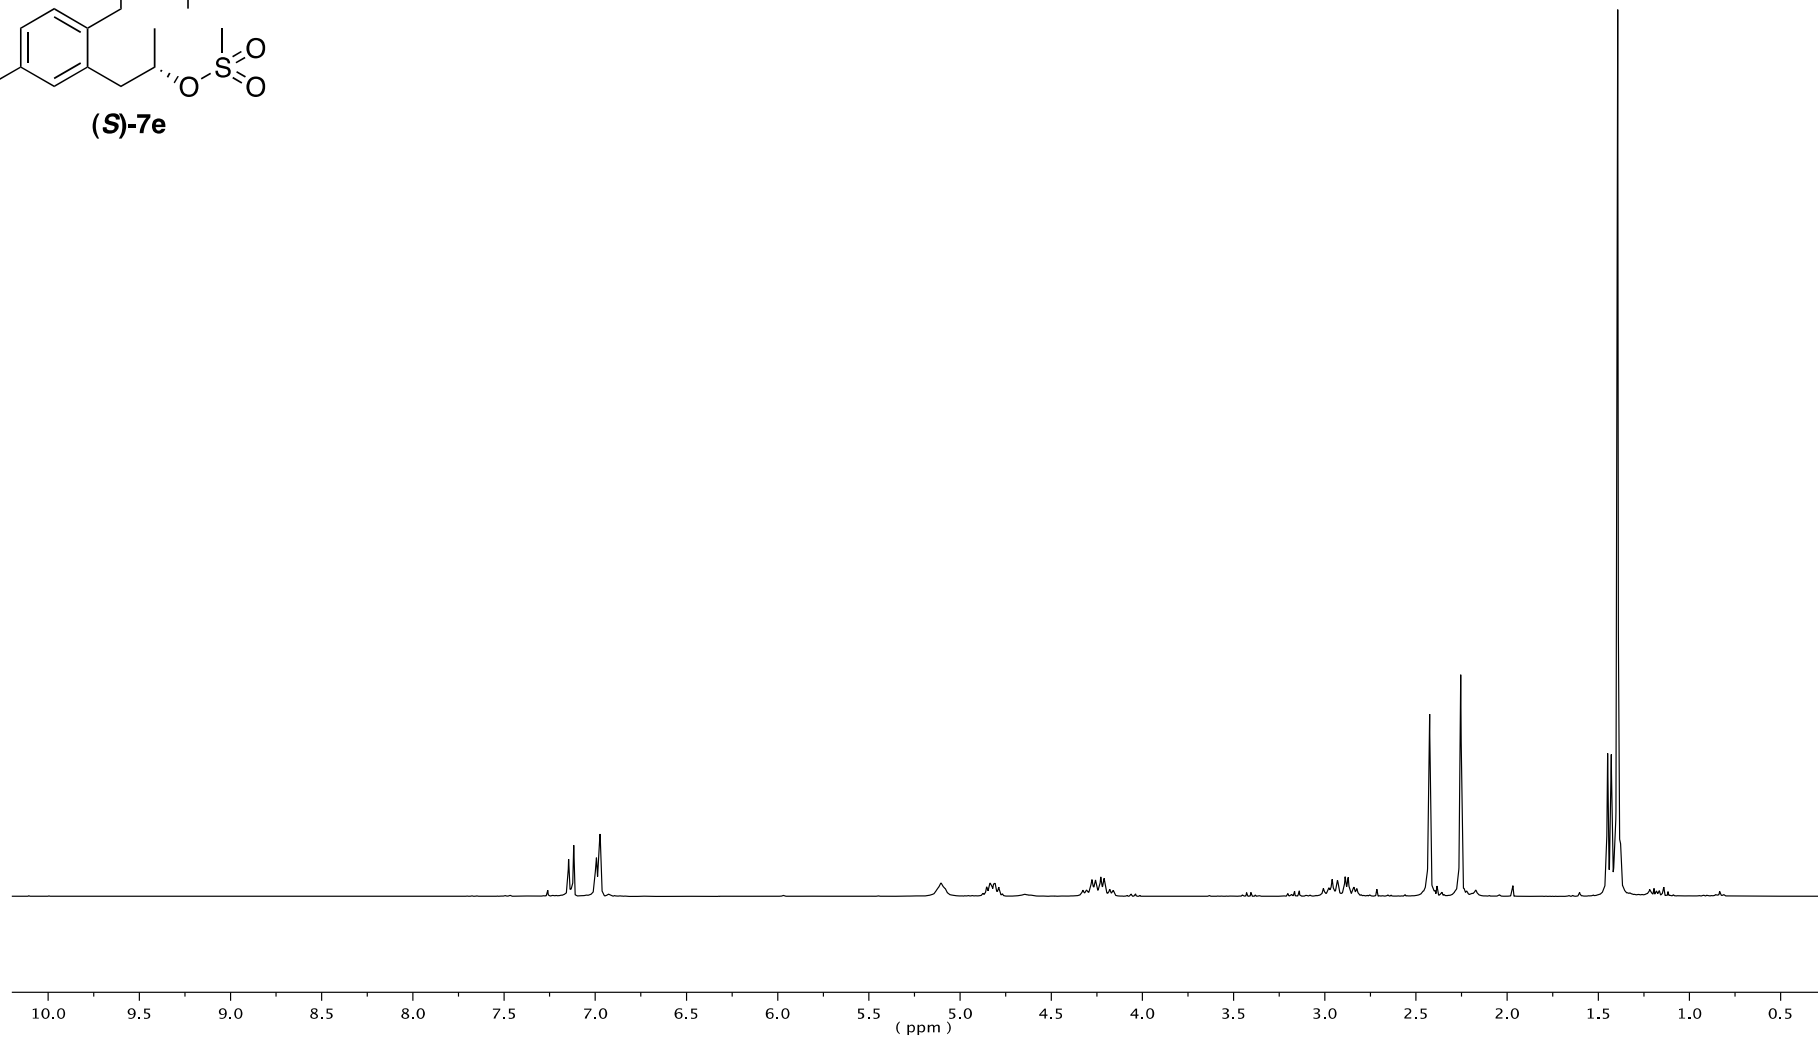

S105

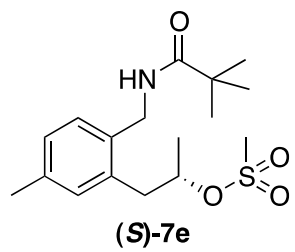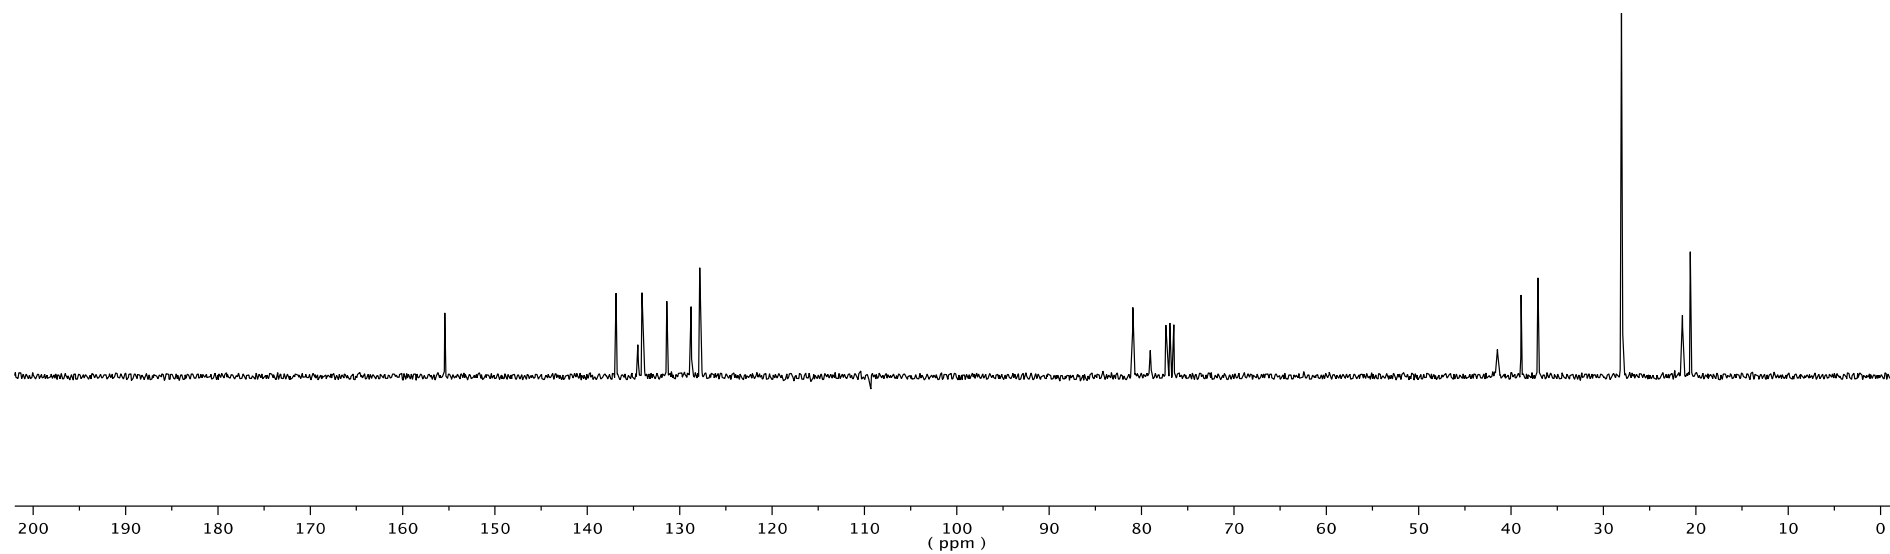

S106

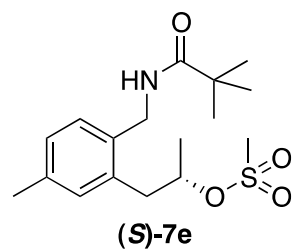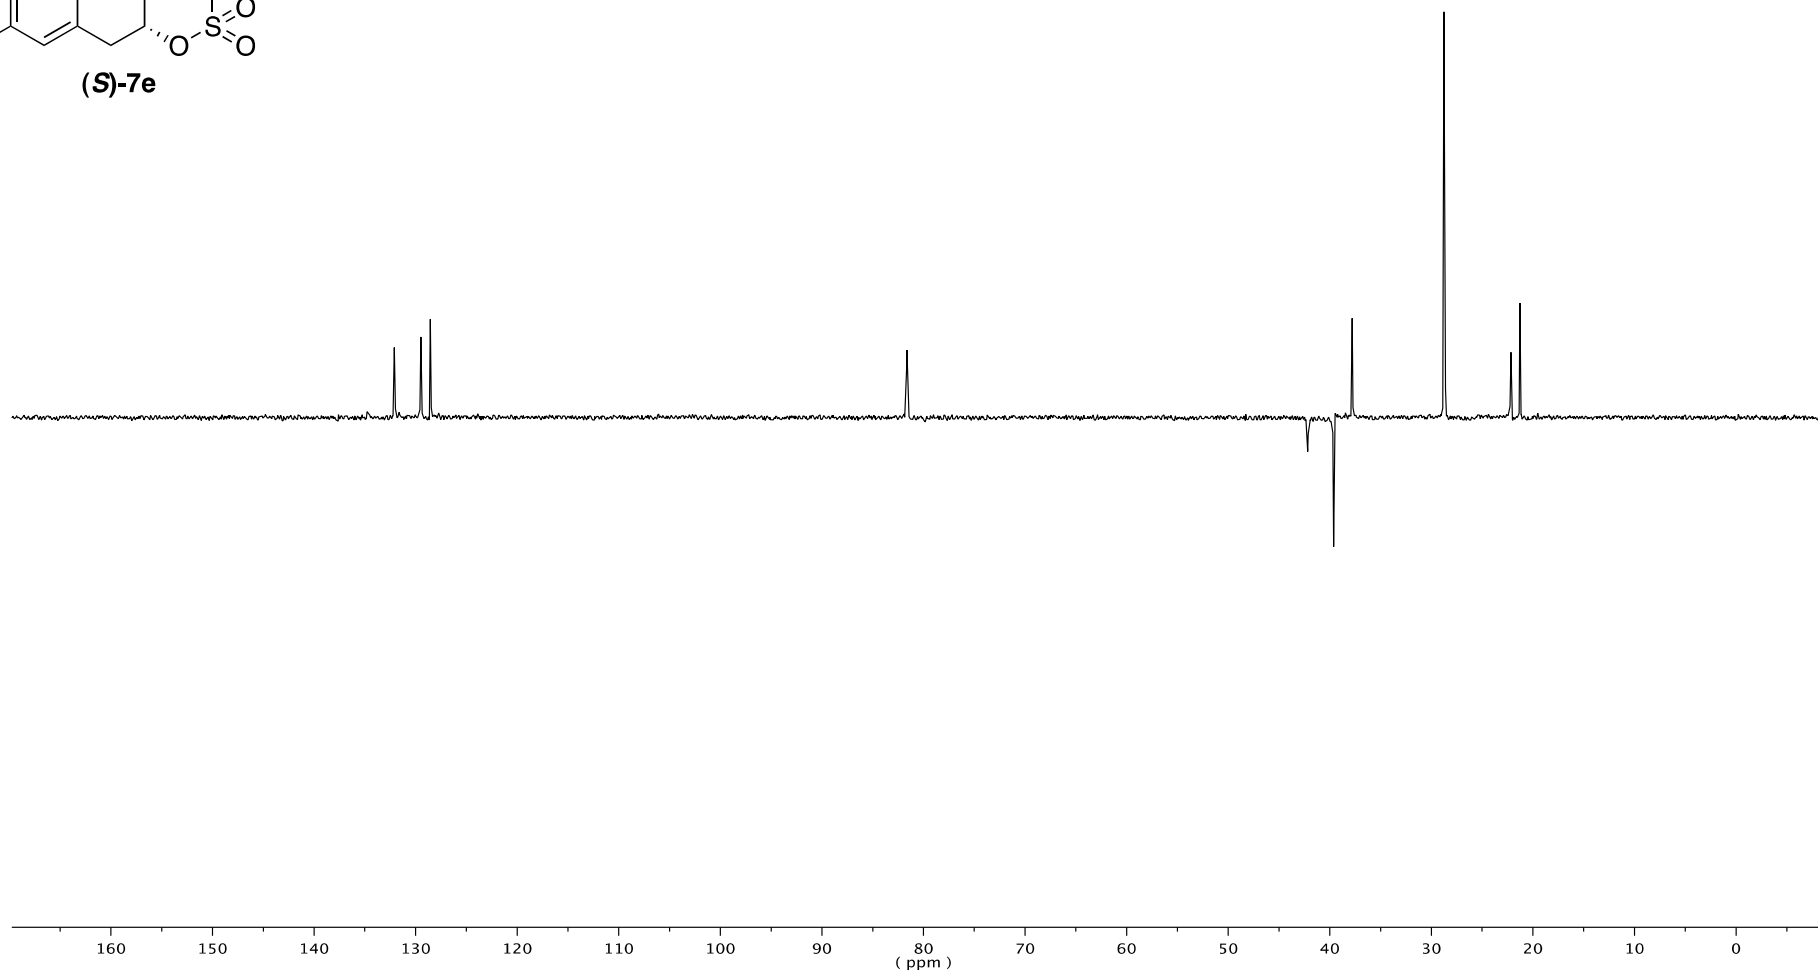

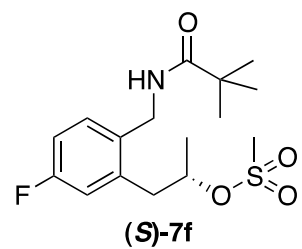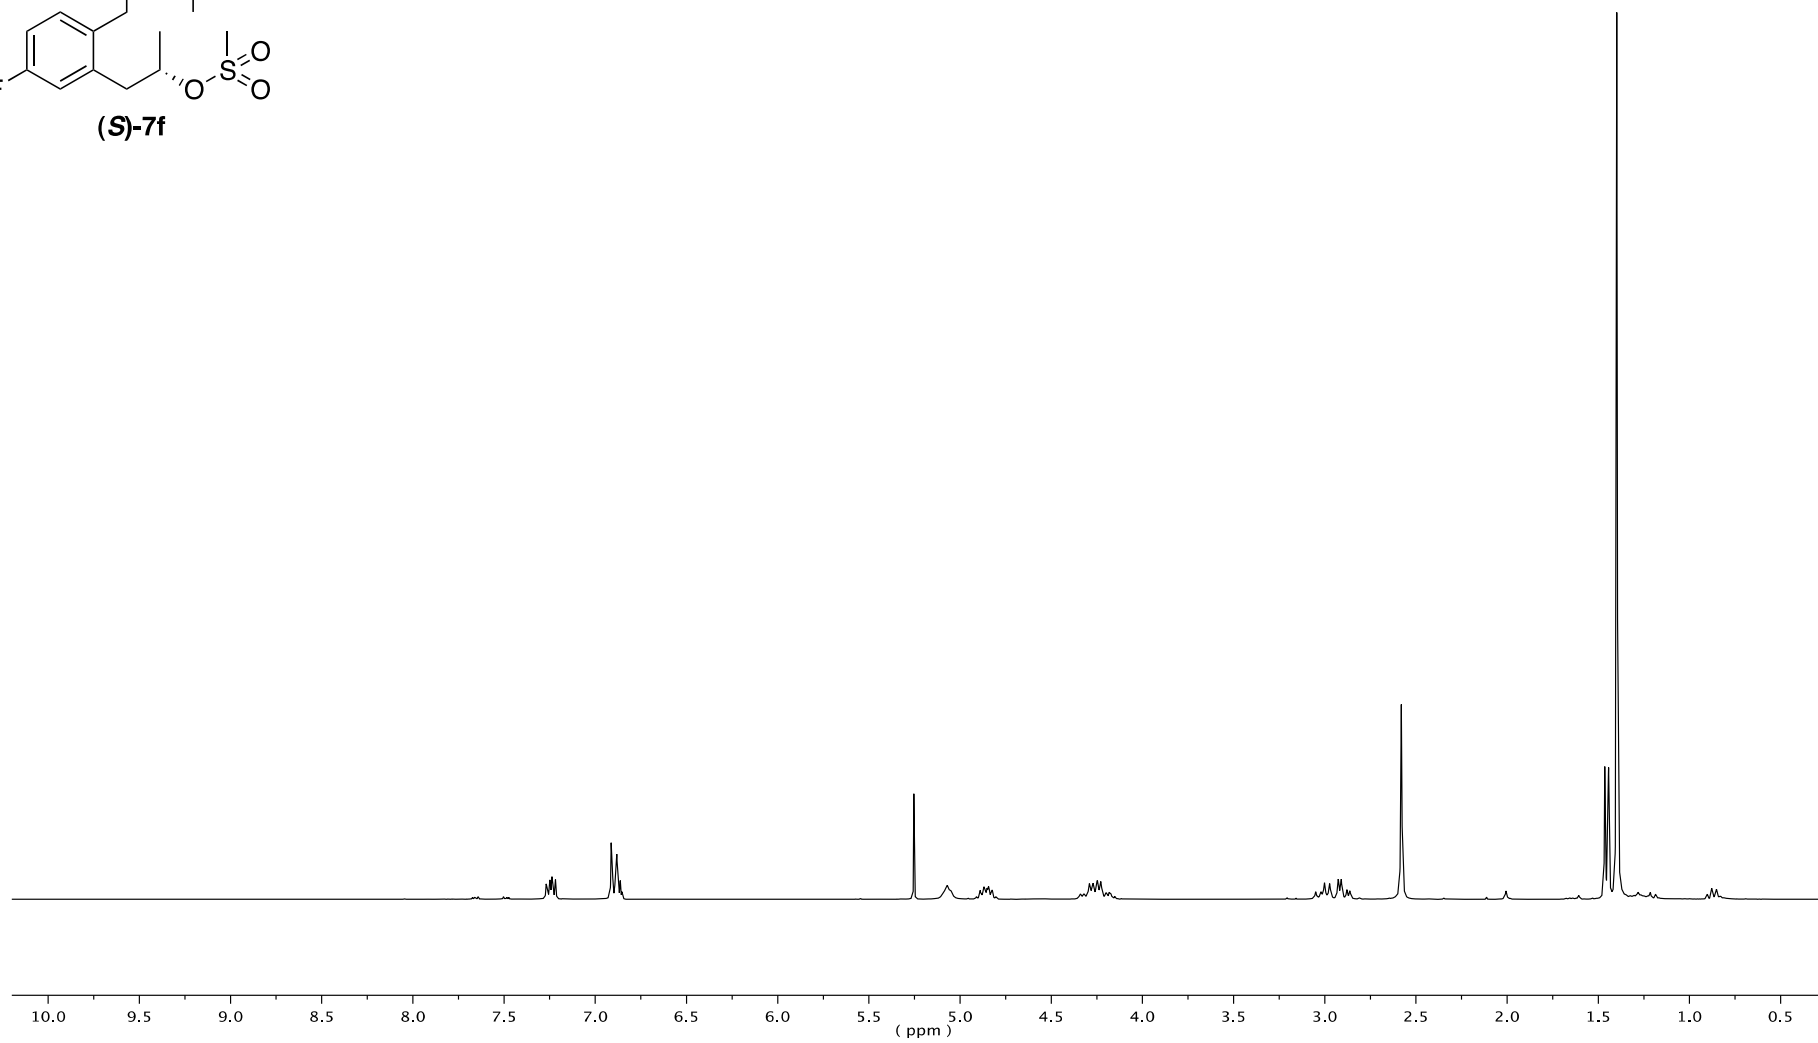

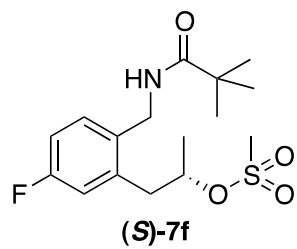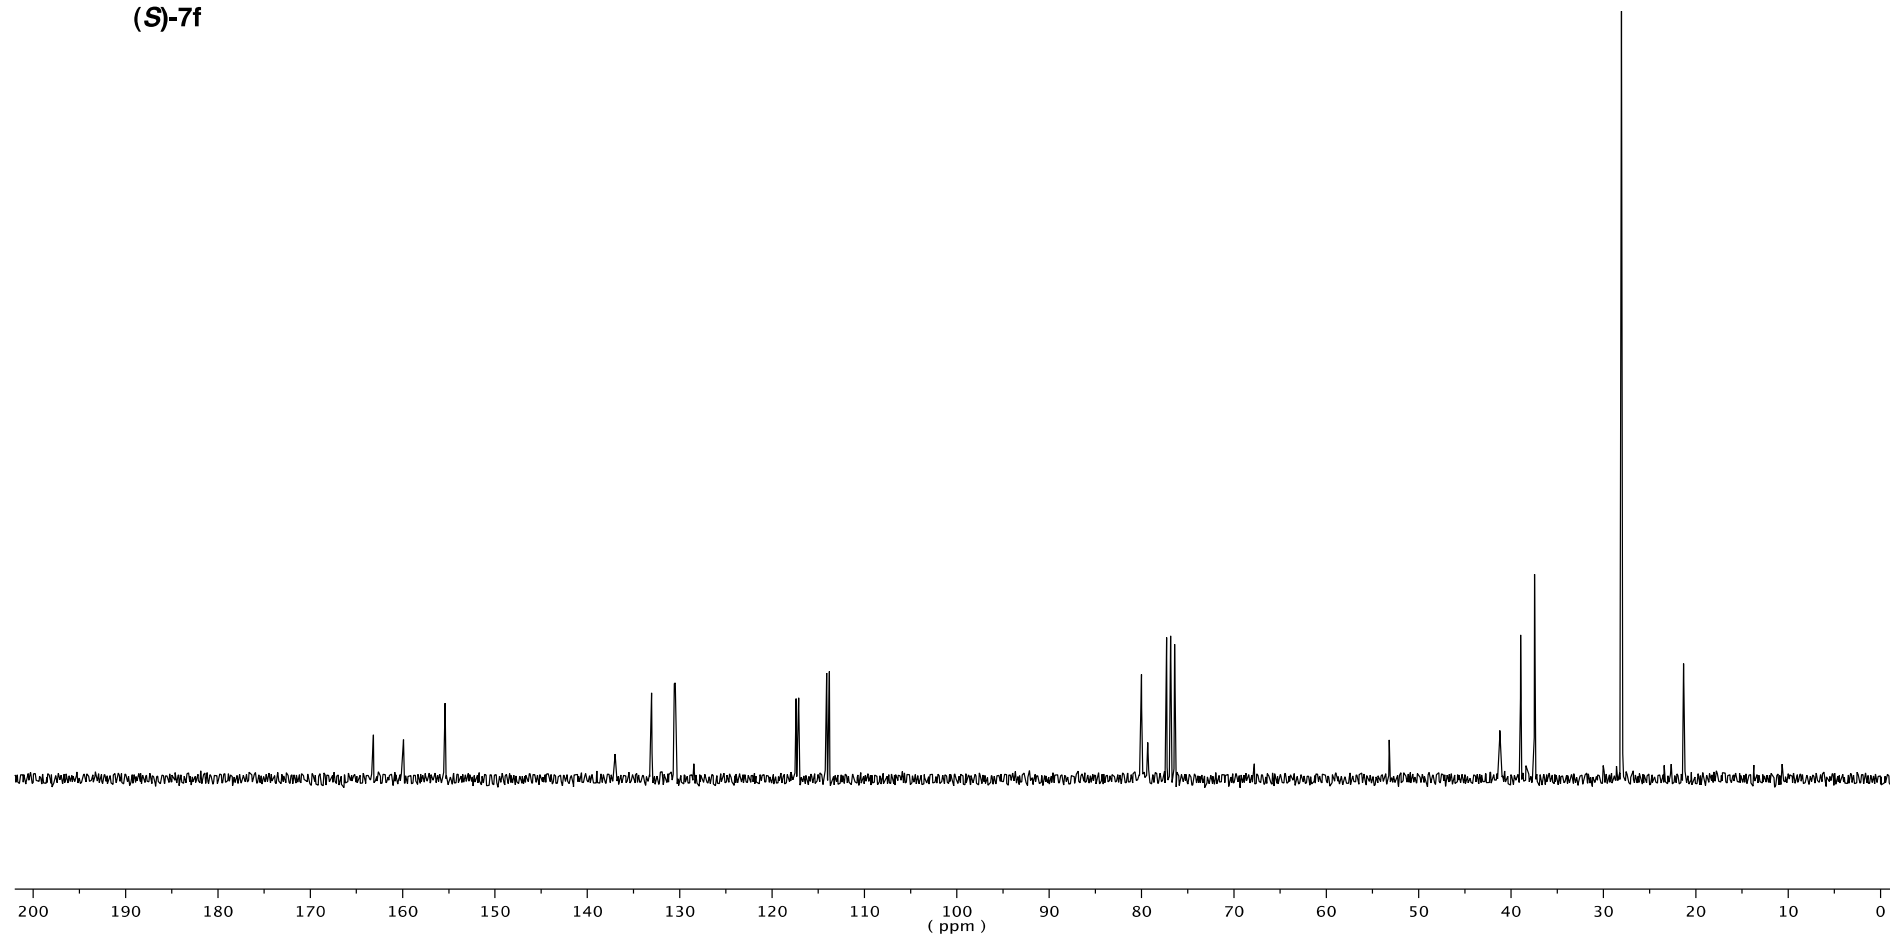

S109

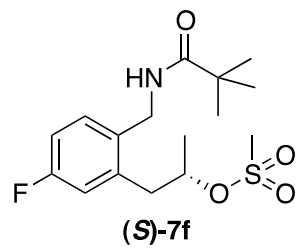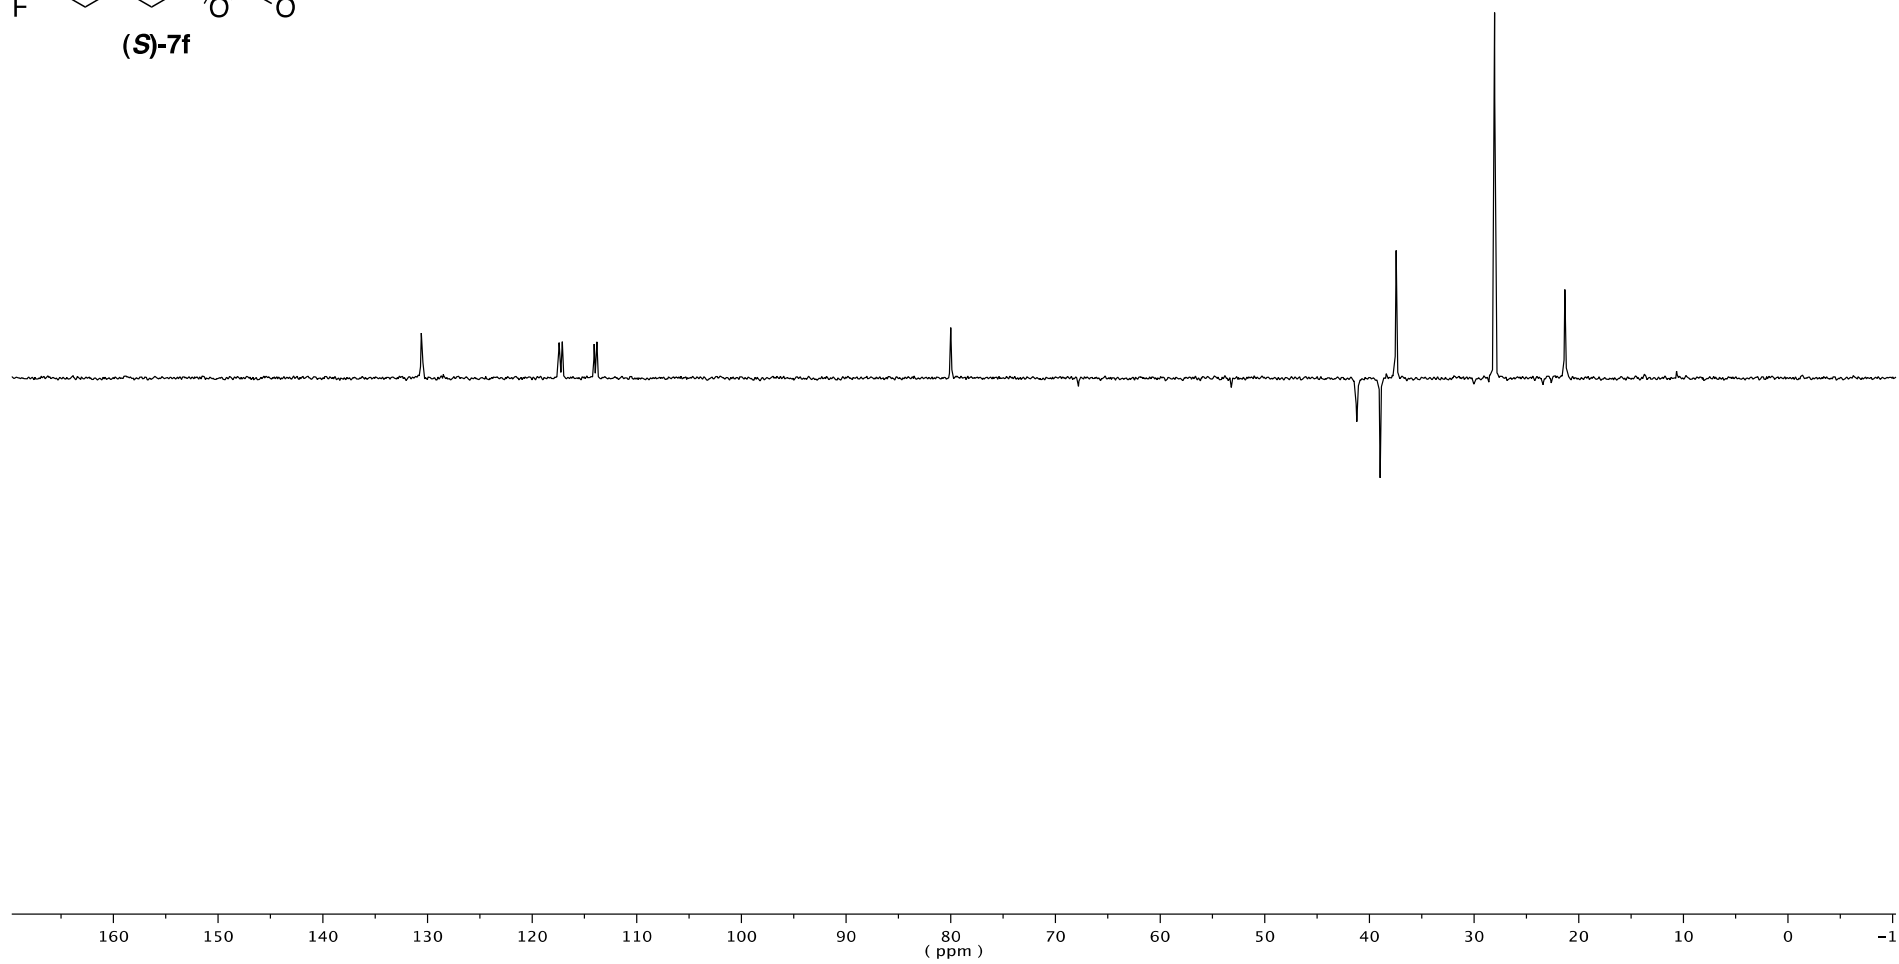

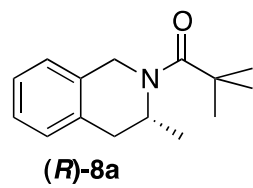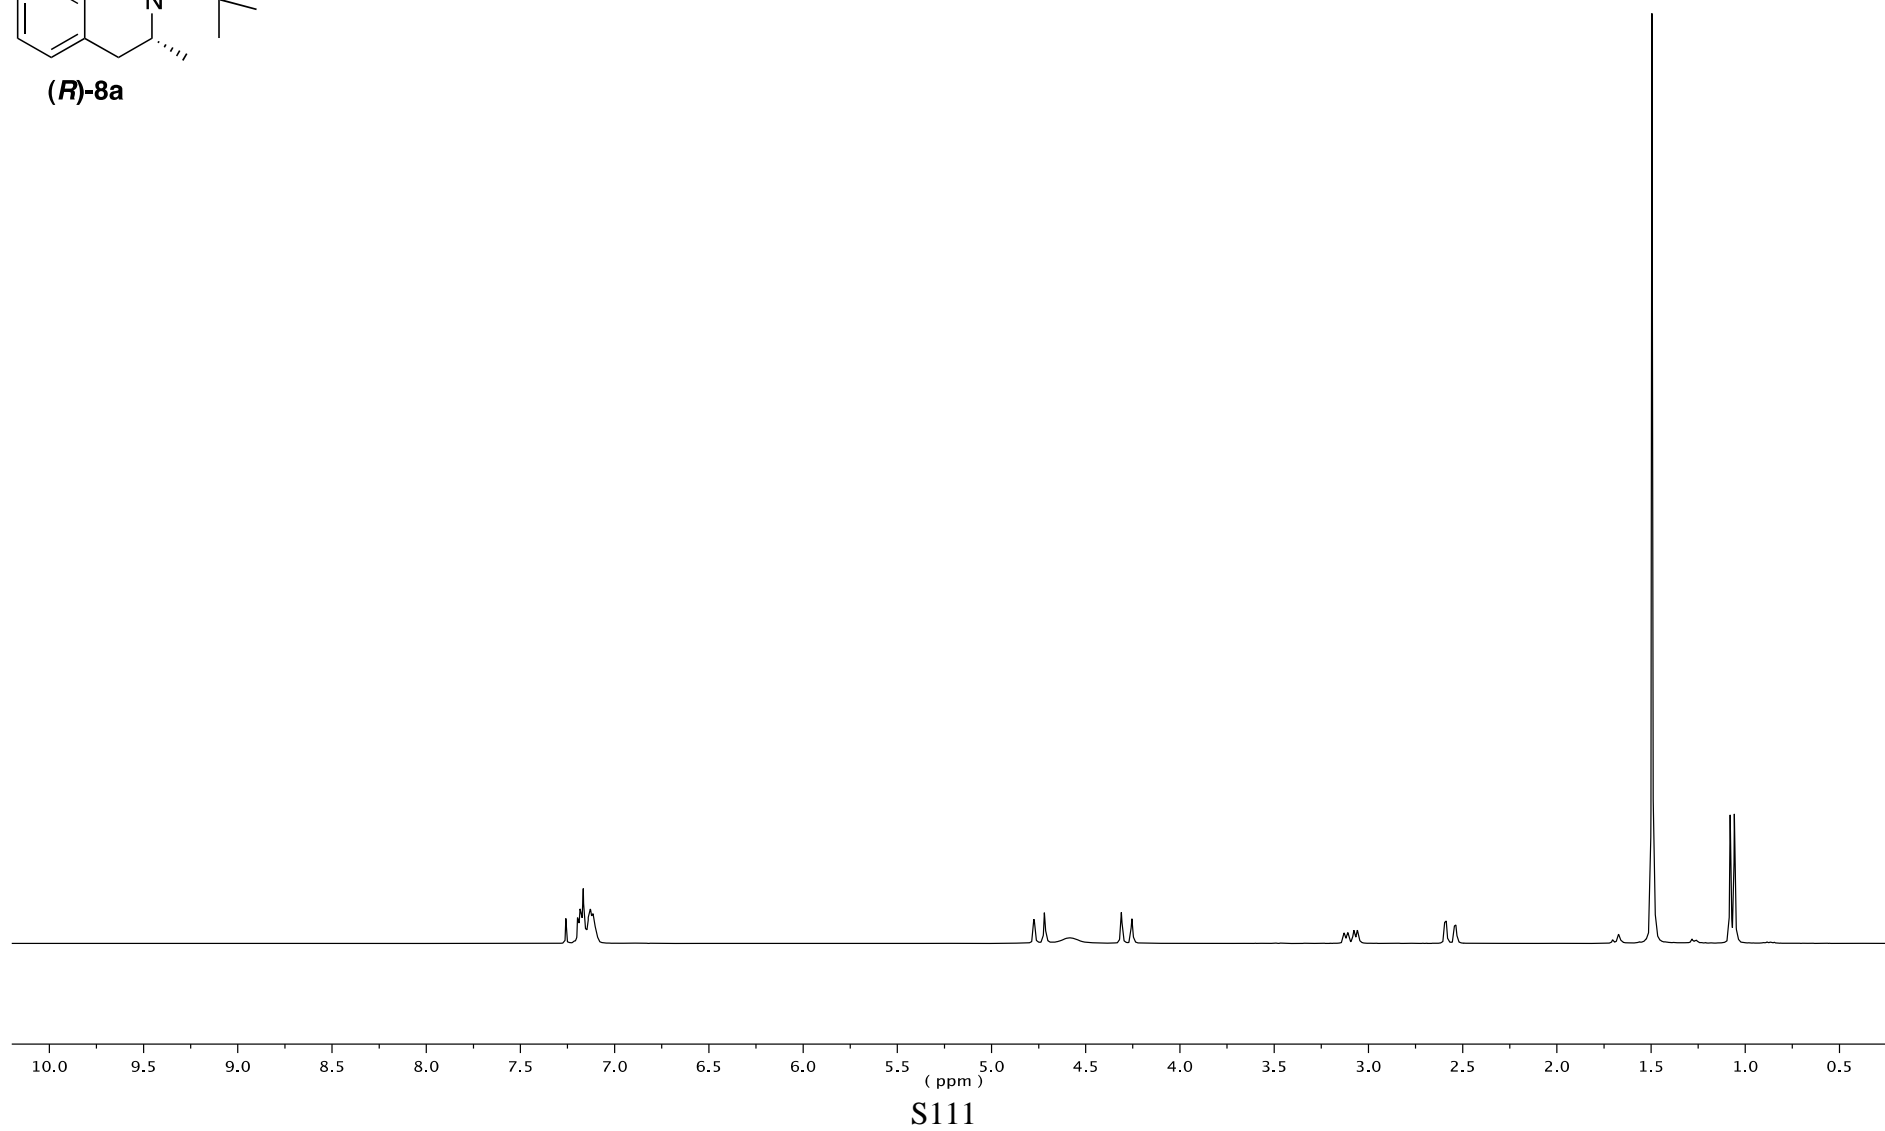

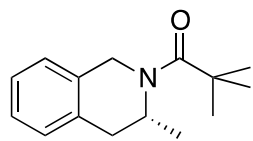

**(R)-8a**

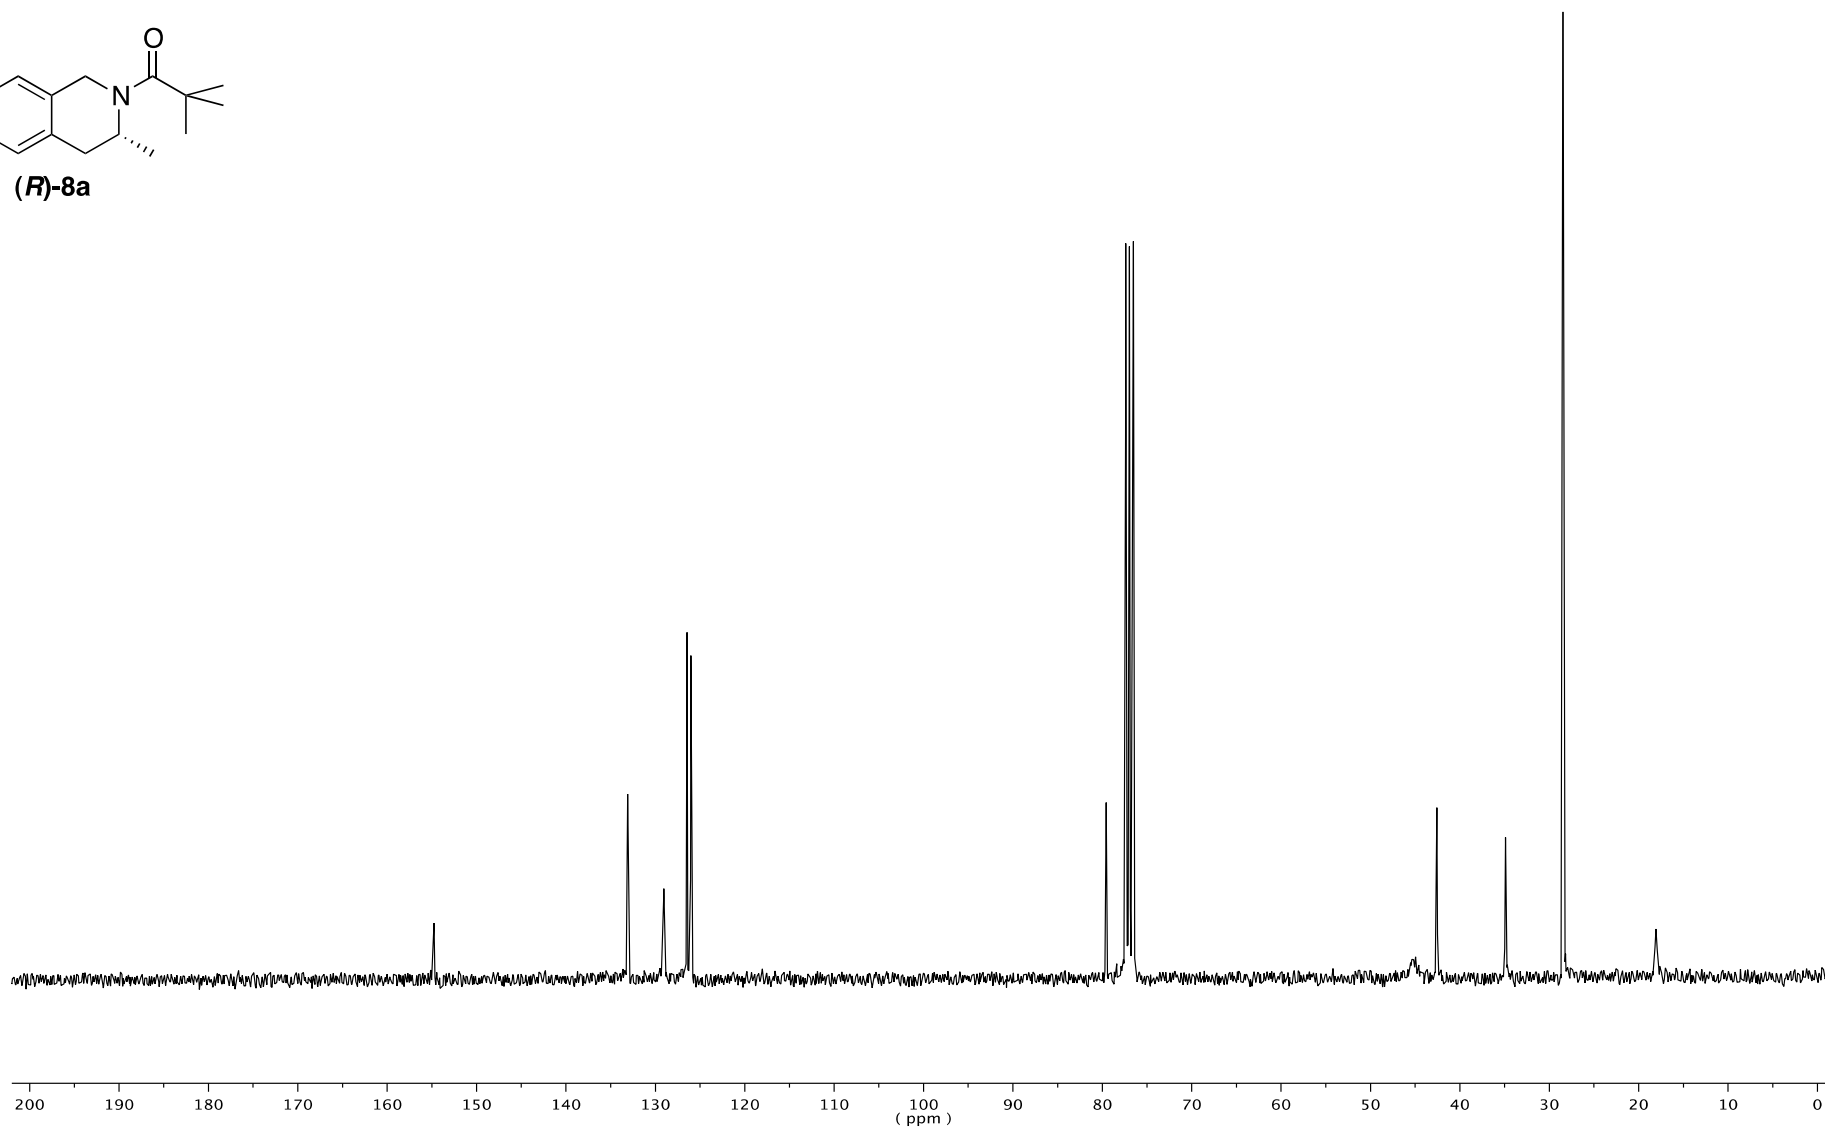



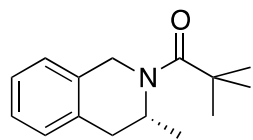

**(R)-8a**

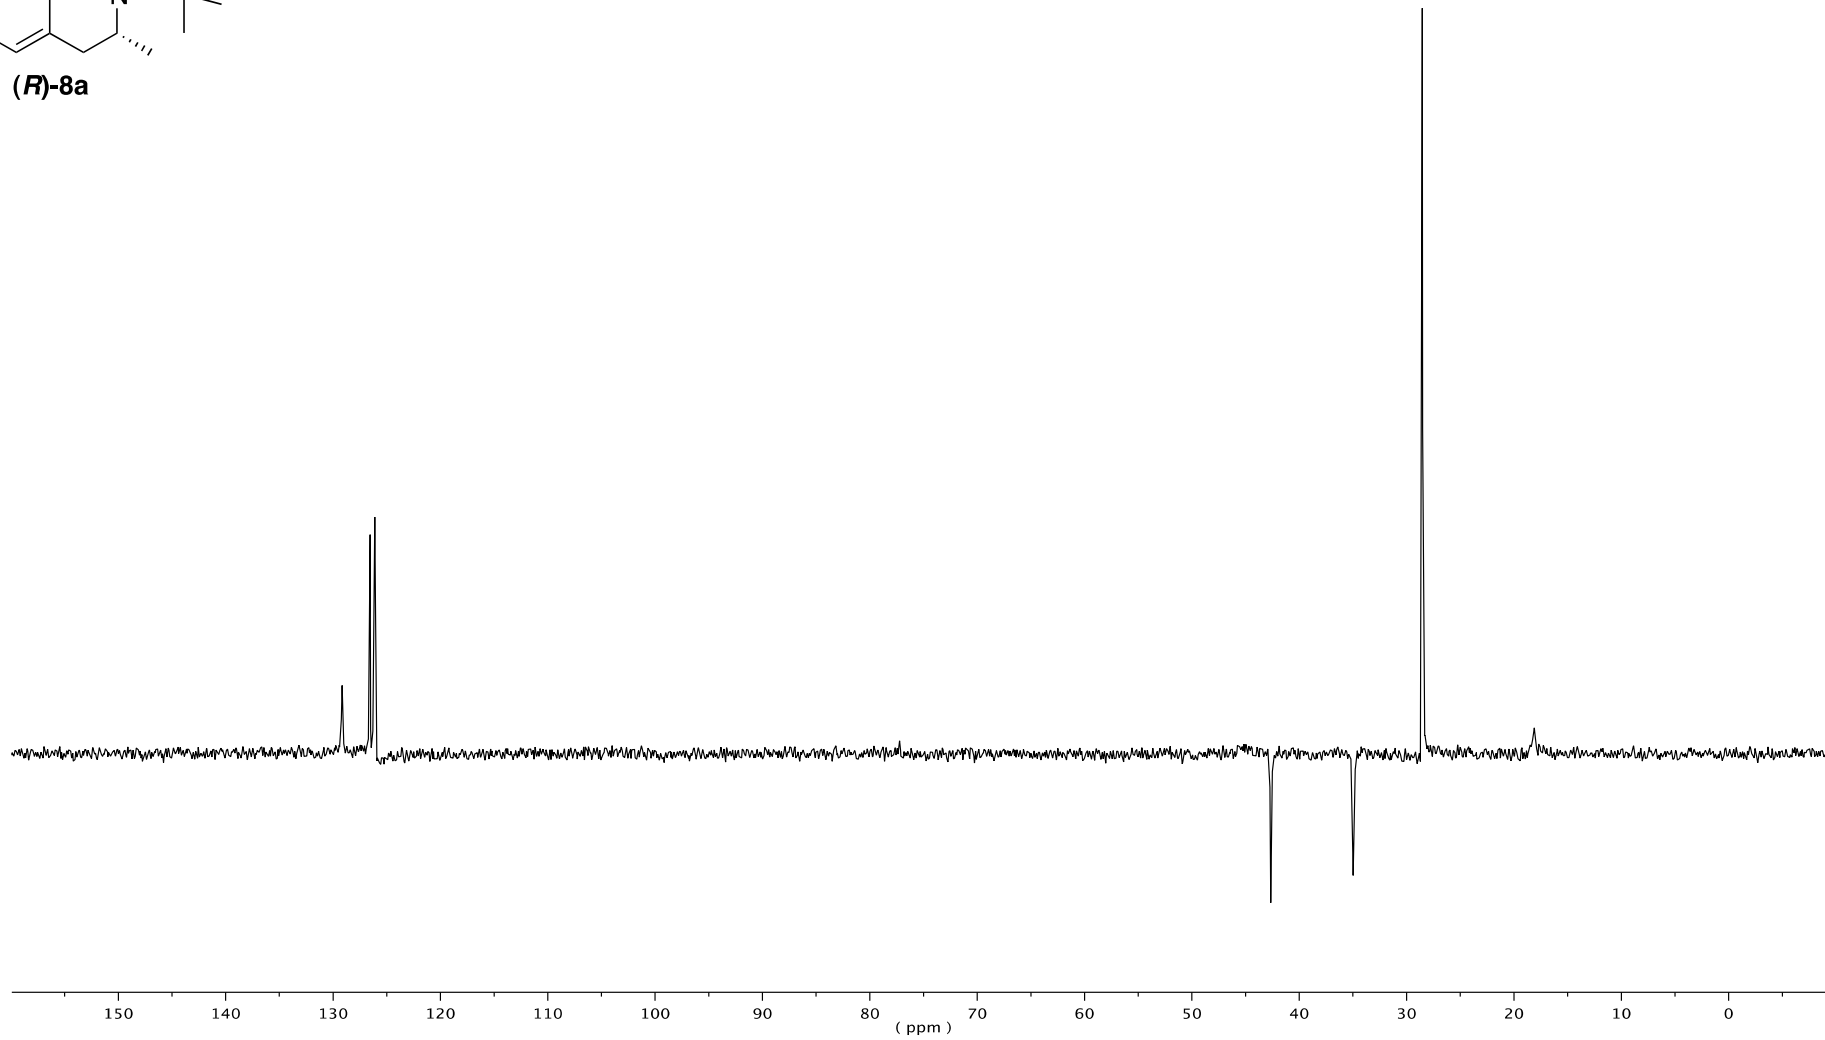

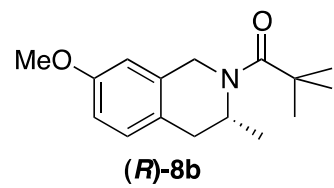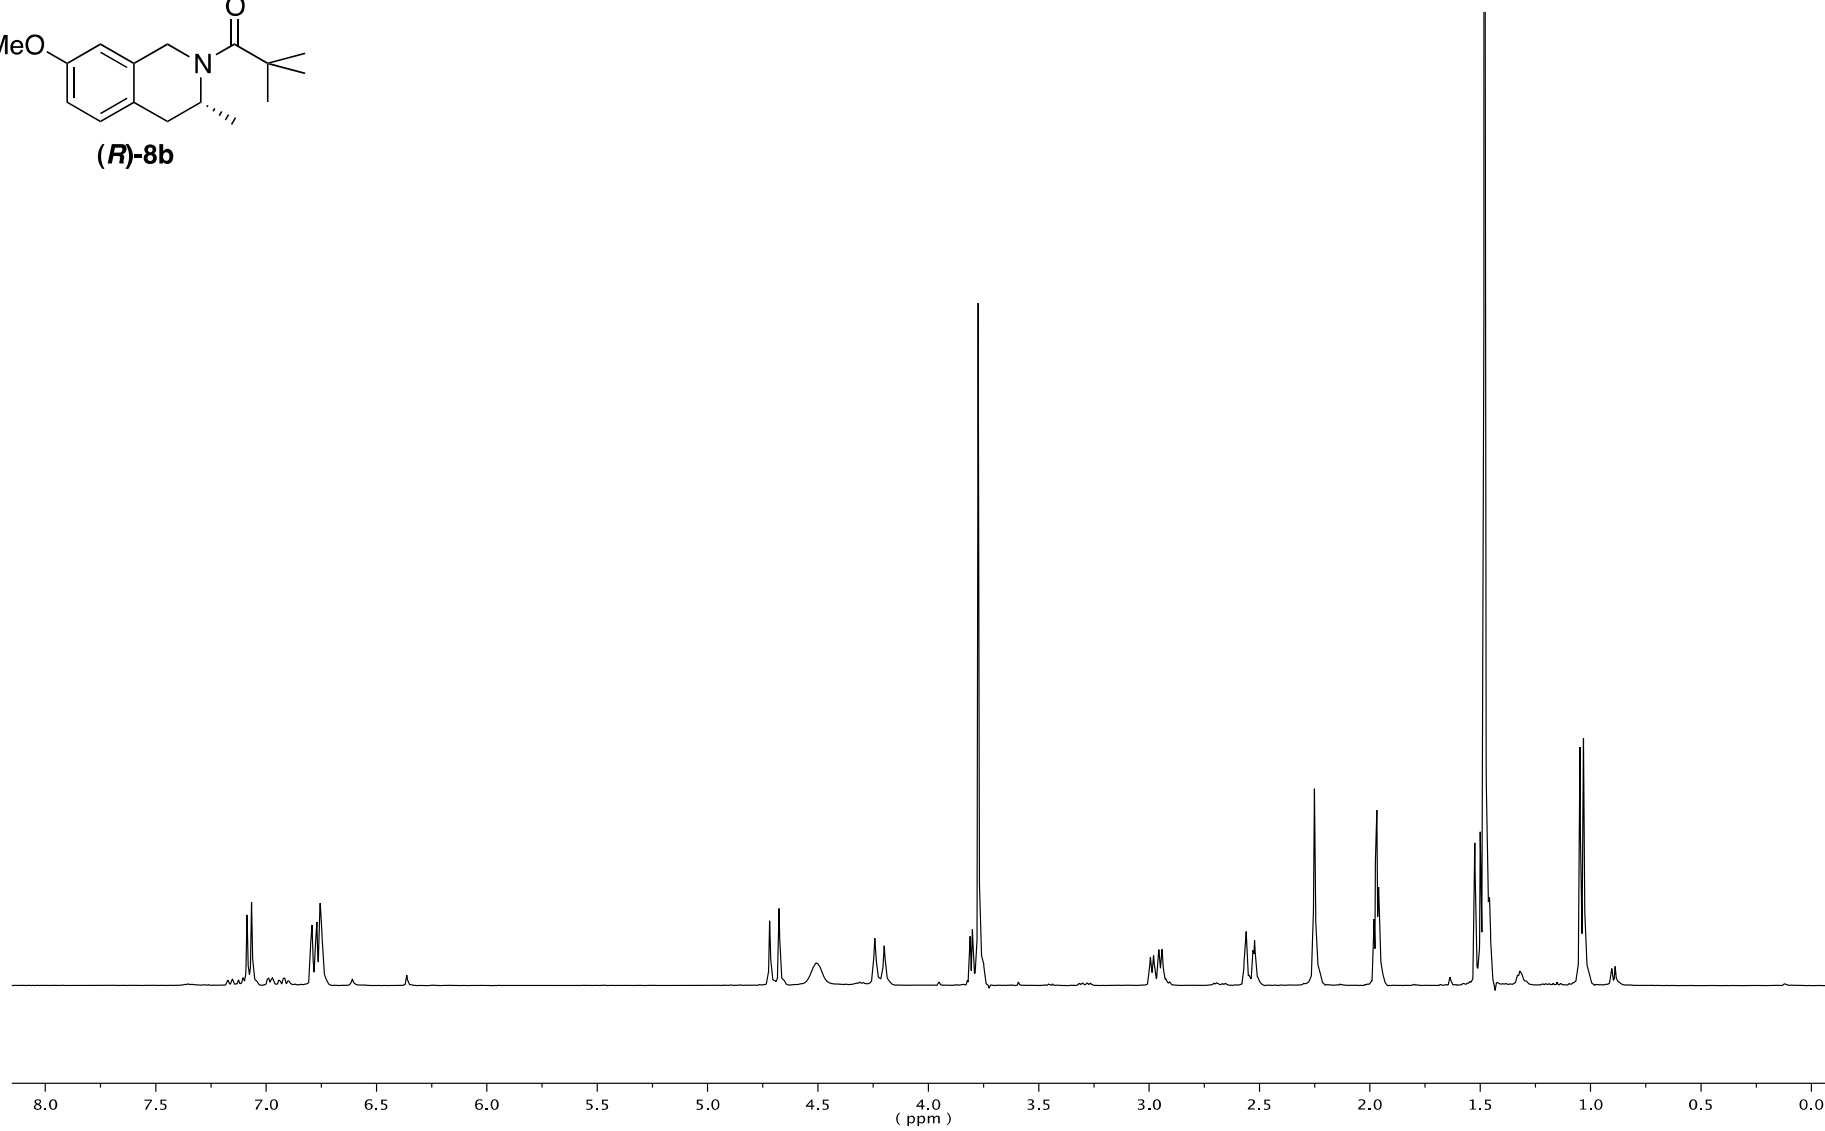

S114

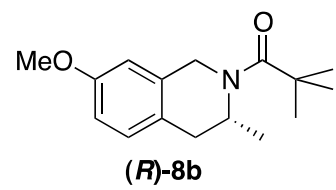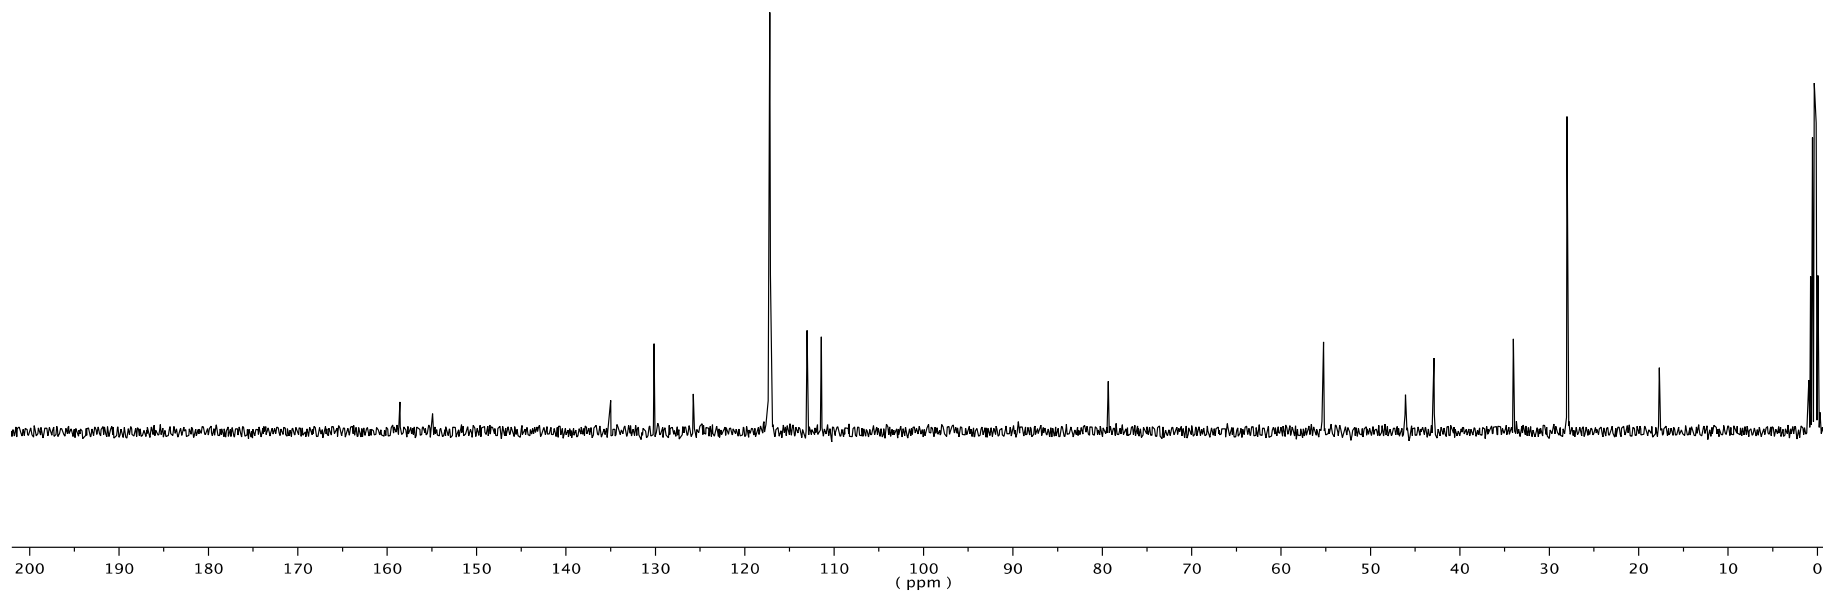

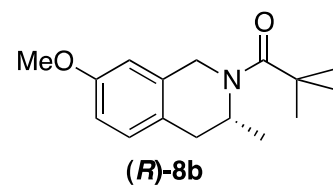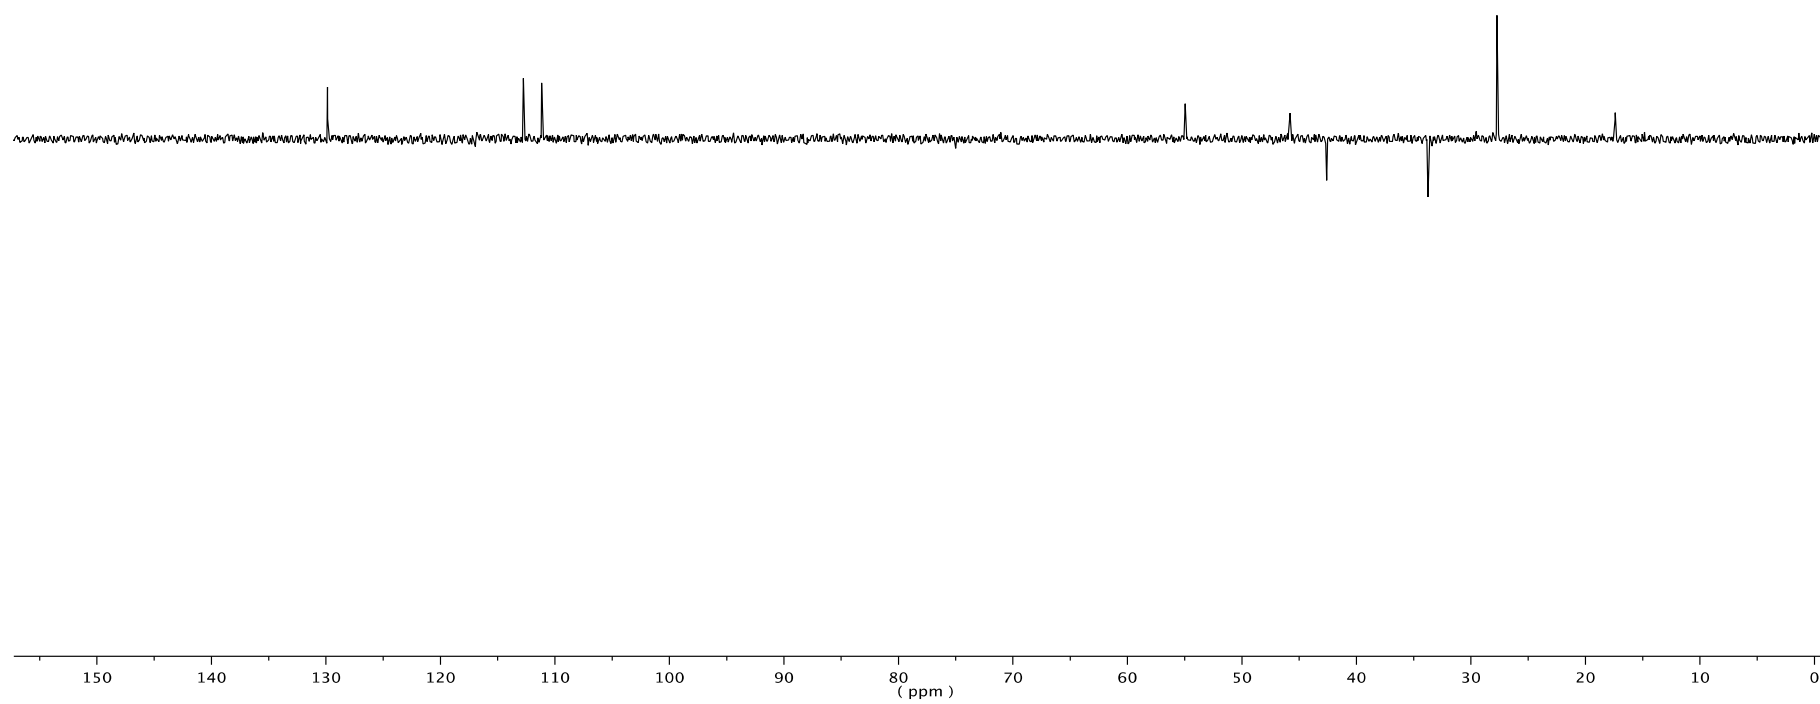

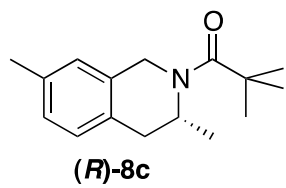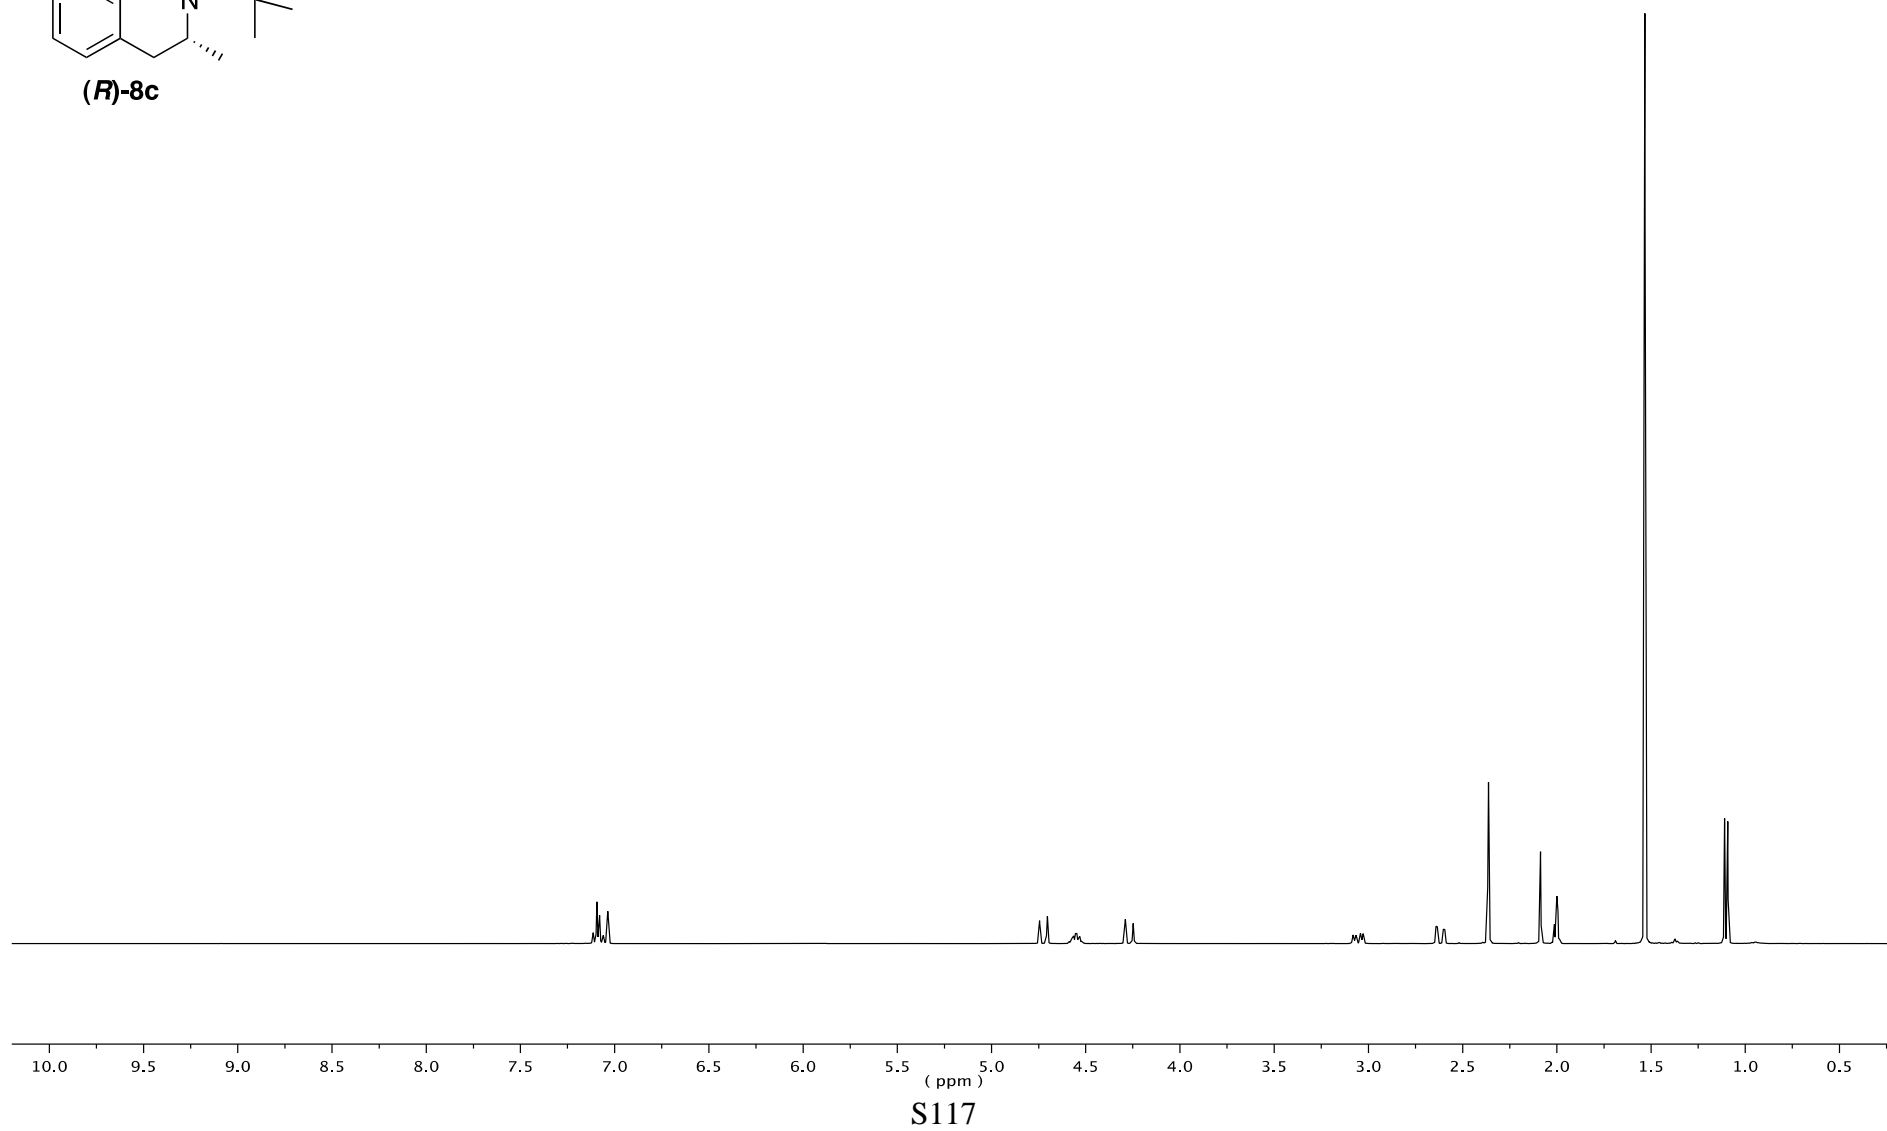

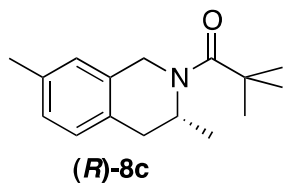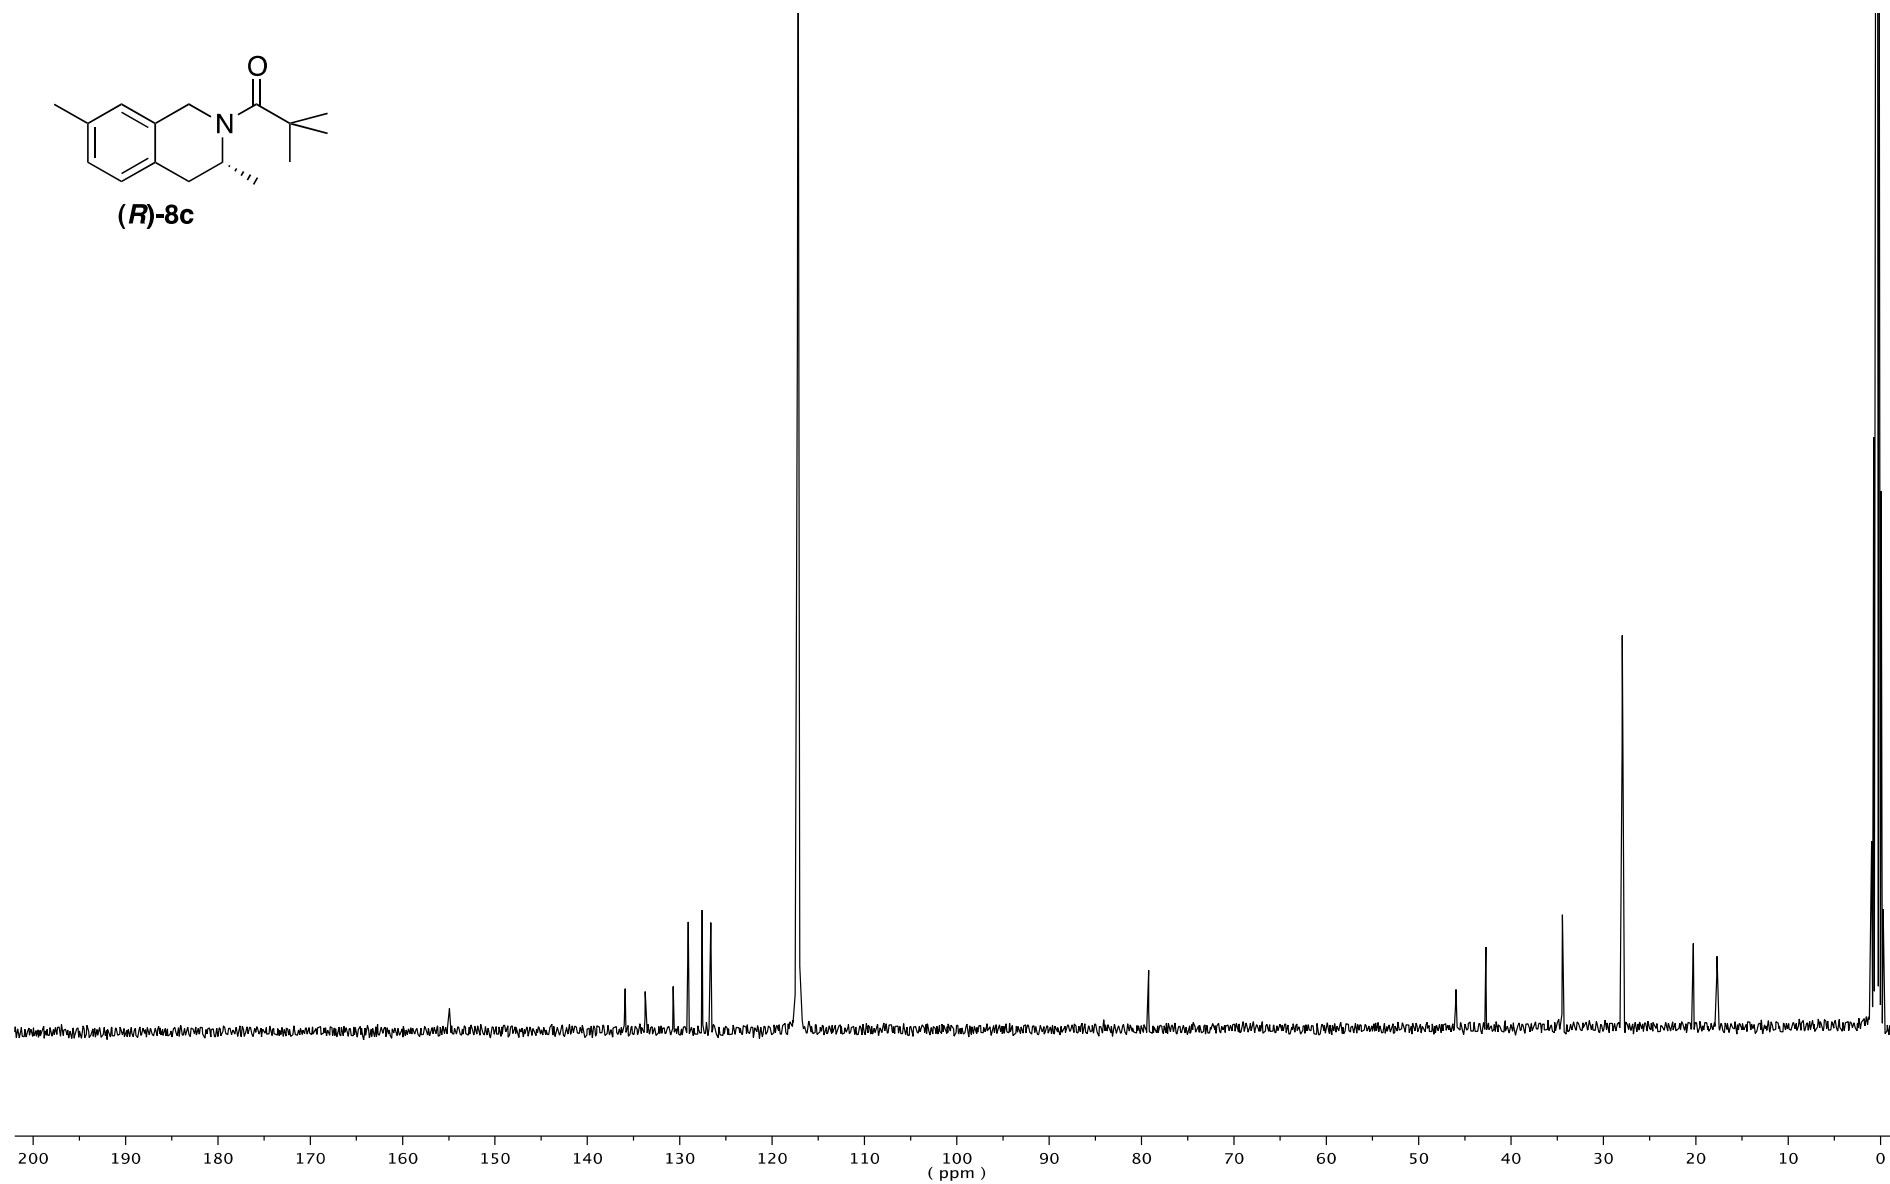

S118

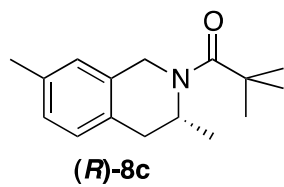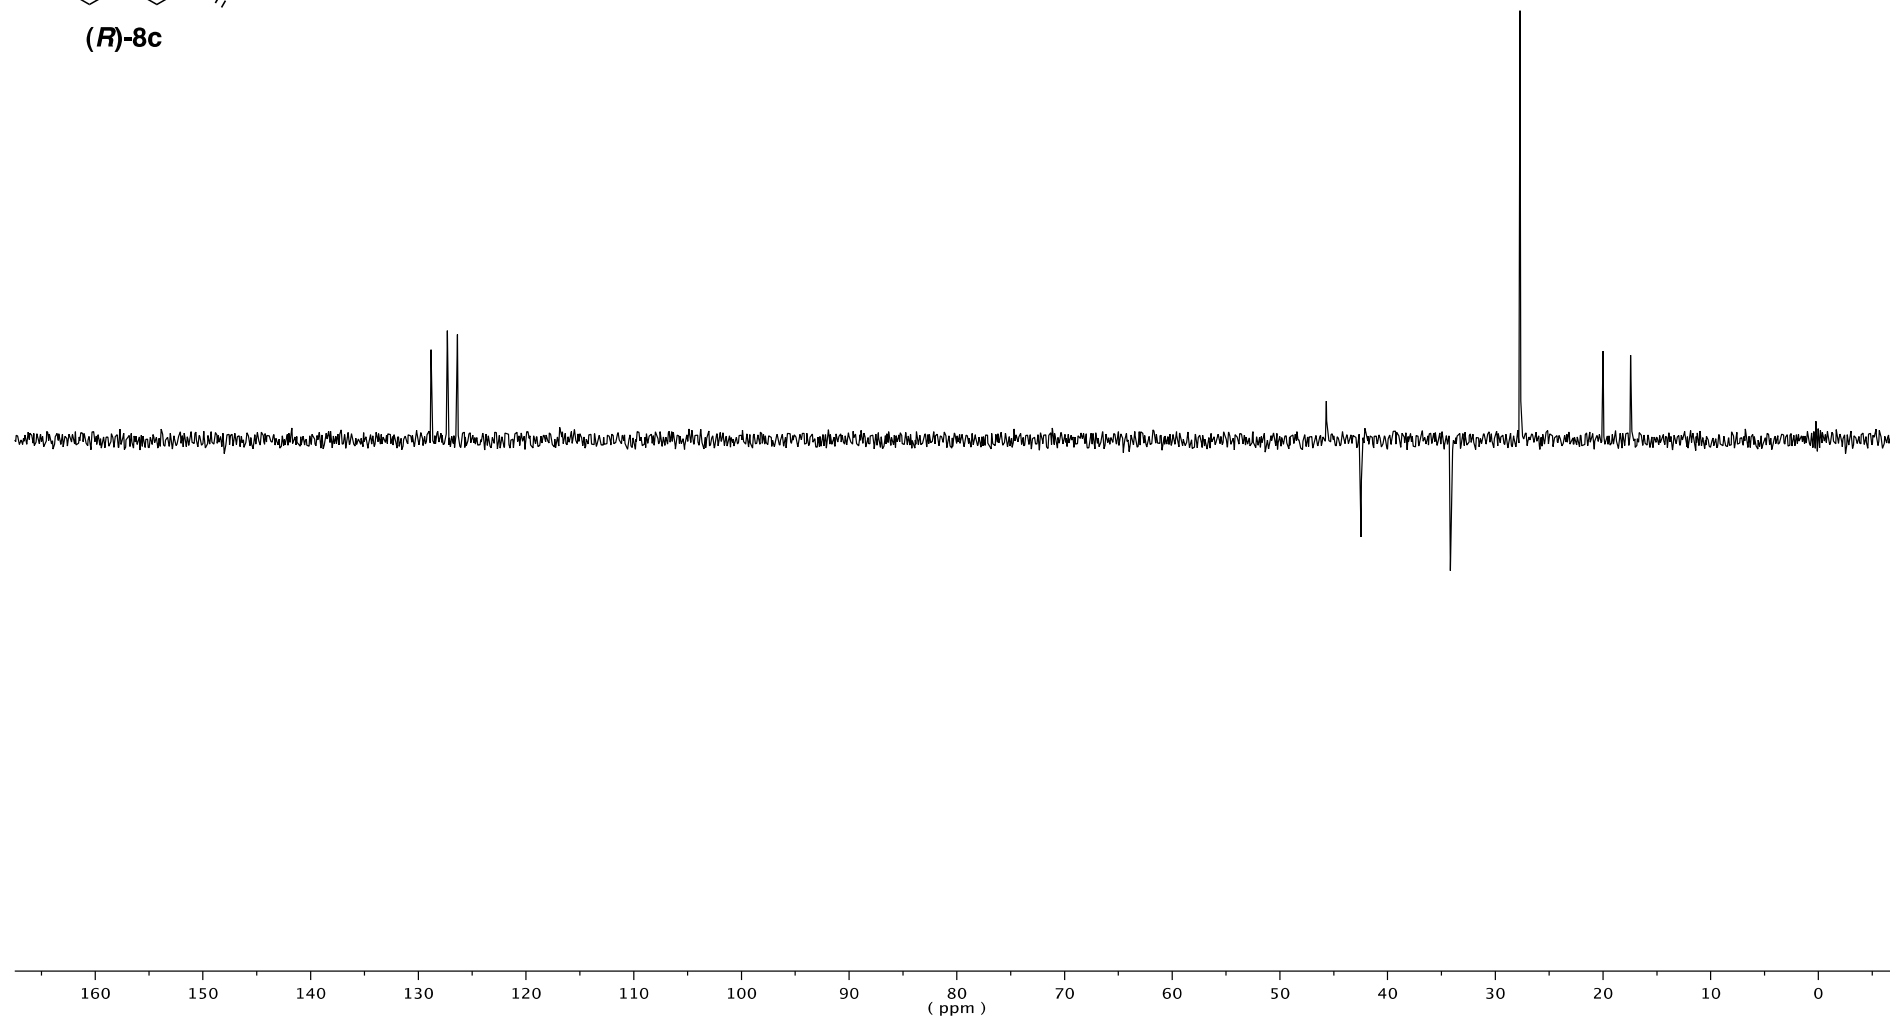

S119

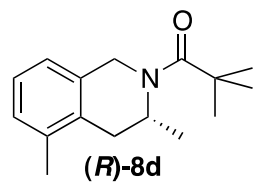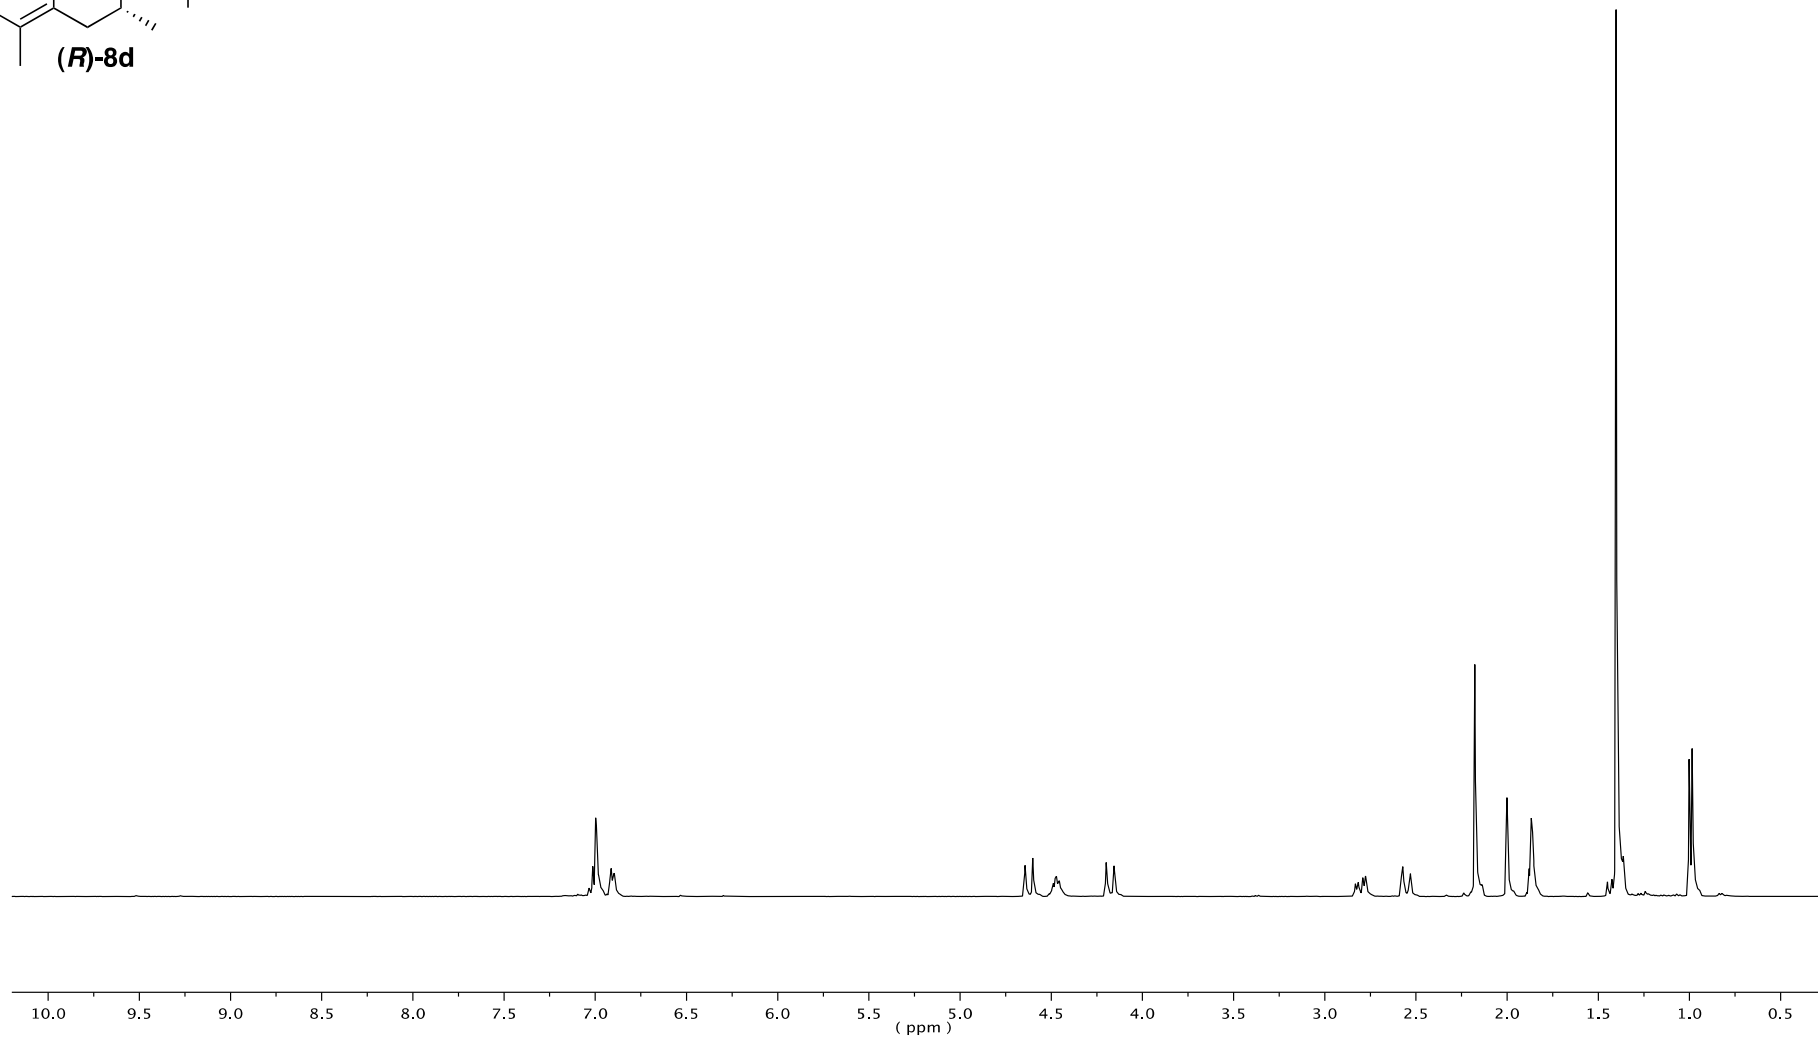



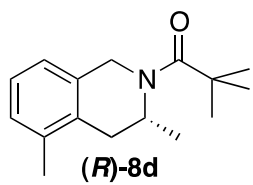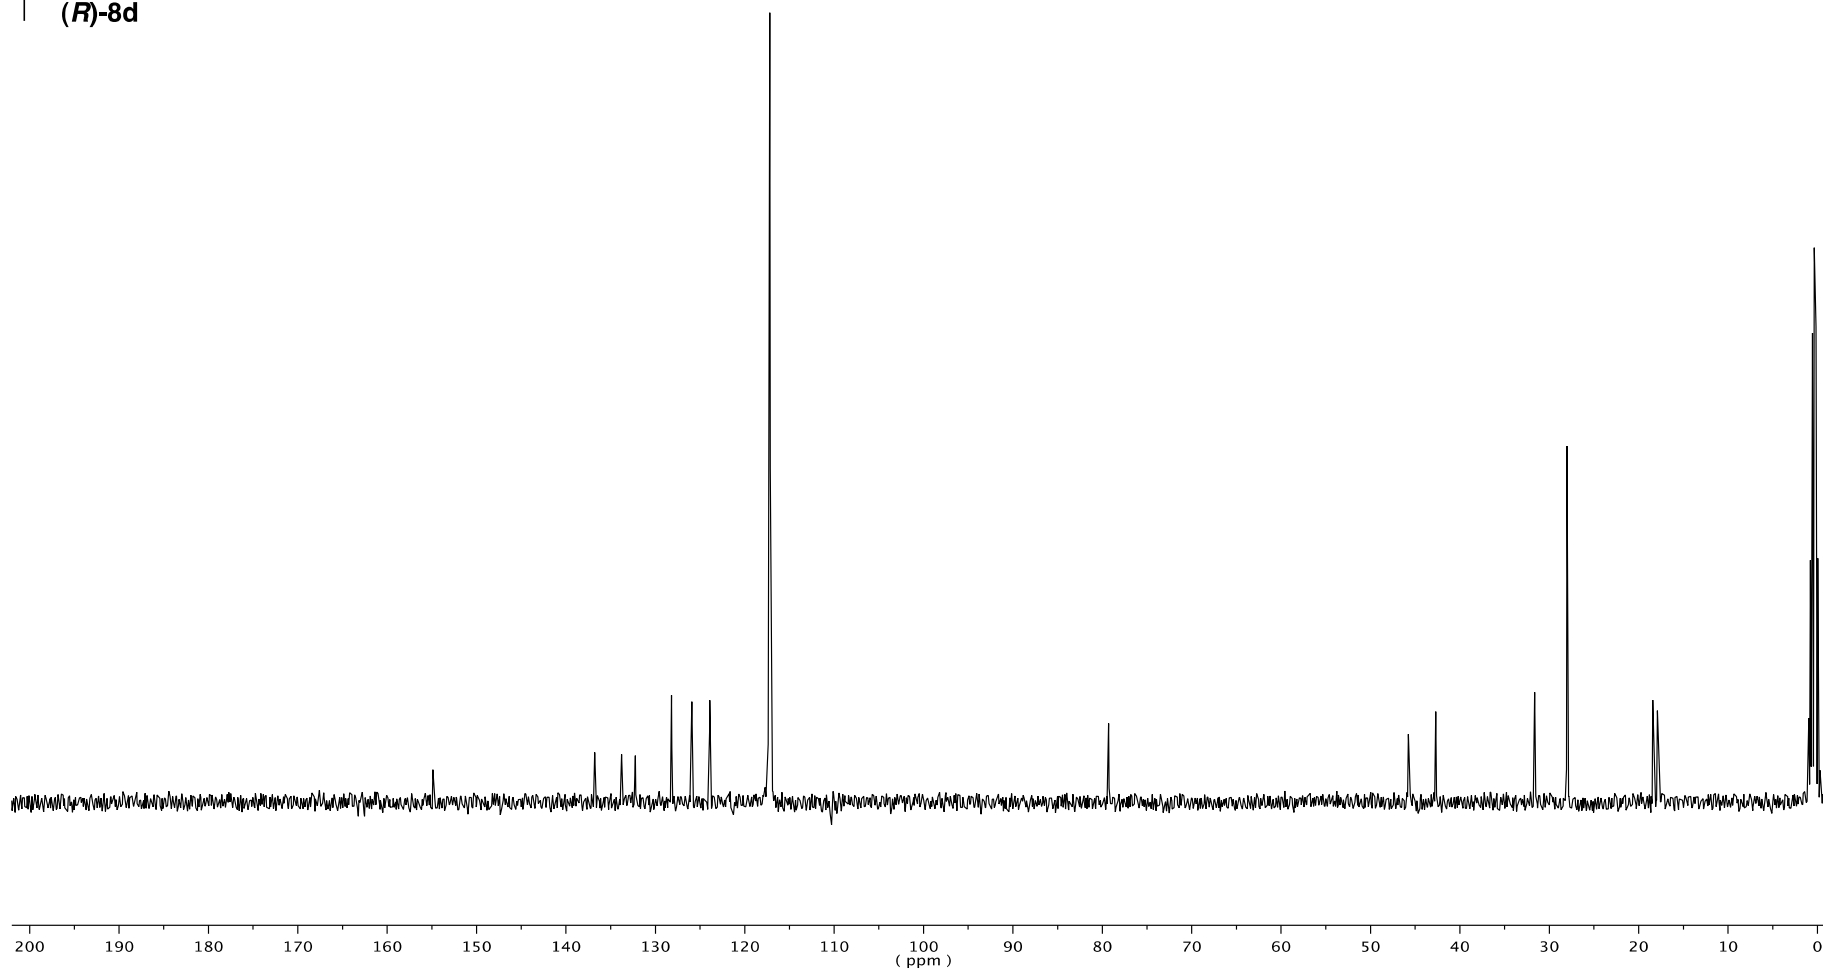

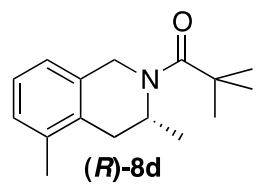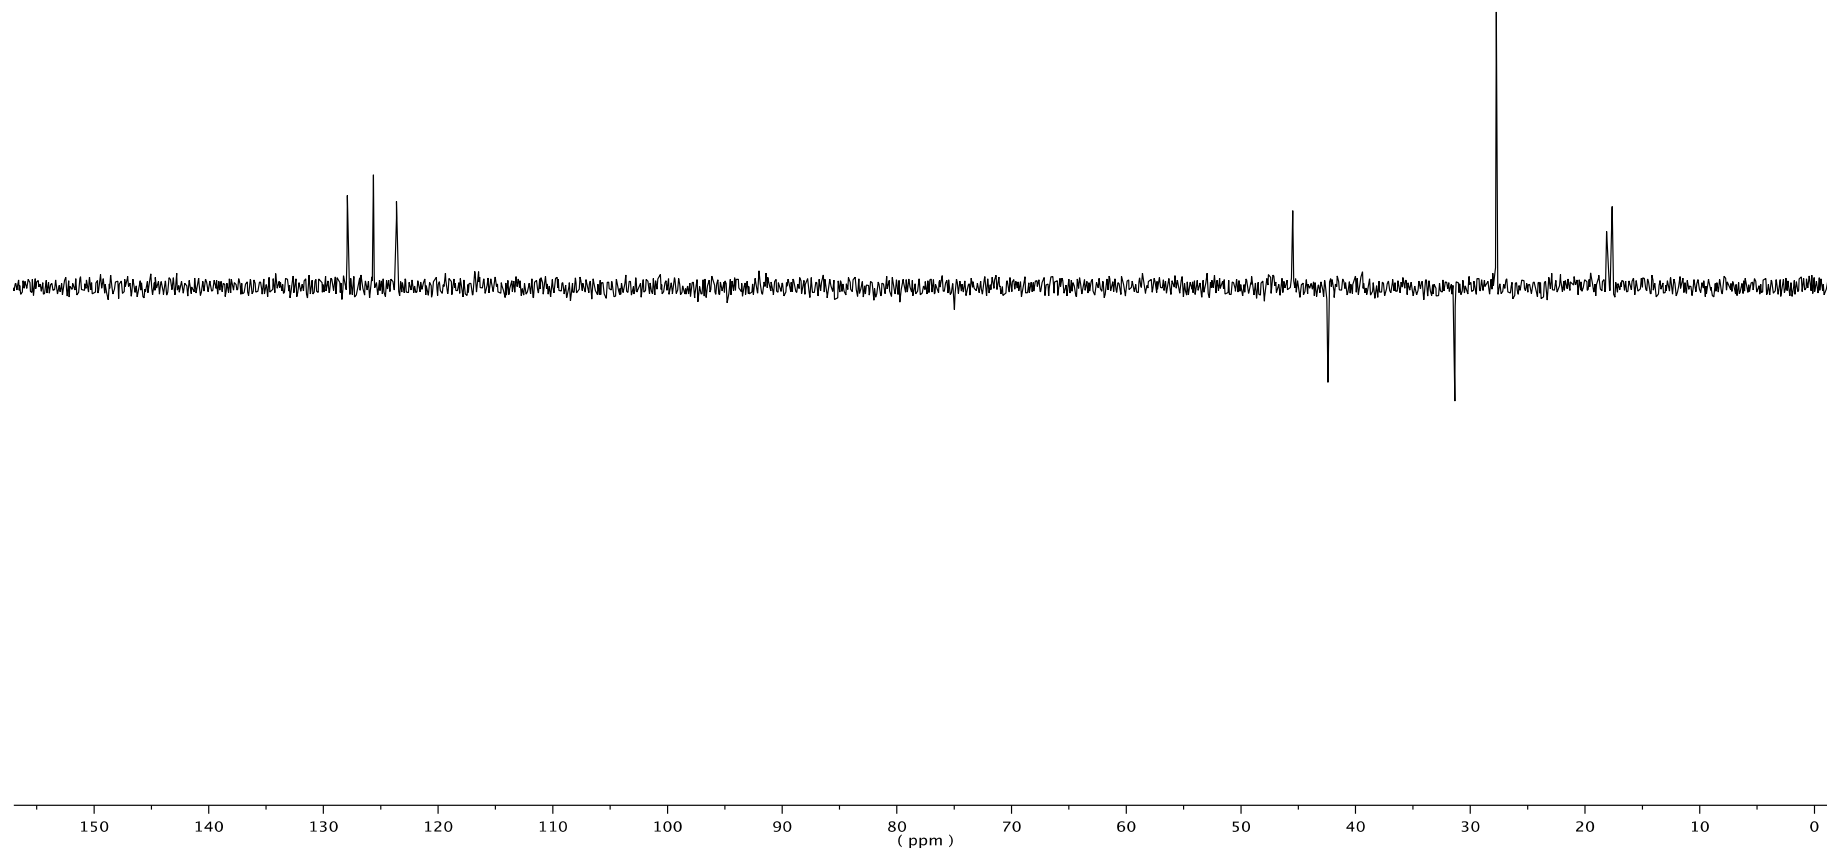

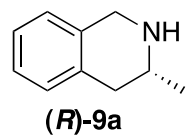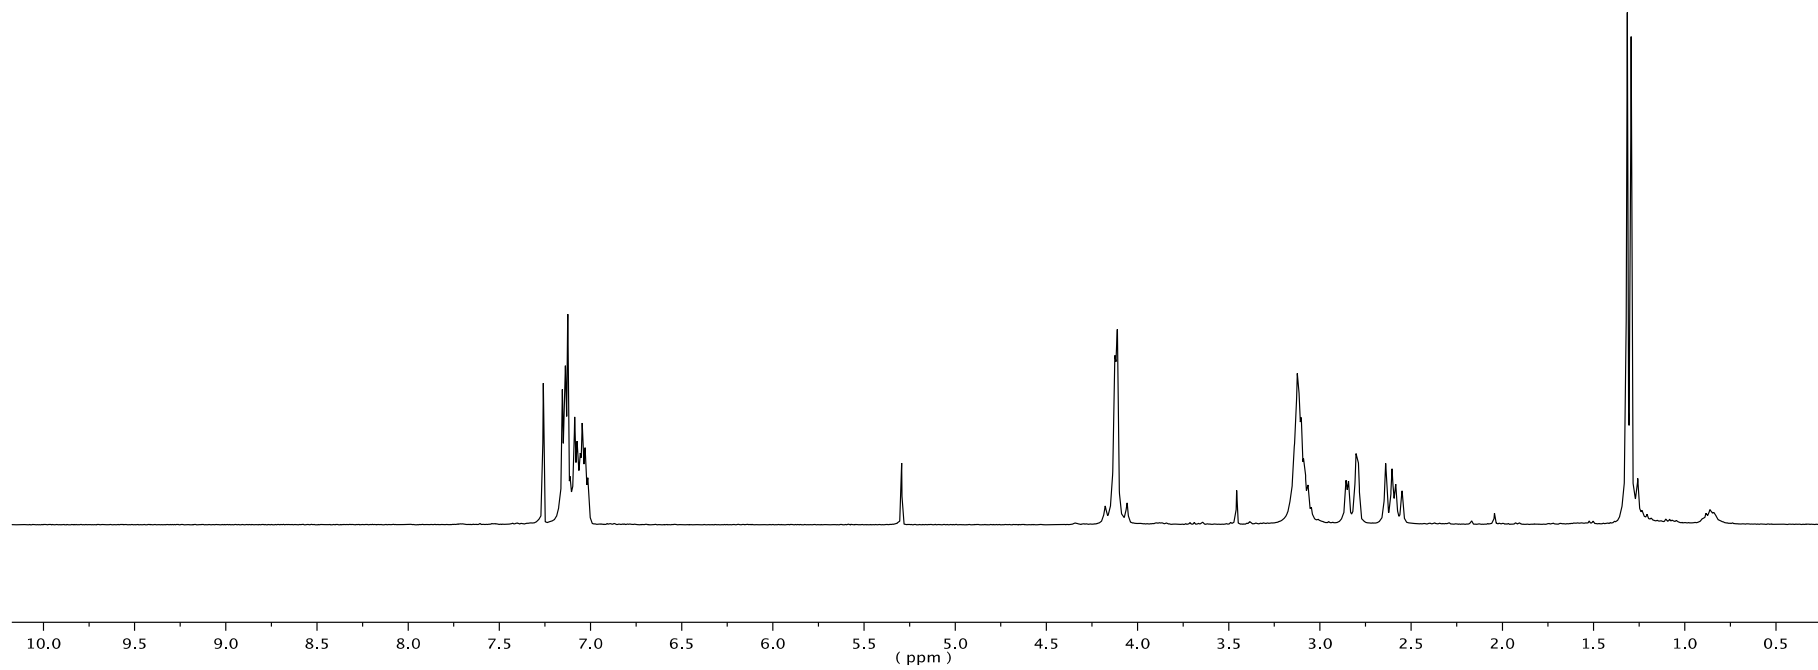

S123

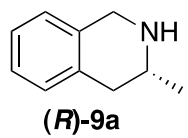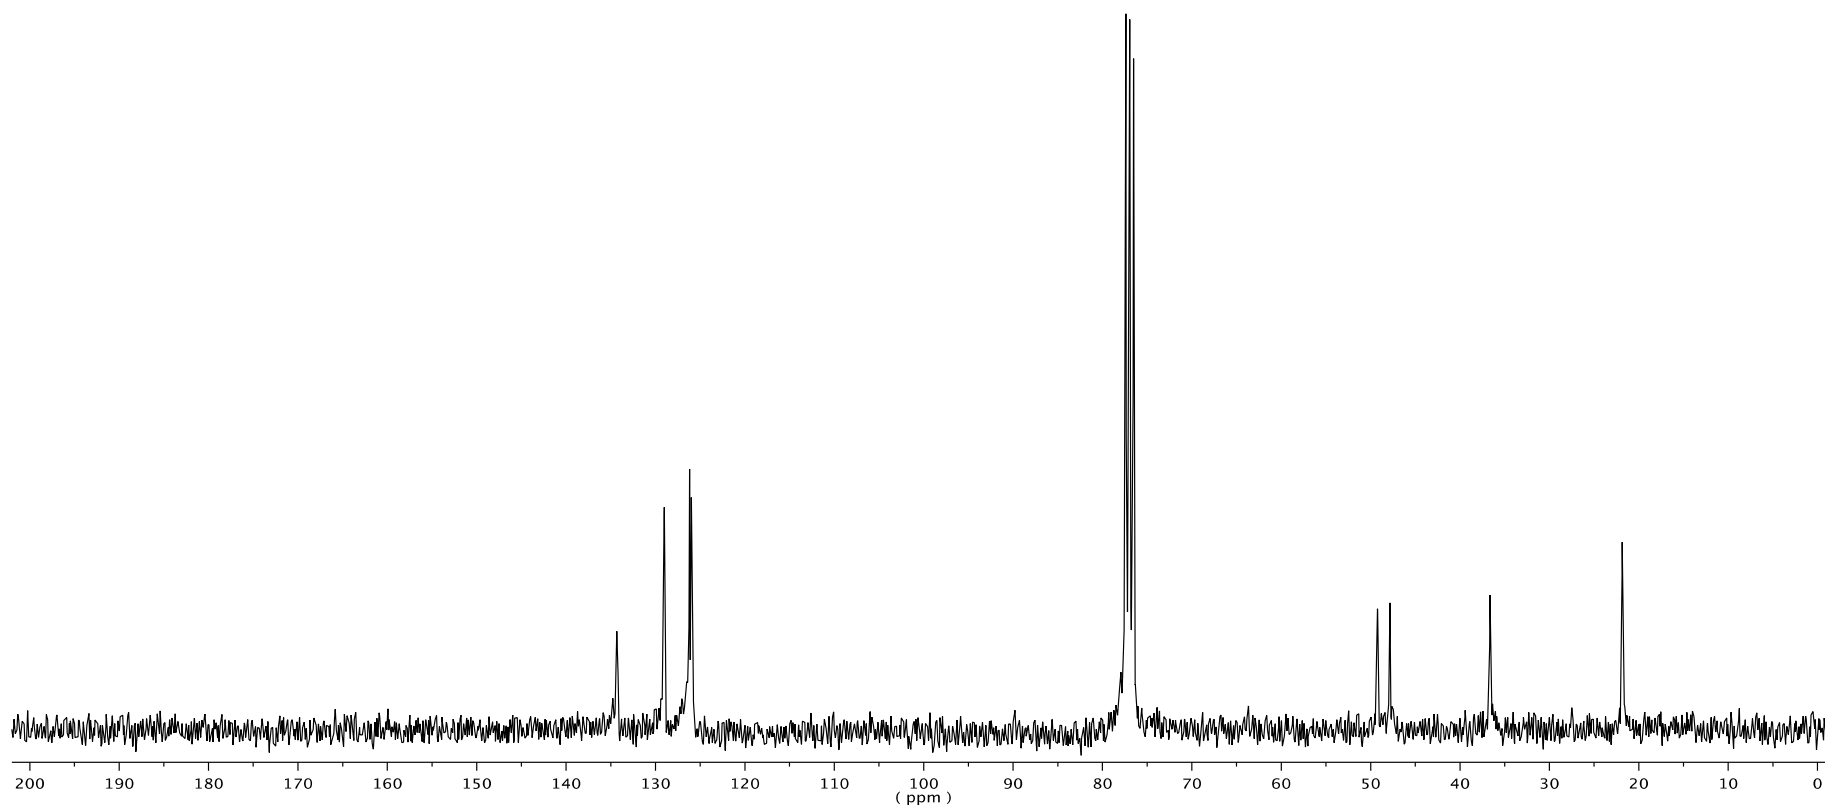

S124

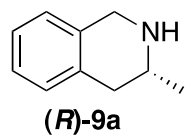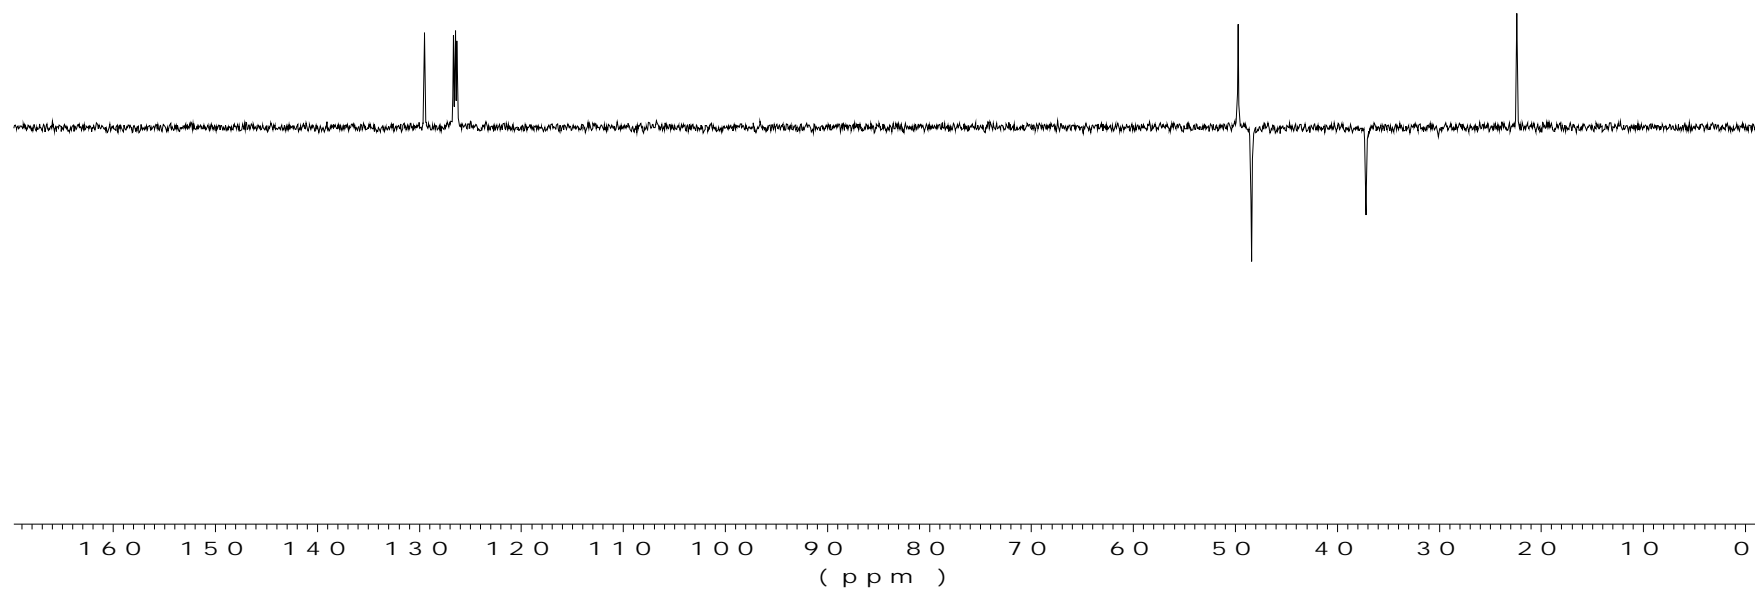

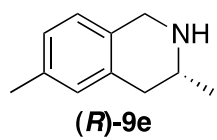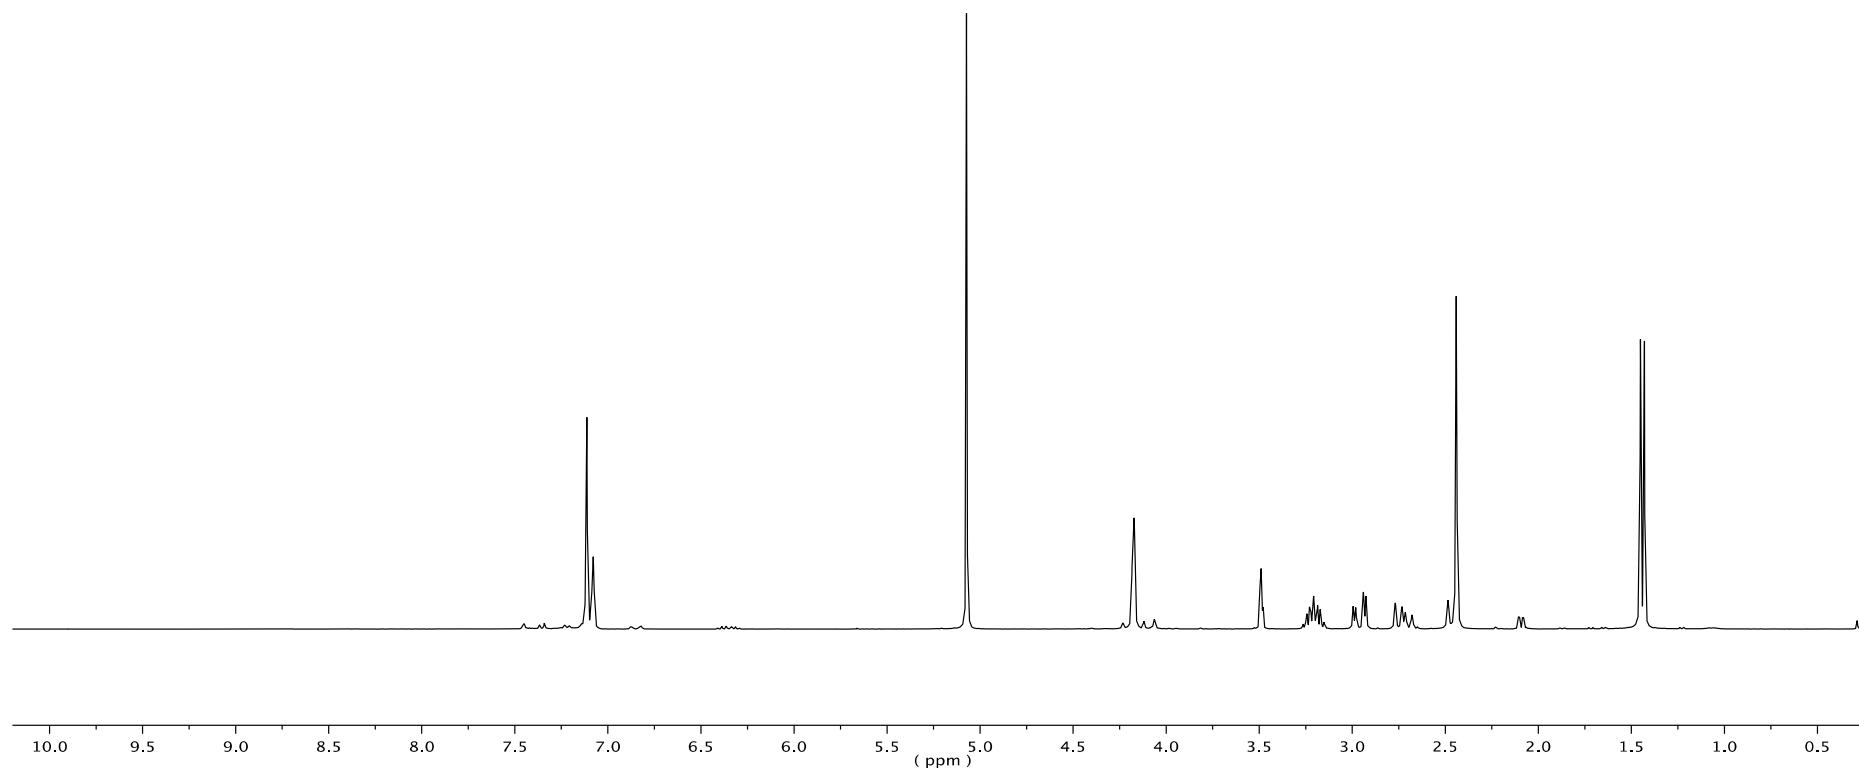

S126

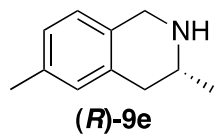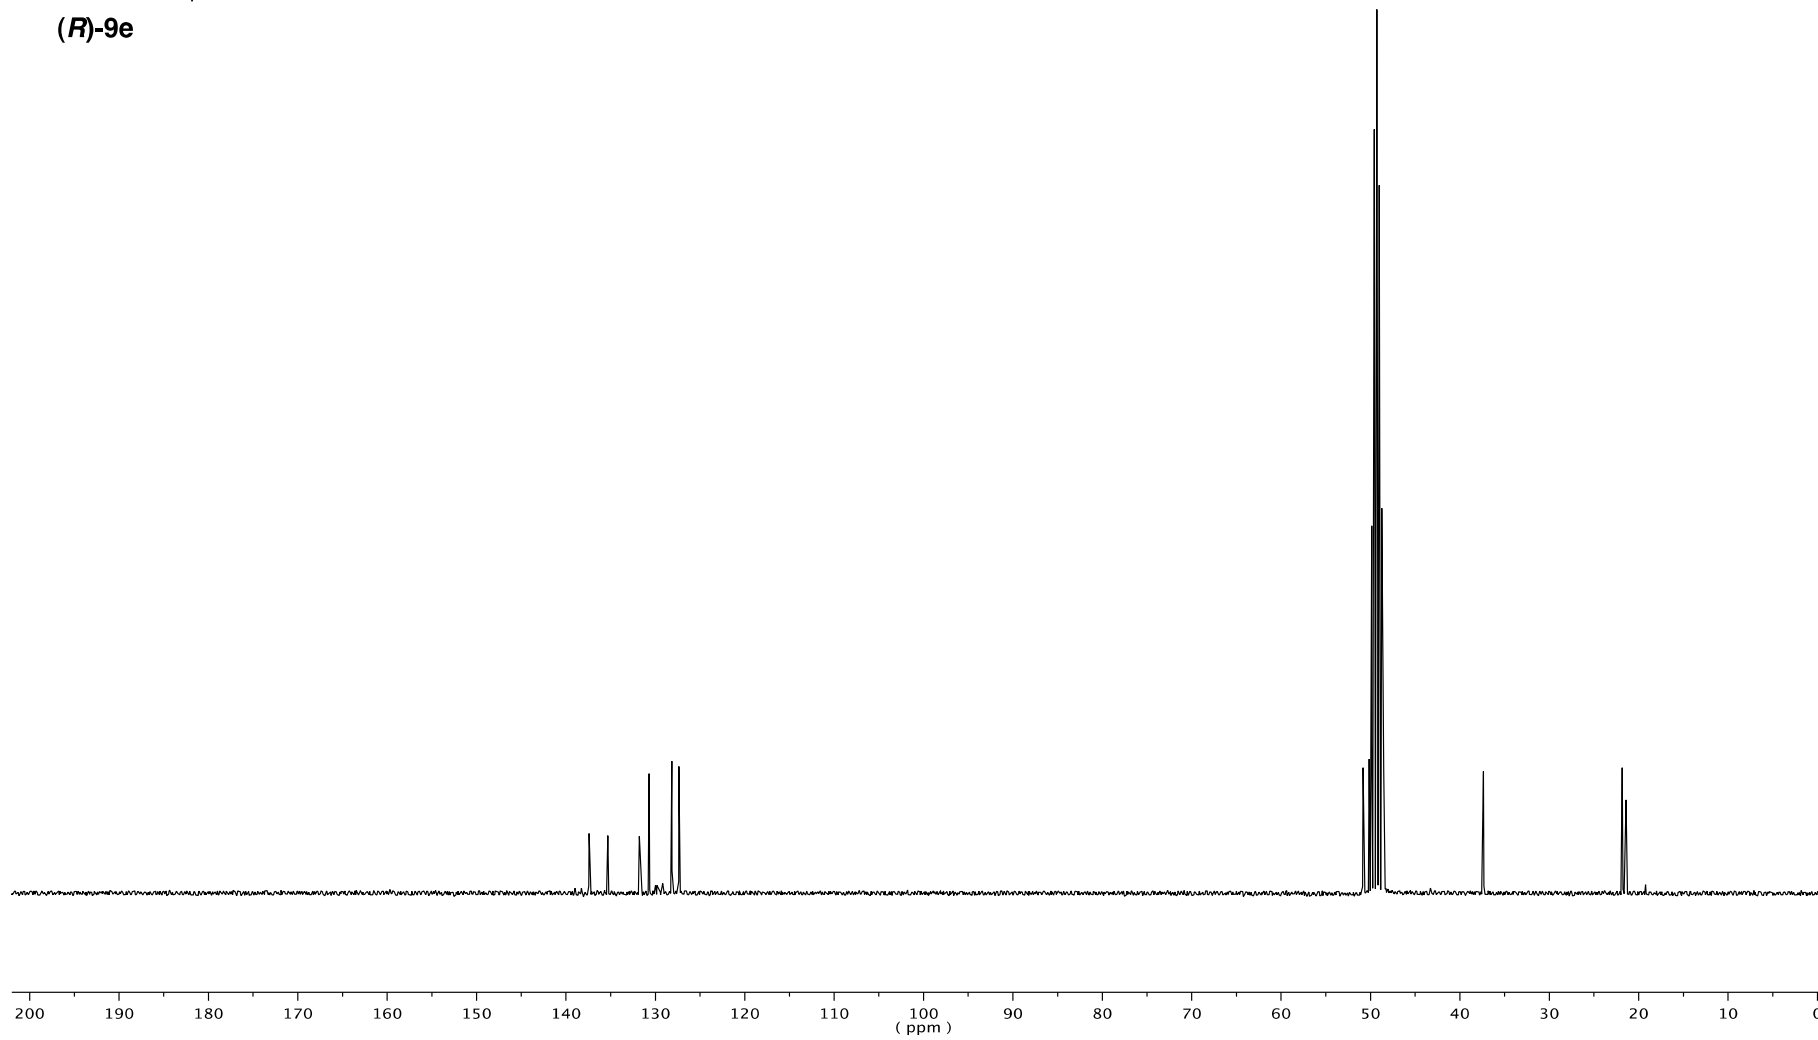

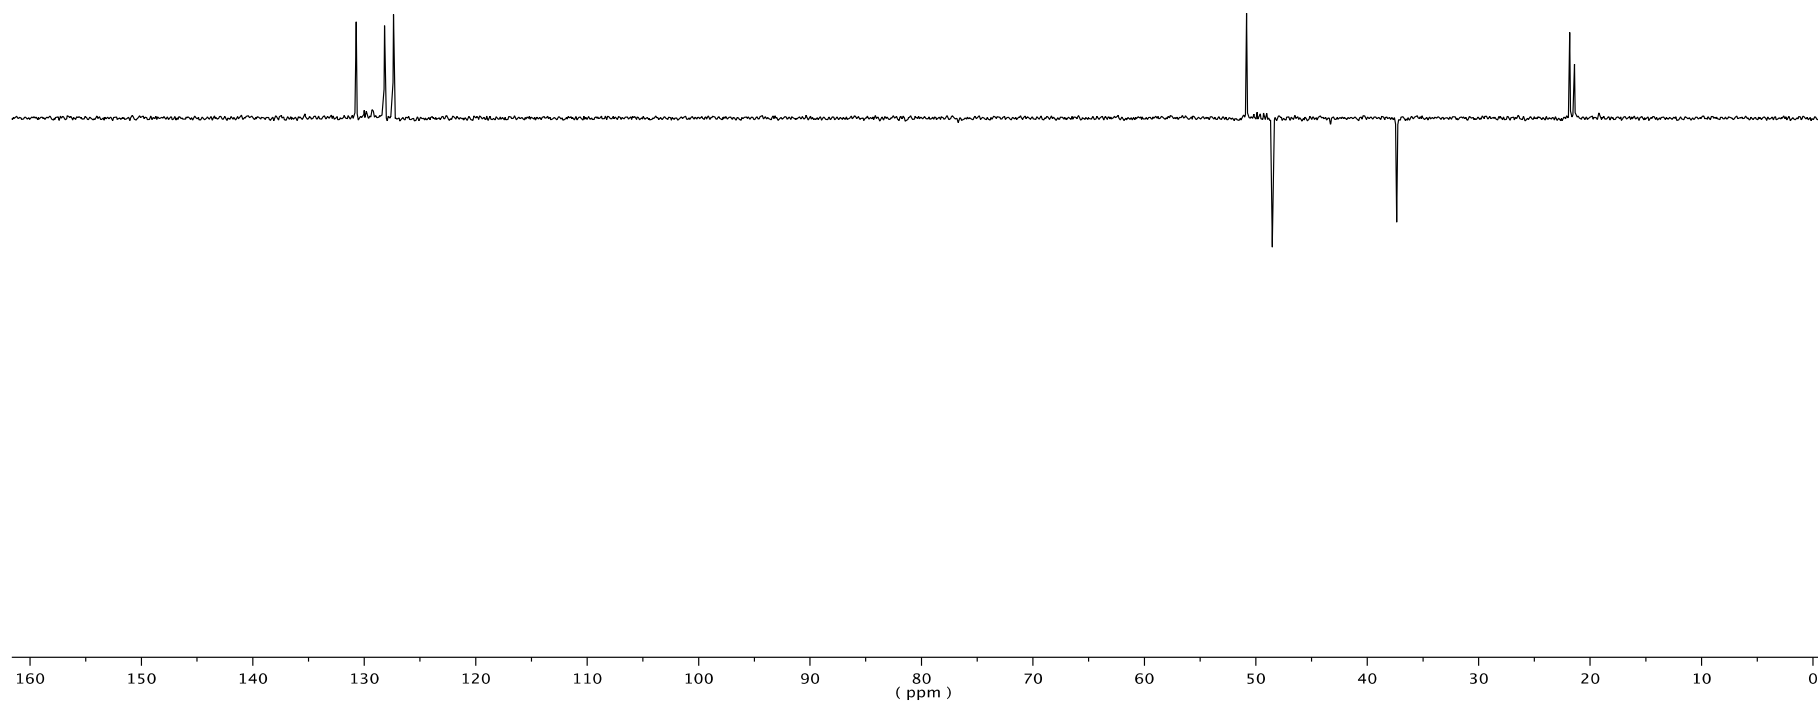



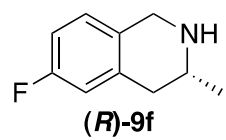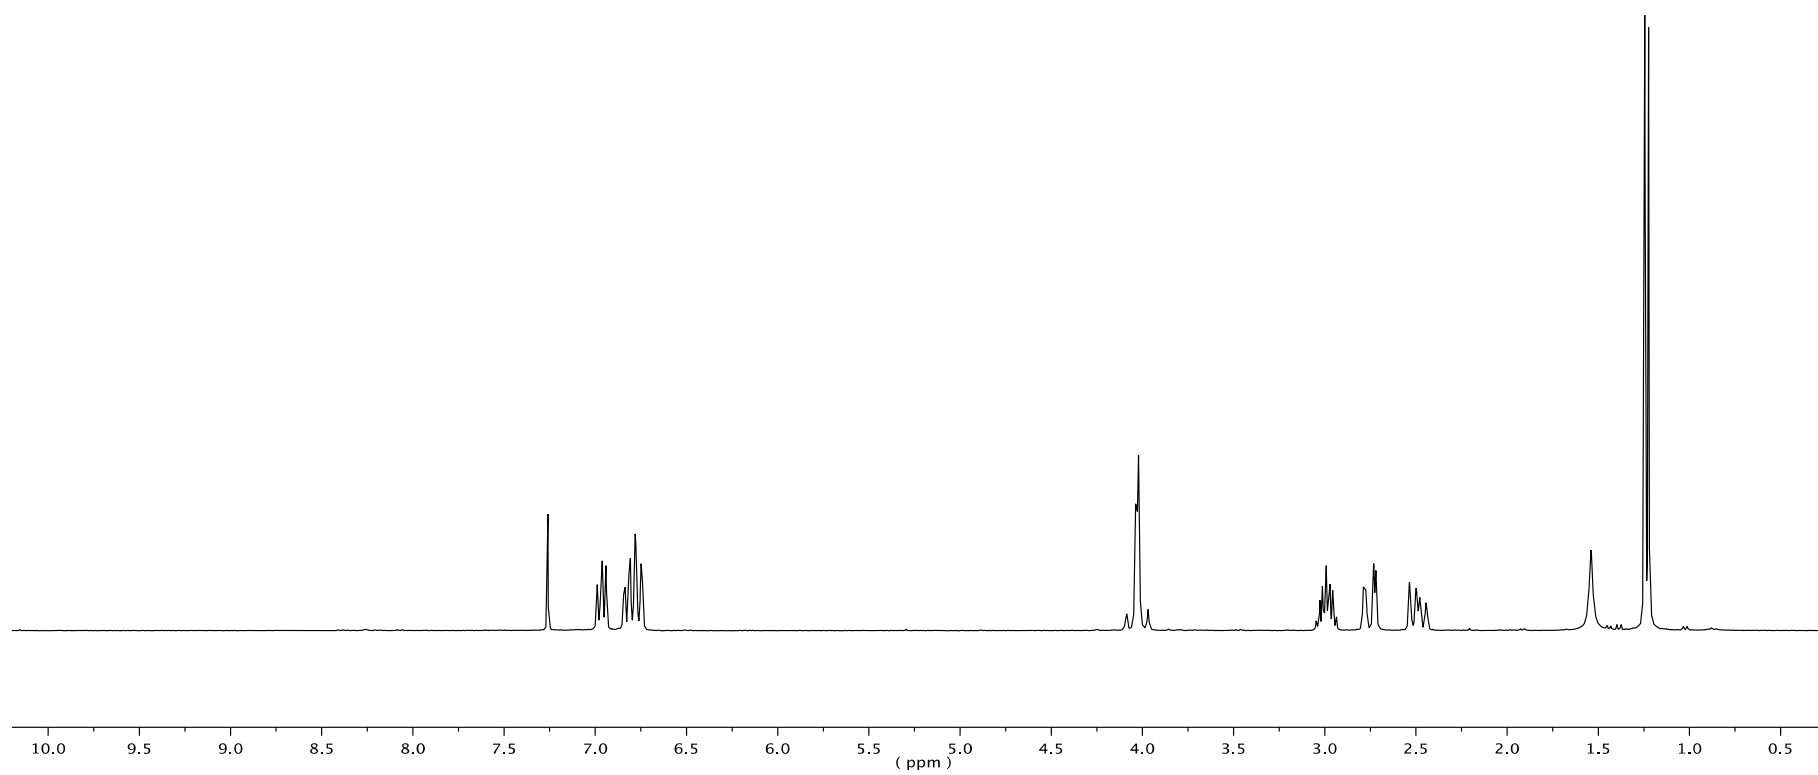

S129

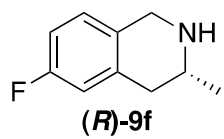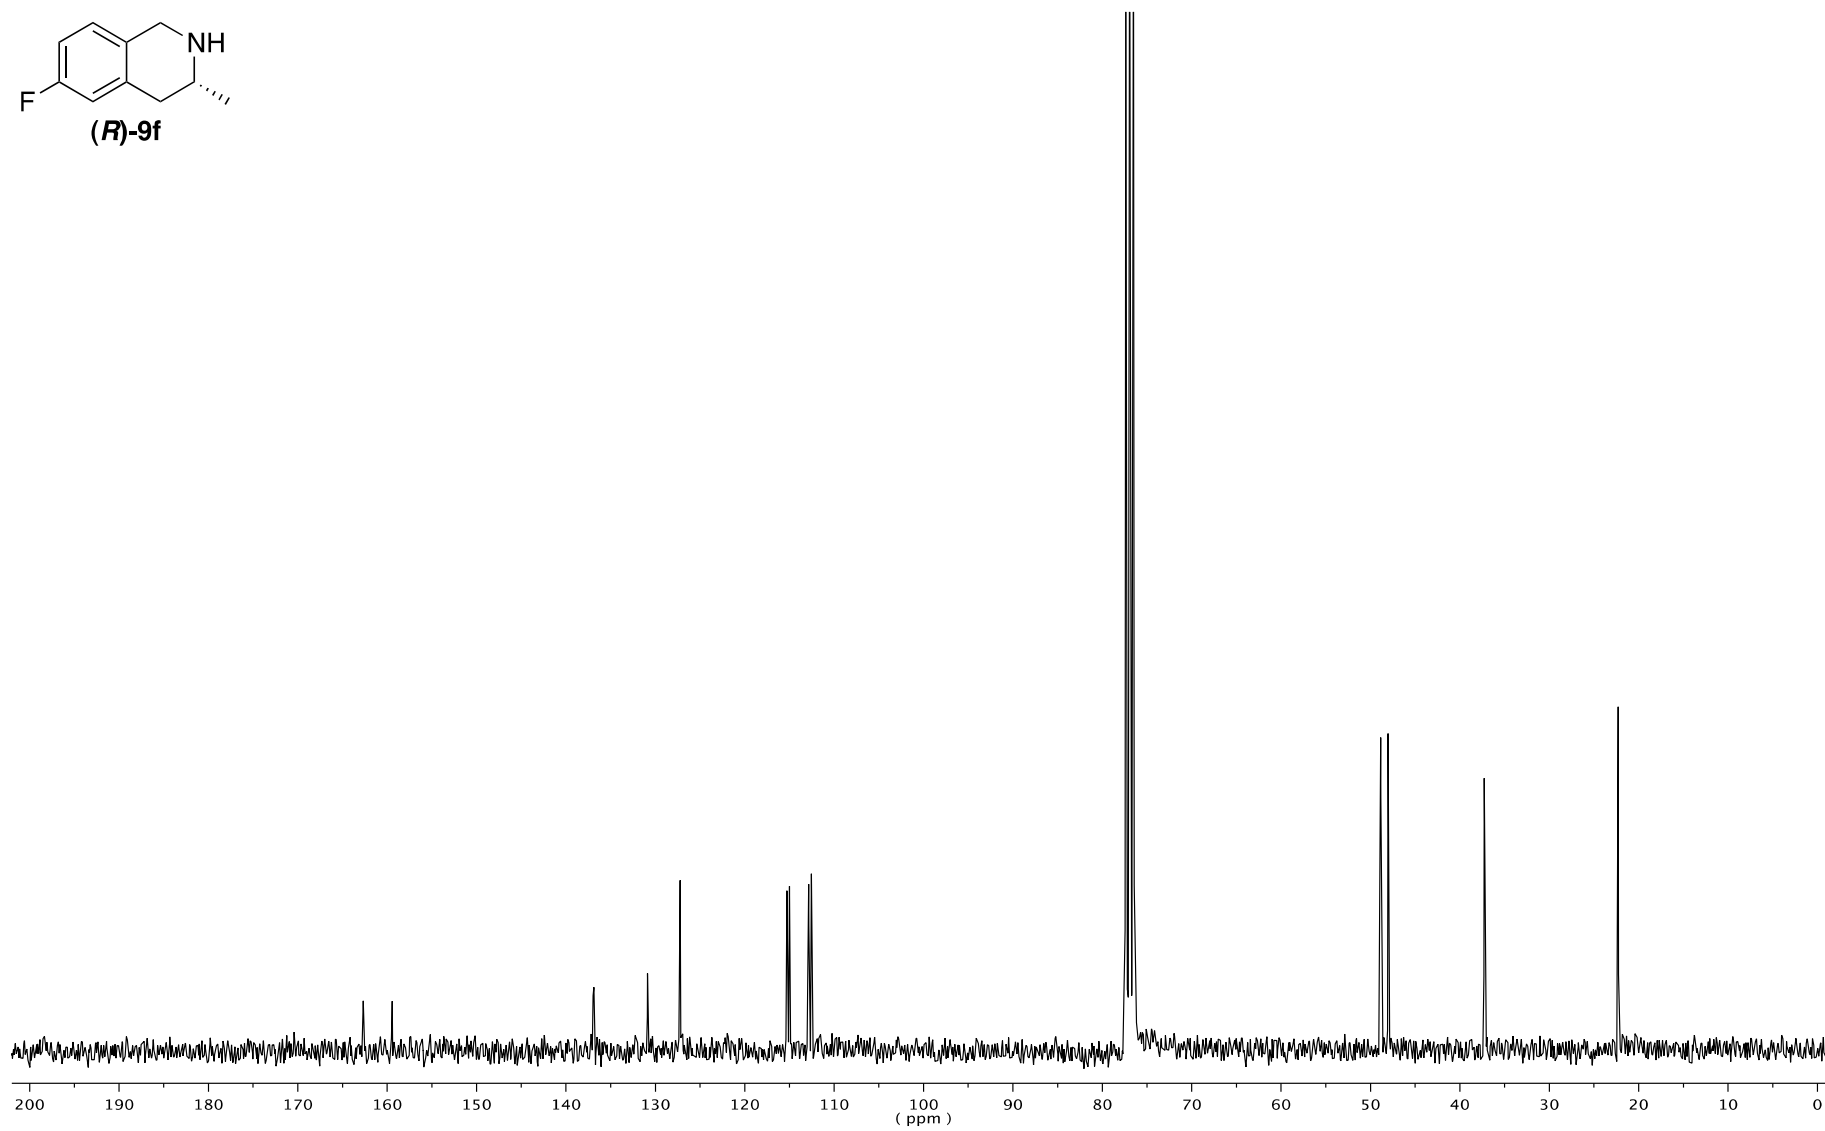

S130

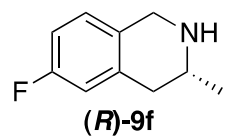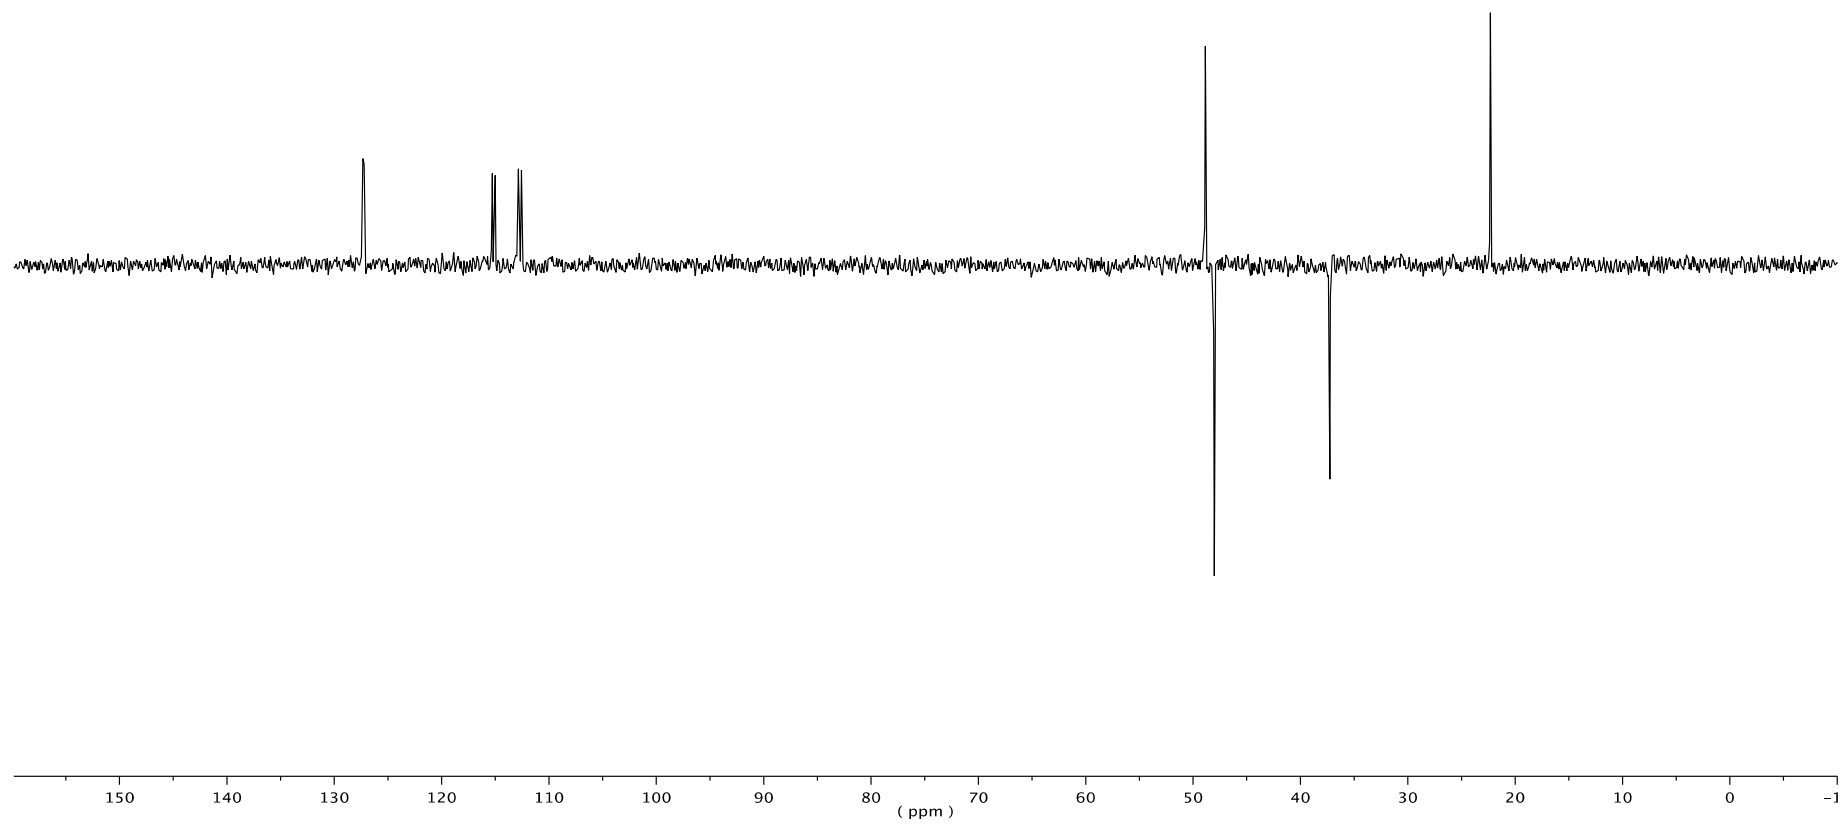

S131
